# Supplementary material for: Stress‐dependent macromolecular crowding in the mitochondrial matrix
Source: PubMed Central journal article supplement — EMBO J. 2023 Feb 24;42(7):e108533. doi: 10.15252/embj.2021108533 (PMC10068333; doi:10.15252/embj.2021108533), 2023-02-24
Supplement: EMBJ-42-e108533-s001.pdf [file EMBJ-42-e108533-s001.pdf]

# Stress-dependent macromolecular crowding in the mitochondrial matrix

Elianne P Bulthuis<sup>1,†,‡</sup> , Cindy E J Dieteren<sup>1,2,†,¶</sup>, Jesper Bergmans<sup>3</sup> , Job Berkhout<sup>1</sup>, Jori A Wagenaars<sup>1</sup>, Els M A van de Westerloo<sup>1</sup> , Emina Podhumljak<sup>1,§</sup>, Mark A Hink<sup>4</sup>, Laura F B Hesp<sup>1</sup>, Hannah S Rosa<sup>5</sup>, Afshan N Malik<sup>5</sup>, Mariska Kea-te Lindert<sup>2</sup>, Peter H G M Willems<sup>1</sup> , Han J G E Gardeniers<sup>6,7</sup> , Wouter K den Otter<sup>7,8,‡</sup> , Merel J W Adjobo-Hermans<sup>1,‡</sup>  & Werner J H Koopman<sup>3,9,\*</sup> 

## Abstract

Macromolecules of various sizes induce crowding of the cellular environment. This crowding impacts on biochemical reactions by increasing solvent viscosity, decreasing the water-accessible volume and altering protein shape, function, and interactions. Although mitochondria represent highly protein-rich organelles, most of these proteins are somehow immobilized. Therefore, whether the mitochondrial matrix solvent exhibits macromolecular crowding is still unclear. Here, we demonstrate that fluorescent protein fusion peptides (AcGFP1 concatemers) in the mitochondrial matrix of HeLa cells display an elongated molecular structure and that their diffusion constant decreases with increasing molecular weight in a manner typical of macromolecular crowding. Chloramphenicol (CAP) treatment impaired mitochondrial function and reduced the number of cristae without triggering mitochondrial orthodox-to-condensed transition or a mitochondrial unfolded protein response. CAP-treated cells displayed progressive concatemer immobilization with increasing molecular weight and an eightfold matrix viscosity increase, compatible with increased macromolecular crowding. These results establish that the matrix solvent exhibits macromolecular crowding in functional and dysfunctional mitochondria. Therefore, changes in matrix crowding likely affect matrix biochemical reactions in a manner depending on the molecular weight of the involved crowders and reactants.

**Keywords** chloramphenicol; diffusion; FRAP; macromolecular crowding; mitochondria

**Subject Category** Organelles

**DOI** 10.15252/embj.2021108533 | Received 21 April 2021 | Revised 10 January 2023 | Accepted 19 January 2023 | Published online 24 February 2023

**The EMBO Journal (2023) 42: e108533**

## Introduction

Mitochondria host a large variety of biochemical reactions, including the ATP-generating oxidative phosphorylation (OXPHOS) system (Smeitink *et al*, 2001; Rath *et al*, 2021). Structurally, mitochondria consist of an inner (MIM) and outer membrane (MOM), which surround the mitochondrial matrix compartment. The MIM contains many folds (cristae) that protrude into the matrix thereby providing a large surface area for biochemical reactions. Alterations in metabolic state are generally paralleled by dynamic changes in mitochondrial internal and external structure, matrix volume, and physicochemical properties of the matrix solvent (Hackenbrock, 1966; Perkins & Ellisman, 2011; Willems *et al*, 2015; Bulthuis *et al*, 2019). It is to be expected that these changes are functionally relevant through affecting matrix solute diffusion and biochemical reaction dynamics (Scalettar *et al*, 1991; Lizana *et al*, 2008; Perkins & Ellisman, 2011; Dieteren *et al*, 2011a; Cogliati *et al*, 2016; Sprenger & Langer, 2019).

- 1 Department of Biochemistry, Radboud Institute for Molecular Life Sciences (RIMLS), Radboud Center for Mitochondrial Medicine (RCMM), Radboud University Medical Centre (Radboudumc), Nijmegen, The Netherlands
  - 2 Department of Cell Biology and Electron Microscopy Center, Radboudumc, Nijmegen, The Netherlands
  - 3 Department of Pediatrics, Amalia Children's Hospital, Radboud Institute for Molecular Life Sciences (RIMLS), Radboud Center for Mitochondrial Medicine (RCMM), Radboud University Medical Center (Radboudumc), Nijmegen, The Netherlands
  - 4 Swammerdam Institute for Life Sciences, University of Amsterdam, Amsterdam, The Netherlands
  - 5 Department of Diabetes, King's College London, London, UK
  - 6 Mesoscale Chemical Systems, University of Twente, Enschede, The Netherlands
  - 7 MESA<sup>+</sup> Institute for Nanotechnology, University of Twente, Enschede, The Netherlands
  - 8 Thermal and Fluid Engineering, Faculty of Engineering Technology, University of Twente, Enschede, The Netherlands
  - 9 Human and Animal Physiology, Wageningen University, Wageningen, The Netherlands
- \*Corresponding author. Tel: +31 24 3614589; E-mail: werner.koopman@radboudumc.nl  
<sup>†</sup>These authors contributed equally to this work as first authors  
<sup>‡</sup>These authors contributed equally to this work as senior authors  
<sup>§</sup>Present address: Department of Human Genetics, Amsterdam UMC, Amsterdam, The Netherlands  
<sup>¶</sup>Present address: Protinhi Therapeutics, Nijmegen, The Netherlands  
<sup>#</sup>Present address: Khondrion B.V., Nijmegen, The Netherlands

Diffusion-limited bioreactions often involve “target finding” by (partially) mobile enzymes and/or substrates that need to diffuse towards a binding partner (Haggie & Verkman, 2002; Wilkens *et al.*, 2013; Dey & Bhattacharjee, 2019). An example of such a system is the biogenesis of OXPHOS Complex I (CI), which involves matrix diffusion of an 100–200 kDa assembly intermediate in search of a MIM-attached scaffold (Dieteren *et al.*, 2008, 2011b; Koopman *et al.*, 2010; Guerrero-Castillo *et al.*, 2017). However, our quantitative understanding of solute diffusion in the mitochondrial matrix is still limited. A key parameter in this respect is the solvent-dependent diffusion constant of the solute ( $D_{\text{solvent}}$ ; Weiss, 2014). For any given solute, the value of  $D_{\text{solvent}}$  is linked to the physicochemical properties of the solvent like viscosity ( $\eta_{\text{solvent}}$ ), absolute temperature ( $T$ ), and solute properties like molecular structure and molecular weight (MW). The former is quantitatively described by the radius of gyration ( $R_G$ ) and hydrodynamic radius ( $R_H$ ) of the solute (Einstein, 1905; Sutherland, 1905; von Smoluchowski, 1906; Young *et al.*, 1980; Tyn & Gusek, 1990; He & Niemeyer, 2003; Saxton, 2014). With respect to solute diffusion in the mitochondrial matrix, it has been previously demonstrated that mitochondrial cristae can act as diffusion barriers that impede the free diffusion of fluorescent proteins (FPs; Ölvéczky & Verkman, 1998; Partikian *et al.*, 1998; Dieteren *et al.*, 2011a).

In addition to cristae, macromolecular crowding is also a potential key factor influencing solute diffusion by increasing effective solvent viscosity and reducing the water-accessible volume via volume exclusion, the extent of which increases with crowder size (Boersma *et al.*, 2015; Rivas & Minton, 2016). In this way, macromolecular crowding can alter the hydrodynamic volume (compaction, shape, folding, structure, and conformational stability) and/or association state (protein–protein interactions, aggregation, oligomerization, and phase separation) of proteins (Kuznetsova *et al.*, 2014). This will affect their chemical reaction rates and/or molecular target finding (Dey & Bhattacharjee, 2019; Weilandt & Hatzimanikatis, 2019). Macromolecular crowding can also induce “molecular sieving” effects, which alter the translational mobility of biomolecules in an MW/size-dependent manner (Papadopoulos *et al.*, 2000; Mika *et al.*, 2010; Junker *et al.*, 2019; Van Tartwijk & Kaminski, 2022). In this sense, macromolecular crowding will reduce the diffusion coefficient of larger tracer molecules to a greater extent than predicted by the Stokes–Einstein equation (Mika *et al.*, 2010; Delarue *et al.*, 2018; Junker *et al.*, 2019). Experimental and theoretical studies suggest that modulation of macromolecular crowding can act as a (patho)physiological control mechanism in prokaryotes and eukaryotes (Scalettar *et al.*, 1991; Akabayov *et al.*, 2013; Poggi & Slade, 2015; Cravens *et al.*, 2015; Joyner *et al.*, 2015; Hansen *et al.*, 2016; Delarue *et al.*, 2018; Schavemaker *et al.*, 2018; Fuentes-Lemus *et al.*, 2021; Hochmair *et al.*, 2022; Vorontsova *et al.*, 2022). The mitochondrial matrix compartment is classically recognized as highly protein-rich. For instance, 46% of all mitochondrial proteins were predicted to be matrix-localized in humans (Rath *et al.*, 2021) and 20% of the mitochondrial proteins were classified as matrix-soluble in *Saccharomyces cerevisiae* (Vögle *et al.*, 2017). Therefore, it appears likely that the mitochondrial matrix fluid displays macromolecular crowding-related phenomena. However, given the biological functions of these matrix proteins (e.g., metabolism, mtDNA maintenance, OXPHOS assembly; Rath *et al.*, 2021), they might not always be expressed at the same levels and/or could be (transiently) MIM-

attached or otherwise immobilized. For example, four of the most abundant mitochondrial proteins (ATP5A1, ATP5B, ANT1, and ANT2) are membrane-bound (Calvo & Mootha, 2010). In addition, TCA cycle enzymes and subunits of the fatty acid  $\beta$ -oxidation multi-enzyme complex appear to be organized in (MIM-attached) multi-protein complexes with restricted mobility (Robinson & Srere, 1985; Partikian *et al.*, 1998; Haggie & Verkman, 2002; Fernie *et al.*, 2018). This suggests that the protein concentration of the mitochondrial matrix solvent might be (substantially) lower than generally assumed. Moreover, quantitative live-cell evidence demonstrating the existence of macromolecular crowding-related phenomena in the mitochondrial matrix fluid is lacking. Here, we aimed at providing such evidence by quantifying the mobility of matrix-targeted fluorescent protein (FP) concatemers of increasing MW (AcGFP1, AcGFP1<sup>2</sup>, AcGFP1<sup>3</sup>, and AcGFP1<sup>4</sup>). To this end, fluorescence recovery after photobleaching (FRAP) experiments and Brownian dynamics (BD) simulations were integrated to obtain quantitative estimates of  $D_{\text{solvent}}$  and  $\eta_{\text{solvent}}$  in functionally active and dysfunctional mitochondria. The obtained results support the conclusion that the mitochondrial matrix fluid displays macromolecular crowding and that this crowding is increased during chloramphenicol (CAP)-induced mitochondrial dysfunction.

## Results

A key phenomenon associated with macromolecular crowding is that it reduces the translational mobility of solutes with a similar or larger size than the crowder to a greater extent than the mobility of smaller solutes (e.g., Mika *et al.*, 2010; Delarue *et al.*, 2018; Junker *et al.*, 2019; Van Tartwijk & Kaminski, 2022). The solvent-dependent translational mobility of a solute in the mitochondrial matrix is quantitatively described by its solvent-dependent diffusion constant ( $D_{\text{solvent}}$ ). Therefore, we here quantified  $D_{\text{solvent}}$  values of mitochondria-targeted AcGFP1 concatemers of increasing MW (AcGFP1, AcGFP1<sup>2</sup>, AcGFP1<sup>3</sup>, and AcGFP1<sup>4</sup>) in HeLa cells. To this end, fluorescence recovery after photobleaching (FRAP) analysis of these fluorescent proteins (FPs) was combined with predictive, experimentally constrained, Brownian dynamics (BD) computer simulations. This strategy aimed at delivering quantitative estimates for  $D_{\text{solvent}}$  and matrix solvent viscosity ( $\eta_{\text{solvent}}$ ) in functional mitochondria, as well as in dysfunctional mitochondria treated with the mitochondrial RNA (mtRNA) translation inhibitor chloramphenicol (CAP). Interpretation of these estimates was used to gain insight into macromolecular crowding, concatemer structural conformation, and  $\eta_{\text{solvent}}$  in the mitochondrial matrix (Fig 1).

### Expression, localization, and integrity of mitochondrial matrix-targeted FPs

Four HeLa cell lines were created that stably expressed matrix-targeted AcGFP1 concatemers. These proteins were targeted to the mitochondrial matrix using N-terminal fusions with a mitochondrial targeting sequence (MTS), consisting of a 25-residue Cox8 sequence. In case of AcGFP1<sup>4</sup>, a double MTS was used to improve mitochondrial matrix delivery (Filippin *et al.*, 2005). AcGFP1 and MTS domains were connected by flexible peptide linkers (Appendix Table S1), and FP expression was controlled by a doxycycline

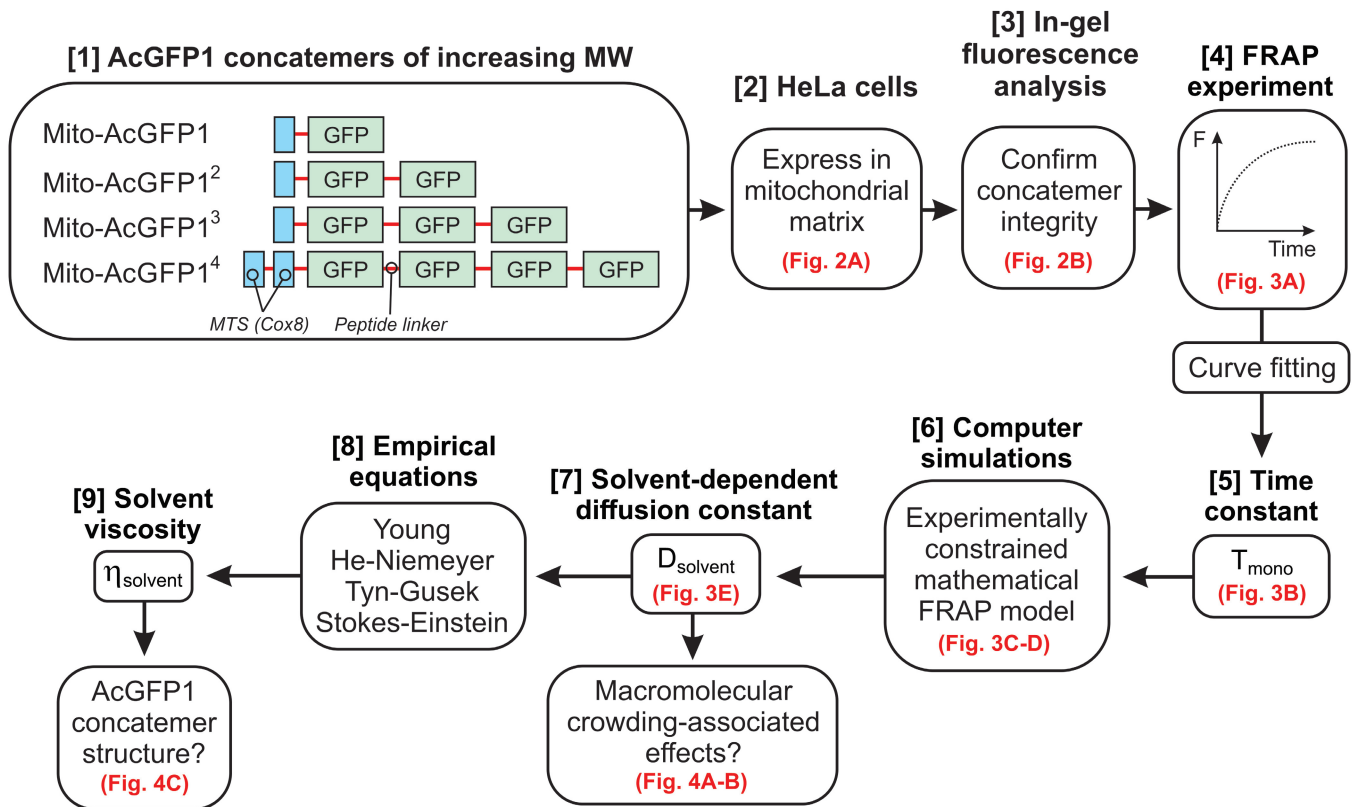

**Figure 1. Integrated strategy for quantifying the solvent-dependent diffusion constants of mitochondrial matrix-targeted fluorescent proteins and mitochondrial matrix solvent viscosity.**

Corresponding figures are highlighted in red. Four mitochondrial matrix-targeted concatemers of the monomeric fluorescent protein AcGFP1 [1] were stably expressed in HeLa cells [2]. The integrity and mobility of these fluorescent proteins (FPs) was investigated by in-gel fluorescence analysis [3] and fluorescence recovery after photobleaching (FRAP) recordings [4], respectively. Curve fitting was applied to obtain a mono-exponential FRAP time constant for each concatemer ( $T_{\text{mono}}$ ) [5]. The latter were fed into an experimentally constrained mathematical FRAP model [6] to compute solvent-dependent diffusion constants ( $D_{\text{solvent}}$ ) [7]. By inserting these constants into four empirical equations [8], the viscosity of the mitochondrial matrix solvent ( $\eta_{\text{solvent}}$ ) was determined [9]. Finally, the obtained  $\eta_{\text{solvent}}$  and  $D_{\text{solvent}}$  values were interpreted to draw conclusions on the structural conformation of the concatemers and the presence of macromolecular crowding phenomena in the mitochondrial matrix.

(DOX)-inducible promoter. Following induction, all FPs displayed a mitochondrial localization as demonstrated by confocal microscopy and MitoTracker Red co-staining (Fig 2A). Western blot analysis of mitochondrial fractions demonstrated that DOX treatment increased the in-gel fluorescence and expression of the FPs (Fig 2B; marked by \*). AcGFP1 and AcGFP1<sup>2</sup> displayed a single major fluorescent product, compatible with our previous findings with DOX-inducible HEK293 cells (Dieteren *et al*, 2008, 2011a, 2011b). Similarly, AcGFP1<sup>3</sup>-expressing cells displayed a single fluorescence band albeit of much lower intensity. By contrast, mitochondria in AcGFP1<sup>4</sup>-expressing cells contained two fluorescence products, one of the expected size (Fig 2B; marked by \*) and another of lower MW (marked by #). Fluorescence analysis by flow cytometry (Fig 2C) correlated well with in-gel fluorescence signals (Fig 2D). This demonstrates that all inducible FP cell lines exhibit a low fluorescence signal in their noninduced state and strongly suggests that the cellular fluorescence intensities reflect mitochondria-specific signals. The former observation is compatible with low-level induction (“leakage”) of FP expression in the mitochondrial matrix occurring

in the absence of added DOX, as observed previously in our DOX-inducible HEK293 cell models (Dieteren *et al*, 2011b).

#### Experimental FRAP analysis of mitochondrial matrix-targeted FP mobility

FP mobility in the mitochondrial matrix was determined by confocal FRAP analysis of individual mitochondria. In this approach, mitochondrial fluorescence is rapidly bleached in a square region of interest (ROI) placed at one end of a single mitochondrial filament (Fig 3A; inset), followed by quantification of fluorescence recovery (Appendix Fig S2). As a quality control measure, this analysis included only individual mitochondria: (i) that were fully located within the focal plane (confirmed by an axial scan), and (ii) in which FRAP was paralleled by fluorescence loss in photobleaching (FLIP) in a part distal to the FRAP region (Appendix Fig S2), indicating that these mitochondria possessed a continuous matrix. Combining multiple experiments yielded an average FRAP curve for each FP (Fig 3A), which was adequately fitted by a mono-exponential

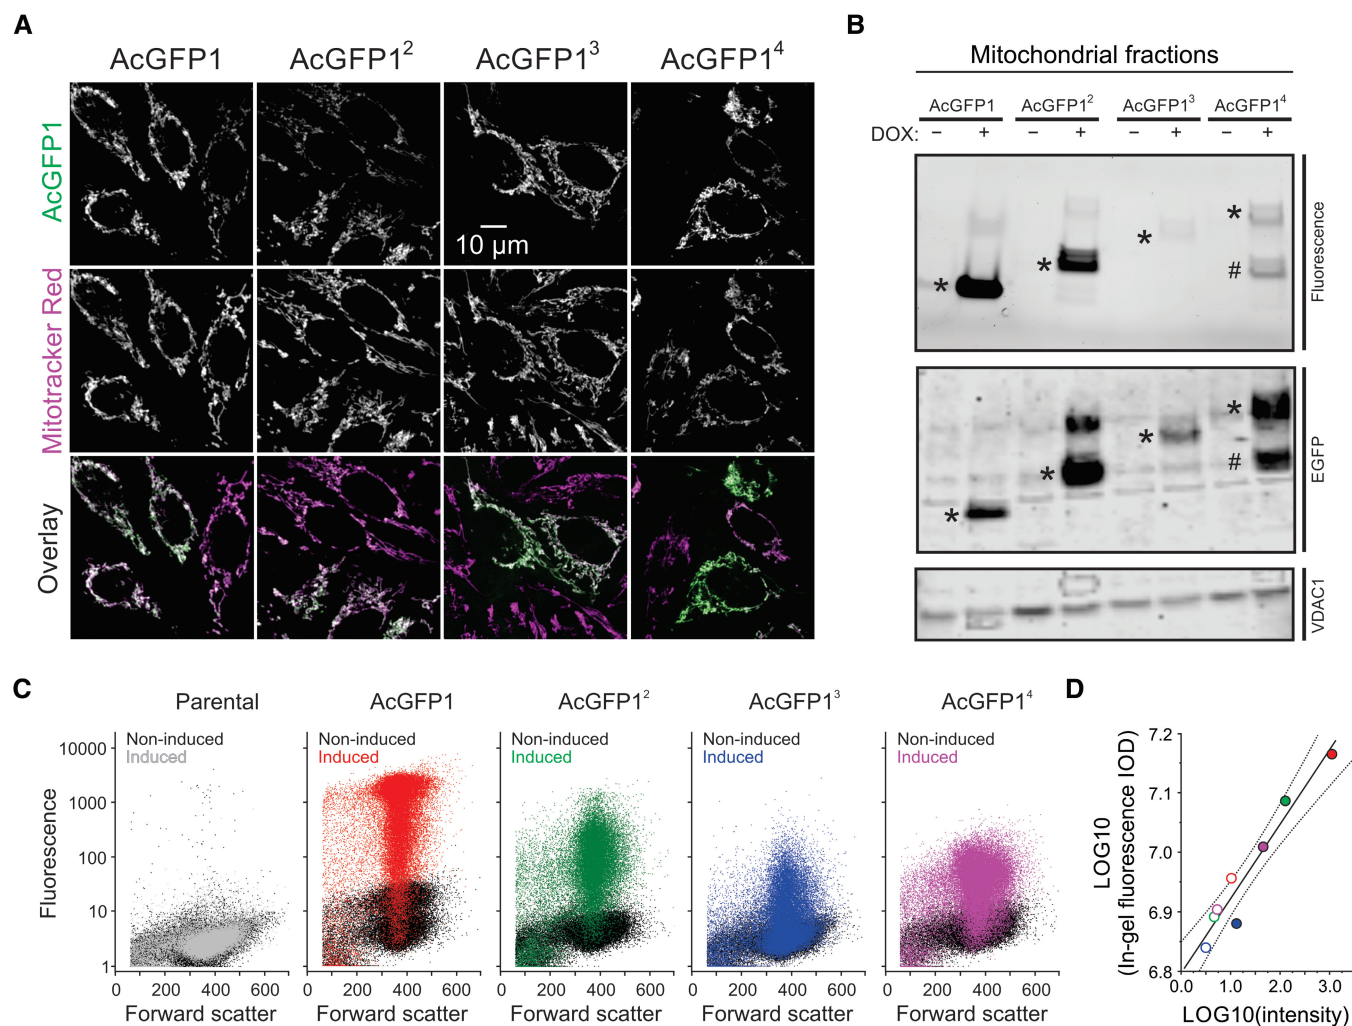

**Figure 2. Expression and localization of the mitochondrial matrix-targeted fluorescent proteins.**

- A** Cellular localization of the four AcGFP1 concatemers (AcGFP1, AcGFP1<sup>2</sup>, AcGFP1<sup>3</sup>, AcGFP1<sup>4</sup>) in HeLa cell lines cultured in the presence of the expression inducer doxycycline (DOX). Images were acquired by confocal microscopy and depict typical fluorescence signals of AcGFP1 (upper row), the mitochondrial marker Mitotracker Red CM-H<sub>2</sub>XROS (middle row), and an overlay of these signals (lower row; AcGFP1 in green; Mitotracker Red CM-H<sub>2</sub>XROS in magenta; colocalization in white).
- B** Analysis of FP expression and concatemer integrity in mitochondrial fractions isolated from HeLa cells cultured in the absence (–) and presence (+) of DOX. The panels display AcGFP1 fluorescence (SDS–PAGE fluorogram; upper panel), AcGFP1 protein signals (SDS–PAGE; anti-EGFP immunodetection; middle panel) and VDAC1 protein signals (SDS–PAGE; loading control; lower panel). Bands for AcGFP1, AcGFP1<sup>2</sup>, AcGFP1<sup>3</sup> and AcGFP1<sup>4</sup> are marked by asterisks (\*). For AcGFP1<sup>4</sup>, also a substantial band of lower MW was detected (marked #). Individual panels were contrast-optimized for visualization purposes. Original blots are presented in Appendix Fig S1A.
- C** Flow cytometry analysis of the parental and FP-expressing HeLa cell lines. Fluorescence intensity is plotted against forward scatter. The noninduced condition (i.e., in absence of DOX) is depicted by black symbols. The effects of DOX are marked in gray (parental cells) and various colors (FP-expressing cells). For AcGFP1, AcGFP1<sup>2</sup> (noninduced), AcGFP1<sup>3</sup> and AcGFP1<sup>4</sup> a total of  $n = 40,000$  cells from four technical replicates were analyzed on a single day ( $N = 1$ ). For the AcGFP1<sup>2</sup>-induced condition  $n = 30,000$  cells from three technical replicates are depicted ( $N = 1$ ).
- D** Correlation between the average AcGFP1 fluorescence intensity in panel (C) (x-axis) and the integrated optical density (IOD; y-axis) for each condition (full lane) in panel (B) (in-gel fluorescence signal; the original gel was used for quantification). Noninduced cells are marked by open symbols; induced cells are marked with colored symbols (similar to panel C). The continuous line represents a linear fit to the data ( $R = 0.966$ ;  $P < 0.0001$ ). Dotted lines indicate the 95% confidence limits of the fit.

equation (Table 1). The recovery time constant of this fit ( $T_{\text{mono}}$ ), representing the FRAP rate, increased with increasing MW (Table 1 and Fig 3B). This agrees with our previous results with mitochondrial matrix-targeted AcGFP1<sup>1</sup> and AcGFP1<sup>2</sup> in HEK293 cells (Dieteren *et al*, 2011a) and demonstrates that FRAP is slower for FPs with a larger MW. The FP mobile fraction ( $F_m$ ) somewhat decreased with increasing MW (Table 1 and Fig 3A), suggesting that the FPs

became progressively immobilized. A proper comparison of  $T_{\text{mono}}$  between the different FPs requires that their MW is taken into account (Sprague & McNally, 2005). In case of AcGFP1<sup>4</sup>, the fluorescent product of lower MW (Fig 2B) accelerated the average FRAP rate for this FP leading to an underestimation of  $T_{\text{mono}}$ . To correct for this effect, a straight line was fitted through the origin and the  $T_{\text{mono}}$  data points for AcGFP1, AcGFP1<sup>2</sup>, and AcGFP1<sup>3</sup> (Fig 3B).



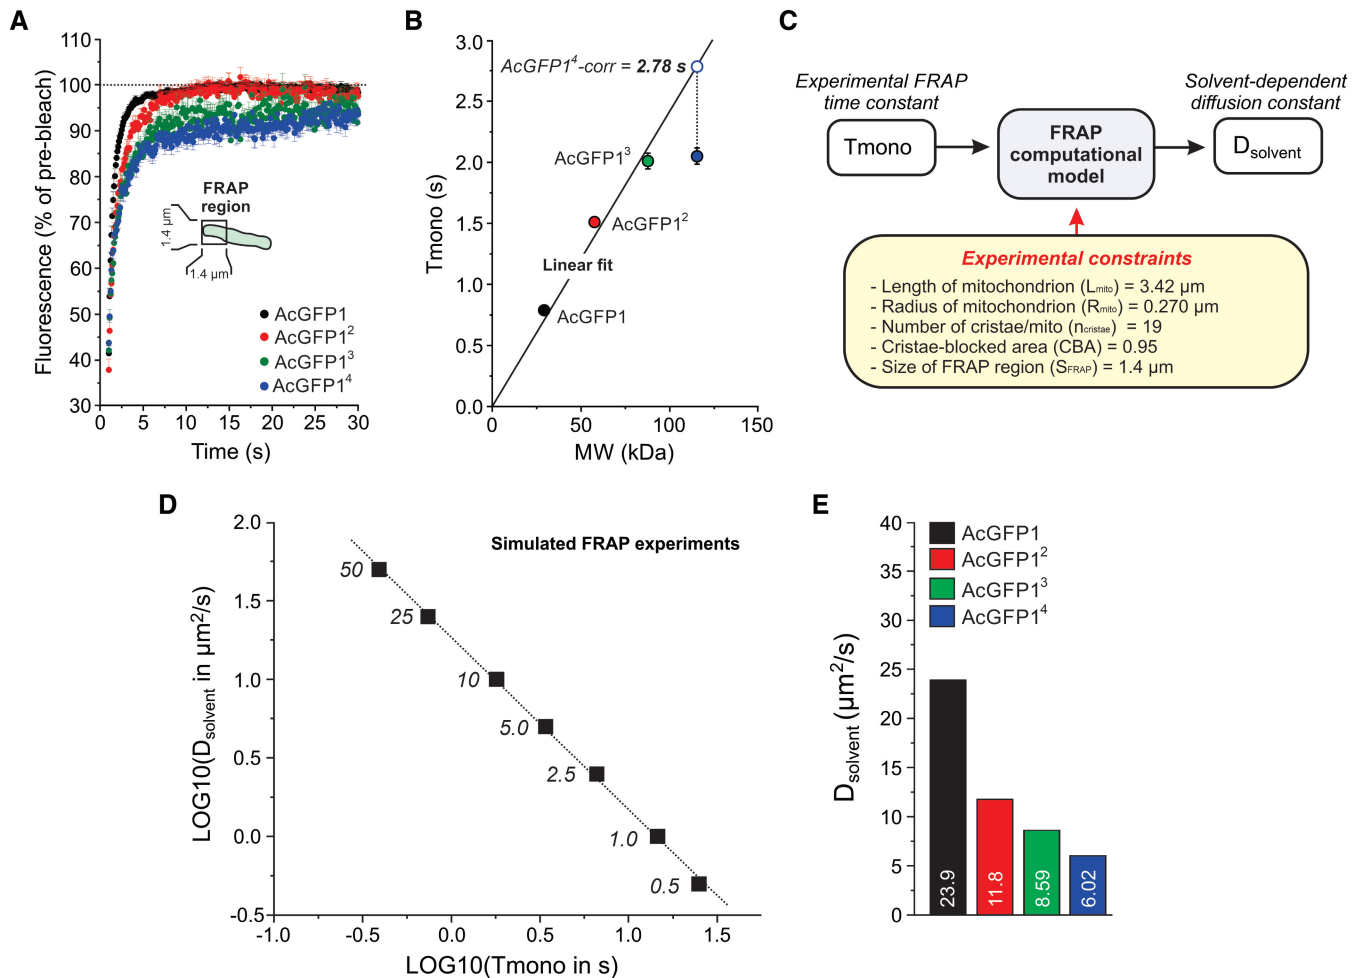

**Figure 3. Solvent-dependent mobility of the mitochondrial matrix-targeted fluorescent proteins.**

- A** Average mitochondrial fluorescence recovery after photobleaching (FRAP) curves for the four FPs. These curves were fitted using a mono-exponential function to determine the FRAP recovery time constant  $T_{\text{mono}}$ . Symbols and error bars indicate mean  $\pm$  SEM. Data was obtained in at least  $N = 3$  independent experiments for  $n = 76$  mitochondria (AcGFP1),  $n = 30$  (AcGFP1<sup>2</sup>),  $n = 37$  (AcGFP1<sup>3</sup>) and  $n = 68$  (AcGFP1<sup>4</sup>).
- B** Relationship between the molecular weight (MW) of the FPs and their FRAP time constant ( $T_{\text{mono}}$ ; numerical data are provided in Table 1). A linear fit was calculated through the origin and the data points for AcGFP1, AcGFP1<sup>2</sup> and AcGFP1<sup>3</sup> ( $R = 0.993$ ,  $P = 0.022$ ;  $T_{\text{mono}} = B \cdot \text{MW}$ ;  $B$  (slope) =  $0.0241 \pm 0.00118$  (SE)). The experimental  $T_{\text{mono}}$  value for AcGFP1<sup>4</sup> (filled blue symbol) was corrected using this linear fit (dotted line; see Results for details) yielding a new  $T_{\text{mono}}$  value ("AcGFP1<sup>4</sup>-corr"). Symbols and error bars reflect mean  $\pm$  SE (standard error) values from the mono-exponential fit.
- C** Strategy to compute  $D_{\text{solvent}}$  from the experimental  $T_{\text{mono}}$  value for each FP using an experimentally constrained BD simulation model (see Results and Appendix Supplementary Methods for details).
- D** Linear relationship between  $\text{LOG}_{10}(T_{\text{mono}})$  and  $\text{LOG}_{10}(D_{\text{solvent}})$  predicted by the model for a mitochondrion containing 19 cristae and with a cristae-blocked area (CBA) of 0.95. Parameters of the linear fit ( $\text{LOG}_{10}(D_{\text{solvent}}) = A + B \cdot \text{LOG}_{10}(T_{\text{mono}})$ ) are:  $R = -0.999$ ,  $P < 0.0001$ ;  $A$  (intercept) =  $1.27 \pm 0.0123$  (SE);  $B$  (slope) =  $-1.10 \pm 0.0154$  (SE). Numerals indicate the  $D_{\text{solvent}}$  values ( $\mu\text{m}^2/\text{s}$ ) used in the model (the corresponding FRAP data are presented in Appendix Fig S3B).
- E**  $D_{\text{solvent}}$  values of the four FPs (numerals) obtained using the relationship in panel (D) by inserting the experimental  $T_{\text{mono}}$  values in the fitting equation for panel (D) (see Results for details). Numerical data are provided in Table 1.

Next, the measured  $T_{\text{mono}}$  value for AcGFP1<sup>4</sup> was projected on the fitted line yielding a corrected ("AcGFP1<sup>4</sup>-corr") value (Fig 3B; dotted line and open symbol). This corrected  $T_{\text{mono}}$  value was used in the remainder of the study.

### Brownian dynamics simulations of FRAP experiments

To convert the experimental  $T_{\text{mono}}$  data into  $D_{\text{solvent}}$  values, we developed a Brownian dynamics (BD) simulation model (Fig 3C).

This quantitative model generated synthetic FRAP curves, used a cristae-containing cylindrical structure to represent mitochondria, and was constrained by experimental data. The latter included mitochondrial length ( $L_{\text{mito}}$ ), mitochondrial radius ( $R_{\text{mito}}$ ), size of the FRAP region ( $S_{\text{FRAP}}$ ), the number of cristae per mitochondrion ( $n_{\text{cristae}}$ ), and the "cristae-blocked area" (CBA; expressed as a fraction of the total transecting area). Validated by EM analysis and data on HeLa cristae structure from the literature (Appelhans *et al.*, 2011; Wilkens *et al.*, 2013; Wolf *et al.*, 2019; Hu *et al.*, 2020; Segawa

Table 1. Experimental data and BD modeling results.

| Cell line                                                                                                                            | –CAP                                                                                              |                           |                           |                            | +CAP                       |                     |                     |                           |
|--------------------------------------------------------------------------------------------------------------------------------------|---------------------------------------------------------------------------------------------------|---------------------------|---------------------------|----------------------------|----------------------------|---------------------|---------------------|---------------------------|
|                                                                                                                                      | AcGFP1                                                                                            | AcGFP1 <sup>2</sup>       | AcGFP1 <sup>3</sup>       | AcGFP1 <sup>4</sup>        | AcGFP1                     | AcGFP1 <sup>2</sup> | AcGFP1 <sup>3</sup> | AcGFP1 <sup>4</sup>       |
| MW (kDa) <sup>a</sup>                                                                                                                | 29.155                                                                                            | 57.586                    | 87.705                    | 115.337                    | 29.155                     | 57.586              | 87.705              | 115.337                   |
| LOG10 (MW)                                                                                                                           | 1.4641                                                                                            | 1.7603                    | 1.9430                    | 2.06197                    | 1.4641                     | 1.7603              | 1.9430              | 2.06197                   |
| Mitochondrial length, diameter and radius determined using confocal laser scanning microscopy (CLSM) <sup>b</sup>                    |                                                                                                   |                           |                           |                            |                            |                     |                     |                           |
| L <sub>mito</sub> (μm)                                                                                                               | 3.42 (N = 55)                                                                                     | 3.42 (N = 30)             | 3.42 (N = 37)             | 3.42 (N = 68)              | 3.40 (N = 31)              | ND                  | ND                  | 3.42 (N = 26)             |
| D <sub>mito</sub> (μm)                                                                                                               | 0.562 ± 0.025<br>(N = 26)                                                                         | 0.524 ± 0.012<br>(N = 41) | 0.549 ± 0.020<br>(N = 33) | 0.525 ± 0.017<br>(N = 29)  | 0.552 ± 0.015<br>(N = 24)  | ND                  | ND                  | 0.546 ± 0.017<br>(N = 20) |
| R <sub>mito</sub> (μm)                                                                                                               | 0.281                                                                                             | 0.262                     | 0.275                     | 0.263                      | 0.276                      | ND                  | ND                  | 0.273                     |
| V <sub>mito</sub> (μm <sup>3</sup> )                                                                                                 | 0.848                                                                                             | 0.738                     | 0.813                     | 0.743                      | 0.819                      | ND                  | ND                  | 0.801                     |
| V <sub>mito</sub> (l)                                                                                                                | 0.848·10 <sup>-15</sup>                                                                           | 0.738·10 <sup>-15</sup>   | 0.813·10 <sup>-15</sup>   | 0.743·10 <sup>-15</sup>    | 0.819·10 <sup>-15</sup>    | ND                  | ND                  | 0.801·10 <sup>-15</sup>   |
| Mitochondrial diameter, radius and cristae per mitochondrion determined using electron microscopy (EM) <sup>c</sup>                  |                                                                                                   |                           |                           |                            |                            |                     |                     |                           |
| D <sub>mito</sub> (μm)                                                                                                               | 0.510 ± 0.019<br>(N = 52)                                                                         | ND                        | ND                        | 0.504 ± 0.015<br>(N = 59)  | 0.490 ± 0.017<br>(N = 51)  | ND                  | ND                  | 0.494 ± 0.018<br>(N = 53) |
| R <sub>mito</sub> (μm)                                                                                                               | 0.255                                                                                             | ND                        | ND                        | 0.252                      | 0.245                      | ND                  | ND                  | 0.247                     |
| n <sub>cristae</sub> (1/μm)                                                                                                          | 5.620 ± 0.155<br>(N = 244)                                                                        | ND                        | ND                        | 5.462 ± 0.174<br>(N = 314) | 2.705 ± 0.130<br>(N = 295) | ND                  | ND                  | 3.50 ± 0.145<br>(N = 260) |
| n <sub>cristae</sub> /mito                                                                                                           | 19                                                                                                | ND                        | ND                        | 19                         | 9                          | ND                  | ND                  | 12                        |
| Mono-exponential fitting parameters of the fluorescence recovery after photobleaching (FRAP) curve <sup>d</sup>                      |                                                                                                   |                           |                           |                            |                            |                     |                     |                           |
| N                                                                                                                                    | 76                                                                                                | 30                        | 37                        | 68                         | 40                         | 24                  | 26                  | 33                        |
| R <sup>2</sup>                                                                                                                       | 0.922                                                                                             | 0.971                     | 0.932                     | 0.921                      | 0.962                      | 0.947               | 0.780               | 0.951                     |
| y <sub>0</sub>                                                                                                                       | -80.0 ± 5.85                                                                                      | -0.677 ± 2.42             | 24.7 ± 2.29               | 30.7 ± 2.17                | 39.1 ± 1.20                | 30.9 ± 0.800        | 44.2 ± 0.920        | 47.5 ± 0.767              |
| A <sub>mono</sub>                                                                                                                    | 178 ± 5.84                                                                                        | 98.9 ± 2.40               | 68.6 ± 2.26               | 60.5 ± 2.14                | 55.4 ± 1.17                | 45.1 ± 0.667        | 23.6 ± 0.763        | 39.0 ± 0.706              |
| T <sub>mono</sub> (s)                                                                                                                | 0.789 ± 0.015                                                                                     | 1.51 ± 0.031              | 2.01 ± 0.065              | 2.05 ± 0.066               | 2.75 ± 0.099               | 8.76 ± 0.357        | 9.31 ± 0.883        | 5.43 ± 0.168              |
| T <sub>mono-corr</sub> (s)                                                                                                           |                                                                                                   |                           |                           | 2.78                       |                            |                     |                     |                           |
| F <sub>0</sub>                                                                                                                       | 41.4 ± 1.61%                                                                                      | 37.7 ± 2.40%              | 42.0 ± 1.80%              | 43.6 ± 1.22%               | 42.0 ± 2.60%               | 22.7 ± 3.38%        | 40.2 ± 4.51%        | 42.6 ± 2.50%              |
| F <sub>∞</sub>                                                                                                                       | 98.8 ± 11.7%                                                                                      | 98.2 ± 4.82%              | 93.3 ± 4.55%              | 91.2 ± 4.31%               | 94.5 ± 2.37%               | 76.0 ± 1.47%        | 67.8 ± 1.68%        | 86.5 ± 1.47%              |
| F <sub>m</sub>                                                                                                                       | 0.979                                                                                             | 0.972                     | 0.885                     | 0.844                      | 0.904                      | 0.689               | 0.462               | 0.765                     |
| Parameters and results regarding the BD model <sup>e</sup>                                                                           |                                                                                                   |                           |                           |                            |                            |                     |                     |                           |
| 1. Simulation parameters for D <sub>solvent</sub> prediction                                                                         |                                                                                                   |                           |                           |                            |                            |                     |                     |                           |
| Identical for all simulations                                                                                                        | L <sub>mito</sub> = 3.42 μm; R <sub>mito</sub> = 0.270 μm; S <sub>FRAP</sub> = 1.4 μm; CBA = 0.95 |                           |                           |                            |                            |                     |                     |                           |
| n <sub>cristae</sub>                                                                                                                 | 19                                                                                                | 19                        | 19                        | 19                         | 9                          | ND                  | ND                  | 12                        |
| 2. Predicted D <sub>solvent</sub>                                                                                                    |                                                                                                   |                           |                           |                            |                            |                     |                     |                           |
| D <sub>solvent</sub> (μm <sup>2</sup> /s)                                                                                            | 23.9                                                                                              | 11.8                      | 8.59                      | 6.02                       | 2.91                       | NA                  | NA                  | NA                        |
| LOG10 (D <sub>solvent</sub> )                                                                                                        | 1.378                                                                                             | 1.072                     | 0.9340                    | 0.7796                     | 0.464                      | NA                  | NA                  | NA                        |
| 3. Computation of radius of gyration (R <sub>C</sub> ), hydrodynamic radius (R <sub>H</sub> ) and η <sub>solvent</sub> (cP) at 293 K |                                                                                                   |                           |                           |                            |                            |                     |                     |                           |
| MW (kDa)                                                                                                                             | 29.155                                                                                            | 57.586                    | 87.705                    | 115.337                    | 29.155                     | 57.586              | 87.705              | 115.337                   |
| Assuming that the FP has a compact conformation                                                                                      |                                                                                                   |                           |                           |                            |                            |                     |                     |                           |
| Radius of molecule R (Å)                                                                                                             | 15                                                                                                | 20                        | 20                        | 20                         | 15                         | NA                  | NA                  | NA                        |
| Length of molecule L (Å)                                                                                                             | 40                                                                                                | 60                        | 60                        | 60                         | 40                         | NA                  | NA                  | NA                        |
| R <sub>C</sub> (Å)                                                                                                                   | 15.5                                                                                              | 20                        | 20                        | 20                         | 15.5                       | NA                  | NA                  | NA                        |
| R <sub>H</sub> (Å)                                                                                                                   | 20                                                                                                | 23                        | 23                        | 23                         | 20                         | NA                  | NA                  | NA                        |
| η <sub>solvent</sub> (Young)                                                                                                         | 3.32                                                                                              | 5.36                      | 6.40                      | 8.34                       | 27.3                       | NA                  | NA                  | NA                        |
| η <sub>solvent</sub> (He-Niemeyer)                                                                                                   | 3.69                                                                                              | 5.88                      | 7.53                      | 10.3                       | 30.3                       | NA                  | NA                  | NA                        |

Table 1 (continued)

| Cell line                                         | -CAP   |                     |                     |                     | +CAP   |                     |                     |                     |
|---------------------------------------------------|--------|---------------------|---------------------|---------------------|--------|---------------------|---------------------|---------------------|
|                                                   | AcGFP1 | AcGFP1 <sup>2</sup> | AcGFP1 <sup>3</sup> | AcGFP1 <sup>4</sup> | AcGFP1 | AcGFP1 <sup>2</sup> | AcGFP1 <sup>3</sup> | AcGFP1 <sup>4</sup> |
| $\eta_{\text{solvent}}$ (Tyn-Gusek)               | 4.57   | 7.18                | 9.86                | 14.1                | 37.5   | NA                  | NA                  | NA                  |
| $\eta_{\text{solvent}}$ (Stokes-Einstein)         | 4.49   | 7.91                | 10.9                | 15.5                | 36.9   | NA                  | NA                  | NA                  |
| Assuming that the FP has an extended conformation |        |                     |                     |                     |        |                     |                     |                     |
| Radius of molecule R (Å)                          | 15     | 15                  | 35                  | 35                  | 15     | NA                  | NA                  | NA                  |
| Length of molecule L (Å)                          | 40     | 130                 | 247                 | 349                 | 40     | NA                  | NA                  | NA                  |
| $R_G$ (Å)                                         | 15.5   | 38                  | 73                  | 102                 | 15.5   | NA                  | NA                  | NA                  |
| $R_H$ (Å)                                         | 20     | 30                  | 61                  | 75                  | 20     | NA                  | NA                  | NA                  |
| $\eta_{\text{solvent}}$ (Young)                   | 3.32   | 5.36                | 6.40                | 8.34                | 27.3   | NA                  | NA                  | NA                  |
| $\eta_{\text{solvent}}$ (He-Niemeyer)             | 3.69   | 4.27                | 3.94                | 4.55                | 30.3   | NA                  | NA                  | NA                  |
| $\eta_{\text{solvent}}$ (Tyn-Gusek)               | 4.57   | 3.78                | 2.70                | 2.76                | 37.5   | NA                  | NA                  | NA                  |
| $\eta_{\text{solvent}}$ (Stokes-Einstein)         | 4.49   | 6.06                | 4.10                | 4.75                | 36.9   | NA                  | NA                  | NA                  |

BD, Brownian dynamics; CAP, chloramphenicol;  $D_{\text{solvent}}$ , solvent-dependent diffusion constant;  $\eta_{\text{solvent}}$ , solvent-dependent viscosity; NA, not appropriate; ND, not determined;  $R_G$ , radius of gyration;  $R_H$ , hydrodynamic radius;  $S_{\text{FRAP}}$ , size of the experimental FRAP region in the BD model; T, temperature;  $T_{\text{mono}}$ , experimental FRAP mono-exponential time constant.

<sup>a</sup>Molecular weight (MW) was calculated directly from the protein sequences given in Appendix Table S1 (excluding the N-terminal mitochondrial targeting sequence) using the pl/Mw tool ([web.expasy.org/compute\\_pi](http://web.expasy.org/compute_pi)). One (1) Dalton (Da) equals 1 g/mol.

<sup>b</sup>Confocal laser scanning microscopy (CLSM) analysis: The data are presented as mean  $\pm$  SEM.  $N$  indicates the number of mitochondria analyzed in at least two independent experiments. Mitochondrial length ( $L_{\text{mito}}$ ) and mitochondrial diameter ( $D_{\text{mito}}$ ) were determined from the FRAP images by quantifying the frame width at half-maximal height (FWHM; equaling  $2 \cdot R_{\text{mito}}$ ) of a Gaussian curve fitted to a 1 pixel wide intensity profile perpendicular to the short and long axis of the mitochondrial filament (see Appendix Fig S2F). Mitochondrial volume ( $V_{\text{mito}}$ ) was calculated using a cylindrical approximation:  $V_{\text{mito}} = \pi \cdot (R_{\text{mito}})^2 \cdot L_{\text{mito}}$ . One (1)  $\mu\text{m}^3$  equals  $10^{-15}$  liter, 0.001 picoliter ( $1 \text{ picoliter} = 10^{-12}$  liter) and 1,000 attoliter ( $1 \text{ attoliter} = 10^{-18}$  liter). Average  $V_{\text{mito}}$  values equaled  $0.786 \pm 0.0540$  (SD)  $\mu\text{m}^3 = 786$  attoliter (-CAP) and  $0.810 \mu\text{m}^3 = 810$  attoliter (+CAP).

<sup>c</sup>Electron microscopy (EM) analysis: The data are presented as mean  $\pm$  SEM.  $N$  indicates the number of mitochondria analyzed in two independent experiments.  $D_{\text{mito}}$  and  $R_{\text{mito}}$  indicate the mitochondrial diameter and radius, respectively.

<sup>d</sup>Fitting of the fluorescence recovery after photobleaching (FRAP) curve:  $y = y_0 + A_{\text{mono}}[1 - \exp(-t/T_{\text{mono}})]$ .  $N$  indicates the number of mitochondria analyzed in at least three independent experiments. The coefficient of determination ( $R^2$ ) is used as a measure of the goodness of fit (the closer  $R^2$  is to a value of one, the closer the fit is to the data points). The parameter errors reflect the standard error (SE) value from the fit, as reported by the fitting software.  $F_0$  indicates the fluorescence signal at the start of the fluorescence recovery (expressed as % of the prebleach value).  $F_{\infty}$  indicates the fluorescence signal to which the fluorescence signal recovers given by:  $y_0 + A_{\text{mono}}$  (expressed as % of the prebleach value). The error in  $F_{\infty}$  was calculated by summation of the errors in  $y_0$  and  $A_{\text{mono}}$ .  $F_m$  indicates the mobile fraction given by:  $[(F_{\infty} - F_0)/(F_i - F_0)]$ , with  $F_i$  being the prebleach fluorescence equaling 100%.

<sup>e</sup>Mathematical modeling: One (1) Angstrom (Å) equals  $1 \cdot 10^{-10}$  m. CBA, cristae-blocked area (fraction of total transecting area). See Results for further details.

*et al.*, 2020; Weissert *et al.*, 2021) we assumed in the model that (Appendix Fig S3A): (i) mitochondria contained regularly arranged cristae perpendicular to the longitudinal axis of the mitochondrion, (ii) the positions of the cristae alternated, with consecutive cristae being opposite of each other, (iii) cristae were equidistant, partially overlapping and of negligible thickness (Partikian *et al.*, 1998), and (iv) CBA equaled 0.95. The presence of cristae increased the effective length of the “channel” that connected the two ends of the mitochondrion thereby increasing FP diffusion length. In addition, the presence of cristae reduced the diffusive flow between consecutive mitochondrial subcompartments. Therefore, as indicated previously (Ölveczky & Verkman, 1998; Partikian *et al.*, 1998), FRAP was slower when more cristae were present (Appendix Fig S3B and C). Further details of the BD model are presented in the Appendix Supplementary Methods.

### Determining the $D_{\text{solvent}}$ value of mitochondria-targeted FPs

Confocal microscopy analysis of living FP-expressing cells yielded values for  $L_{\text{mito}}$  and  $R_{\text{mito}}$  of 3.42 and 0.262–0.281  $\mu\text{m}$ , respectively (Table 1). Similar  $R_{\text{mito}}$  values (0.252–0.255  $\mu\text{m}$ ) were obtained by electron microscopy (EM) analysis of fixed AcGFP1 and AcGFP1<sup>4</sup> cells (Table 1). EM quantification of the number of cristae yielded values of 5.620 cristae/ $\mu\text{m}$  (AcGFP1-expressing cells) and 5.462 cristae/ $\mu\text{m}$  (AcGFP1<sup>4</sup>-expressing cells). This reflects an average  $n_{\text{cristae}}$  value of 19 (Table 1) and an intercrista distance between 177 and 183 nm. The latter lies within a range of experimental values previously reported for HeLa cells (51–250 nm; Wilkens *et al.*, 2013; Stephan *et al.*, 2019; Wang *et al.*, 2019). Applying these experimental constraints, BD simulations were carried out using the following parameters (Table 1):  $L_{\text{mito}} = 3.42 \mu\text{m}$ ,  $R_{\text{mito}} = 0.270 \mu\text{m}$ ,

$n_{\text{cristae}} = 19$  and  $S_{\text{FRAP}} = 1.4 \mu\text{m}$ . Model output was determined for several values of  $D_{\text{solvent}}$  ( $0.5\text{--}50 \mu\text{m}^2/\text{s}$ ) to establish the relationship between  $T_{\text{mono}}$  and  $D_{\text{solvent}}$ . On a logarithmic scale, these parameters displayed a linear correlation (Fig 3D), allowing calculation of  $D_{\text{solvent}}$  for the experimental  $T_{\text{mono}}$  values (Fig 3E). This yielded values of  $23.9 \mu\text{m}^2/\text{s}$  (AcGFP1),  $11.8 \mu\text{m}^2/\text{s}$  (AcGFP1<sup>2</sup>),  $8.59 \mu\text{m}^2/\text{s}$  (AcGFP1<sup>3</sup>), and  $6.02 \mu\text{m}^2/\text{s}$  (AcGFP1<sup>4</sup>).

### The mitochondrial matrix solvent reduces FP mobility in a manner compatible with macromolecular crowding

The obtained  $D_{\text{solvent}}$  values (Fig 3E) reflect solvent-dependent FP diffusion in the mitochondrial matrix. To address our primary research question on macromolecular crowding, we first compared these values with empirical data sets of free 3D diffusion of globular biomolecules in aqueous media (Fig 4A; details are provided in Appendix Tables S2 and S3). The LOG10 ( $D_{\text{solvent}}$ ) value of these molecules decreased linearly as a function of their LOG10 (MW) value, with a slope of  $-0.36$  (Fig 4B). The latter is compatible with the theoretical proportionality of  $D_{\text{solvent}}$  with the molecular radius, and hence  $\text{MW}^{-0.33}$ , for globular molecules (Dross *et al*, 2009). Analysis of EGFP concatemer diffusion in aqueous solution suggested that these molecules display a globular conformation, that is, the open blue circles (Fig 4A) appear to be on the line fitted for the globular proteins (black symbols). However, the underlying experimental studies provided evidence that EGFP concatemers display an elongated molecular structure in aqueous solution (Pack *et al*, 2006; Vámosi *et al*, 2014). Therefore, we added the EGFP concatemers to the data set of the elongated molecules in aqueous solution (Fig 4A; open and filled blue symbols). For elongated molecules (Saxton, 2014),  $D_{\text{solvent}}$  decreased faster as a function of MW than for globular molecules (Fig 4A; black vs. blue line) and a slope of  $-0.72$  was found (Fig 4B). The latter is compatible with experimental data for elongated (i.e., supercoiled) plasmid DNA molecules in dilute aqueous solution where  $D_{\text{solvent}}$  is proportional to  $\text{MW}^{-0.66}$  (Prazeres, 2008). Quantification of EGFP concatemer diffusion in HeLa cell nuclei and cytosol yielded steeper slopes relative to aqueous solution (Fig 4A; open red squares, filled red circles, and Fig 4B; open red bars). These slopes were relatively close to the theoretical value for elongated molecules ( $-0.66$ ), suggesting that these EGFP concatemers displayed an elongated molecular structure. The latter was experimentally confirmed in the underlying studies (Pack *et al*, 2006; Dross *et al*, 2009). In case of mitochondrial matrix-targeted FPs, a slope of  $-0.98$  was obtained (Fig 4A; filled red squares, and Fig 4B; filled red bar). This decline was faster than for globular molecules in aqueous solution (2.7-fold), elongated molecules in aqueous solution (1.4-fold), elongated EGFP concatemers in the HeLa cell nucleus (1.3-fold), and elongated EGFP concatemers in HeLa cytosol (1.5-fold). Of note, the LOG10 ( $D_{\text{solvent}}$ ) value for AcGFP1<sup>4</sup> fell exactly on the fitted line (Fig 4A; filled red square for highest MW), supporting the validity of the applied  $T_{\text{mono}}$  correction (Fig 3B). Because the data points for the mitochondrial matrix-targeted FPs are not parallel to the “aqueous” lines for the globular and elongated molecules (Fig 4A and B), the steeper decline in  $D_{\text{solvent}}$  for the matrix-targeted concatemers cannot be explained by differences in solvent viscosity. The steeper decline is also not due to cristae-induced diffusion hindrance, since  $n_{\text{cristae}}$  was similar for AcGFP1- and AcGFP1<sup>4</sup>-expressing cells (Table 1) and our modeling

approach delivers cristae-independent  $D_{\text{solvent}}$  values. Integrating the above results, we conclude that the MW-dependent mobility reduction of AcGFP1 concatemers in the mitochondrial matrix is not only due to their elongated structure but also involves macromolecular crowding.

### Quantifying the viscosity of the mitochondrial matrix solvent and predicting FP structural conformation

To gain further insight into the structural conformation of the mitochondrial matrix-targeted FPs, we next determined mitochondrial matrix solvent viscosity ( $\eta_{\text{solvent}}$ ). To this end, we applied four empirical equations allowing prediction of  $\eta_{\text{solvent}}$  from  $D_{\text{solvent}}$  (Appendix Supplementary Methods): “Young” (Young *et al*, 1980), “He–Niemeyer” (He & Niemeyer, 2003), “Tyn–Gusek” (Tyn & Gusek, 1990), and “Stokes–Einstein” (Einstein, 1905; Sutherland, 1905; von Smoluchowski, 1906; Perrin, 1936). These equations also accounted for the effects of MW (Young, He–Niemeyer), radius of gyration ( $R_G$ ; He–Niemeyer, Tyn–Gusek), and hydrodynamic radius ( $R_H$ ; Stokes–Einstein) of the FPs. The MW of each concatemer was computed from its protein sequence (Appendix Table S1), whereas  $R_G$  and  $R_H$  were derived from structural information (see Table 1 and Fig EV1, and Appendix Supplementary Methods). In case of AcGFP1<sup>2</sup>, AcGFP1<sup>3</sup>, and AcGFP1<sup>4</sup>, two extreme conformations of minimal size (“compact”) and maximal size (“extended,” i.e., elongated) were considered (Fig EV1B–G). The Young equation, which is independent of FP conformation, predicted that  $\eta_{\text{solvent}}$  increased as a function of concatemer MW (Fig 4C; left panel). Similarly, when assuming that the FPs displayed a “compact” structural conformation also the He–Niemeyer, Tyn–Gusek and Stokes–Einstein equations predicted that  $\eta_{\text{solvent}}$  increased as a function of MW (Fig 4C; middle panel). By contrast, the predicted  $\eta_{\text{solvent}}$  values for AcGFP1<sup>2</sup>, AcGFP1<sup>3</sup>, and AcGFP1<sup>4</sup> were highly similar when assuming that these FPs displayed an “extended” structural conformation (Fig 4C; right panel). This strengthens our above conclusion that the FPs have an extended structure in the mitochondrial matrix solvent. The  $D_{\text{solvent}}$  value of AcGFP1 is the most reliable and easy-to-interpret predictor of  $\eta_{\text{solvent}}$  because AcGFP1-expressing cells display a single protein band (Fig 2B), and no assumptions regarding AcGFP1 structure are required (Fig EV1A). For AcGFP1 (Fig 4C; right panel) the He–Niemeyer, Tyn–Gusek, and Stokes–Einstein equations predicted  $\eta_{\text{solvent}}$  values between 3.69 and 4.57 cP (dotted lines). Taken together, these results support the conclusion that AcGFP1<sup>2</sup>, AcGFP1<sup>3</sup>, and AcGFP1<sup>4</sup> have an elongated structural conformation in the mitochondrial matrix and that the mitochondrial matrix fluid displays a three to five-fold higher viscosity than water.

### Chloramphenicol decreases the number of cristae, increases matrix electron density, and partially immobilizes matrix-targeted FPs

Although the above data provide evidence that FP diffusion in the mitochondrial matrix is reduced by macromolecular crowding, this effect appears to be relatively small. Therefore, we aimed to increase matrix macromolecular crowding levels by treating the cells with chloramphenicol (CAP), which inhibits the biosynthesis of mitochondrial DNA (mtDNA)-encoded OXPHOS subunits. The latter normally function as MIM-embedded binding platforms for



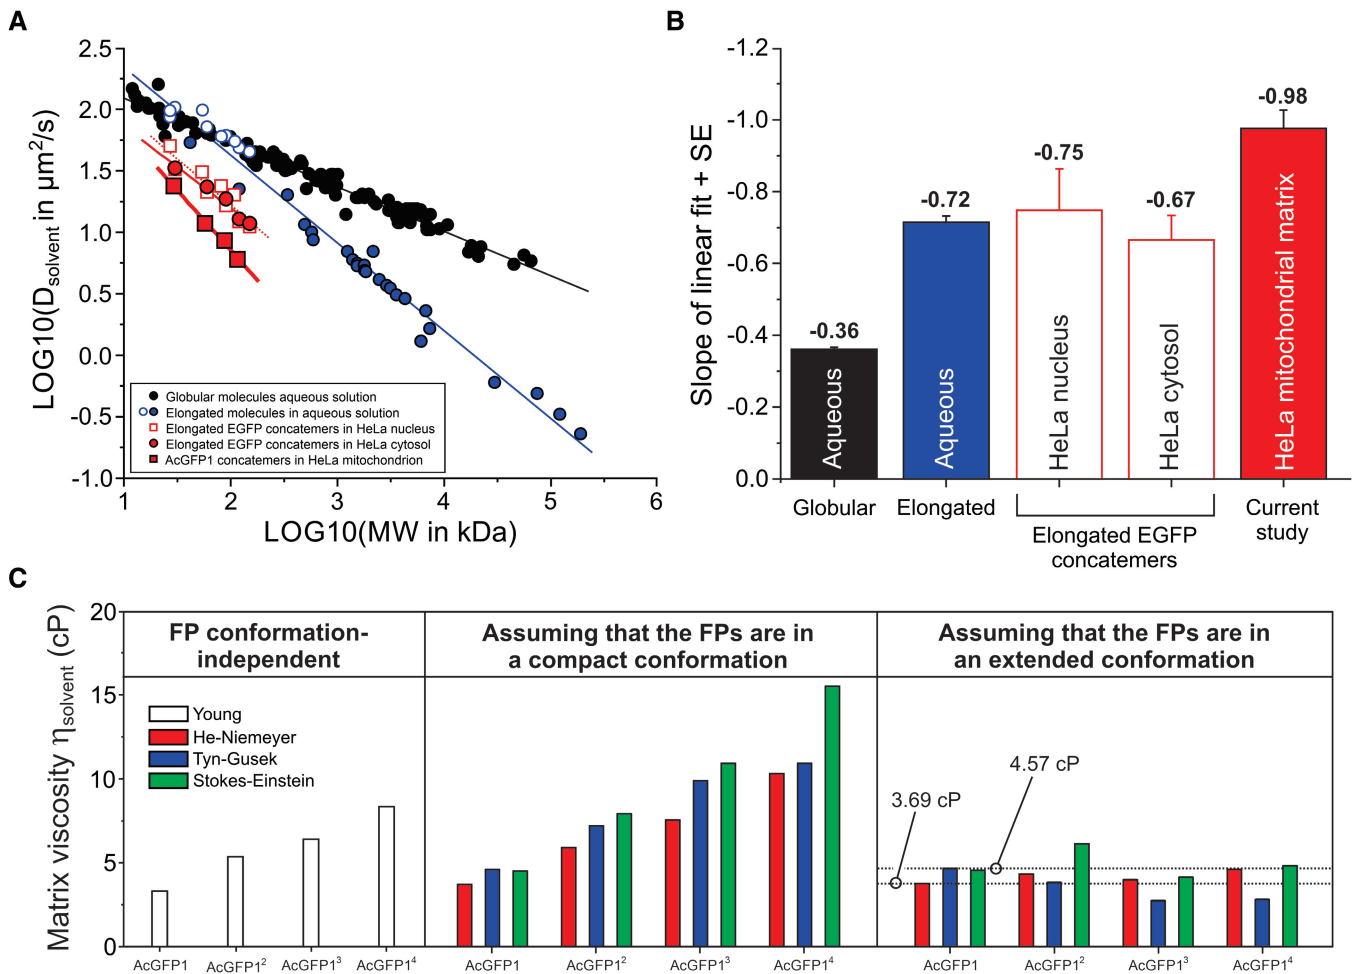

**Figure 4. Relationship between  $D_{\text{solvent}}$  and MW for the mitochondrial matrix-targeted fluorescent proteins, viscosity analysis and protein structure prediction.**

- A** Linear relationship between experimental  $D_{\text{solvent}}$  and MW values for various biomolecules in a double logarithmic plot. Data obtained in aqueous solution is separated into globular biomolecules (filled black symbols; continuous black line), elongated EGFP concatemers (open blue symbols; continuous blue line) and elongated biomolecules (filled blue symbols; continuous blue line). Red symbols reflect intracellular diffusion measurements with EGFP concatemers in HeLa cell nuclei (open red squares; dotted red line), EGFP concatemers in HeLa cytosol (filled red circles; continuous thin red line) and AcGFP1 concatemers in the mitochondrial matrix (filled red squares; continuous thick red line; current study). Full numerical data, fitting parameters using  $\text{LOG}_{10}(D_{\text{solvent}}) = A + B \cdot \text{LOG}_{10}(\text{MW})$  and background information are provided in Appendix Tables S2 and S3.
- B** Slopes of the linear fits depicted in panel (A) for the different classes of biomolecules measured in aqueous solution and intracellular compartments. Individual bars reflect mean  $\pm$  SE (standard error) values from the linear fit.
- C** The viscosity of the mitochondrial matrix solvent ( $\eta_{\text{solvent}}$ ) was calculated from the  $D_{\text{solvent}}$  values of the FPs using four empirical equations (Young, He–Niemeyer, Tyn–Gusek and Stokes–Einstein). This allowed the prediction of  $\eta_{\text{solvent}}$  as well as FP structural conformation (“compact” or “extended”; Fig EV1). The estimated  $\eta_{\text{solvent}}$  ranged between 3.69 and 4.57 cP. See Results for details.

nDNA-encoded OXPHOS subunits and/or assembly intermediates during OXPHOS biogenesis (Guerrero-Castillo *et al*, 2017; Hock *et al*, 2020). As such, CAP treatment induces the formation of stable subassemblies of mitochondrial CI with MWs of 170-, 67-, and 72-kDa (Guerrero-Castillo *et al*, 2017). Compositional analysis of these subassemblies demonstrated that the 72-kDa subassembly consisted of the NDUFV1 and NDUFV2 subunit. Previous analysis of mitochondrial matrix protein diffusion in HEK293 cells demonstrated that CAP treatment: (i) particularly increased the  $F_m$  of AcGFP1-tagged NDUFV1 subunits and/or NDUFV1-containing assembly intermediates, (ii) slowed the FRAP rate of AcGFP1 and AcGFP1<sup>2</sup>,

and (iii) did not slow the FRAP rate of the integral MIM protein adenine nucleotide translocase 1 (ANT1; Dieteren *et al*, 2011b). This demonstrates that NDUFV1 subunits and/or NDUFV1-containing subassemblies are not MIM-attached but diffusing in the mitochondrial matrix solvent. Considering the currently known mechanisms of OXPHOS biogenesis (Hock *et al*, 2020; Fernández-Vizcarra & Ugalde, 2022), it is to be expected that CAP treatment also increases the amount of nDNA-encoded subunits and/or assembly intermediates from other OXPHOS complexes (i.e., III, IV, and V) in the matrix solvent. CAP treatment did not alter mitochondrial dimensions and FP expression patterns (Table 1 and Appendix Fig S1B).

EM analysis demonstrated that the number of cristae/ $\mu\text{m}$  was  $\sim$ two-fold reduced (Fig 5A and B, and Table 1), compatible with previous studies in HeLa and HEK293 cells (Lenk & Penman, 1971; Kislev et al, 1973; Dieteren et al, 2011b). Moreover, the mitochondrial matrix was more electron-dense in CAP-treated cells (Fig 5C). The FRAP signal recovered slower, that is,  $T_{\text{mono}}$  was larger for all FPs in CAP-treated relative to untreated cells (Fig 5D and E, and Table 1). CAP treatment further induced a substantial decrease in  $F_m$  (Fig 5D and Table 1) and  $F_{\infty}$  (i.e., the predicted FP fluorescence intensity at  $t = t_{\infty}$ ; Fig 5F), in particular for AcGFP1<sup>2</sup> and AcGFP1<sup>3</sup>. By contrast, CAP treatment was much less effective in reducing  $T_{\text{mono}}$ ,  $F_m$ , and

$F_{\infty}$  for AcGFP1<sup>4</sup>, compatible with the detected fluorescent degradation product of smaller MW (Appendix Fig S1B). CAP-treated AcGFP1<sup>2</sup>- and AcGFP1<sup>3</sup>-expressing cells displayed a substantial decrease in  $F_m$  and  $F_{\infty}$ , which could not be quantitatively reproduced by the BD simulation model (Appendix Fig S3). In light of the above, prediction of  $D_{\text{solvent}}$  values for AcGFP1<sup>2</sup>, AcGFP1<sup>3</sup>, and AcGFP1<sup>4</sup> using BD simulations was not possible. However, AcGFP1 displayed  $T_{\text{mono}}$  and  $F_m$  values that were still reasonably compatible with BD simulations, predicting a  $D_{\text{solvent}}$  of 2.91  $\mu\text{m}^2/\text{s}$  for an experimental  $n_{\text{cristae}}$  value of 9 (Table 1; Appendix Fig S3C and D). This predicted an  $\eta_{\text{solvent}}$  value between 27.3 and 37.5 cP (Fig 5G

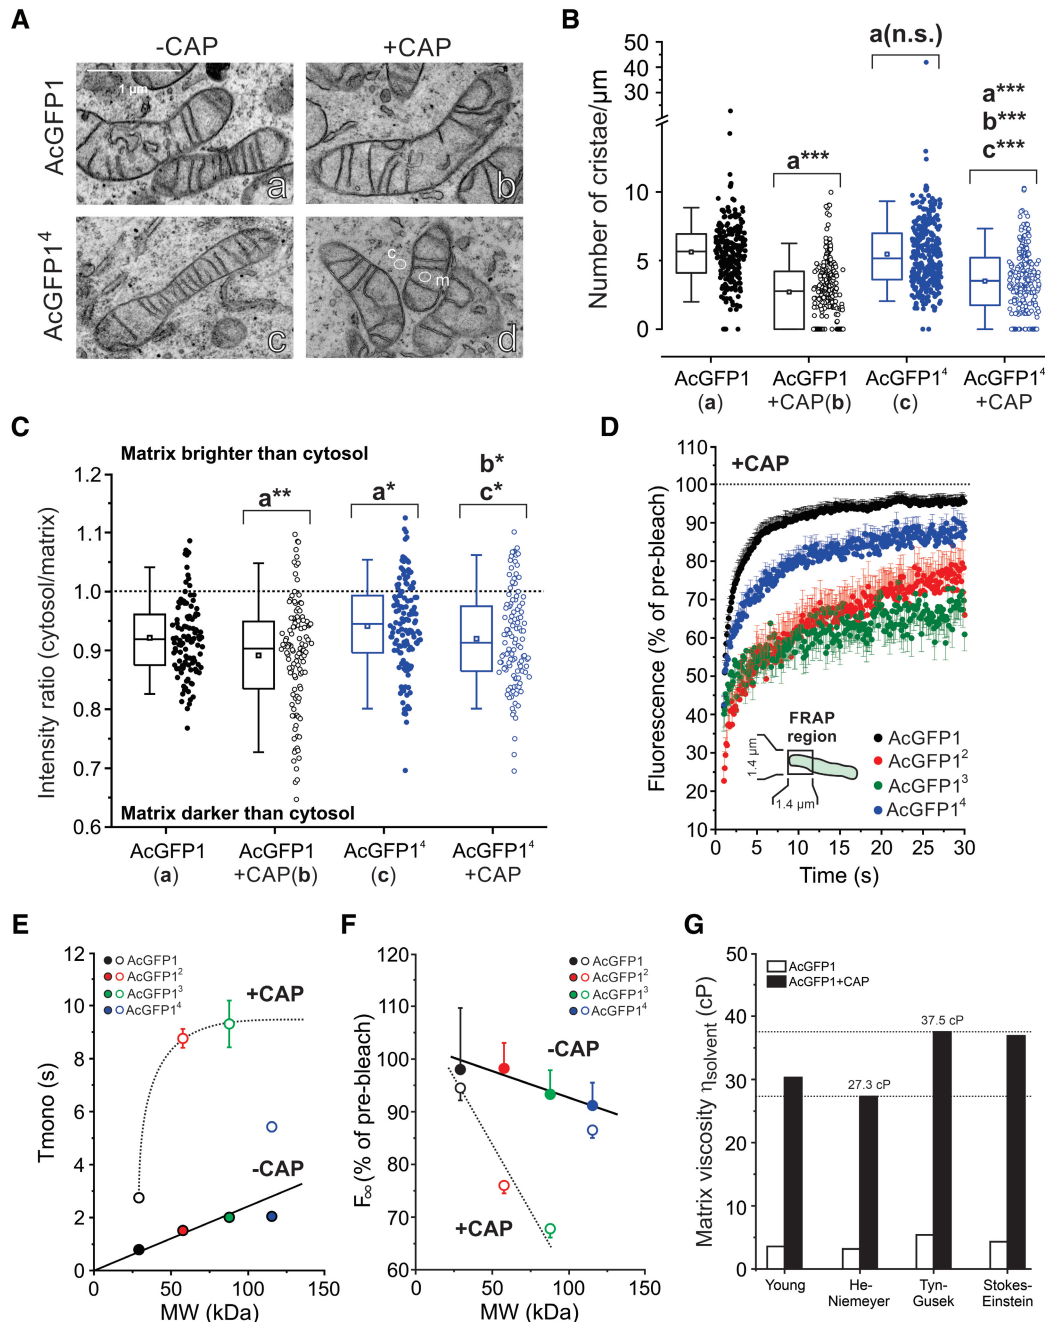

Figure 5.

**Figure 5. Chloramphenicol decreases the number of cristae, increases matrix electron density, reduces the mobility of mitochondrial matrix-targeted fluorescent proteins and increases matrix viscosity.**

- A Transmission electron microscopy (EM) images of AcGFP1 and AcGFP1<sup>4</sup>-expressing HeLa cells cultured in the absence and the presence of chloramphenicol (CAP). Images were contrast-optimized to better visualize cristae. Cytosolic and mitochondrial regions of interest typically used for electron density analysis (panel C) are marked by “c” and “m,” respectively.
- B Effect of CAP on the average number of cristae/μm calculated by dividing the number of cristae by the mitochondrial length for individual mitochondria. Data was obtained in *N* = 2 independent EM experiments for *n* = 244 mitochondria (AcGFP1), *n* = 295 (AcGFP1 + CAP), *n* = 314 (AcGFP1<sup>4</sup>) and *n* = 259 (AcGFP1<sup>4</sup> + CAP).
- C Effect of CAP on the electron density of the mitochondrial matrix quantified from EM images (original images were used). The y-axis depicts the intensity ratio between a cytosolic region of interest (ROI; e.g., panel A-d, marked “c”) and a close by ROI in the mitochondrial matrix (e.g., panel A-d, marked “m”). Equal intensities of these ROIs are marked by the dotted line. Only mitochondria with clearly visible cristae (i.e., that were fully within the EM section) were included (*N* = 2 independent experiments) from *n* = 112 mitochondria (AcGFP1), *n* = 119 (AcGFP1 + CAP), *n* = 134 (AcGFP1<sup>4</sup>) and *n* = 116 (AcGFP1<sup>4</sup> + CAP).
- D Average FRAP curves (mean ± SEM) for mitochondrial matrix-targeted FPs in the presence of CAP (Table 1). Data was obtained in at least *N* = 3 independent experiments for *n* = 40 mitochondria (AcGFP1 + CAP), *n* = 24 (AcGFP1<sup>2</sup> + CAP), *n* = 26 (AcGFP1<sup>3</sup> + CAP) and *n* = 33 (AcGFP1<sup>4</sup> + CAP).
- E Relationship between MW and *T*<sub>mono</sub> in the absence of CAP (–CAP; data taken from Fig 3B) and in the presence of CAP (+CAP; curve manually drawn). Symbols and error bars reflect mean ± SE (standard error) values from the mono-exponential fit. For data points without error bar, the latter fell within the size of the symbol.
- F Same as panel (E) but now for the relationship between MW and the fluorescence intensity (*F*<sub>∞</sub>) of the FPs by extrapolating the fitted exponential recovery to *t* = *t*<sub>∞</sub> (lines manually drawn). Symbols and error bars for *F*<sub>∞</sub> reflect mean ± SEM and were computed from the mono-exponential fit parameters as described in Table 1.
- G Impact of CAP on the solvent-dependent viscosity (*η*<sub>solvent</sub>) of the mitochondrial matrix fluid determined using the *D*<sub>solvent</sub> values of AcGFP1 (see Results for details). The estimated *η*<sub>solvent</sub> ranged between 27.3 and 37.5 cP.

Data information: In panels (B and C) each symbol represents an individual mitochondrion, error bars mark the 95% (upper) and 5% (lower) percentile, the boundary boxes mark the 75% (upper) and 25% (lower) percentile, the square marks the mean value of the data, and the horizontal line within the box indicates the median value of the data. Data in panel (B and C) was compared using an independent Student's *t*-test and significant differences are indicated by \**P* < 0.05, \*\**P* < 0.01, \*\*\**P* < 0.001 between the marked conditions (a–c). Not significant is marked by n.s. The exact *P*-values for panel (B) were: AcGFP1 (a) vs. AcGFP1 + CAP (b): *P* = 1.894·10<sup>−40</sup>; AcGFP1 (a) vs. AcGFP1<sup>4</sup> + CAP: *P* = 1.458·10<sup>−22</sup>; AcGFP1 + CAP (b) vs. AcGFP1<sup>4</sup> + CAP: *P* = 4.846·10<sup>−5</sup>; AcGFP1<sup>4</sup> (c) vs. AcGFP1<sup>4</sup> + CAP: *P* = 2.725·10<sup>−16</sup>. The exact *P*-values for panel (C) were: AcGFP1 (a) vs. AcGFP1 + CAP (b): *P* = 0.00545; AcGFP1 (a) vs. AcGFP1<sup>4</sup> (c): *P* = 0.0348; AcGFP1 + CAP (b) vs. AcGFP1<sup>4</sup> + CAP: *P* = 0.0142; AcGFP1<sup>4</sup> (c) vs. AcGFP1<sup>4</sup> + CAP: *P* = 0.0366.

and Table 1). Collectively, our FRAP analysis of CAP-treated cells demonstrates that mitochondrial matrix-targeted FPs become progressively immobilized as a function of MW, associated with an eightfold increase in *η*<sub>solvent</sub>. These phenomena are compatible with increased macromolecular crowding.

**Chloramphenicol impairs mitochondrial function, but neither induces the mitochondrial unfolded protein response, not alters mtDNA copy number and mitochondrial fission/fusion protein levels**

Evidence in the literature suggests that both DOX and CAP inhibit mitochondrial function, thereby potentially inducing the mitochondrial unfolded protein response (UPR<sup>mt</sup>; Houtkooper *et al*, 2013; Moullan *et al*, 2015; Shpilka & Haynes, 2018). The latter is classically linked to the accumulation of misfolded proteins in the mitochondrial matrix, which could hinder FP diffusion in our experiments by increasing macromolecular crowding. In case of DOX, cellular oxygen consumption rate (OCR) was not reduced (Appendix Supplementary Results and Fig EV2A–C) and the levels of proteinaeous UPR<sup>mt</sup>-linked markers (LONP1, mtHSP70, mtHSP60, CLPP, and CHOP) were not affected (Figs EV2E, and EV3A and B). This makes it unlikely that DOX treatment induces mitochondrial dysfunction and UPR<sup>mt</sup> in our experiments. CAP treatment greatly reduced OCR values and increased extracellular acidification rate (ECAR), potentially suggesting induction of a glycolytic switch (Schmidt *et al*, 2021; Bulthuis *et al*, 2022; Divakaruni & Jastroch, 2022). Further analysis demonstrated that CAP-treated cells do not display UPR<sup>mt</sup> activation (Appendix Supplementary Results and Fig EV2A–C) and exhibit lower and higher TMRM fluorescence signals in the nucleus and mitochondrion, respectively (Appendix Supplementary Results and Fig EV2D). The latter suggests that CAP induces mitochondrial membrane potential ( $\Delta\psi$ )

hyperpolarization. FP diffusion might potentially be altered by changes in mtDNA organization and the function of the mitochondrial MIM fusion protein Optic Atrophy 1 (OPA1). However, no CAP-induced changes in mtDNA copy number and expression of mitochondrial fission/fusion proteins were detected (Appendix Supplementary Results, and Fig EV2F and G). The latter is compatible with CAP not altering mitochondrial length and diameter. Taken together, these results suggest that the progressive FP immobilization observed in CAP-treated cells is neither caused by UPR<sup>mt</sup> induction nor by alterations in the level of mtDNA and mitochondrial fission/fusion proteins. This supports our conclusion that CAP treatment affects FP mobility by increasing macromolecular crowding.

## Discussion

The primary aim of this study was to determine whether the mitochondrial matrix solvent displays macromolecular crowding. To this end, we studied the diffusional behavior of four inert monomeric FPs of increasing MW in the mitochondrial matrix of HeLa cells in the absence and presence of CAP. Mitochondrial FP fluorescence intensity per cell decreased as a function of concatemer MW (Fig 2C) and correlated well with in-gel fluorescence signals (Fig 2D). This strongly suggests that the latter signals faithfully reflect the cellular situation and that AcGFP1 concatemers are not denatured during mitochondrial isolation. Similar to the current findings, the fluorescence signal and expression of nucleus-targeted EGFP concatemers (containing up to 12 monomers) decreased as a function of MW in H1299 cells (Böhm *et al*, 2017). The latter study also demonstrated the presence of minor amounts of fluorescent degradation products of smaller MW. Similarly, expression of EGFP concatemers in *Escherichia coli* cytoplasm (containing up to eight monomers) was paralleled with the formation of degradation

products of smaller MW (Nenninger *et al*, 2010). By contrast, FP concatemers of up to four EGFP molecules remained intact when expressed in the nucleus of HeLa cells (Dross *et al*, 2009), whereas concatemers of up to five EGFP molecules remained intact in the cytosol of HEK293 cells (Pack *et al*, 2006). Inspection of MW marker positions (Appendix Fig S1A and B) revealed that AcGFP1-expressing cells contained a single fluorescent product with an estimated MW between 25 and 37 kDa (predicted: 29-kDa; Table 1). The fluorescent product in AcGFP1<sup>2</sup>-expressing cells displayed an MW between 37 and 50 kDa (predicted: 58-kDa). For AcGFP1<sup>3</sup> a product of 50–75 kDa was observed (predicted: 88-kDa). In case of AcGFP1<sup>4</sup> (predicted: 115-kDa), two fluorescent products with MWs between 37 and 50 kDa (smaller product) and 75–100 kDa (larger product) were detected. With the exception of AcGFP1, these data highlight a discrepancy between the marker-reported MW of the FPs and their predicted MW. This is probably due to the fact that the structural dimensions of the FPs, which co-determine gel migration distance, scale differently with their MW than for the MW markers. Moreover, SDS binding to the various FPs might be different, since samples were not heated (to prevent FP fluorescence loss), thereby affecting their migration behavior. In this context, our SDS-PAGE analysis suggests that the smaller fluorescent product in AcGFP1<sup>4</sup>-expressing cells is similar to AcGFP1<sup>2</sup>. This might indicate that AcGFP1<sup>4</sup>, once imported in the mitochondrial matrix, is cleaved by a mitochondrial protease at the position of its 2<sup>nd</sup> linker (DIPHPA-FLYKVVDDPPV; Appendix Table S1). However, an identical linker connected the 1<sup>st</sup> and 2<sup>nd</sup> AcGFP1 monomer within AcGFP1<sup>3</sup> but no fluorescent breakdown product was detected. This suggests that the size and/or MW of AcGFP1<sup>4</sup> is responsible for its partial breakdown within mitochondria, in both the presence and absence of CAP.

### Viscosity of the mitochondrial matrix solvent in the absence of CAP

Analysis of AcGFP1 experiments predicted a  $D_{\text{solvent}}$  of 23.9  $\mu\text{m}^2/\text{s}$  (Fig 3E). This is within the range of previous FP-employing FRAP and fluorescence correlation spectroscopy (FCS) studies (Partikian *et al*, 1998; Verkman, 2002; Koopman *et al*, 2007, 2008b; Dieteren *et al*, 2011a). Free EGFP in aqueous solution displayed a  $D_{\text{solvent}}$  value between 87 and 104  $\mu\text{m}^2/\text{s}$  (Appendix Table S2). This means that the  $D_{\text{solvent}}$  of AcGFP1 is between 3.6- and 4.4-fold lower in the mitochondrial matrix than in aqueous solution. As a consequence, computed matrix  $\eta_{\text{solvent}}$  values were between 3.69 and 4.57 cP (Fig 4C), being three to five-fold higher than pure water and similar to those observed previously in HEK293 cells (Dieteren *et al*, 2011a) and *E. coli* cytoplasm (Chen *et al*, 2018). In the literature, mitochondrial matrix viscosity was also analyzed using viscosity-sensitive fluorescent rotor molecules (Xiao *et al*, 2021; Yin *et al*, 2021). In the case of HeLa cells, these studies reported heterogeneous and relatively high viscosity values between 20.7 and 275 cP (Yang *et al*, 2013; Jiménez-Sánchez *et al*, 2018; Ren *et al*, 2018, 2020; Steinmark *et al*, 2019). Similarly, variable high mitochondrial viscosity values between < 100 and > 900 cP were reported in rat hepatic tissue slices (Liu *et al*, 2018), whereas COS7 cells displayed a viscosity value of 325 cP, measured with a BODIPY-HaloTag rotor molecule targeted to mitochondria using the mitochondrial Cox8a targeting sequence (Chambers *et al*, 2018). It is currently unknown why the rotor-based viscosity values exceed those reported in the

current study and earlier FP-based research (Partikian *et al*, 1998; Verkman, 2002; Koopman *et al*, 2007, 2008b; Dieteren *et al*, 2011a). Potentially, the observed discrepancy in cP values could be due to the BODIPY and/or TPP<sup>+</sup>-containing part of the rotors displaying a (transient) physical or electrochemical interaction with the inside-negative MIM. In this context, and to the best of our knowledge, there is currently no information regarding the translational mobility of these rotors in the mitochondrial matrix. Therefore, the rotor properties in the mitochondrial matrix might differ from those in solution, meaning that the viscosity reporting behavior of the sensor is altered (Puchkov, 2013; Chen *et al*, 2018). This hypothesis is supported by the observation that some of the rotor-reported matrix viscosities are close to that of the MIM (i.e., 900–950 cP; Chazotte & Hackenbrock, 1988) and that a plasma membrane-directed BODIPY-based rotor-reported viscosity values between 270 and 380 cP (Kubankova *et al*, 2019). This means that the rotor-reported mitochondrial matrix viscosity values are similar to those of the plasma membrane, which is unrealistic. It was further argued that accurate viscosity analysis with BODIPY-C<sub>10</sub>-based probes requires calibration in the same polarity environment as the sample of interest and that the size of the surrounding molecules should not exceed that of BODIPY-C<sub>10</sub> (Polita *et al*, 2020). We here demonstrate that CAP-induced impairment of mitochondrial function is associated with an eightfold increase in  $\eta_{\text{solvent}}$  (Fig 5G). Therefore, differences in rotor- and FP-reported matrix viscosities might also be due to inter-study differences in mitochondrial functional state.

### Evidence for matrix macromolecular crowding in the absence of CAP

Applying empirical relationships, we provided evidence that AcGFP1<sup>2</sup>, AcGFP1<sup>3</sup> and AcGFP1<sup>4</sup> display an elongated (structurally extended) conformation in the mitochondrial matrix solvent (Fig 4C). Similarly, EGFP concatemers displayed an elongated structure in the nucleus and cytosol of HeLa cells (Pack *et al*, 2006; Dross *et al*, 2009). This is compatible with the behavior of single DNA molecules in nanochannels, which displayed an elongated structure at low crowding levels but, when exceeding a certain volume fraction of the crowding agent, condensed into a compact form (Zhang *et al*, 2009). Interestingly, analyzing the dependency of  $D_{\text{solvent}}$  on MW revealed a steeper linear decline for matrix-targeted FPs, than for globular/elongated molecules in aqueous solution and elongated EGFP concatemers in the nucleus/cytoplasm of HeLa cells (Fig 4B). This means that the elongated structure of the matrix-targeted FPs cannot fully explain the steeper decline. In addition, our BD modeling approach renders  $D_{\text{solvent}}$  cristae-independent and both  $F_m$  and  $F_\infty$  increased as a function of MW (Table 1 and Fig 5F). Therefore, we conclude that matrix FP mobility is reduced by the combined impact of their elongated structure and macromolecular crowding. This latter probably is low level, since substantial crowding is associated with molecule compaction (Zhang *et al*, 2009; Kuznetsova *et al*, 2014).

### CAP treatment slows solute diffusion and increases mitochondrial matrix viscosity

Triggered by our previous findings (see Results), cells were treated with CAP to increase the protein concentration of the matrix



solvent. Although technical limitations prevented assessing  $D_{\text{solvent}}$  for AcGFP1<sup>2</sup>, AcGFP1<sup>3</sup>, and AcGFP1<sup>4</sup>, analysis of AcGFP1 mobility demonstrated that CAP treatment eightfold decreased and increased  $D_{\text{solvent}}$  and  $\eta_{\text{solvent}}$ , respectively (Table 1 and Fig 5G). By itself, this viscosity increase is highly relevant, since it will slow down any diffusion-limited process, including metabolite diffusion and macromolecular association/dissociation reactions (Van den Bogaart et al, 2007; Molines et al, 2022). Mitochondria in CAP-treated cells displayed a progressive immobilization of AcGFP1<sup>2</sup> and AcGFP1<sup>3</sup> (Fig 5D–F), contained three to five-fold cristae and displayed a more electron-dense matrix (Fig 5C). This strongly suggests that matrix macromolecular crowding is increased in CAP-treated cells (Mika et al, 2010; Mittal et al, 2015; Delarue et al, 2018; Junker et al, 2019). Electron density analysis was performed on EM images of osmium tetroxide-treated samples, which preferentially binds to unsaturated fatty acids (Belazi et al, 2009). However, it appears that osmium tetroxide also can react with proteins (e.g., Porter & Kallman, 1953) and that electron density increases when proteins with a relatively high affinity for this fixative are present (Bisht et al, 2016). In this context, it has been argued that differences in electron density of cryo-electron tomograms can be interpreted as differences in macromolecular density and that mitochondrial matrices are expected to display a higher density than the surrounding cytoplasm (Ader et al, 2019). Therefore, we propose that the increased electron density in CAP-treated cells (Fig 5C) represents a minor though significant increase in the concentration of soluble matrix macromolecules. This conclusion is supported by the fact that mitochondria in AcGFP1<sup>4</sup>-expressing cells displayed a lower fluorescent signal (Fig 2B–D), as well as a less electron-dense matrix relative to AcGFP1<sup>3</sup>-expressing cells (Fig 5C). Compatible with a previous study in CAP-treated mouse embryonic fibroblasts (Sasaki et al, 2020), CAP-treated HeLa cells lacked a detectable increase in proteinaceous UPR<sup>mt</sup>-linked markers (Figs EV2E and EV3). Although this suggests that the increase in matrix protein levels is relatively small, such an increase can substantially elevate macromolecular crowding levels due to the relatively small matrix volume.

### CAP treatment does not induce mitochondrial orthodox-to-condensed transition

Classically, changes in matrix electron density are linked to alterations in mitochondrial bioenergetic state during mitochondrial “orthodox-to-condensed transition” (Hackenbrock, 1966, 1972). Orthodox mitochondria are characterized by a low OCR,  $\Delta\psi$  hyperpolarization and a relatively large matrix volume, whereas condensed mitochondria display a high OCR and a relatively small matrix volume (Perkins & Ellisman, 2011). During orthodox-to-condensed transition, matrix volume decrease is accompanied by an increase in electron density without alterations in total mitochondrial volume (Hackenbrock, 1966). In CAP-treated cells, mitochondria displayed functional properties typical of orthodox mitochondria (i.e., a low OCR and  $\Delta\psi$  hyperpolarization; Fig EV2A–D) but a more electron-dense (darker) matrix (typical of condensed mitochondria; Fig 5C). Although CAP did reduce the number of cristae, mitochondrial dimensions and volume were not detectably affected (Table 1). With respect to CAP-induced  $\Delta\psi$  hyperpolarization, we observed that mitochondrial TMRM fluorescence was increased, whereas nucleoplasmic TMRM fluorescence was

decreased. Since TMRM accumulates in the cytoplasm and mitochondrial matrix according to the plasma membrane and MIM electrical potential, respectively, this suggests that  $\Delta\psi$  is more negative (Koopman et al, 2008a). Similarly, CAP pretreatment (48 h) induced  $\Delta\psi$  hyperpolarization in HepG2 cells, as reported by fluorescence analysis of mitochondrial DiOC<sub>6</sub> accumulation (Li et al, 2005). However, when the rotational motion of fluorescent molecules is impeded their fluorescence quantum yield might increase (Dragan et al, 2014; Vyšniauskas et al, 2015). Therefore, it cannot be ruled out that the increased mitochondrial TMRM fluorescence signal in CAP-treated cells is due to a higher viscosity/crowding environment within the mitochondrial matrix. Taken together, our results indicate that CAP treatment might hyperpolarize  $\Delta\psi$  and does not induce mitochondrial orthodox-to-condensed transition.

### Predicting the degree of macromolecular crowding and volume exclusion in the mitochondrial matrix

As stated above, macromolecular crowding will reduce the translational mobility of solutes with a similar or larger size than the crowder to a greater extent than the mobility of smaller solutes. Therefore, to gain some theoretical insight into how CAP might quantitatively affect matrix crowding levels, we analyzed the predicted effect of human serum albumin (HSA) as a model crowding protein (Appendix Supplementary Results). HSA was selected because its MW ( $\approx$ 92-kDa) is relatively close to that of the expected NDUFV1/NDUFV2 assembly intermediates, potentially acting as (co)crowders (see Results), and similar to the MW of AcGFP1<sup>3</sup> ( $\approx$ 88-kDa), which was demonstrated to be substantially immobilized in CAP-treated cells. Using the obtained  $\eta_{\text{solvent}}$  values, and assuming that HSA is the sole crowding entity, it was predicted that HSA would occupy between  $\sim$ 20% (absence of CAP) and  $\sim$ 33% (presence of CAP) of the total mitochondrial matrix volume (Appendix Supplementary Results and Fig 6A). Obviously, the magnitude of this volume exclusion effect will increase with the number/size of the crowding macromolecules and with decreasing matrix volume.

### Summary and conclusion

The results presented in this study support the conclusion that the mitochondrial matrix solvent displays macromolecular crowding phenomena, particularly during conditions of CAP-induced mitochondrial dysfunction. In analogy to the cytosol (Delarue et al, 2018), it is therefore likely that (changes in) matrix crowding will induce molecular sieving effects that will affect matrix bioreactions dependent on the size of the involved crowding molecules and reactants. It is expected that macromolecular crowding will decrease the rate of diffusion-limited, fast association reactions whereas it will increase this rate for slow, transition-state-limited association reactions (Zhou et al, 2008). Therefore, crowding impacts on complex formation, surface binding, aggregation and folding/compaction of matrix proteins and, via volume exclusion, on the diffusion and (local) concentration of metabolites, ions, and other small reactants (Minton, 1990; Yu et al, 2016; Andrews, 2020). Crowding-induced effects on the Michaelis–Menten mechanism were predicted *in silico* (Weilandt & Hatzimanikatis, 2019) and demonstrated experimentally for the mitochondrial matrix enzymes malate hydrogenase

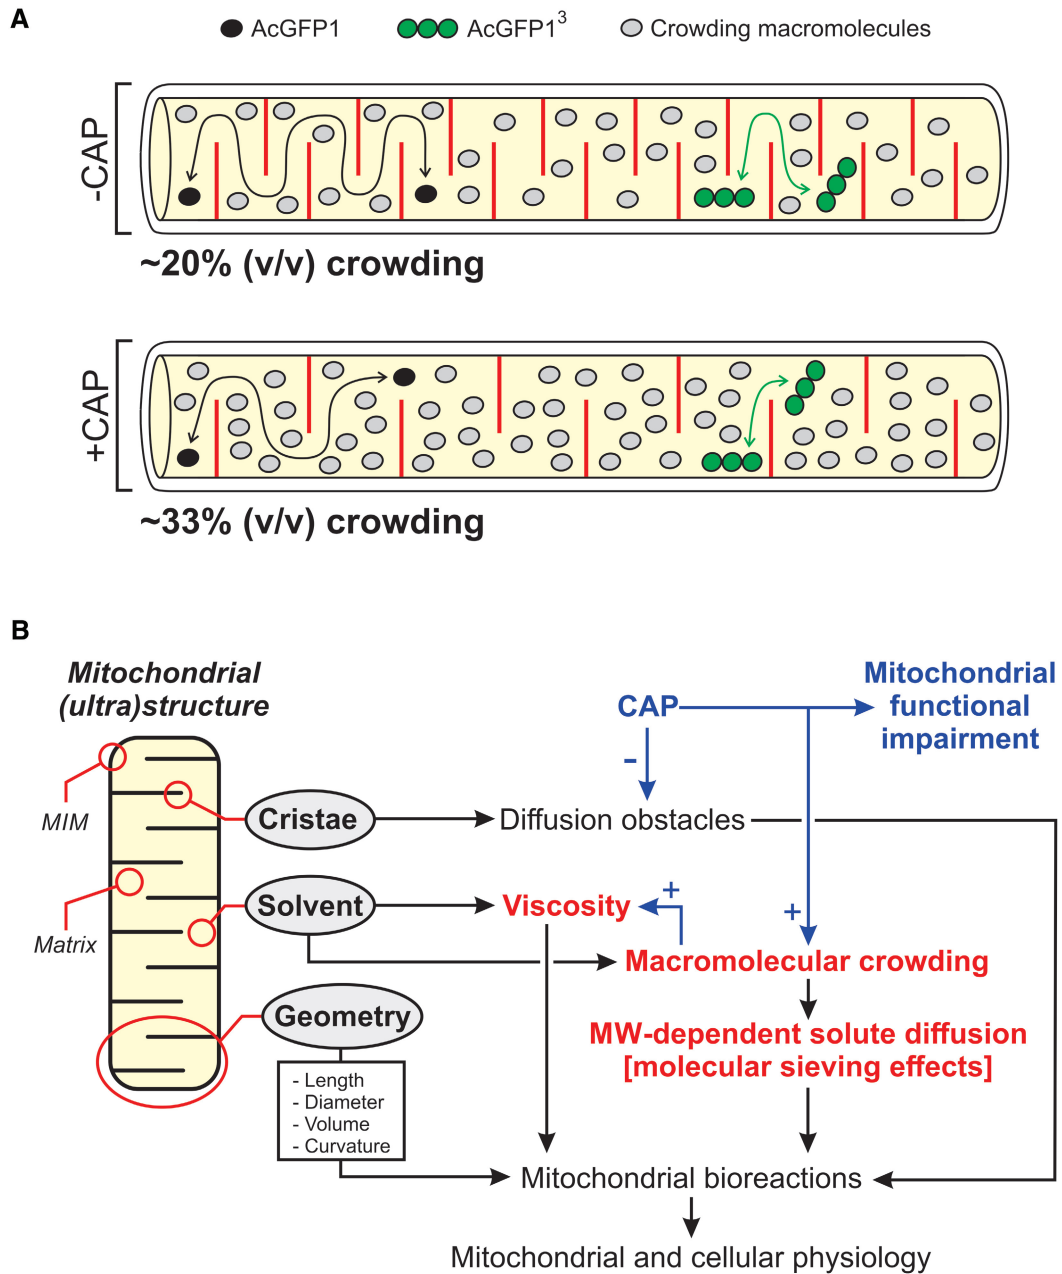

**Figure 6. Key results and interplay between mitochondrial (ultra)structure, matrix solvent macromolecular crowding/viscosity and mitochondrial function.**

A Graphical representation (not to scale) of the key results of this study, illustrating the hindrance effect of cristae (red lines) and crowding macromolecules (gray symbols) on the mobility of AcGFP1 (black symbols) and AcGFP1<sup>3</sup> (green symbols) in the mitochondrial matrix (yellow). In the absence of chloramphenicol (–CAP), low levels of macromolecular crowding reduce the mobility of AcGFP1<sup>3</sup> to a greater extent than the mobility of AcGFP1. In the presence of CAP (+CAP), the number of cristae is reduced but crowding is increased. This impedes the mobility of AcGFP1 and AcGFP1<sup>3</sup>, although the latter is affected to a greater extent. In this panel, the number of crowding macromolecules approximately reflects the predicted maximal degree of crowding determined using human serum albumin (HSA) as a model crowder (see Discussion).

B Integration of mitochondrial morphofunction. The mitochondrial matrix is surrounded by the mitochondrial inner membrane (MIM), which contains matrix-protruding folds (cristae). Biochemical reactions in the mitochondrial matrix are affected by hindrance of solute diffusion by cristae, the physicochemical properties of the mitochondrial matrix solvent (e.g., viscosity) and the geometry of the mitochondrial compartment (e.g., volume). We here demonstrate that the mitochondrial matrix solvent can reduce the diffusion of fluorescent proteins in an MW-dependent manner typical of macromolecular crowding. The latter appeared only minor during “normal” conditions but increased during CAP-induced mitochondrial functional impairment. We propose that crowding-induced molecular sieving effects, in combination with alterations in matrix solvent viscosity, impact on mitochondrial bioreactions and thereby on mitochondrial and cellular physiology.

(Poggi & Slade, 2015) and citrate synthase (Wilcox *et al*, 2020). We hypothesize that alterations in mitochondrial matrix crowding level, cristae number/architecture, and/or mitochondrial geometry exert control over mitochondrial bioreactions, which exemplifies the intricate link between mitochondrial (ultra)structure and function (Fig 6B). In this sense, the combined crowding and cristae-induced hindrance of matrix  $\text{Ca}^{2+}$  diffusion might be involved in heterogeneous spreading of mitochondrial  $\text{Ca}^{2+}$  signals (Gerencser & Adam-Vizi, 2005) and compartmentalization of matrix reaction networks (Kekenes-Huskey *et al*, 2015).

## Materials and Methods

### Generation of inducible HeLa cell lines

HeLa T-REX Flp-in cell lines stably expressing mitochondria-targeted concatemers of monomeric AcGFP1 (AcGFP1<sup>1</sup>, AcGFP1<sup>2</sup>, AcGFP1<sup>3</sup>, and AcGFP1<sup>4</sup>) were generated as described in the [Appendix Supplementary Methods](#) and cultured at 37°C in a humid atmosphere (95% air, 5% CO<sub>2</sub>). Expression of these fluorescent proteins (FPs) was induced by adding 1 µg/ml doxycycline (DOX) to the culture medium for 24 h. In certain experiments, cells were treated with 40 µg/ml chloramphenicol (CAP) for 72 h.

### Mitochondrial staining and flow cytometry

Localization of the FPs and the mitochondrial marker MitoTracker Red CM-H<sub>2</sub>XROS was visualized using confocal microscopy. Flow cytometry was applied to analyze the cellular fluorescence intensity of the AcGFP1 concatemers and forward scatter. Details are provided in the [Appendix Supplementary Methods](#).

### Fluorescence recovery after photobleaching (FRAP) analysis

Mitochondrial FRAP experiments were performed as described previously (Dieteren *et al*, 2008, 2009, 2011a, 2011b). Details are provided in the [Appendix Supplementary Methods](#).

### Western blotting

Mitochondrial fractions or whole-cell lysates were used for SDS-PAGE, in-gel fluorescence analysis, and Western blotting as described in the [Appendix Supplementary Methods](#).

### Electron microscopy (EM)

Electron microscopy was performed as described previously (Koopman *et al*, 2008a). Details are provided in the [Appendix Supplementary Methods](#).

### Functional cell analysis

Oxygen consumption rates (OCR) and extracellular acidification rates (ECAR) were quantified using a Seahorse XFe96 flux Analyzer (Agilent, Santa Clara, CA, USA). Mitochondrial membrane potential ( $\Delta\psi$ ) was analyzed using the fluorescent cation TMRM (tetramethylrhodamine methyl ester). Mitochondrial DNA (mtDNA) copy number

was quantified using real-time quantitative PCR (qPCR) analysis. Details are provided in the [Appendix Supplementary Methods](#).

### Numerical simulations

A Brownian dynamics (BD) computer model was developed to determine the solvent-dependent diffusion constant ( $D_{\text{solvent}}$ ) of the AcGFP1 concatemers. This model was constrained by experimental data and implemented in GNU Fortran (<https://gcc.gnu.org>) under Ubuntu 20.04 LTS (<https://releases.ubuntu.com>). Details are provided in the [Results](#) section and in the [Appendix Supplementary Methods](#).

### Image analysis

Image visualization, processing, and quantification were carried out using Image Pro Plus software (Media Cybernetics, Rockville, MD, USA), Zeiss LSM 510 Meta software (Carl Zeiss AG, Oberkochen, Germany) and FIJI (<https://imagej.net/Fiji>).

### Statistical analysis

Curve fitting and statistical analyses were performed using Origin Pro software (Originlab Corp., Northampton, MA, USA). Levenberg–Marquardt and least squares algorithms were used for nonlinear and linear regression, respectively. Average data were expressed as mean ± SEM (standard error of the mean), and significance was tested using an independent Student's *t*-test unless stated otherwise.

## Data availability

Source data, materials, and computer code are available from the corresponding authors at reasonable request. All other data are contained in the main manuscript, Expanded View and Appendix. This study includes no data deposited in external repositories.

**Expanded View** for this article is available [online](#).

### Acknowledgements

We thank Stephen S. Taylor (Division of Cancer Sciences, University of Manchester, UK) for providing the parental HeLa T-REX Flp-in cells, Michael J. Saxton (Department of Biochemistry and Molecular Medicine, University of California, Davis, USA) for providing numerical data (Saxton, 2014), Laszlo Groh (Department of Internal Medicine, Radboudumc, The Netherlands) for assistance with OCR and ECAR measurements, Hanka Venselaar (Centre for Molecular and Biomolecular Informatics, Radboudumc, the Netherlands) for discussions on protein conformation, Riekelt H. Houtkooper (Amsterdam UMC, University of Amsterdam, Amsterdam, The Netherlands) for discussions on UPR<sup>mt</sup> and Anna O. Chertkova (Section of Molecular Cytology and van Leeuwenhoek Centre for Advanced Microscopy, University of Amsterdam, The Netherlands) for cell culture. We thank the Radboudumc Microscopy Technology Center for equipment maintenance, training, and assistance with the FRAP and EM recordings. This work was supported by an equipment grant from NWO (Netherlands Organization for Scientific Research, No: 911-02-008). CEJD was supported by an NWO-VENI grant (#863.13.019). JB was supported by an EJP-RD grant ("CureMILS") through ZonMW (Netherlands Organisation for Health Research and Development; #463003001). WJHK was supported by a

junior researcher grant (EPB; Radboudmc, Nijmegen, The Netherlands), the Next Level Animal Sciences (NLAS) initiative (“Data and Models”) of the Wageningen University (Wageningen, The Netherlands) and by Principal Investigator (PI) support funding (Radboudumc).

### Author contributions

**Elianne P Bulthuis:** Formal analysis; supervision; validation; investigation; visualization; writing – original draft; writing – review and editing. **Cindy E J Dieteren:** Formal analysis; supervision; funding acquisition; validation; investigation; visualization; writing – original draft; writing – review and editing. **Jesper Bergmans:** Data curation; investigation; writing – review and editing. **Job Berkhout:** Formal analysis; investigation. **Jori A Wagenaars:** Formal analysis; investigation; visualization. **Els M A van de Westerlo:** Formal analysis; supervision; investigation; visualization. **Emina Podhumjak:** Investigation. **Mark A Hink:** Resources; formal analysis; supervision; investigation; writing – original draft. **Laura F B Hesp:** Investigation. **Hannah S Rosa:** Formal analysis; investigation. **Afshan N Malik:** Formal analysis; supervision; investigation; writing – original draft. **Mariska Kea-te Lindert:** Formal analysis; investigation; writing – original draft. **Peter H G M Willems:** Funding acquisition; writing – original draft. **Han J G E Gardeniers:** Writing – original draft; writing – review and editing. **Wouter K den Otter:** Conceptualization; resources; software; validation; visualization; methodology; writing – review and editing. **Merel J W Adjobo-Hermans:** Conceptualization; supervision; validation; investigation; visualization; writing – original draft; writing – review and editing. **Werner J H Koopman:** Conceptualization; data curation; formal analysis; supervision; funding acquisition; validation; visualization; methodology; writing – original draft; project administration; writing – review and editing.

### Disclosure and competing interests statement

WJHK is an *ad hoc* scientific advisor of Khondrion B.V. (Nijmegen, The Netherlands). This SME had no involvement in the data collection, analysis and interpretation, writing of the manuscript, and in the decision to submit the manuscript for publication.

## References

- Ader NR, Hoffmann PC, Ganeva I, Borgeaud AC, Wang C, Youle RJ, Kukulski W (2019) Molecular and topological reorganizations in mitochondrial architecture interplay during Bax-mediated steps of apoptosis. *Elife* 8: e40712
- Akabayov B, Akabayov SR, Lee SJ, Wagner G, Richardson CC (2013) Impact of macromolecular crowding on DNA replication. *Nat Commun* 4: 1615
- Andrews SS (2020) Effects of surfaces and macromolecular crowding on bimolecular reaction rates. *Phys Biol* 17: 045001
- Appelhans T, Richter CP, Wilkens V, Hess ST, Piehler J, Busch KB (2011) Nanoscale organisation of mitochondrial microcompartments revealed by combining tracking and localization microscopy. *Nano Lett* 12: 610–616
- Belazi D, Sole-Domenech S, Johansson B, Schalling M, Sjövall P (2009) Chemical analysis of osmium tetroxide staining in adipose tissue using imaging ToF-SIMS. *Histochem Cell Biol* 132: 105–115
- Bisht K, Sharma K, Lacoste B, Tremblay ME (2016) Dark microglia: why are they dark? *Commun Integr Biol* 9: e1230575
- Boersma AJ, Zuhorn IS, Poolman B (2015) A sensor for quantification of macromolecular crowding in living cells. *Nat Methods* 12: 227–229
- Böhm J, Thavaraja R, Giehler S, Nalaskowski MM (2017) A set of enhanced green fluorescent protein concatemers for quantitative determination of nuclear localization signal strength. *Anal Biochem* 533: 48–55
- Bulthuis EP, Adjobo-Hermans M, Willems PHGM, Koopman WJH (2019) Mitochondrial morphofunction in mammalian cells. *Antioxid Redox Signal* 30: 2066–2109
- Bulthuis EP, Einer C, Distelmaier F, Groh L, van Emst-de Vries SE, van de Westerlo E, van de Wal M, Wagenaars J, Rodenburg RJ, Smeitink JAM et al (2022) The decylTPP mitochondria-targeting moiety lowers electron transport chain supercomplex levels in primary human skin fibroblasts. *Free Radic Biol Med* 188: 434–446
- Calvo SE, Mootha VK (2010) The mitochondrial proteome and human disease. *Annu Rev Genomics Hum Genet* 11: 25–44
- Chambers JE, Kubánková M, Huber RG, López-Duarte I, Avezov E, Bond PJ, Marciniak SJ, Kuimova MK (2018) An optical technique for mapping microviscosity dynamics in cellular organelles. *ACS Nano* 12: 4398–4407
- Chazotte B, Hackenbrock CR (1988) The multicollisional, obstructed, long-range diffusional nature of mitochondrial electron transport. *J Biol Chem* 263: 14359–14367
- Chen E, Esquerre RM, Meléndez PA, Chandrasekaran SS, Klinger DS (2018) Microviscosity in *E coli* cells from time-resolved linear dichroism measurements. *J Phys Chem B* 122: 11381–11389
- Cogliati S, Enriquez JA, Scorrano L (2016) Mitochondrial cristae: where beauty meets functionality. *Trends Biochem Sci* 41: 261–273
- Cravens SL, Schonhoft JD, Rowland MM, Rodriguez AA, Anderson BG, Stivers JT (2015) Molecular crowding enhances facilitated diffusion of two human DNA glycosylases. *Nucleic Acids Res* 43: 4087–4097
- Delarue M, Brittingham GP, Pfeffer S, Surovtsev IV, Pinglay S, Kennedy KJ, Schaffer M, Gutierrez JI, Sang D, Poterewicz G et al (2018) mTORC1 controls phase separation and the biophysical properties of the cytoplasm by tuning crowding. *Cell* 174: 338–349
- Dey P, Bhattacharjee A (2019) Disparity in anomalous diffusion of proteins searching for their target DNA sites in a crowded medium is controlled by the size, shape and mobility of macromolecular crowders. *Soft Matter* 15: 1960–1969
- Dieteren CEJ, Willems PHGM, Vogel RO, Swarts HG, Fransen J, Roepman R, Crienem G, Smeitink JAM, Nijtmans LGJ, Koopman WJH (2008) Subunits of mitochondrial complex I exist as part of matrix- and membrane-associated subcomplexes in living cells. *J Biol Chem* 283: 34753–34761
- Dieteren CEJ, Koopman WJH, Nijtmans LGJ (2009) Tracing human mitochondrial complex I assembly by use of GFP-tagged subunits. *Methods Enzymol* 456: 133–151
- Dieteren CEJ, Gielen SCAM, Nijtmans LGJ, Smeitink JAM, Swarts HG, Brock R, Willems PHGM, Koopman WJH (2011a) Solute diffusion is hindered in the mitochondrial matrix. *Proc Natl Acad Sci USA* 108: 8657–8662
- Dieteren CEJ, Willems PHGM, Swarts HG, Fransen J, Smeitink JAM, Koopman WJH, Nijtmans LGJ (2011b) Defective mitochondrial translation differentially affects the live cell dynamics of complex I subunits. *Biochim Biophys Acta* 1807: 1624–1633
- Divakaruni AS, Jastroch M (2022) A practical guide for the analysis, standardization and interpretation of oxygen consumption measurements. *Nat Metab* 4: 978–994
- Dragan A, Graham AE, Geddes CD (2014) Fluorescence-based broad dynamic range viscosity probes. *J Fluoresc* 24: 397–402
- Dross N, Spriet C, Zwirger M, Müller G, Waldeck W, Langowski J (2009) Mapping eGFP oligomer mobility in living cell nuclei. *PLoS ONE* 4: e5041



- Einstein A (1905) Über die von der molekularkinetischen Theorie der Wärme geforderte Bewegung von in ruhenden Flüssigkeiten suspendierten Teilchen. *AdP* 322: 549–560
- Fernández-Vizarra E, Ugalde C (2022) Cooperative assembly of the mitochondrial respiratory chain. *Trends Biochem Sci* 47: 999–1008
- Fernie AR, Zhang Y, Sweetlove LJ (2018) Passing the baton: substrate channelling in respiratory metabolism. *Research* 2018: 1539325
- Filippin L, Abad MC, Gastaldello S, Magelhães PJ, Sandonà D, Pozzan T (2005) Improved strategies for the delivery of GFP-based Ca<sup>2+</sup> sensors into the mitochondrial matrix. *Cell Calcium* 37: 129–136
- Fuentes-Lemus E, Reyes JS, Gamon LF, López-Alarcón C, Davies MJ (2021) Effect of macromolecular crowding on protein oxidation: consequences on the rate, extent and oxidation pathways. *Redox Biol* 48: 102202
- Gerencser AA, Adam-Vizi V (2005) Mitochondrial Ca<sup>2+</sup> dynamics reveals limited intramitochondrial Ca<sup>2+</sup> diffusion. *Biophys J* 88: 698–714
- Guerrero-Castillo S, Baertling F, Kownatzki D, Wessels HJ, Arnold S, Brandt U, Nijtmans LGJ (2017) The assembly pathway of mitochondrial respiratory chain complex I. *Cell Metab* 25: 128–139
- Hackenbrock CR (1966) Ultrastructural bases for metabolically linked mechanical activity in mitochondria. I. Reversible ultrastructural changes with change in metabolic steady state in isolated liver mitochondria. *J Cell Biol* 30: 269–297
- Hackenbrock CR (1972) Energy-linked ultrastructural transformations in isolated liver mitochondria and mitoplasts. *J Cell Biol* 53: 450–456
- Haggie PM, Verkman AS (2002) Diffusion of tricarboxylic acid cycle enzymes in the mitochondrial matrix in vivo. *J Biol Chem* 277: 40782–40788
- Hansen MMK, Mijer LHH, Spruijt E, Maas RJM, Ventosa Roquelles M, Groen J, Heus HA, Huck WTS (2016) Macromolecular crowding develops heterogeneous environments of gene expression in picoliter droplets. *Nat Nanotechnol* 11: 191–197
- He L, Niemeyer B (2003) A novel correlation for protein diffusion coefficients based on molecular weight and radius of gyration. *Biotechnol Prog* 19: 544–548
- Hochmair J, Exner C, Franck M, Dominguez-Baquero A, Diez L, Brognaro H, Kraushar ML, Mielke T, Radbruch H, Kaniyappan S et al (2022) Molecular crowding and RNA synergize to promote phase separation, microtubule interaction, and seeding of tau condensates. *EMBO J* 17: e108882
- Hock DH, Robinson DRL, Stroud DA (2020) Blackout in the powerhouse: clinical phenotypes associated with defects in the assembly of OXPHOS complexes and the mitoribosome. *Biochem J* 477: 4085–4132
- Houtkooper RH, Mouchiroud L, Ryu D, Moullan N, Katsyuba E, Knott G, Williams RW, Auwerx J (2013) Mitonuclear protein imbalance as a conserved longevity mechanism. *Nature* 497: 451–459
- Hu C, Shu L, Huang X, Yu J, Li L, Gong L, Yang M, Wu Z, Gao Z, Zhao Y et al (2020) OPA1 and MICOS regulate mitochondrial crista dynamics and formation. *Cell Death Dis* 11: 940
- Jiménez-Sánchez A, Lei EK, Kelley SO (2018) A multifunctional chemical probe for the measurement of local micropolarity and microviscosity in mitochondria. *Angew Chem Int Ed Engl* 57: 8891–8895
- Joyner RP, Tang JH, Helenius J, Dultz E, Brune C, Holt LJ, Huet S, Müller DJ, Weis K (2015) A glucose-starvation response regulates the diffusion of macromolecules. *Elife* 5: e09376
- Junker NO, Vaghefikia F, Albarghash A, Höfig H, Kempe D, Walter J, Otten J, Pohl M, Katranidid A, Wiegand S et al (2019) Impact of molecular crowding on translational mobility and conformational properties of macromolecules. *J Phys Chem B* 123: 447–4486
- Kekenes-Huskey PM, Eun C, McCammon JA (2015) Enzyme localization, crowding, and buffers collectively modulate diffusion-influenced signal transduction: insights from continuum diffusion modelling. *J Chem Phys* 143: 094103
- Kislev N, Spolsky CM, Eisenstadt JM (1973) Effect of chloramphenicol on the ultrastructure of mitochondria in sensitive and resistant strains of HeLa. *J Cell Biol* 57: 571–579
- Koopman WJH, Hink MA, Verkaart S, Visch HJ, Smeitink JAM, Willems PHGM (2007) Partial complex I inhibition decreases mitochondrial motility and increases matrix protein diffusion as revealed by fluorescence correlation spectroscopy. *Biochim Biophys Acta* 1767: 940–947
- Koopman WJH, Distelmaier F, Esseling JJ, Smeitink JAM, Willems PHGM (2008a) Computer-assisted live cell analysis of mitochondrial membrane potential, morphology and calcium handling. *Methods* 46: 304–311
- Koopman WJH, Distelmaier F, Hink MA, Verkaart S, Wijers M, Fransen J, Smeitink JAM, Willems PHGM (2008b) Inherited complex I deficiency is associated with faster protein diffusion in the matrix of moving mitochondria. *Am J Physiol Cell Physiol* 294: C124–C132
- Koopman WJH, Nijtmans LGJ, Dieteren CEJ, Roestenberg P, Valsecchi F, Smeitink JAM, Willems PHGM (2010) Mammalian mitochondrial complex I: biogenesis, regulation, and reactive oxygen species generation. *Antioxid Redox Signal* 12: 1431–1470
- Kubankova M, Summers PA, Lpez-Duarte I, Kiryushko D, Kuimova KM (2019) Microscopic viscosity of neuronal plasma membranes measured using fluorescent molecular rotors: effects of oxidative stress and neuroprotection. *ACS Appl Mater Interfaces* 11: 36307–36315
- Kuznetzova IM, Turoverov KK, Uversky VN (2014) What macromolecular crowding can do to a protein. *Int J Mol Sci* 15: 23090–23140
- Lenk R, Penman S (1971) Morphological studies of cells grown in the absence of mitochondrial-specific protein synthesis. *J Cell Biol* 49: 541–546
- Li CH, Tzeng SL, Cheng YW, Kang JJ (2005) Chloramphenicol-induced mitochondrial stress increases p21 expression and prevents cell apoptosis through a p21-dependent pathway. *J Biol Chem* 280: 26193–26199
- Liu F, Luo Y, Xu M (2018) Viscosity measurements using a two-photon ratiometric fluorescent sensor with two rotors. *Tetrahedron Lett* 59: 4540–4544
- Lizana L, Konkoli Z, Bauer B, Jesorka A, Orwar O (2008) Controlling chemistry by geometry in nanoscale systems. *Annu Rev Phys Chem* 60: 449–468
- Mika JT, van den Bogaart G, Veenhoff L, Krasnikov V, Poolman B (2010) Molecular sieving properties of the cytoplasm of *Escherichia coli* and consequences of osmotic stress. *Mol Microbiol* 77: 200–207
- Minton AP (1990) Holobiochemistry: the effect of local environment upon the equilibria and rates of biochemical reactions. *Int J Biochem* 22: 1063–1067
- Mittal S, Chowhan RK, Singh LR (2015) Macromolecular crowding: macromolecules friend or foe. *Biochim Biophys Acta* 1850: 1822–1831
- Molines AT, Lemièrre J, Gazzola M, Steinmark IE, Edrington CH, Hsu CT, Real-Calderon P, Suhling K, Goshima G, Holt LJ et al (2022) Physical properties of the cytoplasm modulate the rates of microtubule polymerization and depolymerization. *Dev Cell* 57: 466–479
- Moullan N, Mouchiroud L, Wang X, Ryu D, Williams EG, Mottis A, Jovaisaite V, Frochaux MV, Quiros PM, Deplancke B et al (2015) Tetracyclines disturb mitochondrial function across eukaryotic models: a call for caution in biomedical research. *Cell Rep* 10: 1681–1691
- Nenninger A, Mastroianni G, Mullineaux CW (2010) Size dependence of protein diffusion in the cytoplasm of *Escherichia coli*. *J Bacteriol* 192: 4535–4540
- Ölveczky BP, Verkman AS (1998) Monte Carlo analysis of obstructed diffusion in three dimensions: application to molecular diffusion in organelles. *Biophys J* 74: 2722–2730

- Pack C, Saito K, Tamura M, Kinjo M (2006) Microenvironment and effect of energy depletion in the nucleus analyzed by mobility of multiple oligomeric EGFPs. *Biophys J* 91: 3921–3936
- Papadopoulos S, Jürgens KD, Gros G (2000) Protein diffusion in living skeletal muscle fibers: dependence on protein size, fiber type, and contraction. *Biophys J* 79: 2084–2094
- Partikian A, Olveczky B, Swaminathan R, Li Y, Verkman AS (1998) Rapid diffusion of green fluorescent protein in the mitochondrial matrix. *J Cell Biol* 140: 821–829
- Perkins GA, Ellisman MH (2011) Mitochondrial configurations in peripheral nerve suggest differential ATP production. *J Struct Biol* 173: 117–127
- Perrin F (1936) Mouvement Brownien d'un ellipsoïde (II). Rotation libre et dépolariation des fluorescences. Translation et diffusion de molécules ellipsoïdales. *J Phys Radium* 7: 1–11
- Poggi CG, Slade KM (2015) Macromolecular crowding and the steady-state kinetics of malate dehydrogenase. *Biochemistry* 54: 260–267
- Polita A, Toliautas S, Žvirblis R, Vyšniauskas A (2020) The effect of solvent polarity and macromolecular crowding on the viscosity sensitivity of a molecular rotor BODIPY-C<sub>10</sub>. *Phys Chem Chem Phys* 16: 8296–8303
- Porter KR, Kallman F (1953) The properties and effects of osmium tetroxide as a tissue fixative with special reference to its use for electron microscopy. *Exp Cell Res* 4: 127–141
- Prazeres DMF (2008) Prediction of diffusion coefficients of plasmids. *Biotechnol Bioeng* 99: 1040–1044
- Puchkov EO (2013) Intracellular viscosity: methods of measurement and role in metabolism. *Biochem (Mosc) Suppl A Membr Cell Biol* 7: 279
- Rath S, Sharma R, Gupta R, Ast T, Chan C, Durham JH, Goodman RP, Grabarek Z, Haas ME, Hung WHW et al (2021) MitoCarta 3.0: an updated mitochondrial proteome now with sub-organelle localization and pathway annotations. *Nucl Acids Res* 49: D1541–D1547
- Ren M, Zhou K, Wang L, Liu K, Lin W (2018) Construction of a ratiometric two-photon fluorescent probe to monitor the changes of mitochondrial viscosity. *Sens Actuators B* 262: 452–459
- Ren M, Xu Q, Wang S, Liu L, Kong F (2020) A biotin-guided fluorescent probe for dual-mode imaging of viscosity in cancerous cells and tumor tissues. *Chem Commun* 56: 13351–13354
- Rivas G, Minton AP (2016) Macromolecular crowding *in vitro*, *in vivo* and in between. *Trends Biochem Sci* 41: 970–981
- Robinson JB, Srere PA (1985) Organization of Krebs Tricarboxylic acid cycle enzymes in mitochondria. *J Biol Chem* 260: 10800–10805
- Sasaki K, Uchiumi T, Toshima T, Yagi M, Do Y, Hirai H, Igami K, Gotoh K, Kang D (2020) Mitochondrial translation inhibition triggers ATF4 activation, leading to integrated stress response but not to mitochondrial unfolded protein response. *Biosci Rep* 40: BSR20201289
- Saxton MJ (2014) Wanted: scalable tracers for diffusion measurements. *J Phys Chem B* 118: 12805–12817
- Scalettar BA, Abney JR, Hackenbrock CR (1991) Dynamics, structure and function are coupled in the mitochondrial matrix. *Proc Natl Acad Sci USA* 88: 8057–8061
- Schavemaker PE, Boersma AJ, Poolman B (2018) How important is protein diffusion in prokaryotes? *Front Mol Biosci* 5: 93
- Schmidt CA, Fisher-Wellman KH, Neuffer PD (2021) From OCR and ECAR to energy: perspectives on the design and interpretation of bioenergetics studies. *J Biol Chem* 4: 101140
- Segawa M, Wolf DM, Hultgren NW, Williams DS, van der Blik AM, Schackelford DB, Liesa M, Shirihai OS (2020) Quantification of cristae architecture reveals time-dependent characteristics of individual mitochondria. *Life Sci Alliance* 3: e201900620
- Shpilka T, Haynes CM (2018) The mitochondrial UPR: mechanisms, physiological functions and implications in ageing. *Nat Rev Mol Cell Biol* 19: 109–120
- Smeitink JAM, van den Heuvel L, DiMauro S (2001) The genetics and pathology of oxidative phosphorylation. *Nat Rev Genet* 2: 342–352
- Sprague BL, McNally JG (2005) FRAP analysis of binding: proper and fitting. *Trends Cell Biol* 15: 84–91
- Sprenger HG, Langer T (2019) The good and the bad of mitochondrial breakups. *Trends Cell Biol* 29: 888–900
- Steinmark IE, James AL, Chung PH, Morton PE, Parsons M, Dreiss CA, Lorentz CD, Yahioğlu G, Suhling K (2019) Targeted fluorescence lifetime probes reveal responsive organelle viscosity and membrane fluidity. *PLoS ONE* 14: e0211165
- Stephan T, Roesch A, Riedel D, Jakobs S (2019) Live-cell STED nanoscopy of mitochondrial cristae. *Sci Rep* 9: 12419
- Sutherland W (1905) A dynamical theory of diffusion for non-electrolytes and the molecular mass of albumin. *Philos Mag* 9: 781–785
- Tyn MT, Gusek TD (1990) Prediction of diffusion coefficients of proteins. *Biotechnol Bioeng* 35: 327–338
- Vámosi G, Mücke N, Müller G, Krieger JW, Curth U, Langowski J, Tóth K (2014) EGFP oligomers as natural fluorescence and hydrodynamic standards. *Sci Rep* 6: 33022
- Van den Bogaart G, Hermans N, Krasnikov V, Poolman B (2007) Protein mobility and diffusive barriers in *Escherichia coli*: consequences of osmotic stress. *Mol Microbiol* 64: 858–871
- Van Tartwijk FW, Kaminski CF (2022) Protein condensation, cellular organization and spatiotemporal regulation of cytoplasmic properties. *Adv Biol* 6: e2101328
- Verkman AS (2002) Solute and macromolecular diffusion in cellular aqueous compartments. *Trends Biochem Sci* 27: 27–33
- Vögtle FN, Burkhart JM, Gonczarowska-Jorge H, Kücükköse C, Taskin AA, Kopczyński D, Ahrends R, Mossmann D, Sickmann A, Zahedi RP et al (2017) Landscape of submitochondrial protein distribution. *Nat Commun* 8: 290
- Von Smoluchowski M (1906) Zur kinetischen theorie der Brownschen Molekularbewegung und der suspensionen. *Ann Phys* 326: 756–780
- Vorontsova I, Vallmitjana A, Torrado B, Schilling TF, Hall JE, Gratton E, Malacrida L (2022) In vivo macromolecular crowding is differentially modulated by aquaporin 0 in zebrafish lens: insights from a nanoenvironment sensor and spectral imaging. *Sci Adv* 8: eabj4833
- Vyšniauskas A, Qurashi M, Gallop N, Balaz M, Anderson HL, Kuimova MK (2015) Unravelling the effects of temperature on viscosity-sensitive fluorescence molecular rotors. *Chem Sci* 6: 5773–5778
- Wang C, Taki M, Sato Y, Tamura Y, Yaginuma H, Okada Y, Yamaguchi S (2019) A photostable fluorescent marker for the superresolution live imaging of the dynamic structure of the mitochondrial cristae. *Proc Natl Acad Sci USA* 116: 15817–15822
- Weilandt DR, Hatzimanikatis V (2019) Particle-based simulation reveals macromolecular crowding effects on the Michaelis-Menten mechanism. *Biophys J* 117: 355–368
- Weiss M (2014) Crowding, diffusion, and biochemical reactions. Chapter 11 in: new models of the cell nucleus: crowding, entropic forces, phase separation, and fractals. *Int Rev Cell Mol Biol* 307: 383–417
- Weissert V, Rieger B, Morris S, Arroum T, Psathaki OE, Zobel T, Perkins G, Busch KB (2021) Inhibition of the mitochondrial ATPase function by IF1 changes the spatiotemporal organisation of ATP synthase. *Biochim Biophys Acta Bioenerg* 1862: 148322

- Wilcox XE, Ariola A, Jackson JR, Slade KM (2020) Overlap concentration and the effect of macromolecular crowding on citrate synthase activity. *Biochemistry* 59: 1737–1746
- Wilkens V, Kohl W, Busch K (2013) Restricted diffusion of OXPHOS complexes in dynamic mitochondrial delays their exchange between cristae and engenders a transitory mosaic distribution. *J Cell Sci* 126: 103–116
- Willems PHGM, Rossignol R, Dieteren CEJ, Murphy MP, Koopman WJH (2015) Redox homeostasis and mitochondrial dynamics. *Cell Metab* 22: 207–218
- Wolf DM, Segawa M, Kondadi AK, Anand R, Bailey ST, Reichert AS, van der Bliek AM, Schackelford DB, Liesa M, Shirihai O (2019) Individual cristae within the same mitochondrion display different membrane potentials and are functionally independent. *EMBO J* 38: e101056
- Xiao H, Li P, Tang B (2021) Small molecular fluorescent probes for imaging of viscosity in living biosystems. *Chemistry* 27: 6880–6898
- Yang Z, He Y, Lee JH, Park N, Suh M, Chae WS, Cao J, Peng X, Jung H, Kang C et al (2013) A self-calibrating bipartite viscosity sensor for mitochondria. *J Am Chem Soc* 135: 9181–9185
- Yin J, Huang L, Wu L, Li J, James TD, Lin W (2021) Small molecule based fluorescent chemosensors for imaging the microenvironment within specific cellular regions. *Chem Soc Rev* 50: 12098–12150
- Young ME, Carroad PA, Bell RL (1980) Estimation of diffusion coefficients of proteins. *Biotechnol Bioeng* 22: 947–955
- Yu I, Mori T, Ando T, Harada R, Jung J, Sugita Y, Feig M (2016) Biomolecular interactions modulate macromolecular structure and dynamics in atomistic model of a bacterial cytoplasm. *Elife* 5: e19274
- Zhang C, Shao PG, van Kan JA, van der Maarel JRC (2009) Macromolecular crowding induced elongation and compaction of single DNA molecules confined in a nanochannel. *Proc Natl Acad Sci USA* 106: 16651–16656
- Zhou HX, Rivas G, Minton AP (2008) Macromolecular crowding and confinement: biochemical, biophysical and potential physiological consequences. *Annu Rev Biophys* 37: 375–397

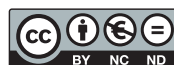

**License:** This is an open access article under the terms of the [Creative Commons Attribution-NonCommercial-NoDerivs](https://creativecommons.org/licenses/by-nc-nd/4.0/) License, which permits use and distribution in any medium, provided the original work is properly cited, the use is non-commercial and no modifications or adaptations are made.

## Expanded View Figures

**Figure EV1. Compact and extended structural conformations of AcGFP1 concatemers.**

- A Dimensions (numerals) of AcGFP1 in Angstrom ( $\text{\AA}$ ) based upon GFP crystal structure. R and L indicate the radius and length of the protein, respectively. Geometric data are summarized in Table 1.
- B Same as panel (A) but now for AcGFP1<sup>2</sup> displaying a minimal structural conformation ("compact").
- C Same as panel (A) but now for AcGFP1<sup>2</sup> displaying a structural conformation of maximal size ("extended").
- D Same as panel (A) but now for AcGFP1<sup>3</sup> displaying a compact structure.
- E Same as panel (A) but now for AcGFP1<sup>3</sup> displaying an extended structure.
- F Same as panel (A) but now for AcGFP1<sup>4</sup> displaying a compact structure.
- G Same as panel (A) but now for AcGFP1<sup>4</sup> displaying an extended structure.



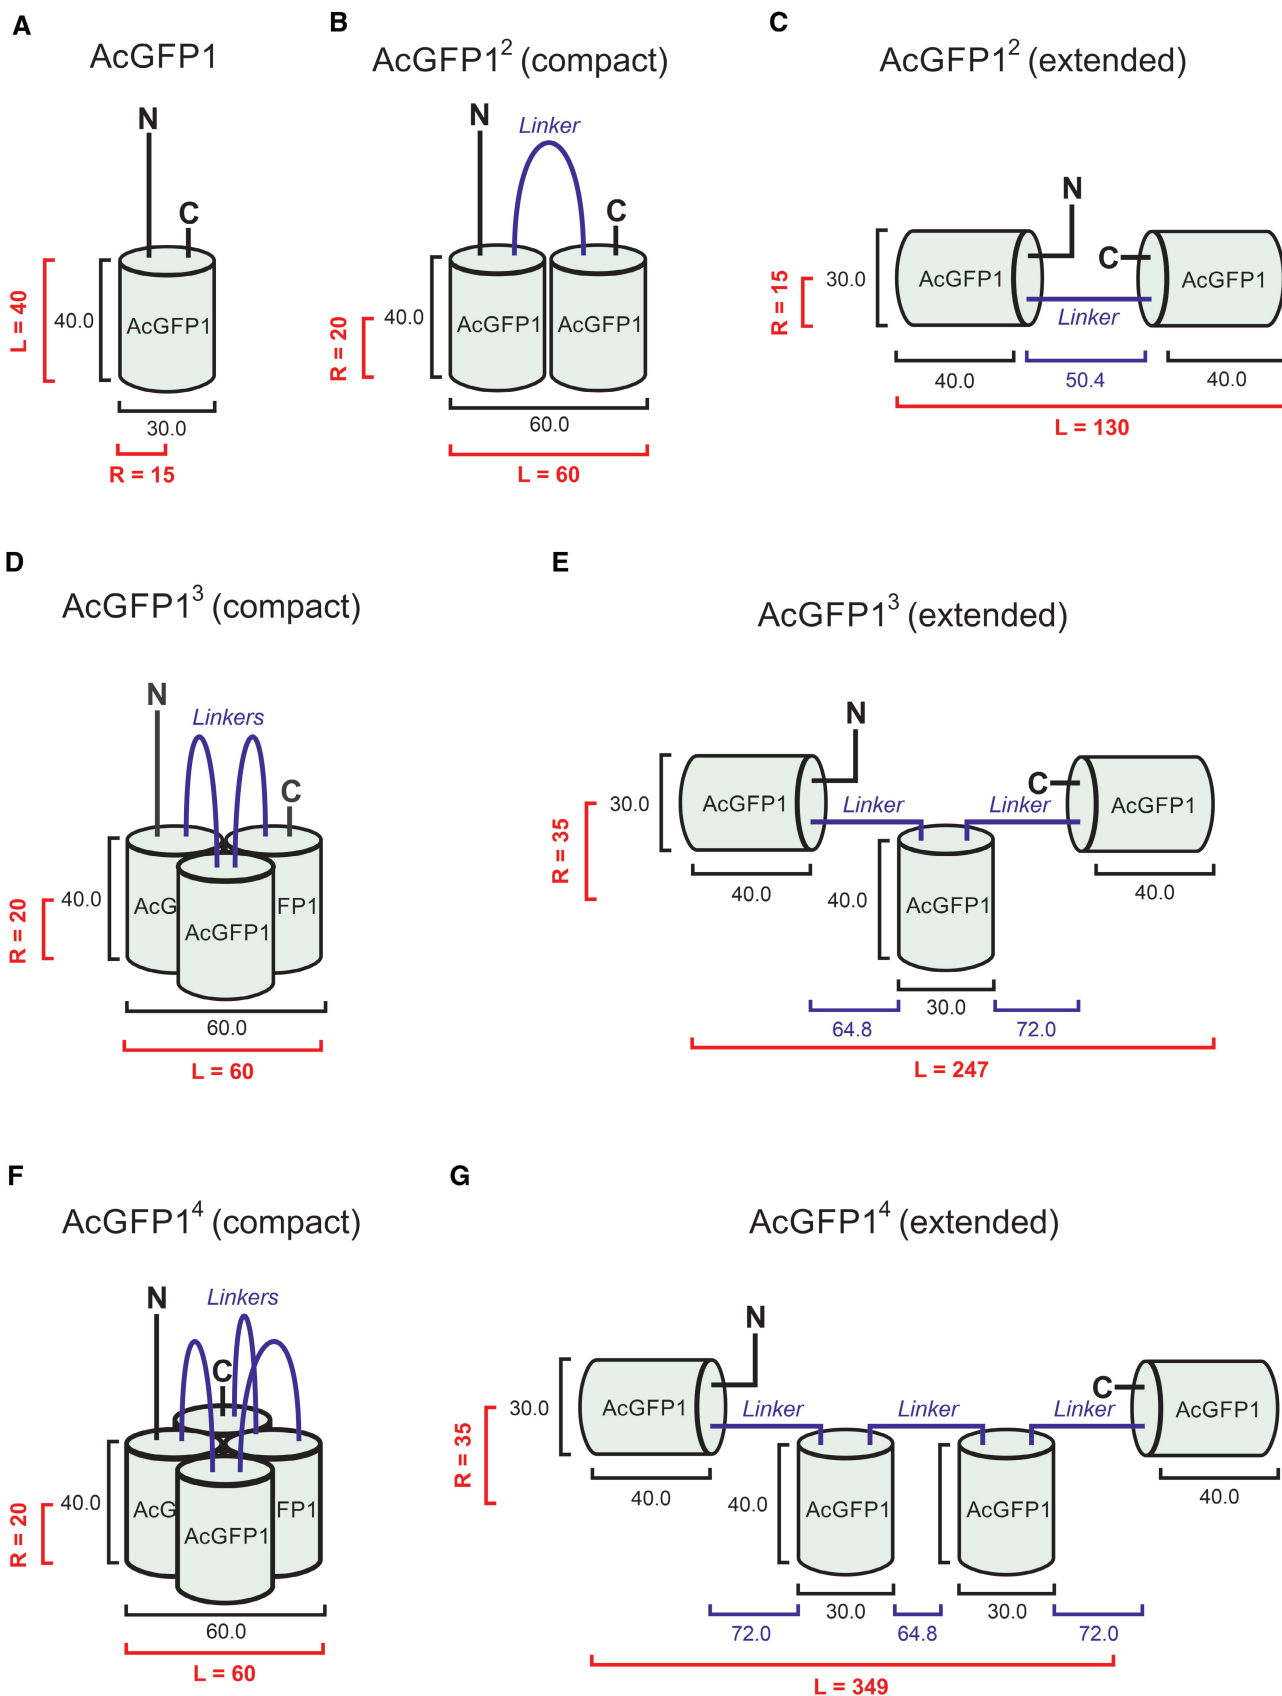

Figure EV1.

**Figure EV2. Functional consequences of chloramphenicol (CAP) treatment in HeLa parental cells.**

- A Average oxygen consumption rate (OCR) in untreated cells, and cells treated with DOX, CAP, or DOX + CAP (for legend see panel B). Oligomycin (OLI), mitochondrial uncoupler (FCCP), and antimycin A + rotenone (AA/ROT) were added at the indicated time points.
- B Same as panel (A) but now for the average extracellular acidification rate (ECAR).
- C Statistical analysis of the data in panel (A and B) with respect to the basal OCR, maximal OCR and basal ECAR.
- D Effect of CAP on the TMRM fluorescence signal in mitochondria and nucleus. Left panel: Typical example of fluorescence microscopy image of TMRM-stained cells. Fluorescence signals were manually determined in two regions of interest (yellow) defined in a mitochondria-dense ("m") and nucleoplasmic part ("n") of the cell and corrected for background using a close by ROI outside of the cell ("b"). Data panels: numerical values for the mitochondrial fluorescence signal (mito), nuclear fluorescence signal (nucleus) and fluorescence ratio value (mito/nucleus).
- E Effect of DOX, CAP or DOX + CAP on the cellular protein levels of LONP1 (specific bands marked by red boxes), mtHSP70, mtHSP60, CLPP and CHOP.  $\beta$ -actin was used as cellular loading control. Arrowheads indicate molecular weight in kDa. Individual panels were contrast-optimized for visualization purposes. Original blots are presented in Appendix Fig S5B.
- F Effect of CAP on mitochondrial DNA (mtDNA) levels expressed as number of mtDNA copies per cell and per nanogram (ng) of total DNA.
- G Effect of CAP on the cellular levels of key mitochondrial fission and fusion proteins (specific bands are marked by red boxes): DRP1 (Dynamamin-related protein 1, OPA1 (Optic atrophy protein 1), MFN2 (Mitofusin 2).  $\beta$ -actin and VDACC1 were used as cellular and mitochondrial loading controls, respectively. Arrowheads indicate molecular weight in kDa. Individual panels were contrast-optimized for visualization purposes. Original blots are presented in Appendix Fig S5A.

Data information: OCR and ECAR data (panels A–C) was obtained in a single ( $N = 1$ ) experiment and the following number ( $n$ ) of technical replicates: Untreated ( $n = 5$ ), +DOX ( $n = 5$ ), +CAP ( $n = 4$ ), +DOX+CAP ( $n = 6$ ). TMRM data (Panel D) was obtained in  $N = 2$  independent experiments for  $n = 991$  cells (–CAP) and  $n = 668$  cells (+CAP). MtDNA data (panel F) was obtained in  $N = 2$  independent experiments in  $n = 7$  assays (–CAP) and  $n = 6$  assays (+CAP). Each symbol represents an individual well (panel C), cell (panel D) or assay (panel F). In panels (A and B), individual data points reflect mean  $\pm$  SEM. In panel (C), bars and errors reflect mean  $\pm$  SEM. In panels (D and F), error bars mark the 95% (upper) and 5% (lower) percentile, the boundary boxes mark the 75% (upper) and 25% (lower) percentile, the square marks the mean value of the data, and the horizontal line within the box indicates the median value of the data. Significant differences, obtained using an independent Student's *t*-test, are indicated by \* $P < 0.05$ , \*\* $P < 0.01$ , \*\*\* $P < 0.001$  between the marked conditions (a–c) in panel (C) and between the –CAP and +CAP condition (panel D and F). Not significant is marked by n.s. The exact *P*-values for panel (C) (basal OCR) were: Untreated (a) vs. +DOX (b):  $P = 0.0126$ ; Untreated (a) vs. +CAP (c):  $P = 1.554 \cdot 10^{-6}$ ; Untreated (a) vs. +DOX+CAP:  $P = 4.082 \cdot 10^{-8}$ ; +DOX (b) vs. +CAP (c):  $P = 2.671 \cdot 10^{-7}$ ; +DOX (b) vs. +DOX + CAP:  $P = 3.806 \cdot 10^{-9}$ . The exact *P*-values for panel (C) (maximal OCR) were: Untreated (a) vs. +DOX (b):  $P = 6.509 \cdot 10^{-4}$ ; Untreated (a) vs. +CAP (c):  $P = 2.019 \cdot 10^{-7}$ ; Untreated (a) vs. +DOX+CAP:  $P = 4.900 \cdot 10^{-9}$ ; +DOX (b) vs. +CAP (c):  $P = 4.558 \cdot 10^{-8}$ ; +DOX (b) vs. +DOX + CAP:  $P = 5.713 \cdot 10^{-10}$ . The exact *P*-values for panel (C) (basal ECAR) were: Untreated (a) vs. +DOX (b):  $P = 0.0023$ ; Untreated (a) vs. +CAP (c):  $P = 4.571 \cdot 10^{-8}$ ; Untreated (a) vs. +DOX+CAP:  $P = 7.784 \cdot 10^{-10}$ ; +DOX (b) vs. +CAP (c):  $P = 2.412 \cdot 10^{-8}$ ; +DOX (b) vs. +DOX+CAP:  $P = 7.039 \cdot 10^{-10}$ . The exact *P*-value for panel (C) (mito) was:  $P = 7.145 \cdot 10^{-6}$ . The exact *P*-value for panel (C) (nucleus) was:  $P = 0.0237$ . The exact *P*-value for panel (C) (mito/nucleus) was:  $P = 5.702 \cdot 10^{-5}$ . The exact *P*-value for panel (F) (per cell) was:  $P = 0.556$ . The exact *P*-value for panel (F) (per ng total DNA) was:  $P = 0.139$ .

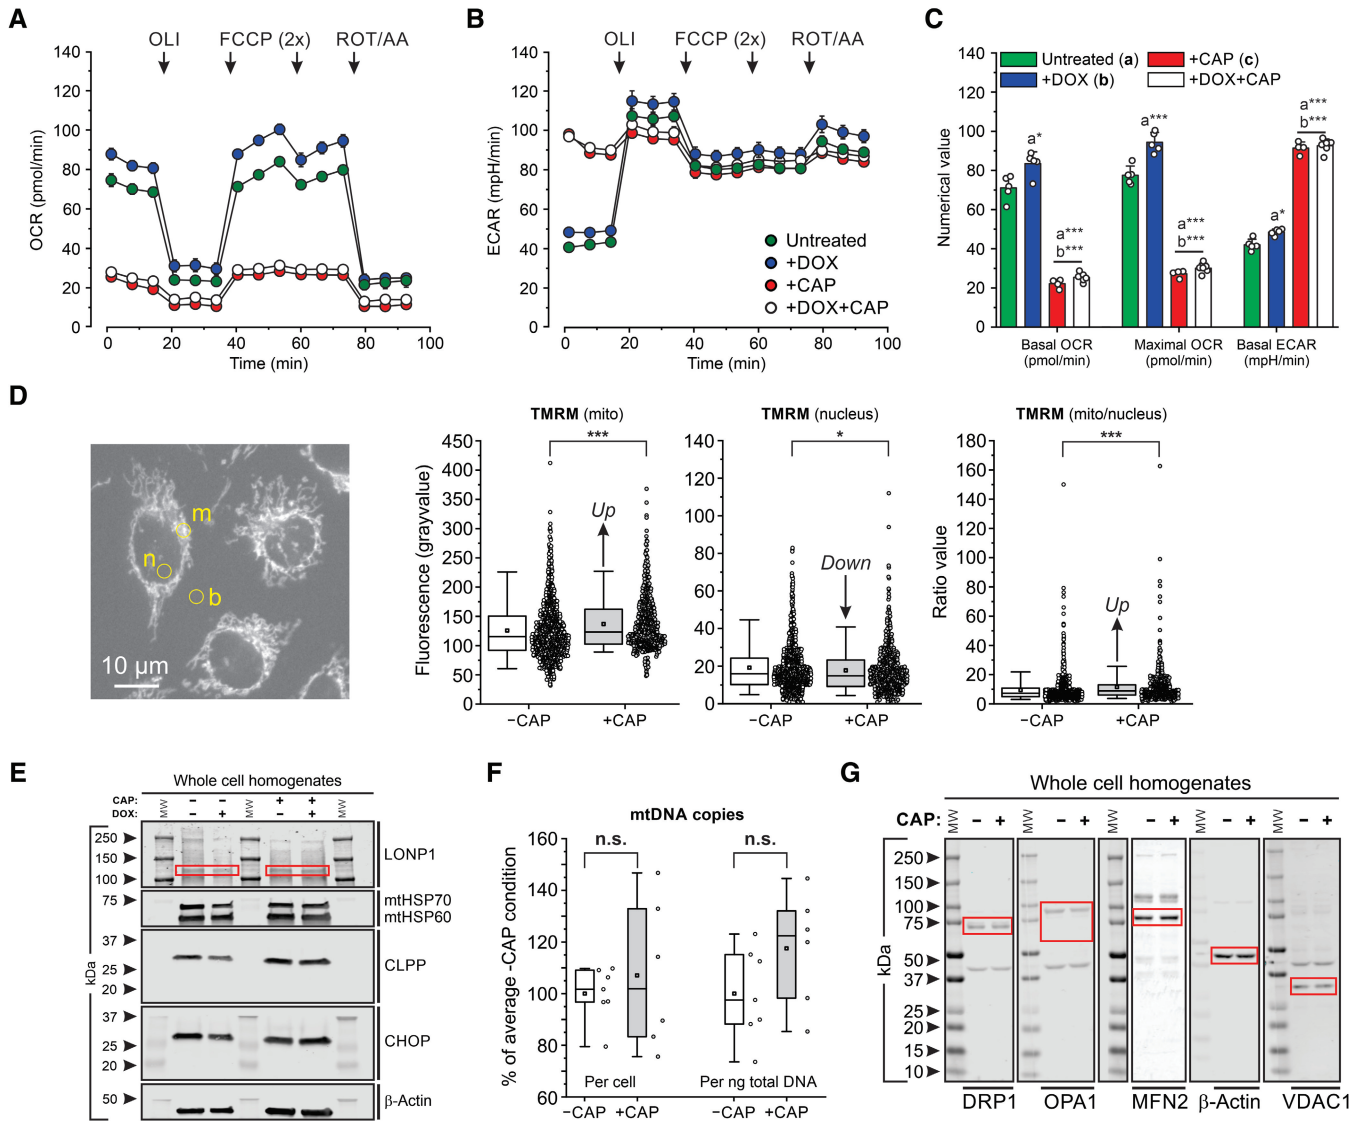

Figure EV2.

**Figure EV3. Chloramphenicol (CAP) and doxycycline (DOX) do not increase protein markers typically associated with induction of the mitochondrial unfolded protein response (UPR<sup>mt</sup>) in parental and FP-expressing cells.**

A Western blot analysis (SDS-PAGE) of whole-cell homogenates was used to assess the levels of the following proteins: LONP1, mtHSP70, mtHSP60, CLPP, and CHOP.  $\beta$ -actin was used as a cellular loading control. MW indicates molecular weight in kDa. Effect of the expression inducer DOX (1  $\mu$ g/ml, 24 h) and CAP (40  $\mu$ g/ml, 72 h), alone and in combination (i.e., 48-h CAP treatment followed by 24 h CAP + DOX treatment), on protein levels in FP-expressing HeLa cell lines (AcGFP1<sup>2</sup>, AcGFP1<sup>3</sup>, and AcGFP1<sup>4</sup>). Individual panels were contrast-optimized for visualization purposes. Original blots are presented in Appendix Fig S4.

B Quantitative analysis of protein levels in panel A and in HeLa parental cells (the open symbols reflect data for the parental cells in Appendix Fig S5B). All signals were normalized on  $\beta$ -actin and expressed as % of the condition without DOX and CAP (“-DOX-CAP”). Effects previously associated with UPR<sup>mt</sup> induction are marked: “Up” indicates proteins that are expected to be upregulated upon UPR<sup>mt</sup> induction, “Down” indicates proteins that are expected to be downregulated upon UPR<sup>mt</sup> induction.

Data information: The effects of DOX, CAP, and DOX + CAP were compared with the “-DOX-CAP” (untreated) condition (i.e., with the dotted line marked “&”) by testing whether the mean value for each protein (i.e., within each gray box in panel B) differed from 100% (using a one-sample Student’s *t*-test). Comparisons with the DOX only condition (+DOX; marked “a”) and CAP-only condition (+CAP; marked “b”) were performed using an independent two-population *t*-test (i.e., between each gray box for each protein). Not significant is marked by n.s.

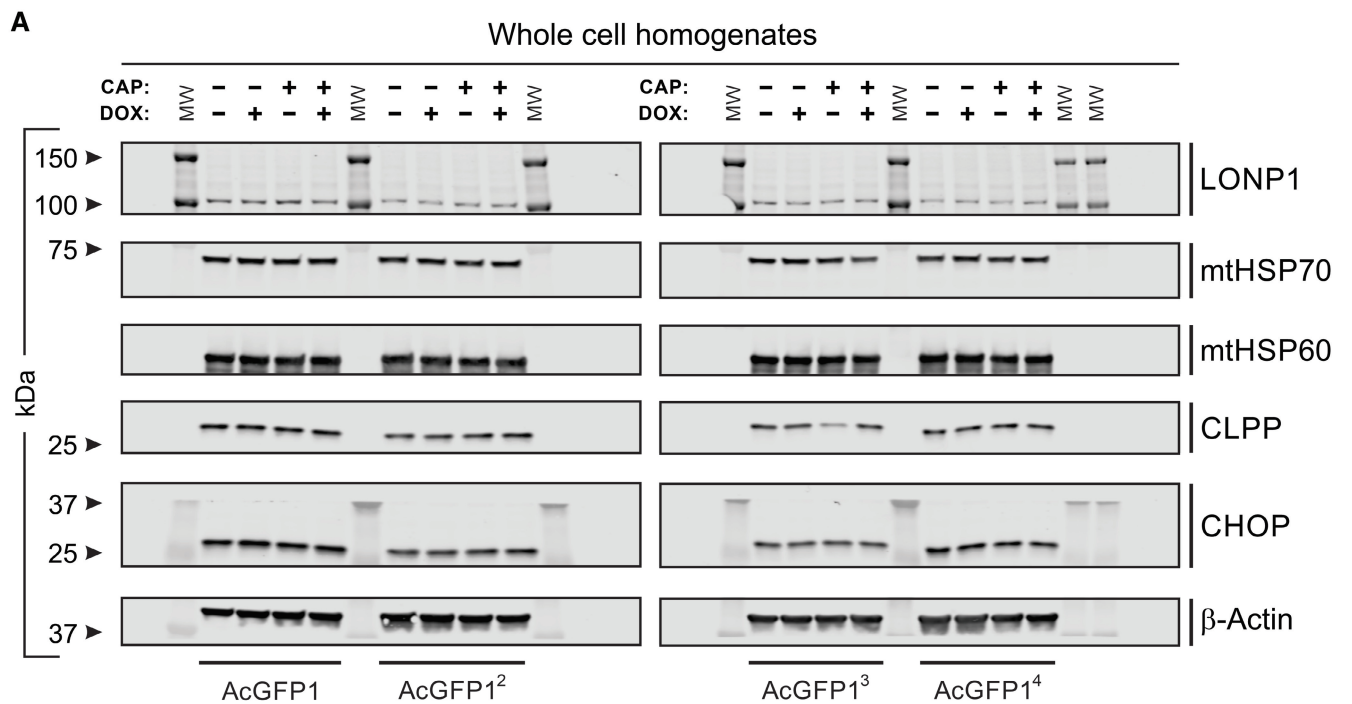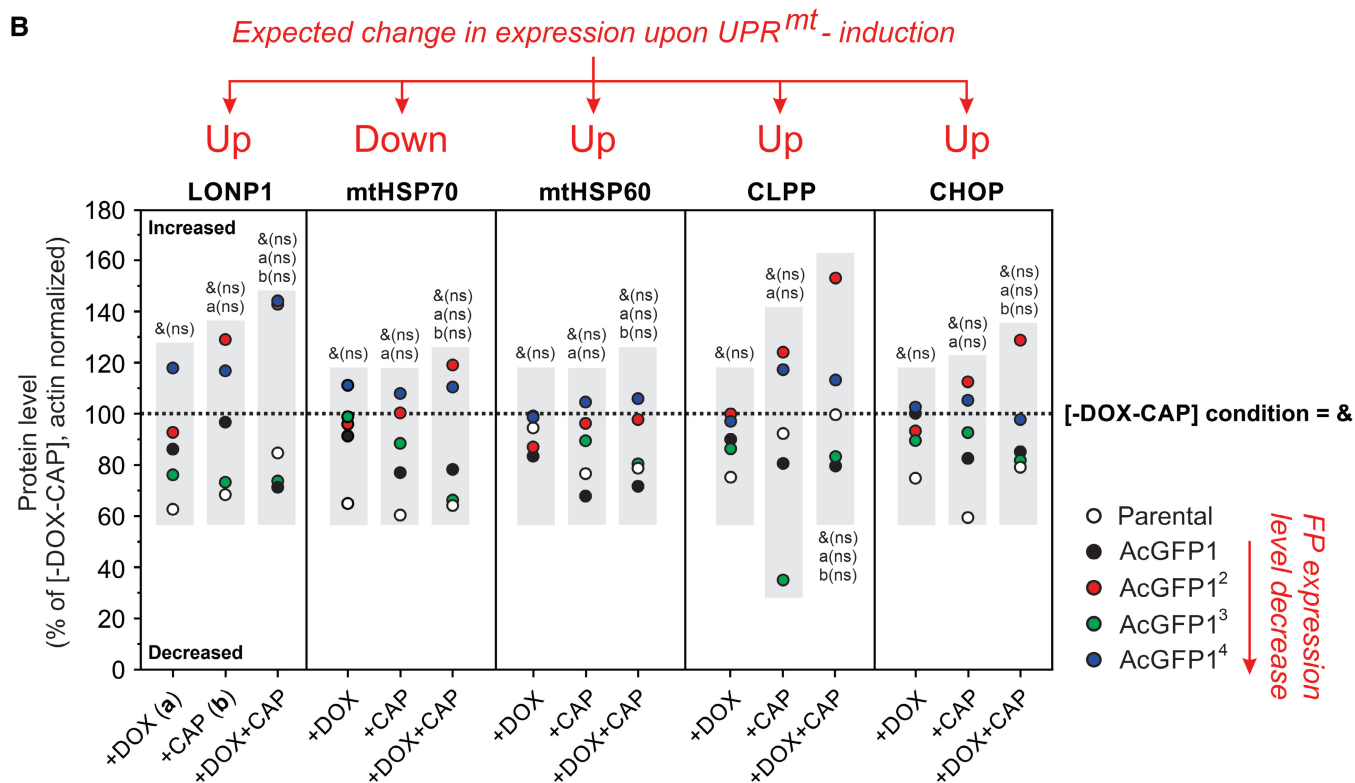

Figure EV3.

## **APPENDIX - TABLE OF CONTENTS**

### **1. Appendix Supplementary Methods [PAGE 2-9]**

- Generation of HeLa cell lines – **PAGE 2**
- Mitochondrial colocalization analysis – **PAGE 2-3**
- Flowcytometry – **PAGE 3**
- Fluorescence recovery after photobleaching experiments – **PAGE 3-4**
- SDS-PAGE, in-gel fluorescence analysis and Western blotting of mitochondrial fractions – **PAGE 4**
- SDS-PAGE and Western blotting of whole-cell lysates – **PAGE 4**
- Oxygen consumption (OCR) and extracellular acidification rate (ECAR) measurements – **PAGE 4-5**
- TMRM measurements – **PAGE 5**
- Quantification of mitochondrial DNA content – **PAGE 5**
- Electron microscopy – **PAGE 5-6**
- Simulation modelling of mitochondrial FRAP experiments – **PAGE 6-7**
- Calculation of solvent viscosity ( $\eta_{\text{solvent}}$ ) from  $D_{\text{solvent}}$  using the He-Niemeyer equation – **PAGE 7-8**
- Calculation of solvent viscosity ( $\eta_{\text{solvent}}$ ) from  $D_{\text{solvent}}$  using the Young equation – **PAGE 8**
- Calculation of solvent viscosity ( $\eta_{\text{solvent}}$ ) from  $D_{\text{solvent}}$  using the Tyn-Gusek equation – **PAGE 8**
- Calculation of solvent viscosity ( $\eta_{\text{solvent}}$ ) from  $D_{\text{solvent}}$  using the Stokes-Einstein equation – **PAGE 8-9**

### **2. Appendix Supplementary Results [PAGE 9-10]**

- Chloramphenicol but not doxycycline induces a glycolytic switch– **PAGE 9**
- Chloramphenicol increases mitochondrial TMRM fluorescence – **PAGE 9**
- Chloramphenicol and doxycycline do not increase the protein levels of mitochondrial unfolded protein response markers – **PAGE 9-10**
- Chloramphenicol does not alter mitochondrial DNA copy number and the level of key mitochondrial fission and fusion proteins – **PAGE 10**
- Predicted level of macromolecules and volume exclusion in the absence and presence of CAP – **PAGE 10**

### **3. Appendix Supplementary Figures [PAGE 11-15]**

- Appendix Figure S1: Original in-gel fluorescence scans and Western blots. – **PAGE 11**
- Appendix Figure S2: Analysis of mitochondrial fluorescence recovery after photobleaching (FRAP) experiments and quantification of mitochondrial radius ( $R_{\text{mito}}$ ) and length ( $L_{\text{mito}}$ ). – **PAGE 12**
- Appendix Figure S3: Synthetic FRAP data generated by the BD model. – **PAGE 13**
- Appendix Figure S4: Original blots for analysis of UPR<sup>mt</sup> proteins in FP-expressing cells. – **PAGE 14**
- Appendix Figure S5: Original blots for analysis of fission/fusion and UPR<sup>mt</sup> proteins in HeLa parental cells. – **PAGE 15**

### **4. Appendix Supplementary Tables [PAGE 16-24]**

- Appendix Table S1: Sequences and MW of the AcGFP1 concatemers – **PAGE 16**
- Appendix Table S2: Experimental  $D_{\text{solvent}}$  values in aqueous solution and in the cell – **PAGE 17-22**
- Appendix Table S3: Interpretation of the data sets in Appendix Table S2 – **PAGE 23**

### **5. Appendix Supplementary References [PAGE 24-27]**

## 1. Appendix Supplementary Materials and methods

**Generation of HeLa cell lines** - AcGFP1 is an inert monomeric fluorescent protein derived from *Aequorea coerulea*, the intense illumination of which is not phototoxic (Bulina *et al.*, 2006; Bell *et al.*, 2007; Dieteren *et al.*, 2008; Dieteren *et al.*, 2011). HeLa cell lines stably expressing AcGFP1 or AcGFP<sup>2</sup> were generated using the same vector constructs as described previously for HEK293 cells (Dieteren *et al.*, 2008). To this end, cDNA of the *cox8* leader sequence (first 210 base pairs of sequence NM\_00004074) was generated by Gateway-adapted PCR procedures according to the manufacturer's instructions (Invitrogen Thermo Fisher, Carlsbad, CA, USA). A *cox8*-entry clone was generated from the resulting PCR product by recombination with pDONR201 (Invitrogen) using Gateway Clonase II Enzyme Mix (Invitrogen). An AcGFP1 destination vector was generated by subcloning the BamHI/NotI restriction fragment of pAcGFP1-N1 (Clontech, Westburg, Leusden, The Netherlands) in-frame behind Gateway Reading Frame Cassette B (Invitrogen) in pcDNA5/FRT/TO (Invitrogen). To obtain an inducible vector containing mitochondrial matrix-targeted AcGFP1, the entry vector was recombined with the AcGFP1 destination vector by using Gateway LR Clonase II Enzyme Mix (Invitrogen). In the same manner, a tandem mitochondrial AcGFP1 expression vector (AcGFP1<sup>2</sup>) was created by first generating an entry vector containing the *cox8* leader sequence linked to the N-terminus of AcGFP1 (without the stop codon) and then recombining this entry clone with the AcGFP1-destination vector. To create a *cox8-cox8*-AcGFP1 entry clone, the *cox8*- sequence of the *cox8*-AcGFP1 entry clone was replaced by a *cox8-cox8* sequence amplified from a "Pericam" vector (Palmer *et al.*, 2004) using the primers: Fwd\_5'aaatttaaGGGCCCAAATAATGATTTTATTTTGA3' and Rev\_5'ataataataACCGGTTTGAGATCTCCCTCCGGCGGCAA3' using the ApaI and AgeI restriction sites for ligation. Accuracy of the vector was confirmed by sequencing. To create a triple AcGFP1 expression vector (AcGFP1<sup>3</sup>), an AcGFP1<sup>3</sup> destination vector was generated by consecutive cloning steps. First, an AcGFP1 fragment was generated by PCR using the primers Fwd\_5'tatataACCGGTATCGATAaaattGCTAGCcatggtgagcaaggcgccgag3' and Rev\_5'tatataaccggtATGCATAacaatt gGATATCcttgtagctcatcatgcc3' on pAcGFP-N1 (Clontech) as a template, and ligated into the AgeI site of the AcGFP1 destination vector, delivering an AcGFP1<sup>2</sup> destination vector. Subsequently, the *cox8-cox8*-AcGFP1 entry clone was recombined with this AcGFP1<sup>2</sup> destination vector using Gateway LR Clonase II Enzyme mix (Invitrogen), generating a *cox8-cox8*-AcGFP1<sup>3</sup> expression vector. Unfortunately, this expression vector displayed suboptimal mitochondrial expression (data not shown). As an alternative strategy, an AcGFP1 fragment was generated by PCR with primers Fwd\_5'tttttGATATCcCGCCGCACCCAGCTTTCTTGT3' and Rev\_5'tttttATGCATgTCGATACCGGTGGATCATCAAC3' with *cox8-cox8*-AcGFP1<sup>3</sup> expression vector as template, and ligated into the EcoRV and NsiI sites of the AcGFP1<sup>2</sup> destination vector. This AcGFP1<sup>3</sup> destination vector was recombined with the *cox8*-entry vector and the *cox8-cox8*-AcGFP1 entry vector using Gateway LR Clonase II Enzyme mix (Invitrogen), generating the AcGFP1<sup>3</sup> and AcGFP1<sup>4</sup> expression vectors used further in this study, respectively. HeLa T-REx Flp-in cells were stably transfected using Superfect Transfection Reagent (Qiagen, Venlo, The Netherlands) according to the manufacturer's protocol and cultured for selection in the presence of 200 µg/ml hygromycin (#10687010; Invitrogen) in Dulbecco's modified Eagle's medium (DMEM; #31966; Gibco Thermo-Fisher, MD, Gaithersburg, USA) supplemented with 10% (v/v) fetal bovine serum (#10270; Gibco), 1% (v/v) penicillin/streptomycin (#15140; Gibco) and 4 µg/ml blasticin (#R21001; Gibco). The DMEM also contained 25 mM D-glucose, 3.97 mM L-Alanyl-L-Glutamine (GlutaMAX) and 1 mM pyruvate. Parental cells were cultured in the presence of 50 µg/ml zeocin (#R25001; Invitrogen) instead of hygromycin. All cell lines were tested for mycoplasma contamination and found negative.

**Mitochondrial colocalization analysis** - HeLa cells were cultured on glass-bottomed WillCo<sup>®</sup> dishes (WillCo Wells B.V., Amsterdam, The Netherlands) and induced with doxycycline (1 µg/ml; 24 h). Next, the cells were incubated with 1 µM MitoTracker Red CM-H2XRos (#M7513; Invitrogen) for 30 min in the dark (37°, 95% air, 5% CO<sub>2</sub>). Then, the cells were washed with a colourless HEPES-Tris (HT) solution



(132 mM NaCl, 4.2 mM KCl, 1 mM CaCl<sub>2</sub>, 1 mM MgCl<sub>2</sub>, 5.5 mM D-glucose and 10 mM HEPES, pH 7.4) and fluorescence microscopy images were acquired using a ZEISS LSM510 Meta confocal microscope (**Carl Zeiss B.V., Sliedrecht, The Netherlands**) using a Plan-Apochromat 63x/1.40 Oil DIC objective (**Carl Zeiss**), a zoom factor of 2 and an optical slice thickness of < 1 μm. AcGFP1 and MitoTracker Red fluorescence signals were collected following excitation at 488 nm (Argon laser; set at 2% transmission) and 543 nm (Helium/Neon laser; 43% transmission), respectively. AcGFP1 fluorescence was detected using a 488nm dichroic mirror and a 500-530 nm band pass filter. MitoTracker Red fluorescence was detected using a 543 nm dichroic mirror and a 560 nm long pass filter.

**Flowcytometry** - HeLa T-REx Flp-in cells were cultured in 24-well plates (#662160; **Cellstar, Greiner Bio-One International GmbH, Alphen aan de Rijn, The Netherlands**). Using half of the wells, expression of AcGFP1 concatemers was induced with doxycycline (1 μg/ml; 24 h). Prior to flowcytometry measurements cells were trypsinized, washed with PBS and resuspended in colourless DMEM (#A14430-01; **Gibco**). Cells were analyzed using a FACSCalibur flow cytometer (**BD Biosciences, Alschwil, Switzerland**) and data was exported to Excel using FloJo software.

**Fluorescence recovery after photobleaching experiments** - For FRAP analysis (e.g. [Lorén \*et al.\*, 2015](#)), cells were seeded in glass-bottomed WillCo® dishes (**WillCo Wells B.V., Amsterdam, The Netherlands**) and grown to ~70% confluence. As a reference, the cox8-AcGFP1-expressing cell line (“AcGFP1”) was included on each day of experiments. Measurements were performed using a ZEISS LSM510 Meta confocal microscope (**Carl Zeiss**) at 20 °C (293K) to minimize mitochondrial movement ([Koopman \*et al.\*, 2006](#); [Dieteren \*et al.\*, 2008](#); [Dieteren \*et al.\*, 2011](#)). Images were acquired at 10 Hz using a Plan-Apochromat 63x oil immersion objective (NA=1.4; **Carl Zeiss**). Pre- and post-bleach imaging was performed using 488 nm excitation light (Argon laser; set at 3% transmission), a 488 nm dichroic mirror and a 505 nm longpass filter. First the pre-bleach fluorescence level was recorded, after which AcGFP1 photobleaching was performed (Argon laser; set at 100% transmission for 100 ms) in a FRAP region of 10x10 pixels (measuring 1.4x1.4 μm). Routinely, a zoom factor of 4 was used and pinhole settings were chosen to achieve an optical thickness of < 2 μm. Only single mitochondria that were fully located within the focal plane were used for analysis (confirmed by an axial scan through the filament). Only mitochondria in which FRAP was paralleled by fluorescence loss in photobleaching (FLIP) in a part distal to the FRAP region were considered to possess a continuous mitochondrial matrix and included in the analysis (**Appendix Fig. S2A-B-C**). In our experiments the size of the FRAP region is relatively large when compared to the size of the mitochondrion. Therefore, the experimental FRAP curves (F(t)) were corrected as described previously ([Goodwin & Kenworthy, 2005](#); [Dieteren \*et al.\*, 2011](#)) using:

$$F(t) = 100 \times \frac{(F(t)_{\text{FRAPregion}} - F(t)_{\text{background}})}{(F(t)_{\text{totalmito}} - F(t)_{\text{background}})} \times \frac{(F_{i,\text{totalmito}} - F_{\text{background}})}{(F_{i,\text{FRAPregion}} - F_{\text{background}})} \quad \text{[Equation-I]}$$

Here the fluorescence intensity in the bleached mitochondrial region ( $F(t)_{\text{FRAPregion}}$ ) and for the total mitochondrion ( $F(t)_{\text{totalmito}}$ ), is background-corrected ( $F(t)_{\text{background}}$ ) at each time point. Next, the corrected fluorescence signal in the bleached region is divided by the corrected intensity of the total mitochondrion to correct for the loss of mitochondrial fluorescence during the bleach. The corrected data are normalized to the background-corrected pre-bleach intensity ( $F_{i,\text{FRAPregion}}$  and  $F_{i,\text{totalmito}}$ ) and multiplied by 100 to yield a percentage of pre-bleach fluorescence (**Appendix Fig. S2**). Applying **[Equation-I]** also corrects for photobleaching induced by normal image acquisition. Mean fluorescence recovery curves were calculated by averaging multiple FRAP recordings from single mitochondria. This averaging improved the signal-to-noise ratio, which facilitated convergence of the Levenberg-Marquardt algorithm ([Levenberg, 1944](#); [Marquardt, 1963](#)) used for fitting of the average FRAP curves with a mono-exponential equation ([Dieteren \*et al.\*, 2011](#)):

$$F(t) = y_0 + A_{\text{mono}} \left( 1 - e^{-\frac{t}{T_{\text{mono}}}} \right) \quad \text{[Equation-II]}$$

With  $T_{\text{mono}}$  representing the FRAP time constant. The mobile fraction ( $F_m$ ) was calculated from the average FRAP curves using:

$$F_m = \frac{F_{\infty} - F_0}{F_i - F_0} \quad \text{[Equation-III]}$$

With  $F_{\infty} = y_0 + A_{\text{mono}}$  being the fluorescence intensity at  $t = t_{\infty}$ .  $F_0$  equals the starting fluorescence level directly after the bleach pulse (as % of the pre-bleach value) and the pre-bleach fluorescence signal ( $F_i$ ) is set at 100% (due to application of [Equation I]).

**SDS-PAGE, in-gel fluorescence analysis and Western blotting of mitochondrial fractions** - Cells were harvested by trypsinization, washed with cold PBS, centrifuged (5 min, 1000 g, 4°C) and resuspended in 250 µL MSE buffer (225 mM mannitol, 75 mM D-sucrose and 1 mM Na-EDTA, pH 7.4) supplemented with 1x protease inhibitor cocktail (#05892791001; **Roche Diagnostics Merck**). Cells were exposed to three cycles of cold (liquid nitrogen) and heat shock (37°C) and homogenized with a micro pestle. Cell debris was pelleted by centrifugation (15 min, 600 g, 4°C). The supernatant was centrifuged at high speed in order to pellet mitochondria (15 min, 10,000 g, 4°C). The mitochondrial pellet was dissolved in 40 µL PBS containing 2% (w/v) β-lauryl maltoside and incubated on ice for 10 minutes. Protein concentrations were determined using Protein Assay Dye Reagent Concentrate (#500-0006; **Bio-Rad Laboratories, Hercules, CA, USA**). Spectrophotometric absorbance was measured at 595 nm in a Benchmark Plus plate reader (**Bio-Rad**). Mitochondrial fractions were run on a 4-15% SDS-PAGE gel. First, the gel (40 µg protein per lane) was used for “in-gel” fluorescence analysis of AcGFP1 using a ChemiDoc MP imaging system (**Bio-Rad**). Next, the same gel was used for Western blotting and immunodetection using a rabbit polyclonal antibody against EGFP (kindly provided by F.J. van Kuppeveld, Dept. of Medical Microbiology, Radboudumc, The Netherlands) and a mouse monoclonal antibody against VDAC1 (#MABN504, 1:1000; **Merck**). Anti-rabbit IRDye800 and anti-mouse IRDye680 (**Li-cor Biosciences, Lincoln, NE, USA**) antibodies were used as secondary antibodies. Blots were scanned using an Odyssey CLx scanner (**Li-cor**).

**SDS-PAGE and Western blotting of whole-cell lysates** - Cells were harvested as described in the previous section. Cell pellets were resuspended in RIPA buffer (50 mM Tris-HCl (pH 7.4), 50 mM NaCl, 1% (v/v) Triton X-100, 5 mM Na<sub>2</sub>EDTA, 10 mM Na<sub>4</sub>P<sub>2</sub>O<sub>7</sub>·10H<sub>2</sub>O, 50 mM NaF, 1x Protease Inhibitor Cocktail (#05892791001; Roche), 1 x PhosStop (#04906845001; Roche) and 100 µg/mL DNase I (#79254; Qiagen)) and incubated on ice for 30 min and vortexed every 5 min. Debris was pelleted by centrifugation (10 min, 13.000 rpm, 4°C) and the supernatant was saved to serve as whole cell lysate. Protein concentrations were determined as described in the previous section. Whole-cell lysates (20-25 µg per lane) were run on a 4-15% SDS-PAGE gel and used for Western blotting and immunodetection using the following antibodies: Rabbit-anti-mtHSP60 (#NBP2-67517; **Novus Biologicals, Centennial, CO, USA**), Mouse-anti-mtHSP70/GRP75/HSPA9B/Mortalin (#NBP1-47801; **Novus**), Mouse-anti-LONP1 (#66043-1-Ig; **Proteintech Europe, Manchester, United Kingdom**), Mouse-anti-CLPP (#WH0008192M1; **Merck/Sigma-Aldrich Chemie N.V., Zwijndrecht, The Netherlands**), Rabbit-anti-CHOP/GADD153 (#NBP2-66856; **Novus**), Mouse-anti-OPA1 (#H00004976-M01; **Abnova, Taipei, Taiwan**), Mouse-anti-DRP1 (DLP1; #611112; **BD Transduction Lab**), Rabbit-anti-MFN2 (#m6444; **Sigma-Aldrich**), Mouse-anti-Porin (Porin/VDAC1; #MABN504; 35-kDa; **Merck Millipore**) and Mouse-anti-beta-actin (#A5441; **Sigma-Aldrich**). Blots were scanned using an Odyssey CLx scanner (**Li-cor**).

**Oxygen consumption rate (OCR) and extracellular acidification rate (ECAR) measurements** - On the day of measurement, a Cell Culture Microplate (#101085-004; **Agilent, Santa Clara, CA, USA**) was coated with Cell-Tak® (#734-1081; **BD Biosciences, San Jose, CA, USA**; 22.4 µg/ml in 0.1 M NaHCO<sub>3</sub>) at 37°C (non CO<sub>2</sub>-corrected atmosphere) for at least 1 h. Next, cells were seeded at a density of 30,000

cells/well (6 replicates for each condition) in non pH-buffered Seahorse medium (DMEM containing 2 mM glutamine, 11 mM D-(+)glucose and 1 mM pyruvate; pH set to 7.4 with NaOH). Next, the plates were placed in an incubator without CO<sub>2</sub> correction for 1 h at 37°C. Using a Seahorse® XFe96 Analyzer (**Agilent**), the oxygen consumption rate (OCR) and extracellular acidification rate (ECAR) were measured for each well. Basal OCR/ECAR was quantified using three cycles (each consisting of 3 min of mixing followed by 3 min of recording). A similar approach was used to subsequently quantify the effects of 1 μM oligomycin (OLI; #75351; **Sigma**), two additions (2 μM and 1 μM) of carbonyl cyanide-p-trifluoromethoxyphenylhydrazone (FCCP; #C2920; **Sigma**) and the combined addition of 1.25 μM rotenone (ROT; #R887; **Sigma**) and 2.5 μM antimycin A (AA; #A8674; **Sigma**). Individual wells with zero OCR values and the corresponding ECAR data points were excluded from the analysis.

**TMRM measurements** - Cells were seeded at a density of 10,000/dish (FluoroDishes®; #FD35-100; **World Precision Instruments Ltd., Friedberg Germany**). Following 24 h of culturing, the DMEM medium was replaced by DMEM containing 40 μg/ml chloramphenicol (CAP; #C0378; **Sigma**). Prior to microscopy analysis, cells were incubated (in the dark; humidified atmosphere; 95% air; 5% CO<sub>2</sub>, 25 min, 37°C) with 15 nM tetramethylrhodamine methyl ester (TMRM; #T668; **Life Technologies Thermo Fisher Scientific, Waltham, MA, USA**) diluted from a DMSO-dissolved stock solution. Directly following this incubation, the cells were placed on the stage of a fully motorized inverted microscope (**Carl Zeiss**; described in detail elsewhere: [Nooteboom \*et al.\*, 2012](#)). Fluorescence images were acquired within 15 min after incubation in the continuous presence of 15 nM extracellular TMRM using an 40x/1.3 NA Plan NeoFluar objective (**Carl Zeiss**), 540 nm excitation light delivered by a monochromator (**TILL Photonics, Gräfelfing, Germany**), a 560 nm dichroic mirror (#XF2017; **Omega, Brattleboro, VT, USA**), a 656 long pass emission filter (XF3085; **Omega**) and a CoolSNAP HD camera (**Roper Scientific, Evry Cedex, France**). For each cell, mitochondrial TMRM fluorescence was manually determined in two regions of interest (ROIs) defined in a mitochondria-dense and nucleoplasmic part of the cell and corrected for background using an ROI outside of the cell (**Fig. EV2D**).

**Quantification of mitochondrial DNA content** - Total DNA was isolated using the QIAamp DNA Mini Kit (**Qiagen, Manchester, UK**), according to the manufacturer's guidelines. DNA was eluted (100 μl elution buffer), and concentration was determined by NanoDrop (Labtech International, UK). To avoid dilution bias ([Malik \*et al.\*, 2011](#)), 30 μl of template DNA at a concentration of 10 ng/μl was fragmented by sonication for 10 min at 38 kHz in a bath sonicator (**Pulsatron 55; Kerry Ultrasonics, London, UK**). Real-time qPCR was used to quantify absolute copy number of mtDNA per cell using primer sequences targeting human mtDNA (hMito) and the human nuclear gene beta-2-microglobulin (hB2M) (see: [Thubron \*et al.\*, 2019](#) for primer sequences). Each 10 μl reaction consisted of 8 μl Master Mix (5 μl 2x Quantifast SYBR Green Master Mix (**Qiagen**), 500 nM forward and reverse primer, made up to volume with RNAase-free water) and 2 μl total DNA. Samples were loaded onto a 96-well plate in triplicate alongside a standard curve consisting of a serial dilution of 10<sup>8</sup>–10<sup>2</sup> copies of primer-specific PCR amplicons. All reactions were performed using the LightCycler 96 Real Time PCR System (**Roche Diagnostics Merck**) and adhering to the MIQE (minimum information for publication of quantitative real-time PCR experiments) guidelines ([Bustin \*et al.\*, 2009](#)). Absolute mtDNA copy number was calculated using the standard curve and is presented as a ratio of mitochondrial (hMito) to nuclear (hB2M) targets, representing cellular mtDNA content as described previously (MtN; [Malik \*et al.\*, 2011](#); [Ajaz \*et al.\*, 2015](#)).

**Electron microscopy** - This approach was adapted from our earlier study ([Koopman \*et al.\*, 2008a](#)). Cells were seeded on Corning 35 mm dishes (430166), induced with doxycycline and optionally treated with CAP as described for the TMRM measurements (see above). Cells were fixed for 1 h in 2% glutaraldehyde in 0.1 M sodium cacodylate buffer (CaCo) and post-fixed for 30 min in 1% osmium tetroxide and 1% potassium ferrocyanide in 0.1 M CaCo. After being washed in buffer, cells were dehydrated in an ascending series of aqueous ethanol and were subsequently transferred via a mixture of ethanol and Epon to pure Epon as embedding medium. Sections of 80 nm were cut parallel to the bottom of the dishes, contrasted with 2%

uranyl acetate, counterstained with lead citrate and examined in a JEOL JEM 1400 electron microscope (JEOL Europe B.V., Nieuw-Vennep, The Netherlands) operating at 80 kV. Mitochondrial length was determined with Fiji software (<https://imagej.net/Fiji>) using the Analyse/Measure option and drawing a line transecting the mitochondrion. The number of cristae was manually counted. Next, for each mitochondrion the number of cristae per  $\mu\text{m}$  was calculated by dividing the number of cristae by mitochondrial length.

**Simulation modelling of mitochondrial FRAP experiments** - Our FRAP analysis demonstrates that all AcGFP1 concatemers are highly mobile within the mitochondrial matrix in the absence of chloramphenicol (*i.e.*  $F_\infty > 91\%$ ; **Table 1**). To allow interpretation of  $T_{\text{mono}}$  in terms of a mitochondrial matrix solvent-dependent solute diffusion constant ( $D_{\text{solvent}}$ ) and calculation of mitochondrial matrix solvent viscosity ( $\eta_{\text{solvent}}$ ; see below), we developed a particle-based Brownian Dynamics (BD) simulation model (*e.g.* **Erban, 2014; Huber & McCammon, 2019**). Fluorescence correlation spectroscopy (FCS) experiments demonstrated that EYFP in the mitochondrial matrix is not affecting its own diffusion up to a concentration of  $10 \mu\text{M}$  (**Willems *et al.*, 2009**). Therefore, in the BD model we routinely used an FP concentration ( $C_p$ ) of  $10 \mu\text{M}$  and assumed that FPs move independently. Given the fact that AcGFP1 is an inert monomeric protein (**Bulina *et al.*, 2006; Bell *et al.*, 2007**), with no known binding partners, it was further assumed that AcGFP1 does not bind to the MIM (*i.e.* individual FP molecules display reflections at the MIM). In BD simulations, the three dimensional (3D) position  $\mathbf{r}_i$  of the  $i^{\text{th}}$  particle as a function of time  $t$  is integrated over a time step  $\Delta t$  according to:

$$\mathbf{r}_i(t + \Delta t) = \mathbf{r}_i(t) + \sqrt{2D_{\text{solvent}}\Delta t}\boldsymbol{\theta}_i(t) \quad \text{[Equation-IV]}$$

where the three components to the random vector  $\boldsymbol{\theta}_i(t)$  have zero mean, unit standard deviation and are devoid of correlations (Markovian). The diffusion coefficient was varied between  $0.5$  and  $50 \mu\text{m}^2/\text{s}$  and the time step was set at  $\Delta t = 10^{-5} \mu\text{m}^2/D_{\text{solvent}}$  across all simulations. The mitochondrion was modelled as a cylinder with a radius  $R_{\text{mito}}$  and a length  $L_{\text{mito}}$ . (**Appendix Fig. S3A**). These parameters were experimentally determined (**Table 1**) by intensity profile analyses as described previously (see: **Willems *et al.*, 2009** and **Appendix Fig. S2F**). In order to account for diffusion hindrance by mitochondrial cristae (**Ölveczky *et al.*, 1998; Partikian *et al.*, 1998; Dieteren *et al.*, 2011**), we performed EM analysis of mitochondrial ultrastructure (**Fig. 5A** and **Table 1**). Based upon this analysis and information in the literature (**Appelhans *et al.*, 2011; Wilkens *et al.*, 2012; Wolf *et al.*, 2019; Segawa *et al.*, 2020; Hu *et al.*, 2020; Weissert *et al.*, 2021**) it was assumed in the model that: (1) mitochondria contained regularly arranged cristae of negligible thickness perpendicular to the longitudinal axis of the mitochondrion, (2) the orientations of the cristae alternated, with consecutive cristae blocking  $-R_{\text{mito}} \leq z \leq -R_{\text{mito}} + h$  and  $R_{\text{mito}} - h \leq z \leq R_{\text{mito}}$ , respectively, with  $h$  being the length of each crista (**Appendix Fig. S3A**). The presence of cristae increased the effective length of the “channel” that connected the two ends of the mitochondrion thereby increasing FP diffusion length (**Dieteren *et al.*, 2011**). In addition, the presence of cristae reduced the diffusive flow between consecutive mitochondrial sub-compartments. All flat and cylindrical walls were implemented using the appropriate bounce-back rules and it was verified that these rules conserved a uniform density near all surfaces. Simulations were initiated by randomly distributing FP-representing particles throughout the mitochondrial matrix volume. During the bleaching phase of the simulation (lasting  $0.1$  s; identical to experiments), all particles within the FRAP region ( $S_{\text{FRAP}} = 1.4 \mu\text{m}$ ; identical to experiments) at one end of the cylinder were bleached. In the subsequent recovery simulation, the number of unbleached particles in this region was monitored to compute the FRAP signal. The generated FRAP curves were averaged over ten independent simulations (*e.g.* **Appendix Fig. S3B-C**). These average curves were fitted with the same mono-exponential equation (**[Equation-II]**) as the experimental data to extract  $T_{\text{mono}}$ . This also allowed calculation of  $F_m$  and  $F_\infty$  (as explained above). Analysis of the simulated FRAP data demonstrated that each curve ultimately converged to an  $F_\infty$  value of  $1.0$  (*i.e.*  $100\%$  fluorescence recovery; equalling  $F_m$  and  $F_\infty$  values of  $1$ ). To compute  $D_{\text{solvent}}$  from the experimental  $T_{\text{mono}}$  values,  $\text{LOG}_{10}(D_{\text{solvent}})$  was plotted as a function of  $\text{LOG}_{10}(T_{\text{mono}})$  for the simulated FRAP curves and fitted with a straight line (**Fig. 3D** and **Appendix Fig. S3D**):



$$\text{LOG10}(D_{\text{solvent}}) = A + B \cdot \text{LOG10}(T_{\text{mono}}) \quad \text{[Equation-V]}$$

This yields values for A (intercept) and B (slope), which allows calculation of  $D_{\text{solvent}}$  by inserting the experimental  $T_{\text{mono}}$  value.

**Calculation of solvent viscosity ( $\eta_{\text{solvent}}$ ) from  $D_{\text{solvent}}$  using the He-Niemeyer equation** - This equation is a modified Stokes-Einstein relationship that quantitatively links  $D_{\text{solvent}}$  and  $\eta_{\text{solvent}}$  for freely diffusing spherical and cylindrical molecules (He & Niemeyer, 2003). We have previously applied this equation in our FRAP analysis of matrix-diffusing AcGFP1 and AcGFP1<sup>2</sup> in HEK293 cells (Dieteren *et al.*, 2011):

$$D_{\text{solvent}} = \frac{6.85 \cdot 10^{-8} T}{\eta_{\text{solvent}} \sqrt{MW^{\frac{1}{3}} \cdot R_G}} \quad \text{[Equation-VI]}$$

With T = temperature (in K; 293 K = 20 °C),  $\eta_{\text{solvent}}$  = solvent viscosity (in cP; 1 cP = 10<sup>-3</sup> Pa·s), MW = solute molecular weight (in g/mol),  $D_{\text{solvent}}$  = solvent-dependent diffusion constant (in cm<sup>2</sup>/s; 1.0 cm<sup>2</sup>/s = 1.0x10<sup>8</sup> μm<sup>2</sup>/s), and  $R_G$  = radius of gyration (in Angstrom; Å; 1 Å = 1.0x10<sup>-10</sup> m). Here we used [Equation-VI] to calculate  $\eta_{\text{solvent}}$  from  $D_{\text{solvent}}$  by rewriting as follows:

$$\eta_{\text{solvent}} = \frac{6.85 \cdot 10^{-8} T}{D_{\text{solvent}} \sqrt{MW^{\frac{1}{3}} \cdot R_G}} \quad \text{[Equation-VII]}$$

For calculating  $\eta_{\text{solvent}}$ , the values of T (=293K), MW (determined using the protein sequence; Appendix Table S1) and  $D_{\text{solvent}}$  (from the BD model) are known. This means that  $R_G$  needs to be determined for each AcGFP1 concatemer. Assuming that AcGFP1 displays a (minimal) spherical conformation, its  $R_G$  value can be calculated from the hydrodynamic radius ( $R_H$ ) according to (Dashevskaya *et al.*, 2008):

$$R_G = \sqrt{\frac{3}{5}} \cdot R_H = 0.775 \cdot R_H \quad \text{[Equation-VIII]}$$

For AcGFP1,  $R_H = 20\text{Å}$  (Terry *et al.*, 1995; Arrio-Dupont *et al.*, 2000; Lavalette *et al.*, 2006) so  $R_G = 15.5\text{Å}$ , compatible with molecular modelling results for GFP (Dashevskaya *et al.*, 2008). Inspection of the GFP crystal structure (Yang *et al.*, 1996) predicts an AcGFP1 radius (R) and length (L) of 15Å and 40Å, respectively (Figure EV1A). Because AcGFP1<sup>2</sup>, AcGFP1<sup>3</sup> and AcGFP1<sup>4</sup> may assume a non-spherical shape in the mitochondrial matrix solvent, [Equation-VIII] cannot be applied to determine their  $R_G$  value. In principle, AcGFP1<sup>2</sup>, AcGFP1<sup>3</sup> and AcGFP1<sup>4</sup> can assume two extreme configurations: “compact” and “extended” (Figure EV1B-G). In their extended configuration, we assumed the AcGFP1 concatemer structure to be cylindrical. For a rigid cylinder, the  $R_G$  about its centroidal x-axis or y-axis is given by:

$$R_G = \frac{\sqrt{9 \cdot R^2 + 3 \cdot L^2}}{6} \quad \text{[Equation-IX]}$$

In which R is the radius and L is the length of the cylinder. In case of AcGFP1<sup>2</sup>, its two AcGFP1 molecules are connected by a 14 AA linker (Appendix Table S1). For the compact AcGFP1<sup>2</sup> configuration R = 20Å, L = 60Å and  $R_G = 20.0\text{Å}$  (Table 1 and Figure EV1B). When maximally stretched out, this linker has a length of 50.4Å (Minier & Sigel, 2004). This means that for the extended AcGFP1<sup>2</sup> configuration R = 15Å, L = 130Å and  $R_G = 38\text{Å}$  (Figure EV1C). Similar calculations were carried out for AcGFP1<sup>3</sup> and AcGFP1<sup>4</sup> (Table 1) yielding  $R_G$  values of 20Å (AcGFP1<sup>3</sup>-compact), 73Å (AcGFP1<sup>3</sup>-extended), 20Å (AcGFP1<sup>4</sup>-

compact) and 102Å (AcGFP1<sup>4</sup>-extended). Inserting T,  $D_{\text{solvent}}$ , MW and  $R_G$  in [Equation-VII] was used to calculate  $\eta_{\text{solvent}}$  for each AcGFP1 concatemer (**Table 1**).

**Calculation of solvent viscosity ( $\eta_{\text{solvent}}$ ) from  $D_{\text{solvent}}$  using the Young equation** - The Young equation (**Young, 1980**) predicts  $\eta_{\text{solvent}}$  from  $D_{\text{solvent}}$  based upon the MW of the solute:

$$D_{\text{solvent}} = 8.34 \times 10^{-8} \left( \frac{T}{\eta_{\text{solvent}} \cdot \text{MW}^{\frac{1}{3}}} \right) \quad \text{[Equation-X]}$$

equalling:

$$\eta_{\text{solvent}} = 8.34 \times 10^{-8} \left( \frac{T}{D_{\text{solvent}} \cdot \text{MW}^{\frac{1}{3}}} \right) \quad \text{[Equation-XI]}$$

With: T = temperature (in K),  $\eta_{\text{solvent}}$  = solvent viscosity (in cP), MW = solute molecular weight (in g/mol),  $D_{\text{solvent}}$  = solvent-dependent diffusion constant (in cm<sup>2</sup>/s).

**Calculation of solvent viscosity ( $\eta_{\text{solvent}}$ ) from  $D_{\text{solvent}}$  using the Tyn-Gusek equation** - This approach allows prediction of  $\eta_{\text{solvent}}$  from  $D_{\text{solvent}}$  and  $R_G$  (**Tyn & Gusek, 1990**):

$$D_{\text{solvent}} = 5.78 \times 10^{-8} \left( \frac{T}{\eta_{\text{solvent}} \cdot R_G} \right) \quad \text{[Equation-XII]}$$

equalling:

$$\eta_{\text{solvent}} = 5.78 \times 10^{-8} \left( \frac{T}{D_{\text{solvent}} \cdot R_G} \right) \quad \text{[Equation-XIII]}$$

With T = temperature (in K),  $\eta_{\text{solvent}}$  = solvent viscosity (in cP),  $D_{\text{solvent}}$  = solvent-dependent diffusion constant (in cm<sup>2</sup>/s),  $R_G$  = solute radius of gyration (in Å).

**Calculation of solvent viscosity ( $\eta_{\text{solvent}}$ ) from  $D_{\text{solvent}}$  using the Stokes-Einstein equation** - The Stokes-Einstein equation describes the diffusion of spherical particles through a liquid (**Einstein, 1905; Sutherland, 1905; von Smoluchowski, 1906**):

$$D_{\text{solvent}} = \frac{\kappa_B \cdot T}{6 \cdot \pi \cdot \eta_{\text{solvent}} \cdot R_H} \quad \text{[Equation-XIV]}$$

equalling:

$$\eta_{\text{solvent}} = \frac{\kappa_B \cdot T}{6 \cdot \pi \cdot D_{\text{solvent}} \cdot R_H} \quad \text{[Equation-XV]}$$

With T = temperature (in K),  $\eta_{\text{solvent}}$  = solvent viscosity (in Pa·s; 1 Pa·s = 10<sup>3</sup> cP),  $D_{\text{solvent}}$  = solvent-dependent diffusion constant (in m<sup>2</sup>/s; 1.0 m<sup>2</sup>/s = 1.0x10<sup>12</sup> μm<sup>2</sup>/s),  $\kappa_B$  = Boltzmann's constant (1.38065x10<sup>-23</sup> J/K),  $R_H$  = solute hydrodynamic radius (in m). For AcGFP1,  $R_H$  = 20Å was taken from the literature (**Terry *et al.*, 1995; Arrio-Dupont *et al.*, 2000; Lavalette *et al.*, 2006**). The other AcGFP1 concatemers in their compact and extended configurations (**Figure EV1B-G**) were modelled as prolate ellipsoids (**Perrin, 1936**). In this case their  $R_H$  is given by:



$$R_H = \frac{\sqrt{(a^2-b^2)}}{\ln\left(\frac{a+\sqrt{(a^2-b^2)}}{b}\right)} \quad \text{[Equation-XVI]}$$

With  $a$  = major semi-axis of the ellipse =  $L/2$ ;  $b$  = minor semi-axis of the ellipse =  $R$ ;  $L$  = length of major axis of the ellipsoid (in Å);  $R$  = length of minor axis of the ellipsoid (in Å).

## 2. Appendix Supplementary Results

**Chloramphenicol but not doxycycline induces a glycolytic switch** - To allow interpretation of the observed CAP effects on FP diffusion in a functional context, we first studied the oxygen consumption rate (OCR) and extracellular acidification rate (ECAR) in HeLa parental cells (Divakaruni *et al.*, 2022). The incubation protocols were identical to those used for FP-induced cells (“+DOX” condition: 1 µg/ml; 24 h) and CAP-treatment of FP-induced cells (*i.e.* “+DOX+CAP”: 40 µg/ml CAP for 48 h, followed by 40 µg/ml CAP + 1 µg/ml DOX for 24 h). As a control, we also determined the effect of CAP itself (“+CAP”: 40 µg/ml for 72 h). After recording basal OCR/ECAR values, various chemicals were added (Figure EV2A-B) to inhibit the  $F_0F_1$ -ATPase (oligomycin; OLI), induce mitochondrial uncoupling (FCCP) and inhibit OXPHOS complex I (rotenone; ROT) and complex III (antimycin A; AA). Basal and maximal OCR were slightly increased in the +DOX condition and greatly reduced in the +CAP and +DOX+CAP condition (Figure EV2C). Basal ECAR was slightly increased in the +DOX condition and greatly increased in the +CAP and +DOX+CAP condition (Figure EV2C). Basal/maximal OCR and basal ECAR values did not significantly differ between the +CAP and +DOX+CAP condition (Figure EV2C). Taken together, these results demonstrate that DOX treatment does not inhibit mitochondrial oxygen consumption. In contrast, CAP reduces mitochondrial respiration and increases ECAR, suggesting induction of a glycolytic switch, which was not affected by DOX.

**Chloramphenicol increases mitochondrial TMRM fluorescence** - Given the central role of the electron transport chain (ETC) in sustaining the mitochondrial membrane potential ( $\Delta\psi$ ), it was next determined whether CAP affected the accumulation of the fluorescent cation TMRM, which can be used as a semi-quantitative readout of  $\Delta\psi$  (Koopman *et al.*, 2008b). It was found that CAP treatment of HeLa parental cells increased and decreased the mitochondrial and nuclear TMRM fluorescence, respectively (Figure EV2D). This suggest that CAP treatment induces  $\Delta\psi$  hyperpolarization.

**Chloramphenicol and doxycycline do not increase the protein levels of mitochondrial unfolded protein response markers** - Evidence in the literature suggests that CAP and DOX can induce the mitochondrial unfolded protein response (UPR<sup>mt</sup>), which is classically linked to the accumulation of misfolded proteins in the mitochondrial matrix (Houtkooper *et al.*, 2013; Moullan *et al.*, 2015; Shpilka and Haynes, 2018). In this way, the observed effects on FP mobility might be due to a CAP- and/or DOX-induced accumulation of unfolded proteins in the mitochondria matrix. UPR<sup>mt</sup> activation is characterized by upregulation of nuclear genes that encode mitochondrial stress proteins (Zhao *et al.*, 2002). The latter include mitochondrial heat shock protein 60 (mtHSP60) and the mitochondrial ATP-dependent Clp protease proteolytic subunit (CLPP). MtHSP60 promotor activity is controlled by the DNA damage-inducible transcript 3 protein (CHOP/CHOP-10/DDIT3) transcription factor. However, CHOP is also involved in the endoplasmic reticulum unfolded protein response (UPR<sup>ER</sup>) and therefore not UPR<sup>mt</sup> specific (Zhao *et al.*, 2002). In addition, UPR<sup>mt</sup> activation was previously linked to increased protein levels of the mitochondrial Lon Peptidase 1 (LONP1; Xu *et al.*, 2016) and reduced function of mitochondrial heat shock protein 70 (mtHSP70/mortalin; Burbulla *et al.*, 2014). Analysis of HeLa parental cells (Figure EV2E) and FP-expressing cells (Figure EV3A) revealed no changes in the above protein levels upon treatment with DOX, CAP or DOX+CAP. For statistical analysis we reasoned that if DOX and/or CAP would affect the

level of the UPR<sup>mt</sup>-linked proteins, the effect on the expression pattern of these proteins should be similar in all five HeLa cell lines (*i.e.* parental and four FP-expressing). This analysis revealed no UPR<sup>mt</sup>-characteristic changes in the expression pattern of LONP1, mtHSP70, CLPP and CHOP (**Figure EV3B**). These results suggest that UPR<sup>mt</sup> activation is not responsible for the CAP-induced increase in  $D_{\text{solvent}}$ .

**Chloramphenicol does not alter mitochondrial DNA copy number and the level of key mitochondrial fission and fusion proteins** - Within cells, mtDNA is associated in nucleoprotein complexes (“nucleoids”) and evidence in *E. coli* demonstrated that nucleoids undergo changes in shape and compaction upon CAP treatment (**Van Helvoort *et al.*, 1996**). Mitochondrial cristae structure also appears to compartmentalize nucleoids thereby preventing their free matrix diffusion (**Nicholls & Gustafsson, 2018**). Substantial nucleoid aggregation was observed upon loss of specific isoforms of the key MIM fusion protein Optic atrophy protein 1 (OPA1), which controls cristae structure and might be involved in mtDNA to MIM attachment (**Elachouri *et al.*, 2011**). Moreover, CAP prevented stress-induced OPA1 processing during dysfunction of the mitochondrial AAA protease AFG3L2 (**Richter *et al.*, 2019**). In this way, alterations in mtDNA and/or OPA1 level/processing might affect solute diffusion in CAP-treated cells. Here we observed that CAP treatment did not affect mtDNA copy number in HeLa parental cells (**Figure EV2F**). Similarly, the level of OPA1 and two other key MOM fission/fusion proteins (DRP1, MFN2) was not affected by CAP (**Figure EV2G**). This demonstrates that the observed CAP-induced increase in  $D_{\text{solvent}}$  is not linked to alterations in the levels of mtDNA, OPA1, DRP1 or MFN2.

**Predicted level of macromolecules and volume exclusion in the absence and presence of CAP** - To obtain an semiquantitative estimate of the degree of macromolecular crowding within the mitochondrial matrix solvent of HeLa cells, we used human serum albumin (HSA) as a theoretical crowding agent. The MW of hydrated HSA equals 91.675 kDa (*i.e.*  $91.675 \times 10^3$  g/mol). Structurally, hydrated HSA is a prolate ellipsoid with semi-diameters:  $a = 8.2$  nm and  $b = 2.1$  nm. Computing the volume of this ellipsoid ( $V_{\text{ellipsoid,prolate}} = (4/3) \cdot \pi \cdot b^2 \cdot a$ ) yields a HSA molecular volume of  $151 \text{ nm}^3$  (*i.e.*  $1.51 \cdot 10^{-22}$  l). The total volume of the mitochondrial matrix ( $V_{\text{mito}}$ ) equals  $\approx 8.0 \cdot 10^{-16}$  l (**Table 1**). This means that  $\approx 5.28 \cdot 10^6$  HSA molecules will fit in the mitochondrial matrix.

- *In the absence of CAP*, the matrix solvent viscosity ( $\eta_{\text{solvent}}$ ) was maximally 4.57 cP (**Fig. 4C**). At 20° C this viscosity value was reached at HSA concentrations of  $\approx 198 \text{ kg/m}^3$  in distilled water (**Monkos, 2004**). This concentration equals  $198/91.675 \cdot 10^3 = 2.16 \cdot 10^{-3}$  mol and  $2.16 \cdot 10^{-3} \times 6.0221 \cdot 10^{23} (N_A) = 1.30 \cdot 10^{21}$  molecules/l. With a  $V_{\text{mito}}$  of  $8.0 \cdot 10^{-16}$  l this equals a total number of  $1.30 \cdot 10^{21} \times 8.0 \cdot 10^{-16} = 1.04 \cdot 10^6$  molecules. These molecules occupy a volume fraction of  $1.04 \cdot 10^6 / 5.28 \cdot 10^6 = 19.7\%$  of the total mitochondrial matrix volume.

*In CAP-treated cells*  $\eta_{\text{solvent}}$  increased to a maximal value of 37.5 cP (**Fig. 5G**), being equivalent to a HSA concentration of  $\approx 328 \text{ kg/m}^3$  (**Monkos, 2004**). These concentrations are equivalent to  $1.72 \cdot 10^6$  molecules in the mitochondrial matrix, which suggests that in the presence of CAP 32.7% of the total mitochondrial matrix volume is occupied by proteins. The HSA-occupied volume is not accessible by other molecules, a phenomenon described as the “excluded volume” effect (**Minton, 1981**). In this sense, the predicted HSA volume fractions in the absence and presence of CAP agree with those reported in *E. Coli* being between 5% and 40% of the cell volume (**Akabayov *et al.*, 2013**).

### 3. Appendix Supplementary Figures

#### A. Without chloramphenicol (-CAP)

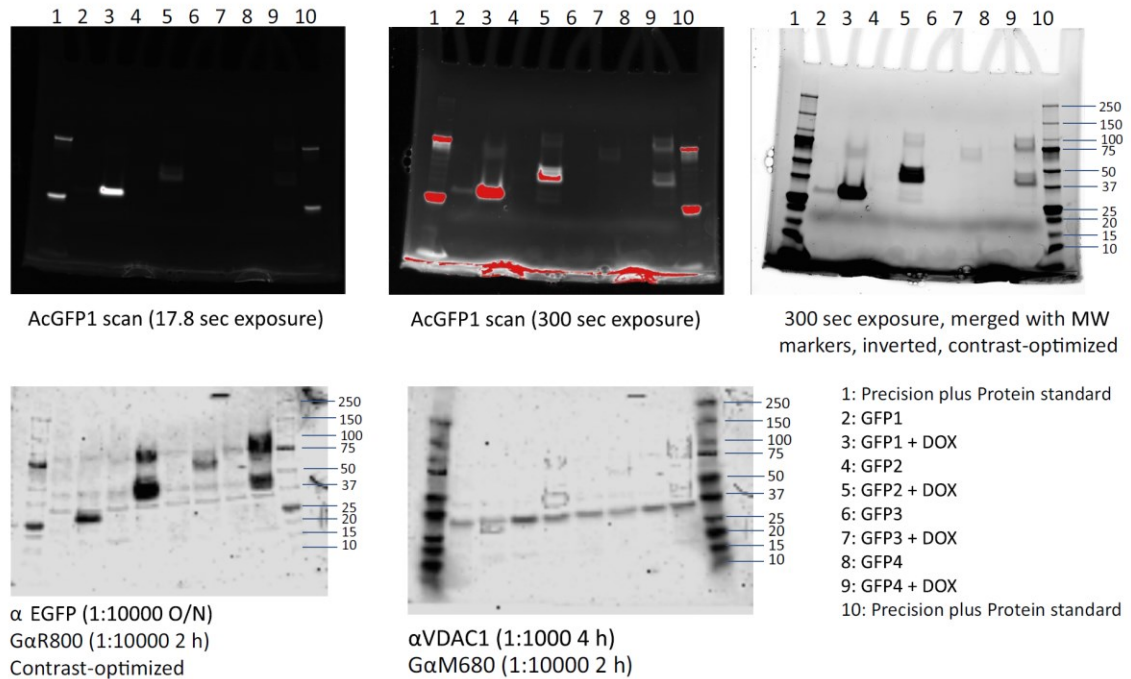

#### B. With chloramphenicol (+CAP)

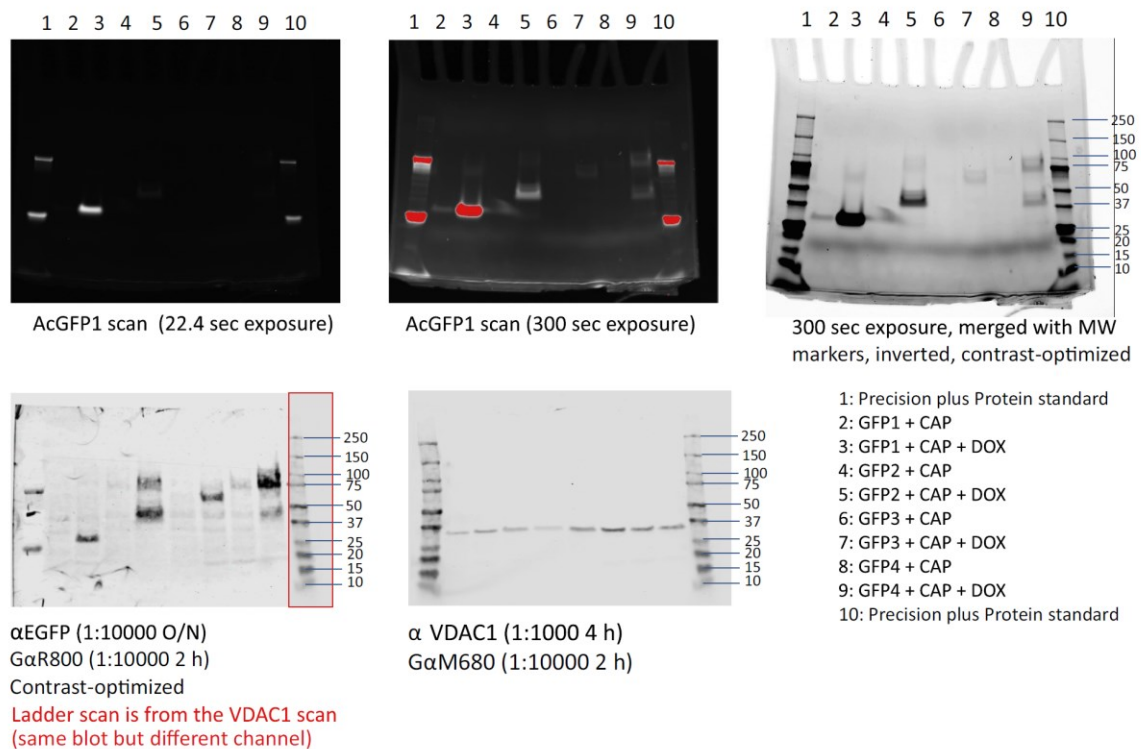

**Appendix Figure S1: Original in-gel fluorescence scans and Western blots.** The data in panel A was used to create **Fig. 2B**. The data in panel B is virtually identical to panel A, but was obtained for cells cultured in the presence of chloramphenicol (CAP).

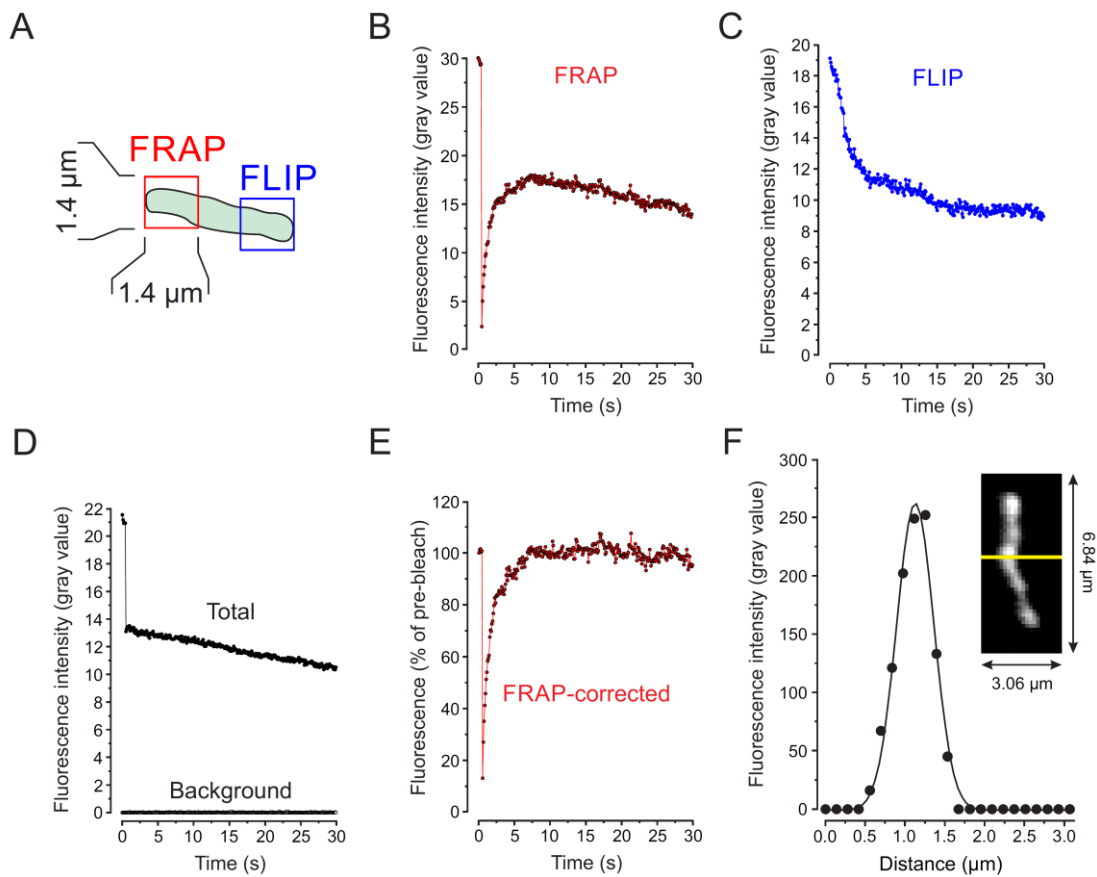

**Appendix Figure S2: Analysis of mitochondrial fluorescence recovery after photobleaching (FRAP) experiments and quantification of mitochondrial radius ( $R_{\text{mito}}$ ) and length ( $L_{\text{mito}}$ ).** In this typical example, a FRAP recording from a mitochondrion in a mitochondria-targeted AcGFP1-expressing HeLa cell is presented. **(A)** Geometry of the FRAP experiment. Two regions of interest (ROIs) were placed on both ends of the mitochondrion. AcGFP1 photobleaching was performed using a 1.4x1.4 μm FRAP region. Only single mitochondria that were fully located within the focal plane were used for analysis (confirmed by an axial scan). Only mitochondria in which FRAP was paralleled by fluorescence loss in photobleaching (FLIP) in a part distal to the FRAP region were considered to possess a continuous mitochondrial matrix and included in the analysis. **(B)** Time course of the fluorescence signal in the FRAP region. First, a pre-bleach fluorescence level was recorded, after which AcGFP1 was photobleached (fast signal drop) and fluorescence recovery (slower increase) was measured. **(C)** Time course of the fluorescence signal in the FLIP region. **(D)** Fluorescence signal in a ROI placed just outside the mitochondrion (“Background”) and a rotated rectangular ROI around the complete mitochondrion (“Total”). **(E)** Time course of the corrected FRAP curve. In our experiments the size of the FRAP region is relatively large in comparison to the total size of the mitochondrion. Therefore, the experimental FRAP curve in panel B was corrected using the information in panel C and D using **[Equation-I]**. This also corrects for photobleaching during image acquisition (visible in panel D; total signal). **(F)** Determination of mitochondrial diameter ( $D_{\text{mito}}$ ) from confocal microscopy fluorescence images (Willems *et al.*, 2009). Mitochondrial diameter  $D_{\text{mito}}$  (equalling  $2 \cdot R_{\text{mito}}$ ) was assessed by quantifying the intensity of a 1 pixel wide profile perpendicular to the long axis of the mitochondrial filament (yellow line; image was linearly contrast stretched for visualization purposes). The width ( $w$ ) of this profile at its half-maximal height is determined by fitting a Gaussian curve:  $y = y_0 + \{A / [w \cdot \sqrt{(\pi/2)}]\} \cdot \text{EXP}\{-2 \cdot [(x - x_c)^2 / w^2]\}$ . For the given example this yielded  $w = 0.469 \mu\text{m}$  (*i.e.*  $R_{\text{mito}} = 0.248 \mu\text{m}$ ) and  $R^2 = 0.988$ . A similar strategy was used to determine mitochondrial length ( $L_{\text{mito}}$ ) by analysing the intensity profile along the length axis of the mitochondrion.

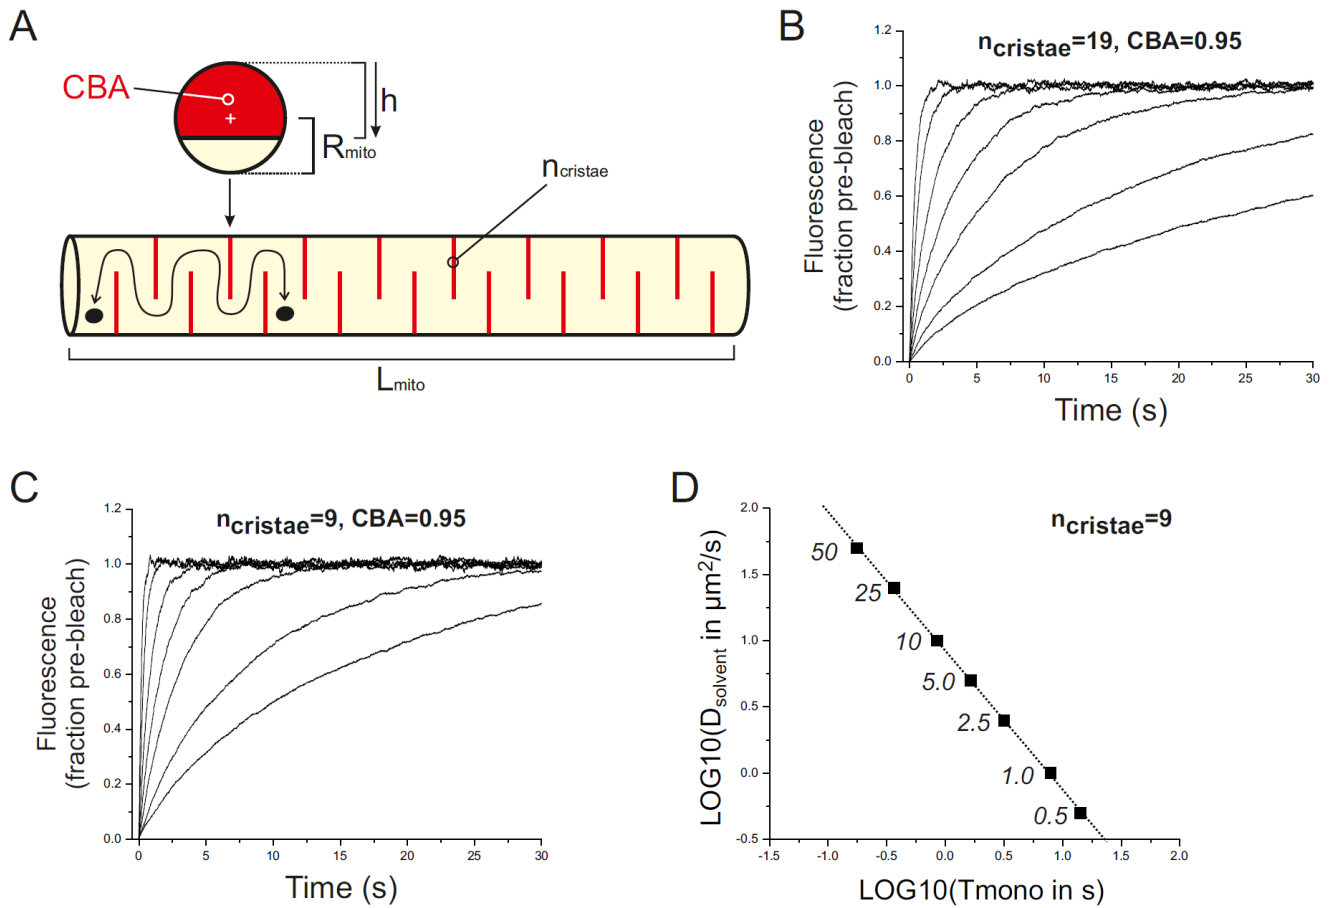

**Appendix Figure S3: Synthetic FRAP data generated by the BD model.** (A) Geometry of the BD model. See **Appendix** and **Results** for details. (B) Simulated FRAP curves for different values of the solvent-dependent diffusion constant ( $D_{\text{solvent}}$ ; see panel D for exact values in  $\mu\text{m}^2/\text{s}$ ). The number of cristae/mito ( $n_{\text{cristae}}$ ) equalled 19. The cristae-blocked area (CBA) equalled 0.95. (C) Same as panel B but now for  $n_{\text{cristae}} = 9$  and CBA=0.95. (D) Linear relationship [Equation-VI] between the FRAP recovery time constant ( $T_{\text{mono}}$ ) and the  $D_{\text{solvent}}$  value (logarithmic scale) for the data in panel C ( $R=-0.999$ ,  $p<0.0001$ ; A(intercept)= $0.923\pm 0.00569$ (SE); B(slope)=  $-1.05\pm 0.00841$  (SE)).



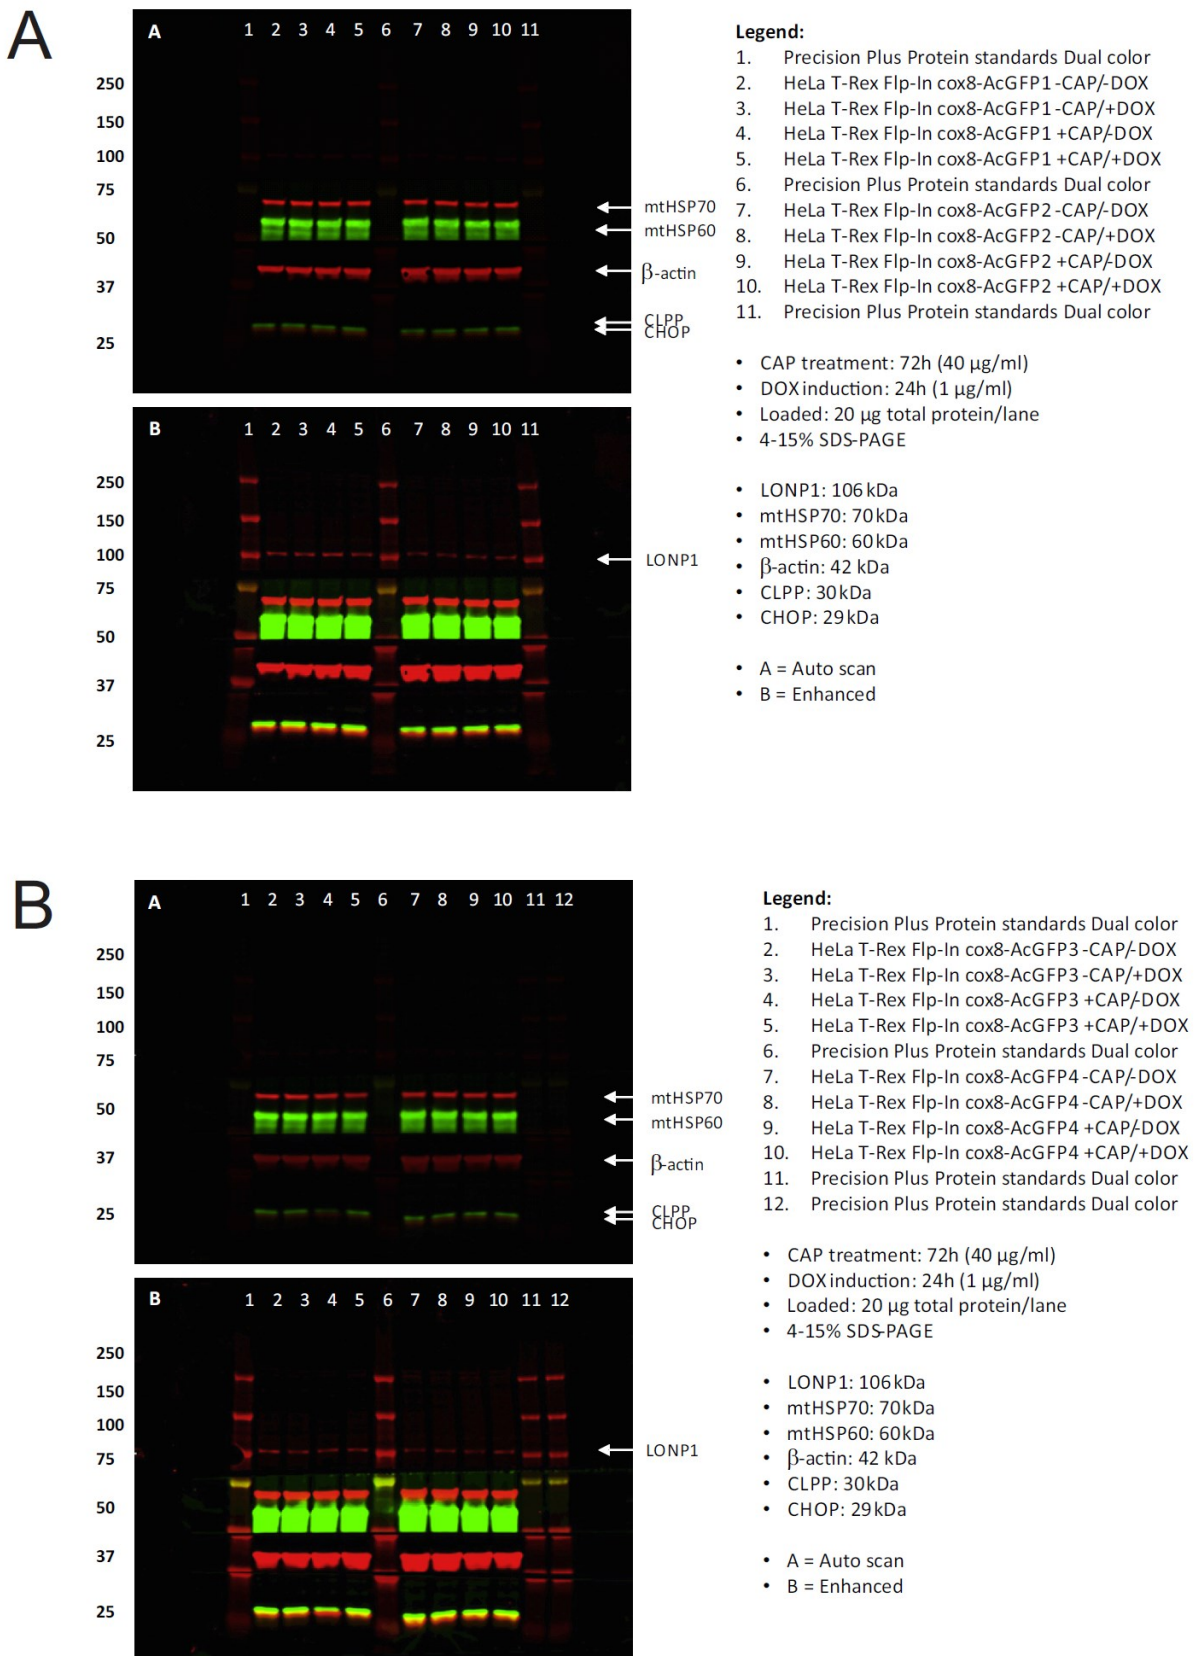

**Appendix Figure S4: Original blots for analysis of UPR<sup>mt</sup> proteins in FP-expressing cells.**



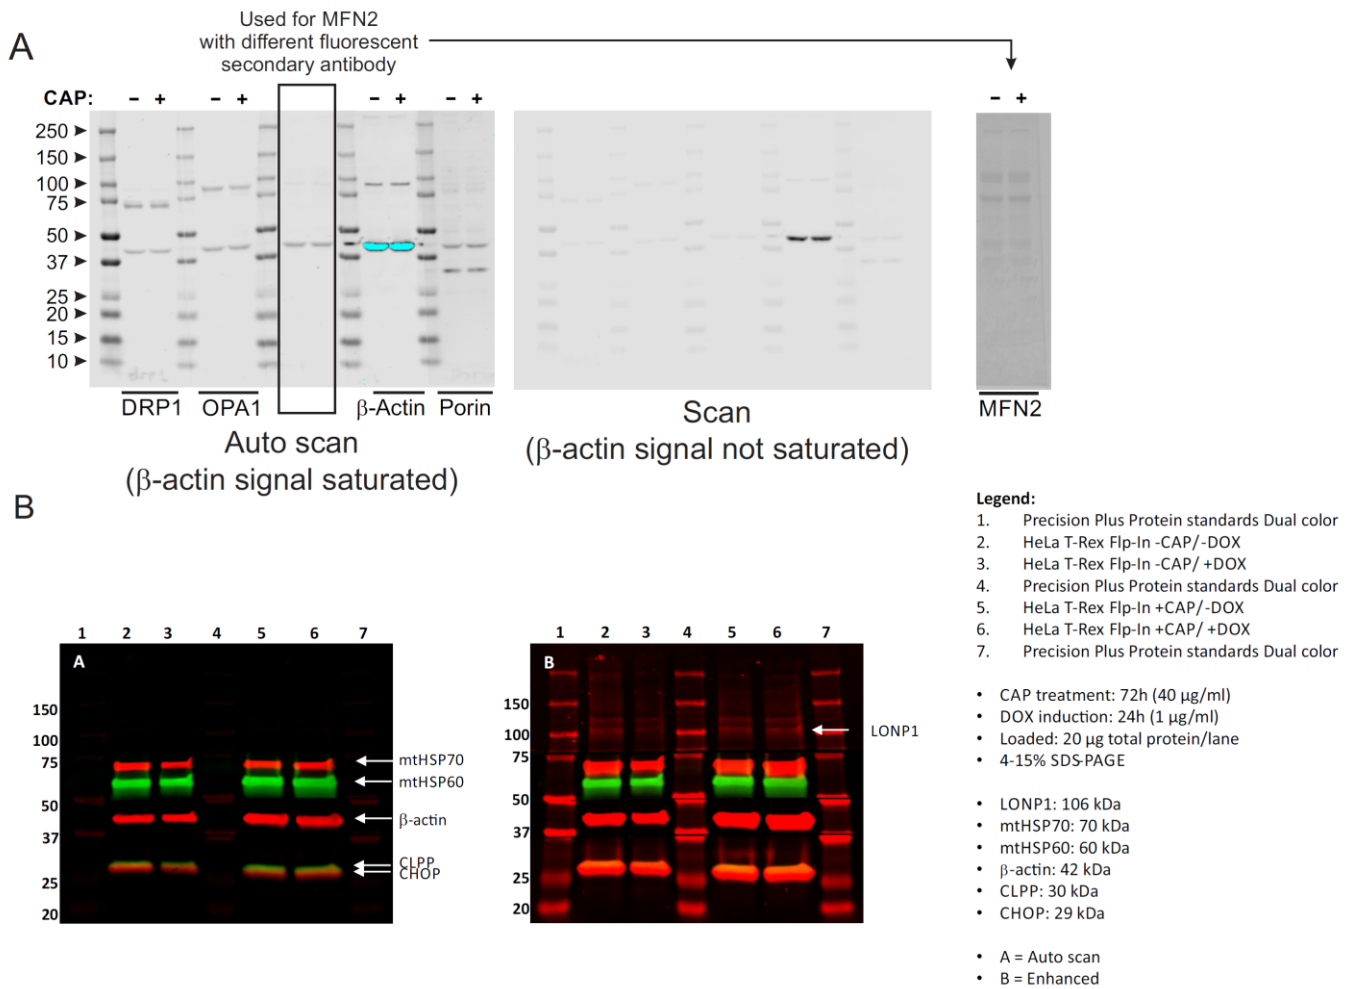

**Appendix Figure S5: Original blots for analysis of fission/fusion (panel A) and UPR<sup>mt</sup> proteins (panel B) in HeLa parental cells.**

## 4. Appendix Supplementary Tables

**Appendix Supplementary Table S1: Protein sequences, MW and dimensions of the AcGFP1 concatemers**

| Sequence                                                                                                                                                                                                                                                                                                                                                                                                                                                                                                                                                                                                                                                                                                                                                                                                                                                                                                                                                                                                                                                                                                                                                                                                                                                                                                                                                                                                                                                                                                                                          | MW and dimensions                                                                                                                                                                                                                                                                                                                                                                                                                                                                                                        |
|---------------------------------------------------------------------------------------------------------------------------------------------------------------------------------------------------------------------------------------------------------------------------------------------------------------------------------------------------------------------------------------------------------------------------------------------------------------------------------------------------------------------------------------------------------------------------------------------------------------------------------------------------------------------------------------------------------------------------------------------------------------------------------------------------------------------------------------------------------------------------------------------------------------------------------------------------------------------------------------------------------------------------------------------------------------------------------------------------------------------------------------------------------------------------------------------------------------------------------------------------------------------------------------------------------------------------------------------------------------------------------------------------------------------------------------------------------------------------------------------------------------------------------------------------|--------------------------------------------------------------------------------------------------------------------------------------------------------------------------------------------------------------------------------------------------------------------------------------------------------------------------------------------------------------------------------------------------------------------------------------------------------------------------------------------------------------------------|
| <p><b>Cox8-AcGFP1</b><br/> <b>MSVLTPLLLRGLTGSARRLPVPRAK</b>IHSLPPHPAFLYKVVDDPPV<b>MVSKGAELFTGIVPIL</b><br/>           ELNGDVNGHKFSVSGEGEGDATYGKLTLLKFICTTGKLPVPWPTLVTTLSYGVCFSRYPD<br/>           HMKQHDFFKSAMPEGYIQERTIFFEDDGNYSRAEVKFEEDTLVNRIELTGDFKEDGNI<br/>           LGNKMEYNYNAHNVYIMTDKAKNGIKVNFKIRHNIEDGSVQLADHYQONTPIGDGPVLL<br/>           PDNHYLSTQSALS KDPNEKRDMHYFGFVTA AAI THGMDEL YK</p>                                                                                                                                                                                                                                                                                                                                                                                                                                                                                                                                                                                                                                                                                                                                                                                                                                                                                                                                                                                                                                                                                                                                         | <p><b>MTS</b> = 2.703 kDa<br/> <b>Linker</b> = 2.241 kDa<br/> <b>AcGFP1</b> = 26.874 kDa<br/> <b>Total protein (+MTS)</b> = 31.818 kDa<br/> <b>Total protein (-MTS)</b> = 29.115 kDa</p>                                                                                                                                                                                                                                                                                                                                 |
| <p><b>Cox8-AcGFP1<sup>2</sup></b><br/> <b>MSVLTPLLLRGLTGSARRLPVPRAK</b>IHSLPPHPAFLYKVVDDPPV<b>MVSKGAELFTGIVPIL</b><br/>           ELNGDVNGHKFSVSGEGEGDATYGKLTLLKFICTTGKLPVPWPTLVTTLSYGVCFSRYPD<br/>           HMKQHDFFKSAMPEGYIQERTIFFEDDGNYSRAEVKFEEDTLVNRIELTGDFKEDGNI<br/>           LGNKMEYNYNAHNVYIMTDKAKNGIKVNFKIRHNIEDGSVQLADHYQONTPIGDGPVLL<br/>           PDNHYLSTQSALS KDPNEKRDMHYFGFVTA AAI THGMDEL YK<b>HPAFLYKVVDDPPV</b><b>M</b><br/>           VSKGAELFTGIVPILIELNGDVNGHKFSVSGEGEGDATYGKLTLLKFICTTGKLPVPWPTLV<br/>           TTLSYGVCFSRYPDHMKQHDFFKSAMPEGYIQERTIFFEDDGNYSRAEVKFEEDTLV<br/>           NRIELTGDFKEDGNI LGNKMEYNYNAHNVYIMTDKAKNGIKVNFKIRHNIEDGSVQLA<br/>           DHYQONTPIGDGPVLLPDNHYLSTQSALS KDPNEKRDMHYFGFVTA AAI THGMDEL YK</p>                                                                                                                                                                                                                                                                                                                                                                                                                                                                                                                                                                                                                                                                                                                                                                                | <p><b>MTS</b> = 2.703 kDa<br/> <b>Linker</b> = 2.241 kDa<br/> <b>AcGFP1</b> = 26.874 kDa<br/> <b>Linker</b> = 14AA = 50.4 Å = 1.597 kDa<br/> <b>AcGFP1</b> = 26.874 kDa<br/> <b>Total protein (+MTS)</b> = 60.289 kDa<br/> <b>Total protein (-MTS)</b> = 57.586 kDa</p>                                                                                                                                                                                                                                                  |
| <p><b>Cox8-AcGFP1<sup>3</sup></b><br/> <b>MSVLTPLLLRGLTGSARRLPVPRAK</b>IHSLPPHPAFLYKVVDDPPV<b>SIKLLAMVSKGAELFT</b><br/>           GIVPILIELNGDVNGHKFSVSGEGEGDATYGKLTLLKFICTTGKLPVPWPTLVTTLSYGVC<br/>           FSRYPDHMKQHDFFKSAMPEGYIQERTIFFEDDGNYSRAEVKFEEDTLVNRIELTGDF<br/>           KEDGNILGNKMEYNYNAHNVYIMTDKAKNGIKVNFKIRHNIEDGSVQLADHYQONTPIG<br/>           DGPVLLPDNHYLSTQSALS KDPNEKRDMHYFGFVTA AAI THGMDEL YK<b>DIPHPAFLYK</b><br/> <b>VVDDPPV</b><b>MVSKGAELFTGIVPIL</b>IELNGDVNGHKFSVSGEGEGDATYGKLTLLKFICTTGK<br/>           LPVPWPTLVTTLSYGVCFSRYPDHMKQHDFFKSAMPEGYIQERTIFFEDDGNYSRAEV<br/>           KFEGDTLVNRIELTGDFKEDGNI LGNKMEYNYNAHNVYIMTDKAKNGIKVNFKIRHNIE<br/>           DGSVQLADHYQONTPIGDGPVLLPDNHYLSTQSALS KDPNEKRDMHYFGFVTA AAI TH<br/>           GMDEL YK<b>HPAFLYKVVDDPPVSTCIPV</b><b>MVSKGAELFTGIVPIL</b>IELNGDVNGHKFSVSGE<br/>           GEGDATYGKLTLLKFICTTGKLPVPWPTLVTTLSYGVCFSRYPDHMKQHDFFKSAMPE<br/>           GYIQERTIFFEDDGNYSRAEVKFEEDTLVNRIELTGDFKEDGNI LGNKMEYNYNAHNVY<br/>           IMTDKAKNGIKVNFKIRHNIEDGSVQLADHYQONTPIGDGPVLLPDNHYLSTQSALS KDP<br/>           NEKRDMHYFGFVTA AAI THGMDEL YK</p>                                                                                                                                                                                                                                                                                                                                                                                                      | <p><b>MTS</b> = 2.703 kDa<br/> <b>Linker</b> = 2.867 kDa<br/> <b>AcGFP1</b> = 26.874 kDa<br/> <b>Linker</b> = 18AA = 64.8 Å = 2.019 kDa<br/> <b>AcGFP1</b> = 26.874 kDa<br/> <b>Linker</b> = 20AA = 72.0 Å = 2.197 kDa<br/> <b>AcGFP1</b> = 26.874 kDa<br/> <b>Total protein (+MTS)</b> = 90.408 kDa<br/> <b>Total protein (-MTS)</b> = 87.705 kDa</p>                                                                                                                                                                   |
| <p><b>Cox8<sup>2</sup>-AcGFP1<sup>4</sup></b><br/> <b>MSVLTPLLLRGLTGSARRLPVPRAK</b>IHSLGDP<b>MSVLTPLLLRGLTGSARRLPVPRAK</b>IHSL<br/> <b>PPGDLKPV</b><b>MVSKGAELFTGIVPIL</b>IELNGDVNGHKFSVSGEGEGDATYGKLTLLKFICTTG<br/>           KLPVPWPTLVTTLSYGVCFSRYPDHMKQHDFFKSAMPEGYIQERTIFFEDDGNYSRAE<br/>           VKFEGDTLVNRIELTGDFKEDGNI LGNKMEYNYNAHNVYIMTDKAKNGIKVNFKIRHN<br/>           IEDGSVQLADHYQONTPIGDGPVLLPDNHYLSTQSALS KDPNEKRDMHYFGFVTA AAI TH<br/>           GMDEL YK<b>HPAFLYKVVDDPPVSIKLLA</b><b>MVSKGAELFTGIVPIL</b>IELNGDVNGHKFSVSG<br/>           EGEGDATYGKLTLLKFICTTGKLPVPWPTLVTTLSYGVCFSRYPDHMKQHDFFKSAMPE<br/>           GYIQERTIFFEDDGNYSRAEVKFEEDTLVNRIELTGDFKEDGNI LGNKMEYNYNAHNV<br/>           YIMTDKAKNGIKVNFKIRHNIEDGSVQLADHYQONTPIGDGPVLLPDNHYLSTQSALS KDP<br/>           NEKRDMHYFGFVTA AAI THGMDEL YK<b>DIPHPAFLYKVVDDPPV</b><b>MVSKGAELFTGIVP</b><br/>           ILIELNGDVNGHKFSVSGEGEGDATYGKLTLLKFICTTGKLPVPWPTLVTTLSYGVCFSRY<br/>           PDHMKQHDFFKSAMPEGYIQERTIFFEDDGNYSRAEVKFEEDTLVNRIELTGDFKEDG<br/>           NILGNKMEYNYNAHNVYIMTDKAKNGIKVNFKIRHNIEDGSVQLADHYQONTPIGDGPV<br/>           LLPDNHYLSTQSALS KDPNEKRDMHYFGFVTA AAI THGMDEL YK<b>HPAFLYKVVDDPPV</b><br/> <b>STCIPV</b><b>MVSKGAELFTGIVPIL</b>IELNGDVNGHKFSVSGEGEGDATYGKLTLLKFICTTGKLP<br/>           VPWPTLVTTLSYGVCFSRYPDHMKQHDFFKSAMPEGYIQERTIFFEDDGNYSRAEVK<br/>           FEGDTLVNRIELTGDFKEDGNI LGNKMEYNYNAHNVYIMTDKAKNGIKVNFKIRHNIED<br/>           GSVQLADHYQONTPIGDGPVLLPDNHYLSTQSALS KDPNEKRDMHYFGFVTA AAI THG<br/>           MDEL YK</p> | <p><b>MTS</b> = 2.703 kDa<br/> <b>Linker</b> = 0.738 kDa<br/> <b>MTS</b> = 2.703 kDa<br/> <b>Linker</b> = 1.401 kDa<br/> <b>AcGFP1</b> = 26.874 kDa<br/> <b>Linker</b> = 20AA = 72.0 Å = 2.223 kDa<br/> <b>AcGFP1</b> = 26.874 kDa<br/> <b>Linker</b> = 18AA = 64.8 Å = 2.019 kDa<br/> <b>AcGFP1</b> = 26.874 kDa<br/> <b>Linker</b> = 20AA = 72.0 Å = 2.198 kDa<br/> <b>AcGFP1</b> = 26.874 kDa<br/> <b>Total protein (+MTS-linker-MTS)</b> = 121.481 kDa<br/> <b>Total protein (-MTS-linker-MTS)</b> = 115.337 kDa</p> |

**Remarks:** **Mitochondrial Target Sequence (MTS)**, the 25-residue Cox8 sequence (Rizzutto *et al.*, *J. Biol. Chem.*, 1989). **Linker sequences**, **Linker sequences**, **AcGFP1 sequence** (monomeric *Aequorea coerulescens* Green Fluorescent Protein). The linkers highlighted in black were not considered for geometry calculations of the proteins. Molecular weight was calculated directly from the protein sequence using the pI/Mw tool ([web.expasy.org/compute\\_pi](http://web.expasy.org/compute_pi)). One (1) Dalton (Da) equals 1 g/mol.

**Appendix Supplementary Table S2: Experimental  $D_{\text{solvent}}$  values in aqueous solution and in the cell**

| Protein/molecule                                                                                                                                                           | MW (kDa) | LOG10 (MW) | $D_{\text{solvent}}$ ( $\mu\text{m}^2/\text{s}$ ) | LOG10 ( $D_{\text{solvent}}$ ) | Reference                         |
|----------------------------------------------------------------------------------------------------------------------------------------------------------------------------|----------|------------|---------------------------------------------------|--------------------------------|-----------------------------------|
| <b>GLOBULAR OR SPHERICAL CONFORMATION IN AQUEOUS SOLUTION</b>                                                                                                              |          |            |                                                   |                                |                                   |
| Fitting results of LOG(MW) vs. LOG( $D_{\text{solvent}}$ ): $Y=A+B \cdot X$ ; $R=-0.986$ ; $p<0.0001$ ; $A=2.45 \pm 0.0154(\text{SE})$ ; $B=-0.360 \pm 0.00525(\text{SE})$ |          |            |                                                   |                                |                                   |
| Insulin                                                                                                                                                                    | 12       | 1.079      | 147.0                                             | 2.167                          | Gribbon <i>et al.</i> , 1998      |
| Cytochrome- <i>c</i>                                                                                                                                                       | 13       | 1.126      | 114.0                                             | 2.057                          | Young <i>et al.</i> , 1980        |
| Ribonuclease                                                                                                                                                               | 13       | 1.102      | 131.0                                             | 2.117                          | Tyn & Gusek, 1990                 |
| Alpha-lactalbumin                                                                                                                                                          | 13       | 1.124      | 106.0                                             | 2.025                          | Tyn & Gusek, 1990                 |
| Ribonuclease                                                                                                                                                               | 14       | 1.137      | 117.0                                             | 2.068                          | Tyn & Gusek, 1990                 |
| Lysozyme                                                                                                                                                                   | 14       | 1.144      | 112.0                                             | 2.049                          | Tyn & Gusek, 1990                 |
| Myoglobin                                                                                                                                                                  | 16       | 1.204      | 113.0                                             | 2.053                          | Tyn & Gusek, 1990                 |
| Ribonuclease                                                                                                                                                               | 17       | 1.230      | 102.0                                             | 2.009                          | Tyn & Gusek, 1990                 |
| Myokinase                                                                                                                                                                  | 21       | 1.322      | 160.0                                             | 2.204                          | Arrio-Dupont <i>et al.</i> , 2000 |
| Alpha-chymotrypsin (monomer)                                                                                                                                               | 21       | 1.328      | 102.0                                             | 2.009                          | Young <i>et al.</i> , 1980        |
| Alpha-chymotrypsinogen                                                                                                                                                     | 38       | 1.580      | 79.0                                              | 1.898                          | He & Niemeyer, 2003               |
| Gamma-chymotrypsin                                                                                                                                                         | 23       | 1.366      | 95.0                                              | 1.978                          | Tyn & Gusek, 1990                 |
| Chymotrypsin A                                                                                                                                                             | 18       | 1.243      | 102.0                                             | 2.009                          | Tyn & Gusek, 1990                 |
| SBTI                                                                                                                                                                       | 22       | 1.334      | 88.0                                              | 1.944                          | Gribbon <i>et al.</i> , 1998      |
| Ribosome 4S                                                                                                                                                                | 23       | 1.365      | 75.8                                              | 1.880                          | Tyn & Gusek, 1990                 |
| Beta-casein                                                                                                                                                                | 24       | 1.382      | 60.5                                              | 1.782                          | Tyn & Gusek, 1990                 |
| Riboflavin-binding protein                                                                                                                                                 | 33       | 1.512      | 74.0                                              | 1.869                          | Tyn & Gusek, 1990                 |
| Pepsin                                                                                                                                                                     | 33       | 1.515      | 87.0                                              | 1.940                          | Tyn & Gusek, 1990                 |
| Beta-lactoglobulin                                                                                                                                                         | 35       | 1.549      | 78.0                                              | 1.892                          | Tyn & Gusek, 1990                 |
| Ovalbumin                                                                                                                                                                  | 44       | 1.643      | 77.6                                              | 1.890                          | Tyn & Gusek, 1990                 |
| Phosphoglucomutase                                                                                                                                                         | 60       | 1.778      | 63.8                                              | 1.805                          | Arrio-Dupont <i>et al.</i> , 2000 |
| Phosphoglycerate kinase                                                                                                                                                    | 47       | 1.670      | 63.8                                              | 1.805                          | Tyn & Gusek, 1990                 |
| Hemoglobin                                                                                                                                                                 | 63       | 1.799      | 69.0                                              | 1.839                          | Tyn & Gusek, 1990                 |
| Hemoglobin - earthworm                                                                                                                                                     | 3700     | 3.568      | 12.0                                              | 1.079                          | Papadopoulos <i>et al.</i> , 2000 |
| Bovine serum albumin                                                                                                                                                       | 65       | 1.816      | 61.5                                              | 1.789                          | Tyn & Gusek, 1990                 |
| Beta-enolase                                                                                                                                                               | 90       | 1.954      | 56.0                                              | 1.748                          | Arrio-Dupont <i>et al.</i> , 2000 |
| Alpha-amylase                                                                                                                                                              | 97       | 1.986      | 57.2                                              | 1.757                          | Young <i>et al.</i> , 1980        |
| Citrate synthase                                                                                                                                                           | 98       | 1.991      | 58.0                                              | 1.763                          | Durchslag & Zipper, 1997          |
| Hexokinase                                                                                                                                                                 | 99       | 1.996      | 60.0                                              | 1.778                          | Tyn & Gusek, 1990                 |
| Glyceraldehyde-3-phosphate dehydrogenase                                                                                                                                   | 141      | 2.149      | 50.0                                              | 1.699                          | Tyn & Gusek, 1990                 |

|                              |     |       |      |       |                                                  |
|------------------------------|-----|-------|------|-------|--------------------------------------------------|
| Lysine-trna ligase           | 138 | 2.140 | 43.0 | 1.633 | <a href="#">Tyn &amp; Gusek, 1990</a>            |
| Lactate dehydrogenase        | 138 | 2.141 | 51.0 | 1.708 | <a href="#">Tyn &amp; Gusek, 1990</a>            |
| Phosphofructokinase          | 142 | 2.152 | 53.0 | 1.724 | <a href="#">Tyn &amp; Gusek, 1990</a>            |
| Phosphofructokinase          | 160 | 2.204 | 42.0 | 1.623 | <a href="#">Tyn &amp; Gusek, 1990</a>            |
| IgG                          | 160 | 2.204 | 40.5 | 1.607 | <a href="#">Arrio-Dupont <i>et al.</i>, 2000</a> |
| Phosphofructokinase          | 320 | 2.505 | 32.2 | 1.508 | <a href="#">Tyn &amp; Gusek, 1990</a>            |
| Beta-lactoglobulin A         | 147 | 2.167 | 42.0 | 1.623 | <a href="#">Tyn &amp; Gusek, 1990</a>            |
| Gamma-globulin               | 153 | 2.185 | 40.0 | 1.602 | <a href="#">Tyn &amp; Gusek, 1990</a>            |
| Gamma-globulin               | 162 | 2.210 | 37.0 | 1.568 | <a href="#">Tyn &amp; Gusek, 1990</a>            |
| Glycogen-phosphorylase       | 163 | 2.212 | 42.0 | 1.623 | <a href="#">Tyn &amp; Gusek, 1990</a>            |
| Glycogen-phosphorylase       | 185 | 2.267 | 41.2 | 1.615 | <a href="#">Tyn &amp; Gusek, 1990</a>            |
| Malate synthase              | 170 | 2.230 | 45.0 | 1.653 | <a href="#">Tyn &amp; Gusek, 1990</a>            |
| Malate synthase              | 187 | 2.272 | 45.0 | 1.653 | <a href="#">Tyn &amp; Gusek, 1990</a>            |
| Methionyl-tRNA synthetase    | 173 | 2.238 | 35.0 | 1.544 | <a href="#">Tyn &amp; Gusek, 1990</a>            |
| Pyruvate kinase              | 191 | 2.281 | 42.0 | 1.623 | <a href="#">Tyn &amp; Gusek, 1990</a>            |
| Catalase                     | 225 | 2.352 | 41.0 | 1.613 | <a href="#">Tyn &amp; Gusek, 1990</a>            |
| Catalase                     | 232 | 2.365 | 41.0 | 1.613 | <a href="#">Tyn &amp; Gusek, 1990</a>            |
| Catalase                     | 248 | 2.394 | 43.0 | 1.633 | <a href="#">Papadopoulos <i>et al.</i>, 2000</a> |
| Catalase                     | 250 | 2.398 | 45.0 | 1.653 | <a href="#">Tyn &amp; Gusek, 1990</a>            |
| Porphobilinogen synthase     | 270 | 2.431 | 42.0 | 1.623 | <a href="#">Tyn &amp; Gusek, 1990</a>            |
| Porphobilinogen synthase     | 240 | 2.380 | 42.0 | 1.623 | <a href="#">Tyn &amp; Gusek, 1990</a>            |
| Glutamate dehydrogenase      | 270 | 2.431 | 35.0 | 1.544 | <a href="#">Tyn &amp; Gusek, 1990</a>            |
| Glutamate dehydrogenase      | 312 | 2.494 | 35.0 | 1.544 | <a href="#">Tyn &amp; Gusek, 1990</a>            |
| Glutamate dehydrogenase      | 343 | 2.535 | 35.0 | 1.544 | <a href="#">Tyn &amp; Gusek, 1990</a>            |
| Edestin                      | 310 | 2.491 | 39.3 | 1.594 | <a href="#">Tyn &amp; Gusek, 1990</a>            |
| Edestin                      | 324 | 2.511 | 31.7 | 1.501 | <a href="#">Tyn &amp; Gusek, 1990</a>            |
| Adenovirus Type 2 hexon      | 323 | 2.509 | 35.6 | 1.551 | <a href="#">Tyn &amp; Gusek, 1990</a>            |
| Adenovirus Type 2 hexon      | 355 | 2.550 | 33.2 | 1.521 | <a href="#">Tyn &amp; Gusek, 1990</a>            |
| Phosphofructokinase          | 330 | 2.519 | 36.0 | 1.556 | <a href="#">Tyn &amp; Gusek, 1990</a>            |
| Phosphofructokinase          | 340 | 2.531 | 32.2 | 1.508 | <a href="#">Tyn &amp; Gusek, 1990</a>            |
| DNA-dependent RNA+polymerase | 360 | 2.556 | 33.0 | 1.519 | <a href="#">Tyn &amp; Gusek, 1990</a>            |
| Glycogen phosphorylase       | 370 | 2.568 | 33.0 | 1.519 | <a href="#">Tyn &amp; Gusek, 1990</a>            |
| Cytochrome c1                | 371 | 2.569 | 33.1 | 1.520 | <a href="#">Young <i>et al.</i>, 1980</a>        |
| Ferritin                     | 450 | 2.653 | 38.0 | 1.580 | <a href="#">Papadopoulos <i>et al.</i>, 2000</a> |
| Apo ferritin                 | 441 | 2.644 | 36.1 | 1.558 | <a href="#">Tyn &amp; Gusek, 1990</a>            |
| Apo ferritin                 | 460 | 2.663 | 36.1 | 1.558 | <a href="#">Tyn &amp; Gusek, 1990</a>            |

|                                    |      |       |      |       |                                                  |
|------------------------------------|------|-------|------|-------|--------------------------------------------------|
| Apo ferritin                       | 467  | 2.669 | 36.1 | 1.558 | <a href="#">Tyn &amp; Gusek, 1990</a>            |
| Fibronectin                        | 510  | 2.708 | 22.7 | 1.356 | <a href="#">Durchslag &amp; Zipper, 1997</a>     |
| Beta-galactosidase                 | 540  | 2.732 | 30.0 | 1.477 | <a href="#">Arrio-Dupont <i>et al.</i>, 2000</a> |
| Thyroglobulin                      | 630  | 2.799 | 26.5 | 1.423 | <a href="#">Tyn &amp; Gusek, 1990</a>            |
| Thyroglobulin                      | 650  | 2.813 | 26.5 | 1.423 | <a href="#">Tyn &amp; Gusek, 1990</a>            |
| Thyroglobulin                      | 660  | 2.820 | 26.1 | 1.417 | <a href="#">Tyn &amp; Gusek, 1990</a>            |
| Ribosome S30                       | 700  | 2.845 | 29.5 | 1.470 | <a href="#">Tyn &amp; Gusek, 1990</a>            |
| Alpha-crystallin                   | 770  | 2.886 | 23.0 | 1.362 | <a href="#">Tyn &amp; Gusek, 1990</a>            |
| Alpha-crystallin                   | 840  | 2.924 | 23.0 | 1.362 | <a href="#">Tyn &amp; Gusek, 1990</a>            |
| Alpha-crystallin                   | 960  | 2.982 | 20.0 | 1.301 | <a href="#">Tyn &amp; Gusek, 1990</a>            |
| Alpha2-macroglobulin               | 820  | 2.914 | 24.1 | 1.382 | <a href="#">Tyn &amp; Gusek, 1990</a>            |
| Alpha2-macroglobulin               | 985  | 2.993 | 24.1 | 1.382 | <a href="#">Tyn &amp; Gusek, 1990</a>            |
| Haemocyanin                        | 854  | 2.931 | 26.9 | 1.430 | <a href="#">Tyn &amp; Gusek, 1990</a>            |
| Ribosome S30                       | 870  | 2.940 | 29.5 | 1.470 | <a href="#">Tyn &amp; Gusek, 1990</a>            |
| Ribosome S30                       | 900  | 2.954 | 29.5 | 1.470 | <a href="#">Tyn &amp; Gusek, 1990</a>            |
| Beta-casein                        | 1200 | 3.079 | 14.0 | 1.146 | <a href="#">Tyn &amp; Gusek, 1990</a>            |
| Ribosome S30                       | 1000 | 3.000 | 29.5 | 1.470 | <a href="#">Tyn &amp; Gusek, 1990</a>            |
| Ribosome S50                       | 1500 | 3.176 | 19.1 | 1.281 | <a href="#">Tyn &amp; Gusek, 1990</a>            |
| Ribosome S50                       | 1550 | 3.190 | 19.1 | 1.281 | <a href="#">Tyn &amp; Gusek, 1990</a>            |
| Ribosome S50                       | 1580 | 3.199 | 19.1 | 1.281 | <a href="#">Tyn &amp; Gusek, 1990</a>            |
| Ribosome S50                       | 1800 | 3.255 | 19.1 | 1.281 | <a href="#">Tyn &amp; Gusek, 1990</a>            |
| Ribosome S70                       | 3000 | 3.477 | 18.3 | 1.262 | <a href="#">Tyn &amp; Gusek, 1990</a>            |
| Fatty-acid synthase                | 2200 | 3.342 | 17.8 | 1.250 | <a href="#">Tyn &amp; Gusek, 1990</a>            |
| Fatty-acid synthase                | 2300 | 3.362 | 17.0 | 1.230 | <a href="#">Tyn &amp; Gusek, 1990</a>            |
| Pyruvate dehydrogenase             | 3780 | 3.577 | 12.0 | 1.079 | <a href="#">Tyn &amp; Gusek, 1990</a>            |
| Pyruvate dehydrogenase             | 4800 | 3.681 | 12.0 | 1.079 | <a href="#">Tyn &amp; Gusek, 1990</a>            |
| Satellite tobacco necrosis virus   | 9000 | 3.954 | 10.7 | 1.029 | <a href="#">Tyn &amp; Gusek, 1990</a>            |
| Satellite tobacco necrosis virus   | 1700 | 3.230 | 20.4 | 1.310 | <a href="#">Tyn &amp; Gusek, 1990</a>            |
| Turnip yellow mosaic virus         | 1970 | 3.294 | 20.4 | 1.310 | <a href="#">Tyn &amp; Gusek, 1990</a>            |
| Turnip yellow mosaic virus         | 3013 | 3.479 | 15.1 | 1.179 | <a href="#">Tyn &amp; Gusek, 1990</a>            |
| Turnip yellow mosaic virus         | 3100 | 3.491 | 15.1 | 1.179 | <a href="#">Tyn &amp; Gusek, 1990</a>            |
| Alfalfa mosaic virus (top)         | 3500 | 3.544 | 15.1 | 1.179 | <a href="#">Tyn &amp; Gusek, 1990</a>            |
| Bacteriophage MS2 (native protein) | 3770 | 3.576 | 15.5 | 1.190 | <a href="#">Tyn &amp; Gusek, 1990</a>            |
| Bacteriophage fr                   | 3600 | 3.556 | 16.0 | 1.204 | <a href="#">Durchslag &amp; Zipper, 1997</a>     |
| Bacteriophage virus R17            | 3620 | 3.559 | 14.0 | 1.146 | <a href="#">Tyn &amp; Gusek, 1990</a>            |
| Bacteriophage virus R17            | 3600 | 3.556 | 13.3 | 1.123 | <a href="#">Tyn &amp; Gusek, 1990</a>            |

|                                                                                                                                         |       |       |      |       |                          |
|-----------------------------------------------------------------------------------------------------------------------------------------|-------|-------|------|-------|--------------------------|
| Bacteriophage virus R17                                                                                                                 | 3700  | 3.568 | 13.3 | 1.123 | Tyn & Gusek, 1990        |
| Wild cucumber mosaic virus top a                                                                                                        | 4190  | 3.622 | 13.3 | 1.123 | Tyn & Gusek, 1990        |
| Wild cucumber mosaic virus top b                                                                                                        | 4000  | 3.602 | 12.9 | 1.111 | Tyn & Gusek, 1990        |
| Wild cucumber mosaic virus top b                                                                                                        | 4300  | 3.633 | 12.9 | 1.111 | Tyn & Gusek, 1990        |
| Bromegrass mosaic virus                                                                                                                 | 4400  | 3.643 | 12.9 | 1.111 | Tyn & Gusek, 1990        |
| Bromegrass mosaic virus                                                                                                                 | 4400  | 3.643 | 15.5 | 1.190 | Tyn & Gusek, 1990        |
| Bromegrass mosaic virus                                                                                                                 | 4700  | 3.672 | 15.5 | 1.190 | Tyn & Gusek, 1990        |
| Broad bean mottle virus                                                                                                                 | 5400  | 3.732 | 15.5 | 1.190 | Tyn & Gusek, 1990        |
| Broad bean mottle virus                                                                                                                 | 4750  | 3.677 | 14.4 | 1.158 | Tyn & Gusek, 1990        |
| Broad bean mottle virus                                                                                                                 | 4850  | 3.686 | 14.4 | 1.158 | Tyn & Gusek, 1990        |
| Broad bean mottle virus                                                                                                                 | 5000  | 3.699 | 14.4 | 1.158 | Tyn & Gusek, 1990        |
| Broad bean mottle virus                                                                                                                 | 5200  | 3.716 | 13.8 | 1.140 | Tyn & Gusek, 1990        |
| Turnip yellow mosaic virus                                                                                                              | 5600  | 3.748 | 14.4 | 1.158 | Tyn & Gusek, 1990        |
| Turnip yellow mosaic virus                                                                                                              | 4970  | 3.696 | 15.5 | 1.190 | Tyn & Gusek, 1990        |
| Turnip yellow mosaic virus                                                                                                              | 5000  | 3.699 | 15.5 | 1.190 | Tyn & Gusek, 1990        |
| Tobacco necrosis virus                                                                                                                  | 5530  | 3.743 | 15.5 | 1.190 | Tyn & Gusek, 1990        |
| Tobacco necrosis virus                                                                                                                  | 6000  | 3.778 | 15.3 | 1.185 | Tyn & Gusek, 1990        |
| Southern bean mosaic virus                                                                                                              | 7400  | 3.869 | 14.0 | 1.146 | Tyn & Gusek, 1990        |
| Southern bean mosaic virus                                                                                                              | 6600  | 3.820 | 13.9 | 1.143 | Tyn & Gusek, 1990        |
| Southern bean mosaic virus                                                                                                              | 6602  | 3.820 | 13.9 | 1.143 | Tyn & Gusek, 1990        |
| Southern bean mosaic virus                                                                                                              | 6630  | 3.822 | 13.4 | 1.127 | Durchslag & Zipper, 1997 |
| Alfalfa mosaic virus (bottom)                                                                                                           | 6690  | 3.825 | 13.9 | 1.143 | Tyn & Gusek, 1990        |
| Alfalfa mosaic virus (bottom)                                                                                                           | 6820  | 3.834 | 11.3 | 1.053 | Tyn & Gusek, 1990        |
| Alfalfa mosaic virus (bottom)                                                                                                           | 6860  | 3.836 | 11.3 | 1.053 | Tyn & Gusek, 1990        |
| Alfalfa mosaic virus (bottom)                                                                                                           | 6920  | 3.840 | 10.5 | 1.021 | Tyn & Gusek, 1990        |
| Tobacco bushy stunt virus                                                                                                               | 7400  | 3.869 | 10.5 | 1.021 | Tyn & Gusek, 1990        |
| Bacteriophage lambda (enlarged prehead)                                                                                                 | 10700 | 4.029 | 11.5 | 1.061 | Tyn & Gusek, 1990        |
| Bacteriophage lambda (processed prehead)                                                                                                | 17000 | 4.230 | 6.9  | 0.839 | Tyn & Gusek, 1990        |
| Bacteriophage lambda (empty head)                                                                                                       | 18000 | 4.255 | 7.8  | 0.892 | Tyn & Gusek, 1990        |
| Bacteriophage lambda (unprocessed head)                                                                                                 | 21000 | 4.322 | 6.4  | 0.806 | Tyn & Gusek, 1990        |
| Bacteriophage lambda (full head)                                                                                                        | 22000 | 4.342 | 7.6  | 0.881 | Tyn & Gusek, 1990        |
| Lipid-containing bacteriophage                                                                                                          | 56000 | 4.748 | 6.5  | 0.813 | Tyn & Gusek, 1990        |
| Rice dwarf virus                                                                                                                        | 45000 | 4.653 | 5.5  | 0.740 | Durchslag & Zipper, 1997 |
| <b>ELONGATED, FIBROUS STRUCTURE OR ROD-LIKE CONFORMATION IN AQUEOUS SOLUTION</b>                                                        |       |       |      |       |                          |
| Fitting results of LOG(MW) vs. LOG(D <sub>solvent</sub> ): $Y=A+B \cdot X$ ; R=-0.990; p<0.0001; A=3.06±0.0542(SE); B=-0.715±0.0173(SE) |       |       |      |       |                          |



|                             |        |       |       |        |                                   |
|-----------------------------|--------|-------|-------|--------|-----------------------------------|
| Flagellin                   | 42     | 1.620 | 54.0  | 1.732  | Tyn & Gusek, 1990                 |
| Meromyosin                  | 120    | 2.079 | 22.5  | 1.352  | Tyn & Gusek, 1990                 |
| Fibrinogen                  | 340    | 2.531 | 20.2  | 1.305  | Tyn & Gusek, 1990                 |
| Myosin                      | 493    | 2.693 | 11.6  | 1.064  | Tyn & Gusek, 1990                 |
| Myosin                      | 570    | 2.756 | 10.0  | 1.000  | Tyn & Gusek, 1990                 |
| Myosin                      | 594    | 2.774 | 8.7   | 0.940  | Tyn & Gusek, 1990                 |
| RNA of tobacco mosaic virus | 2150   | 3.332 | 7.0   | 0.843  | Tyn & Gusek, 1990                 |
| DNA                         | 4000   | 3.602 | 1.3   | 0.114  | Tyn & Gusek, 1990                 |
| DNA                         | 5000   | 3.699 | 1.3   | 0.114  | Tyn & Gusek, 1990                 |
| DNA                         | 6000   | 3.778 | 1.3   | 0.114  | Tyn & Gusek, 1990                 |
| p1868                       | 1232   | 3.091 | 7.0   | 0.845  | Prazeres, 2008                    |
| PLN1                        | 1386   | 3.142 | 6.0   | 0.778  | Prazeres, 2008                    |
| Not available               | 1525   | 3.183 | 5.6   | 0.748  | Prazeres, 2008                    |
| PK3A108                     | 1535   | 3.186 | 5.4   | 0.728  | Prazeres, 2008                    |
| pUC18                       | 1773   | 3.249 | 5.4   | 0.732  | Prazeres, 2008                    |
| pUC8                        | 1793   | 3.254 | 4.9   | 0.690  | Prazeres, 2008                    |
| pUC18-3A108                 | 1847   | 3.266 | 4.8   | 0.681  | Prazeres, 2008                    |
| pGem1a                      | 2462   | 3.391 | 4.1   | 0.614  | Prazeres, 2008                    |
| pBR322                      | 2880   | 3.459 | 3.7   | 0.568  | Prazeres, 2008                    |
| p30delta                    | 3136   | 3.496 | 3.5   | 0.545  | Prazeres, 2008                    |
| pACL29                      | 3564   | 3.552 | 3.1   | 0.491  | Prazeres, 2008                    |
| ColE1                       | 4290   | 3.632 | 2.9   | 0.461  | Prazeres, 2008                    |
| pDR1996                     | 6732   | 3.828 | 2.3   | 0.362  | Prazeres, 2008                    |
| pPIC9K<TRL5>                | 7326   | 3.865 | 1.7   | 0.217  | Prazeres, 2008                    |
| pCC1FOS™45                  | 29700  | 4.473 | 0.6   | -0.222 | Prazeres, 2008                    |
| CTD-2342K16                 | 74448  | 4.872 | 0.5   | -0.310 | Prazeres, 2008                    |
| CTD-2609C22                 | 121110 | 5.083 | 0.3   | -0.481 | Prazeres, 2008                    |
| CTD-2657L24                 | 189486 | 5.278 | 0.2   | -0.638 | Prazeres, 2008                    |
| EGFP1                       | 30     | 1.477 | 104.0 | 2.017  | Pack <i>et al.</i> , 2006         |
| EGFP1                       | 27     | 1.431 | 87.0  | 1.940  | Arrio-Dupont <i>et al.</i> , 2000 |
| EGFP2                       | 60     | 1.778 | 71.8  | 1.856  | Pack <i>et al.</i> , 2006         |
| EGFP3                       | 90     | 1.954 | 61.3  | 1.787  | Pack <i>et al.</i> , 2006         |
| EGFP4                       | 120    | 2.079 | 48.7  | 1.688  | Pack <i>et al.</i> , 2006         |
| EGFP5                       | 150    | 2.176 | 45.2  | 1.655  | Pack <i>et al.</i> , 2006         |
| EGFP1                       | 27     | 1.430 | 97.3  | 1.988  | Vámosi <i>et al.</i> , 2016       |
| EGFP2                       | 54     | 1.735 | 98.8  | 1.995  | Vámosi <i>et al.</i> , 2016       |

|                                                                                                                                          |     |       |      |       |                             |
|------------------------------------------------------------------------------------------------------------------------------------------|-----|-------|------|-------|-----------------------------|
| EGFP3                                                                                                                                    | 82  | 1.912 | 60.2 | 1.780 | Vámosi <i>et al.</i> , 2016 |
| EGFP4                                                                                                                                    | 109 | 2.038 | 54.8 | 1.739 | Vámosi <i>et al.</i> , 2016 |
| <b>ELONGATED, FIBROUS STRUCTURE OR ROD-LIKE MOLECULES IN THE NUCLEUS OF HeLa CELLS</b>                                                   |     |       |      |       |                             |
| Fitting results of LOG(MW) vs. LOG(D <sub>solvent</sub> ): $Y=A+B \cdot X$ ; R=-0.926; P=3.42E-4; A=2.72±0.214(SE); B=-0.748±0.115(SE)   |     |       |      |       |                             |
| EGFP1 - nucleus HeLa                                                                                                                     | 30  | 1.477 | 32.3 | 1.510 | Pack <i>et al.</i> , 2006   |
| EGFP2 - nucleus HeLa                                                                                                                     | 60  | 1.778 | 21.2 | 1.327 | Pack <i>et al.</i> , 2006   |
| EGFP3 - nucleus HeLa                                                                                                                     | 90  | 1.954 | 16.5 | 1.218 | Pack <i>et al.</i> , 2006   |
| EGFP4 - nucleus HeLa                                                                                                                     | 120 | 2.079 | 12.3 | 1.088 | Pack <i>et al.</i> , 2006   |
| EGFP5 - nucleus HeLa                                                                                                                     | 150 | 2.176 | 11.1 | 1.046 | Pack <i>et al.</i> , 2006   |
| EGFP1 - nucleus HEK293, HeLa, TP366, T98G                                                                                                | 27  | 1.431 | 50.6 | 1.704 | Dross <i>et al.</i> , 2009  |
| EGFP2 - nucleus HEK293, HeLa, TP366, T98G                                                                                                | 54  | 1.732 | 31.0 | 1.491 | Dross <i>et al.</i> , 2009  |
| EGFP3 - nucleus HEK293, HeLa, TP366, T98G                                                                                                | 81  | 1.908 | 23.8 | 1.377 | Dross <i>et al.</i> , 2009  |
| EGFP4 - nucleus HEK293, HeLa, TP366, T98G                                                                                                | 108 | 2.033 | 20.2 | 1.305 | Dross <i>et al.</i> , 2009  |
| <b>ELONGATED, FIBROUS STRUCTURE OR ROD-LIKE MOLECULES IN THE CYTOSOL OF HeLa CELLS</b>                                                   |     |       |      |       |                             |
| Fitting results of LOG(MW) vs. LOG(D <sub>solvent</sub> ): $Y=A+B \cdot X$ ; R=-0.984; P=0.00236; A=2.53±0.131(SE); B=-0.665±0.0688(SE)  |     |       |      |       |                             |
| EGFP1 - cytosol HeLa                                                                                                                     | 30  | 1.477 | 33.3 | 1.523 | Pack <i>et al.</i> , 2006   |
| EGFP2 - cytosol HeLa                                                                                                                     | 60  | 1.778 | 23.4 | 1.369 | Pack <i>et al.</i> , 2006   |
| EGFP3 - cytosol HeLa                                                                                                                     | 90  | 1.954 | 18.7 | 1.271 | Pack <i>et al.</i> , 2006   |
| EGFP4 - cytosol HeLa                                                                                                                     | 120 | 2.079 | 12.8 | 1.108 | Pack <i>et al.</i> , 2006   |
| EGFP5 - cytosol HeLa                                                                                                                     | 150 | 2.176 | 11.8 | 1.073 | Pack <i>et al.</i> , 2006   |
| <b>AcGFP1 CONCATEMERS IN THE MITOCHONDRIA OF HeLa CELLS</b>                                                                              |     |       |      |       |                             |
| Fitting results of LOG(MW) vs. LOG(D <sub>solvent</sub> ): $Y=A+B \cdot X$ ; R=-0.997; P=0.00268; A=2.81±0.0923(SE); B=-0.976±0.0506(SE) |     |       |      |       |                             |
| AcGFP1                                                                                                                                   | 29  | 1.465 | 23.9 | 1.378 | Current study               |
| AcGFP1 <sup>2</sup>                                                                                                                      | 58  | 1.760 | 11.8 | 1.072 | Current study               |
| AcGFP1 <sup>3</sup>                                                                                                                      | 88  | 1.943 | 8.6  | 0.934 | Current study               |
| AcGFP1 <sup>4</sup>                                                                                                                      | 115 | 2.062 | 6.0  | 0.780 | Current study               |

**Remarks:** Data in red of Pack *et al.*, 2006 were corrected as proposed by Dross *et al.*, 2009 using a diffusion constant for Rhodamine 6G of 430 μm<sup>2</sup>/s (Jameson *et al.*, 2009). Data for the Tobacco mosaic virus was not included since this virus is geometrically extreme (*i.e.* it resembles a cylinder with a length/diameter ratio of 16.7; Saxton, 2014).

**Appendix Supplementary Table S3: Interpretation of the data sets in Appendix Supplementary Table S2**

| Dataset                                                                          | Environment             | Techniques | Interpretation                   | References                                                                                                                                                                                                                                                                                                                                                           |
|----------------------------------------------------------------------------------|-------------------------|------------|----------------------------------|----------------------------------------------------------------------------------------------------------------------------------------------------------------------------------------------------------------------------------------------------------------------------------------------------------------------------------------------------------------------|
| <b>Globular or spherical conformation in aqueous solution</b>                    |                         |            |                                  |                                                                                                                                                                                                                                                                                                                                                                      |
| Globular                                                                         | Aqueous solution        | Various    | Globular structure               | <a href="#">Young <i>et al.</i>, 1980</a><br><a href="#">Tyn &amp; Gusek, 1990</a><br><a href="#">Durchslag &amp; Zipper, 1997</a><br><a href="#">Gribbon <i>et al.</i>, 1998</a><br><a href="#">Arrio-Dupont <i>et al.</i>, 2000</a><br><a href="#">Papadopoulos <i>et al.</i>, 2000</a><br><a href="#">He &amp; Niemeyer, 2003</a><br><a href="#">Saxton, 2014</a> |
| Virus                                                                            | Aqueous solution        | Various    | Globular structure               | <a href="#">Tyn &amp; Gusek, 1990</a><br><a href="#">Durchslag &amp; Zipper, 1997</a><br><a href="#">Saxton, 2014</a>                                                                                                                                                                                                                                                |
| <b>Elongated, fibrous structure or rod-like conformation in aqueous solution</b> |                         |            |                                  |                                                                                                                                                                                                                                                                                                                                                                      |
| Fibrous                                                                          | Aqueous solution        | Various    | Fibrous, elongated structure     | <a href="#">Tyn &amp; Gusek, 1990</a><br><a href="#">Saxton, 2014</a>                                                                                                                                                                                                                                                                                                |
| Plasmids                                                                         | Aqueous solution        | Various    | Supercoiled, elongated structure | <a href="#">Prazeres, 2008</a>                                                                                                                                                                                                                                                                                                                                       |
| (E)GFP concatemers                                                               | Aqueous solution        | FCS        | Rod-like molecules               | <a href="#">Pack <i>et al.</i>, 2006</a><br><a href="#">Vámosi <i>et al.</i>, 2016</a>                                                                                                                                                                                                                                                                               |
| <b>Elongated, fibrous structure or rod-like molecules in the cell</b>            |                         |            |                                  |                                                                                                                                                                                                                                                                                                                                                                      |
| EGFP concatemers                                                                 | Nucleus of HeLa cells   | FCS        | Rod-like molecules               | <a href="#">Pack <i>et al.</i>, 2006</a>                                                                                                                                                                                                                                                                                                                             |
| EGFP concatemers                                                                 | Cytoplasm of HeLa cells | FCS        | Rod-like molecules               | <a href="#">Pack <i>et al.</i>, 2006</a>                                                                                                                                                                                                                                                                                                                             |
| EGFP concatemers                                                                 | Nucleus of HeLa cells   | FCS        | Rod-like molecules               | <a href="#">Dross <i>et al.</i>, 2009</a>                                                                                                                                                                                                                                                                                                                            |

## **5. Appendix Supplementary References**

1. **Ajaz S**, Czajka A, Malik A (2015) Accurate measurement of circulating mitochondrial DNA content from human blood samples using real-time quantitative PCR. *Meth Mol Biol* 1264: 117-131
2. **Akabayov B**, Akabayov SR, Lee SJ, Wagner G, Richardson CC (2013) Impact of macromolecular crowding on DNA replication. *Nat Commun* 4: 1615
3. **Appelhans T**, Richter CP, Wilkens V, Hess ST, Piehler J, Busch KB (2011) Nanoscale organisation of mitochondrial microcompartments revealed by combining tracking and localization microscopy. *Nano Lett* 12: 610-616
4. **Arrio-Dupont M**, Cribier S, Foucault G, Devaux PF, d'Albis A, (1996) Diffusion of fluorescently labeled macromolecules in cultured muscle cells. *Biophys J* 70: 2327-2332
5. **Arrio-Dupont M**, Foucault G, Vacher M, Devaux PF, Cribier S (2000) Translational diffusion of globular proteins in the cytoplasm of cultured muscle cells. *Biophys J* 78: 901-907
6. **Bell P**, Vandenberghe LH, Wu D, Johnston J, Limberis M, Wilson JM (2007) A comparative analysis of novel fluorescent proteins as reporters for gene transfer studies. *J Histochem Cytochem* 55: 931-939
7. **Blässle A**, Soh G, Braun T, Mörsdorf D, Preiss H, Jordan BM, Müller P (2018) Quantitative diffusion measurements using the open-source software PyFRAP. *Nat Commun* 9: 1582
8. **Burbulla LF**, Fitzgerald JC, Stegen K, Westermeier J, Thost AK, Kato H, Mokranjac D, Sauerwald J, Martins LM, Voitalla D, *et al.* (2014) Mitochondrial proteolytic stress induced by loss of mortalin function is rescued by Parkin and PINK1. *Cell Death Dis* 5: e1180
9. **Bulina ME**, Chudakov DM, Britanova OV, Yanushevich YG, Staroverov DB, Chepurnykh TV, Merzlyak EM, Shkrob MA, Lukyanov S, Lukyanov KA (2006) A genetically encoded photosensitizer. *Nat Biotechnol* 24: 95-99
10. **Bustin SA**, Benes V, Garson JA, Hellemans J, Huggett J, Kubista M, Mueller R, Nolan T, Pfaffl MW, Shipley GL, Vandesompele J, Wittwer CT (2009) The MIQE guidelines: minimum information for publication of quantitative real-time PCR experiments. *Clin Chem* 55: 611-622.
11. **Dashevskaya S**, Kopito RB, Friedman R, Elbaum M, Epel BL (2008) Diffusion of anionic and neutral GFP derivatives through plasmodesmata in epidermal cells of *Nicotiana benthamiana*. *Protoplasma* 234: 13-23.
12. **Dieteren CEJ**, Willems PHGM, Vogel RO, Swarts HG, Franssen J, Roepman R, Crienen G, Smeitink JAM, Nijtmans LGJ, Koopman WJH (2008) Subunits of Mitochondrial Complex I Exist as part of matrix- and membrane-associated subcomplexes in living cells. *J Biol Chem* 283: 34753-34761
13. **Dieteren CEJ**, Gielen SCAM, Nijtmans LGJ, Smeitink JAM, Swarts HG, Brock R, Willems PHGM, Koopman WJH (2011) Solute diffusion is hindered in the mitochondrial matrix. *Proc Natl Acad Sci USA* 108: 8657-8662
14. **Divakaruni AS**, Jastroch M (2022) A practical guide for the analysis, standardization and interpretation of oxygen consumption measurements. *Nat Metab* 4:978-994
15. **Dross N**, Spriet C, Zwerger M, Müller G, Waldeck W, Langowski J (2009) Mapping eGFP oligomer mobility in living cell nuclei. *PLoS ONE* 4: e5041
16. **Durchslag H**, Zipper P (1997) Prediction of hydrodynamic parameters of biopolymers from small-angle scattering data. *J Appl Cryst* 30: 1112-1124
17. **Einstein A** (1905) Über die von der molekularkinetischen Theorie der Wärme geforderte Bewegung von in ruhenden Flüssigkeiten suspendierten Teilchen. *Annalen der Physik* 322: 549-560
18. **Elachouri G**, Vidoni S, Zanna C, Pattyn A, Boukhaddaoui H, Gaget K, Yu-Wai-Man P, Gasparre G, Sarzi E, Delettre C, *et al.* (2011) OPA1 links human mitochondrial genome maintenance to mtDNA replication and distribution. *Genome Res* 21: 12-20
19. **Erbán R** (2014) From molecular dynamics to Brownian dynamics. *Proc R Soc A* 470: 20140036
20. **Goodwin JS**, Kenworthy AK (2005) Photobleaching approaches to investigate diffusional mobility and trafficking of Ras in living cells. *Methods* 37: 154-164
21. **Gribbon P**, Hardingham TE (1998) Macromolecular diffusion of biological polymers measured by confocal fluorescence recovery after photobleaching. *Biophys J* 75: 1032-1039

22. **He L**, Niemeyer B (2003) A novel correlation for protein diffusion coefficients based on molecular weight and radius of gyration. *Biotechnol Prog* 19: 544-548
23. **Houtkooper RH**, Mouchiroud L, Ryu D, Moullan N, Katsyuba E, Knott G, Williams RW, Auwerx J (2013) Mitonuclear protein imbalance as a conserved longevity mechanism. *Nature* 497: 451-459
24. **Huber GA, McCammon JA** (2019) Brownian dynamics simulations of biological molecules. *Trends Chem* 1: 727-738
25. **Hu C**, Shu L, Huang X, Yu J, Li L, Gong L, Yang M, Wu Z, Gao Z, Zhao Y, Chen L, Song Z (2020) OPA1 and MICOS regulate mitochondrial crista dynamics and formation. *Cell Death Dis* 11: 940
26. **Jameson DM**, Ross JA, Albanesi JP (2009) Fluorescence fluctuation microscopy: ushering a new age of enlightenment for cellular dynamics. *Biophys Rev* 1: 105-118
27. **Koopman WJH**, Visch HJ, Smeitink JAM, Willems PHGM (2006) Simultaneous, quantitative measurement and automated analysis of mitochondrial morphology, mass, potential and motility in living human skin fibroblasts, *Cytometry A* 69A: 1-12
28. **Koopman WJH**, Distelmaier F, Hink MA, Verkaart S, Wijers M, Fransen J, Smeitink JAM, Willems PHGM (2008a) Inherited complex I deficiency is associated with faster protein diffusion in the matrix of moving mitochondria. *Am J Physiol Cell Physiol* 294: C1124-C1132
29. **Koopman WJH**, Distelmaier F, Esseling JJ, Smeitink JAM, Willems PHGM (2008b) Computer-assisted live cell analysis of mitochondrial membrane potential, morphology and calcium handling. *Methods* 46: 304-311
30. **Lavalette D**, Hink MA, Tourbez M, Tétreau C, Visser AJ (2006) Proteins as microviscosimeters: Brownian motion revisited. *Eur Biophys J* 35: 517-522
31. **Levenberg K** (1944) A method for the solution of certain non-linear problems in least squares. *Quarterly Appl Math* 2: 164-168.
32. **Lorén N**, Hagman J, Jonasson JK, Deschout H, Bernin D, Cella-Zanacchi F, Diaspro A, McNally JG, Ameloot M, Smisdom N, (2015) Fluorescence recovery after photobleaching in material and life sciences: putting theory into practice. *Q Rev Biophys* 48: 323-387
33. **Malik AN**, Shahni R, Rodriguez-de-Ledesma A, Laftah A, Cunningham P (2011) Mitochondrial DNA as a non-invasive biomarker: accurate quantification using real time quantitative PCR without co-amplification of pseudogenes and dilution bias. *Bioch Biophys Res Comm* 412 :1-7
34. **Marquardt DW** (1963) An algorithm for the least-squares estimation of nonlinear parameters. *SIAM J Appl Math.* 11: 431-441.
35. **Minier F**, Sigel E (2004) Techniques: Use of concatenated subunits for the study of ligand-gated ion channels. *Trends Pharmacol Sci* 25: 499-503
36. **Monkos K** (2004) On the hydrodynamics and temperature dependence of the solution conformation of human serum albumin from viscometry approach. *Biochim Biophys Acta* 1700: 27-34
37. **Minton AP** (1981) Excluded volume as a determinant of macromolecular structure and reactivity. *Biopolymers* 20: 2093-2120
38. **Moullan N**, Mouchiroud L, Wang X, Ryu D, Williams EG, Mottis A, Jovaisaite V, Frochoux MV, Quiros PM, Deplancke B, *et al.* (2015) Tetracyclines disturb mitochondrial function across eukaryotic models: a call for caution in biomedical research. *Cell Rep* 10: 1681-1691
39. **Nooteboom M**, Forkink M, Willems PHGM, Koopman WJH (2012) Live-cell quantification of mitochondrial functional parameters. Chapter 6 in: *Neuromethods* 70: Visualization techniques, from immunohistochemistry to Magnetic Resonance Imaging (Badoer, E., ed.)
40. **Nicholls TJ**, Gustafsson CM (2018) Separating and segregating the human mitochondrial genome. *Trends Biochem Sci* 43: 869-881
41. **Ölveczky BP**, Verkman AS (1998) Monte Carlo analysis of obstructed diffusion in three dimensions: application to molecular diffusion in organelles. *Biophys J* 74: 2722-2730
42. **Pack C**, Saito K, Tamura M, Kinjo M (2006) Microenvironment and effect of energy depletion in the nucleus analyzed by mobility of multiple oligomeric EGFPs. *Biophys J* 91: 3921-3936



43. **Palmer AE**, Jin C, Reed JC, Tsien RY (2004) Bcl-2-mediated alterations in endoplasmic reticulum  $\text{Ca}^{2+}$  analyzed with an improved genetically encoded fluorescent sensor. *Proc Natl Acad Sci USA* 101: 17404-17409
44. **Papadopoulos S**, Jürgens KD, Gros G (2000) Protein diffusion in living skeletal muscle fibers: Dependence on protein size, fiber type, and contraction. *Biophys J* 79: 2084-2094
45. **Partikian A**, Olveczky B, Swaminathan R, Li Y, Verkman AS (1998) Rapid diffusion of green fluorescent protein in the mitochondrial matrix. *J Cell Biol* 140: 821-829
46. **Perrin, F.** (1936) Mouvement Brownien d'un ellipsoïde (II). Rotation libre et dépolariation des fluorescences. Translation et diffusion de molécules ellipsoïdales. *J Phys Radium* 7: 1-11
47. **Prazeres DMF** (2008) Prediction of diffusion coefficients of plasmids. *Biotechnol Bioeng* 99:1040-1044
48. **Richter U**, Ng KY, Suomi F, Marttinen P, Turunen T, Jackson C, Suomalainen A, Vihinen H, Jokitalo E, Nyman TA, *et al.* (2019) Mitochondrial stress response triggered by defects in protein synthesis quality control. *Life Sci Alliance* 2: e201800219
49. **Rizzutto F**, Nakase H, Darras B, Francke U, Fabrizi GM, Mengel T, Walsh F, Kadenbach B, DiMauro S, Schon EA (1989) A gene specifying subunit VIII of human cytochrome-*c* oxidase is localized to chromosome 11 and is expressed in both muscle and non-muscle tissues. *J Biol Chem* 264: 10595–10600
50. **Saxton MJ** (2014) Wanted: Scalable tracers for diffusion measurements. *Phys Chem B* 118: 12805-12817
51. **Segawa M**, Wolf DM, Hultgren NW, Williams DS, van der Blik AM, Schackelford DB, Liesa M, Shirihaï OS. (2020) Quantification of cristae architecture reveals time-dependent characteristics of individual mitochondria. *Life Sci Alliance* 3: e201900620
52. **Shpilka T**, Haynes CM (2018) The mitochondrial UPR: mechanisms, physiological functions and implications in ageing. *Nat Rev Mol Cell Biol* 19: 109-120
53. **Sutherland W** (1905) A dynamical theory of diffusion for non-electrolytes and the molecular mass of albumin. *Philosophical Magazine* 9: 781–785
54. **Terry BR**, Matthews EK, Haseloff J. (1995) Molecular characterisation of recombinant green fluorescent protein by fluorescence correlation microscopy. *Biochem Biophys Res Commun* 217: 21-27
55. **Thubron EB**, Rosa HS, Hodges A, Sivaprasad S, Francis PT, Pienaar IS, Malik AN (2019) Regional mitochondrial DNA and cell-type changes in post-mortem brains of non-diabetic Alzheimer's disease are not present in diabetic Alzheimer's disease. *Sci Rep* 9: 11386
56. **Tyn MT**, Gusek TD (1990) Prediction of diffusion coefficients of proteins. *Biotechnol Bioeng* 35: 327-338
57. **Van Helvoort JMLM**, Kool J, Woldringh CL (1996) Chloramphenicol causes fusion of separated nucleoids in *Escherichia coli* K-12 cells and filaments. *J Bacteriol* 178: 4289-4293
58. **Vámosi G**, Mücke N, Müller G, Krieger JW, Curth U, Langowski J, Tóth K (2014) EGFP oligomers as natural fluorescence and hydrodynamic standards. *Sci Rep* 6: 33022
59. **Von Smoluchowski M** (1906) Zur kinetischen Theorie der Brownschen Molekularbewegung und der Suspensionen. *Annalen der Physik* 326: 756–780
60. **Weissert V**, Rieger B, Morris S, Arroum T, Psathaki OE, Zobel T, Perkins G, Busch KB (2021) Inhibition of the mitochondrial ATPase function by IF1 changes the spatiotemporal organisation of ATP synthase. *Biochim Biophys Acta Bioenerg* 1862: 148322
61. **Wilkins V**, Kohl W, Busch K (2012) Restricted diffusion of OXPHOS complexes in dynamic mitochondrial delays their exchange between cristae and engenders a transitory mosaic distribution. *J Cell Sci* 126: 103-116
62. **Willems PHGM**, Swarts HG, Hink MA, Koopman WJH (2009) Chapter 16: The use of fluorescence correlation spectroscopy to probe mitochondrial mobility and intramatrix protein diffusion. *Methods Enzymol* 456: 287-302

63. **Wolf DM**, Segawa M, Kondadi AK, Anand R, Bailey ST, Reichert AS, van der Blik AM, Schackelford DB, Liesa M, Shirihai O (2019) Individual cristae within the same mitochondrion display different membrane potentials and are functionally independent. *EMBO J* 38: e101056
64. **Xu M**, Bi X, He X, Yu X, Zhao M, Zhang W (2016) Inhibition of the mitochondrial unfolded protein response by acetylcholine alleviated hypoxia/reoxygenation-induced apoptosis of endothelial cells. *Cell Cycle* 15: 1331-1343
65. **Yang F**, Moss LG, Philips Jr, GN (1996) The molecular structure of green fluorescent protein. *Nature Biotechnol* 14: 1246-1251
66. **Young ME**, Carrood PA, Bell RL (1980) Estimation of diffusion coefficients of proteins. *Biotechnol Bioeng* 22: 947-955
67. **Zhao Q**, Wang J, Levichkin IV, Stasinopoulos S, Ryan MT, Hoogenraad NJ (2002) A mitochondrial specific stress response in mammalian cells. *EMBO J* 21: 4411-4419
