# Supplementary material for: Stress‐dependent macromolecular crowding in the mitochondrial matrix
Source: PubMed Central journal article supplement — EMBO J. 2023 Feb 24;42(7):e108533. doi: 10.15252/embj.2021108533 (PMC10068333; doi:10.15252/embj.2021108533), 2023-02-24
Supplement: EMBJ-42-e108533-s002.pdf [file EMBJ-42-e108533-s002.pdf]

## Expanded View Figures

**Figure EV1. Compact and extended structural conformations of AcGFP1 concatemers.**

- A Dimensions (numerals) of AcGFP1 in Angstrom ( $\text{\AA}$ ) based upon GFP crystal structure. R and L indicate the radius and length of the protein, respectively. Geometric data are summarized in Table 1.
- B Same as panel (A) but now for AcGFP1<sup>2</sup> displaying a minimal structural conformation ("compact").
- C Same as panel (A) but now for AcGFP1<sup>2</sup> displaying a structural conformation of maximal size ("extended").
- D Same as panel (A) but now for AcGFP1<sup>3</sup> displaying a compact structure.
- E Same as panel (A) but now for AcGFP1<sup>3</sup> displaying an extended structure.
- F Same as panel (A) but now for AcGFP1<sup>4</sup> displaying a compact structure.
- G Same as panel (A) but now for AcGFP1<sup>4</sup> displaying an extended structure.

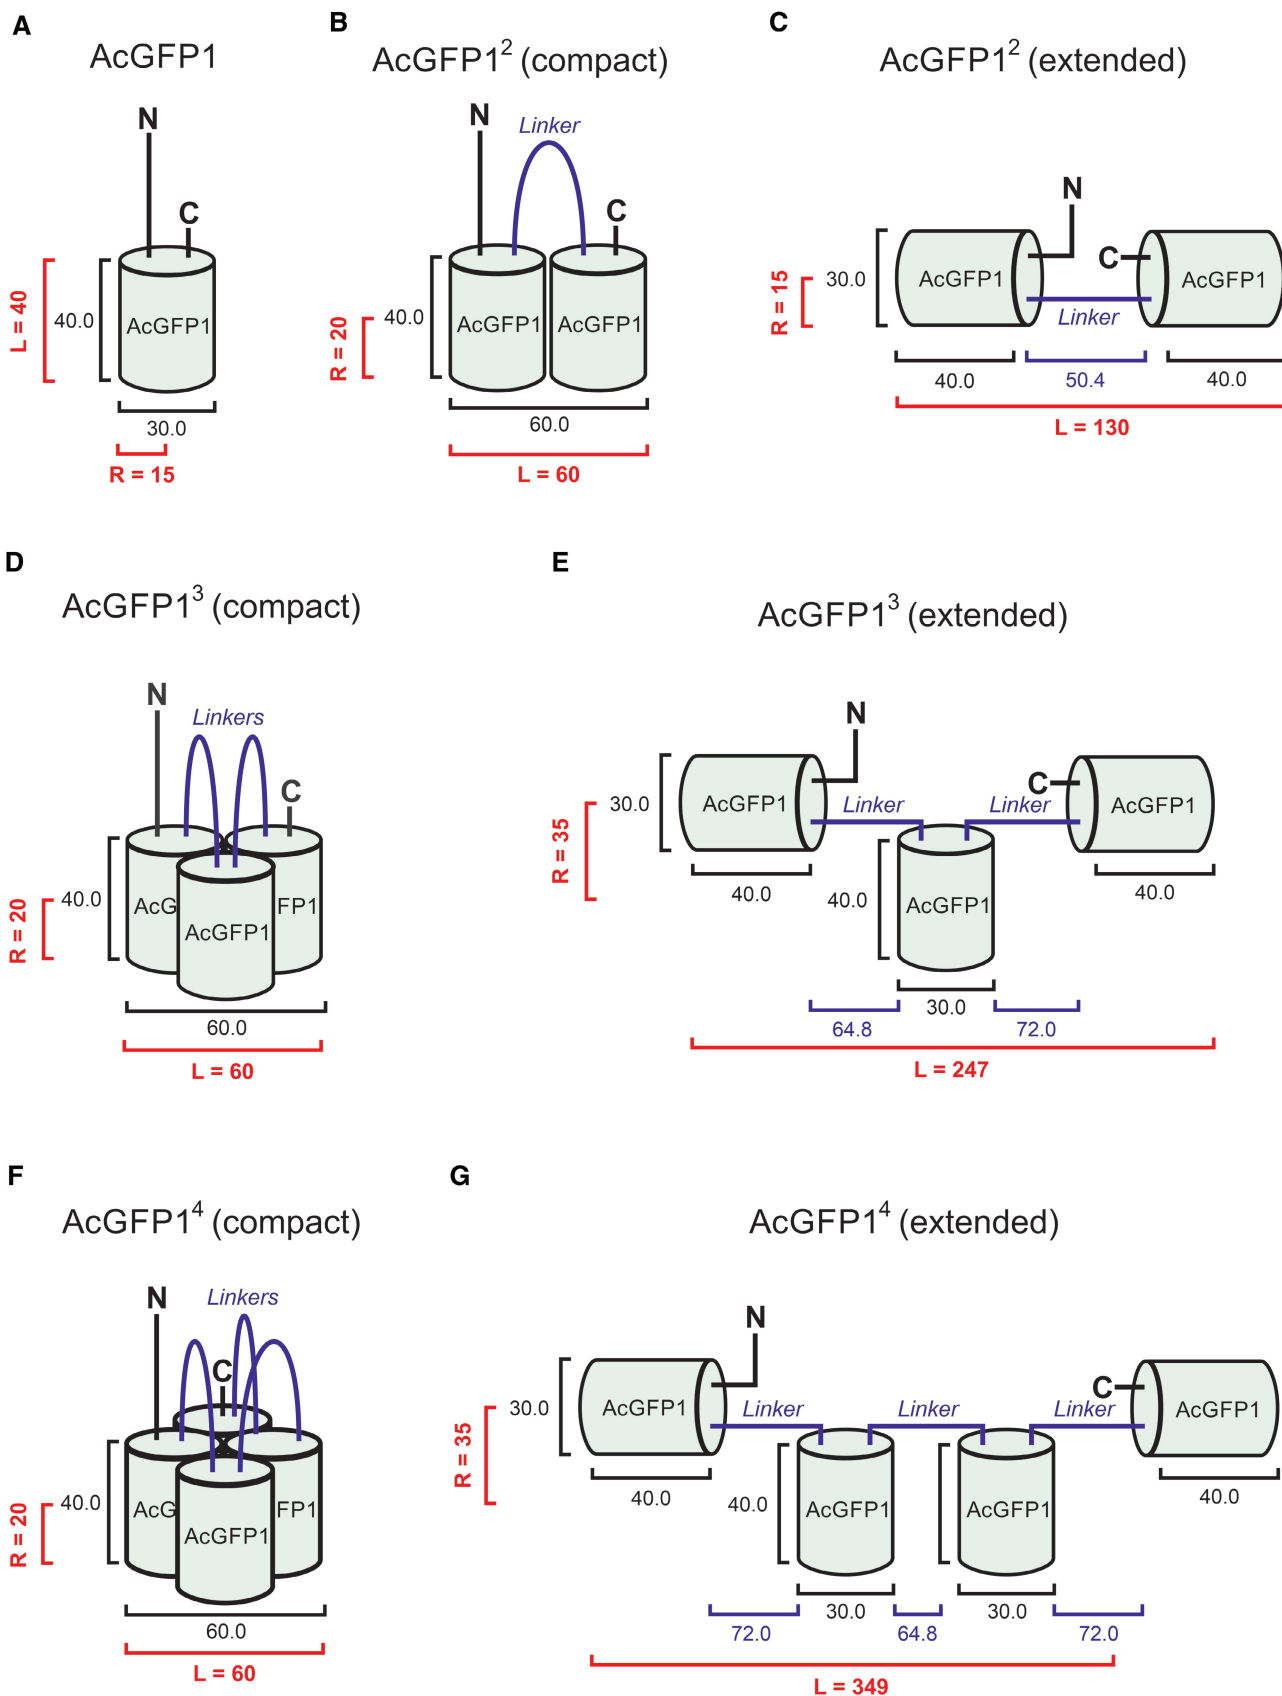

Figure EV1.

**Figure EV2. Functional consequences of chloramphenicol (CAP) treatment in HeLa parental cells.**

- A Average oxygen consumption rate (OCR) in untreated cells, and cells treated with DOX, CAP, or DOX + CAP (for legend see panel B). Oligomycin (OLI), mitochondrial uncoupler (FCCP), and antimycin A + rotenone (AA/ROT) were added at the indicated time points.
- B Same as panel (A) but now for the average extracellular acidification rate (ECAR).
- C Statistical analysis of the data in panel (A and B) with respect to the basal OCR, maximal OCR and basal ECAR.
- D Effect of CAP on the TMRM fluorescence signal in mitochondria and nucleus. Left panel: Typical example of fluorescence microscopy image of TMRM-stained cells. Fluorescence signals were manually determined in two regions of interest (yellow) defined in a mitochondria-dense ("m") and nucleoplasmic part ("n") of the cell and corrected for background using a close by ROI outside of the cell ("b"). Data panels: numerical values for the mitochondrial fluorescence signal (mito), nuclear fluorescence signal (nucleus) and fluorescence ratio value (mito/nucleus).
- E Effect of DOX, CAP or DOX + CAP on the cellular protein levels of LONP1 (specific bands marked by red boxes), mtHSP70, mtHSP60, CLPP and CHOP.  $\beta$ -actin was used as cellular loading control. Arrowheads indicate molecular weight in kDa. Individual panels were contrast-optimized for visualization purposes. Original blots are presented in Appendix Fig S5B.
- F Effect of CAP on mitochondrial DNA (mtDNA) levels expressed as number of mtDNA copies per cell and per nanogram (ng) of total DNA.
- G Effect of CAP on the cellular levels of key mitochondrial fission and fusion proteins (specific bands are marked by red boxes): DRP1 (Dynamamin-related protein 1, OPA1 (Optic atrophy protein 1), MFN2 (Mitofusin 2).  $\beta$ -actin and VDACC1 were used as cellular and mitochondrial loading controls, respectively. Arrowheads indicate molecular weight in kDa. Individual panels were contrast-optimized for visualization purposes. Original blots are presented in Appendix Fig S5A.

Data information: OCR and ECAR data (panels A–C) was obtained in a single ( $N = 1$ ) experiment and the following number ( $n$ ) of technical replicates: Untreated ( $n = 5$ ), +DOX ( $n = 5$ ), +CAP ( $n = 4$ ), +DOX+CAP ( $n = 6$ ). TMRM data (Panel D) was obtained in  $N = 2$  independent experiments for  $n = 991$  cells (–CAP) and  $n = 668$  cells (+CAP). MtDNA data (panel F) was obtained in  $N = 2$  independent experiments in  $n = 7$  assays (–CAP) and  $n = 6$  assays (+CAP). Each symbol represents an individual well (panel C), cell (panel D) or assay (panel F). In panels (A and B), individual data points reflect mean  $\pm$  SEM. In panel (C), bars and errors reflect mean  $\pm$  SEM. In panels (D and F), error bars mark the 95% (upper) and 5% (lower) percentile, the boundary boxes mark the 75% (upper) and 25% (lower) percentile, the square marks the mean value of the data, and the horizontal line within the box indicates the median value of the data. Significant differences, obtained using an independent Student's *t*-test, are indicated by \* $P < 0.05$ , \*\* $P < 0.01$ , \*\*\* $P < 0.001$  between the marked conditions (a–c) in panel (C) and between the –CAP and +CAP condition (panel D and F). Not significant is marked by n.s. The exact *P*-values for panel (C) (basal OCR) were: Untreated (a) vs. +DOX (b):  $P = 0.0126$ ; Untreated (a) vs. +CAP (c):  $P = 1.554 \cdot 10^{-6}$ ; Untreated (a) vs. +DOX+CAP:  $P = 4.082 \cdot 10^{-8}$ ; +DOX (b) vs. +CAP (c):  $P = 2.671 \cdot 10^{-7}$ ; +DOX (b) vs. +DOX + CAP:  $P = 3.806 \cdot 10^{-9}$ . The exact *P*-values for panel (C) (maximal OCR) were: Untreated (a) vs. +DOX (b):  $P = 6.509 \cdot 10^{-4}$ ; Untreated (a) vs. +CAP (c):  $P = 2.019 \cdot 10^{-7}$ ; Untreated (a) vs. +DOX+CAP:  $P = 4.900 \cdot 10^{-9}$ ; +DOX (b) vs. +CAP (c):  $P = 4.558 \cdot 10^{-8}$ ; +DOX (b) vs. +DOX + CAP:  $P = 5.713 \cdot 10^{-10}$ . The exact *P*-values for panel (C) (basal ECAR) were: Untreated (a) vs. +DOX (b):  $P = 0.0023$ ; Untreated (a) vs. +CAP (c):  $P = 4.571 \cdot 10^{-8}$ ; Untreated (a) vs. +DOX+CAP:  $P = 7.784 \cdot 10^{-10}$ ; +DOX (b) vs. +CAP (c):  $P = 2.412 \cdot 10^{-8}$ ; +DOX (b) vs. +DOX+CAP:  $P = 7.039 \cdot 10^{-10}$ . The exact *P*-value for panel (C) (mito) was:  $P = 7.145 \cdot 10^{-6}$ . The exact *P*-value for panel (C) (nucleus) was:  $P = 0.0237$ . The exact *P*-value for panel (C) (mito/nucleus) was:  $P = 5.702 \cdot 10^{-5}$ . The exact *P*-value for panel (F) (per cell) was:  $P = 0.556$ . The exact *P*-value for panel (F) (per ng total DNA) was:  $P = 0.139$ .

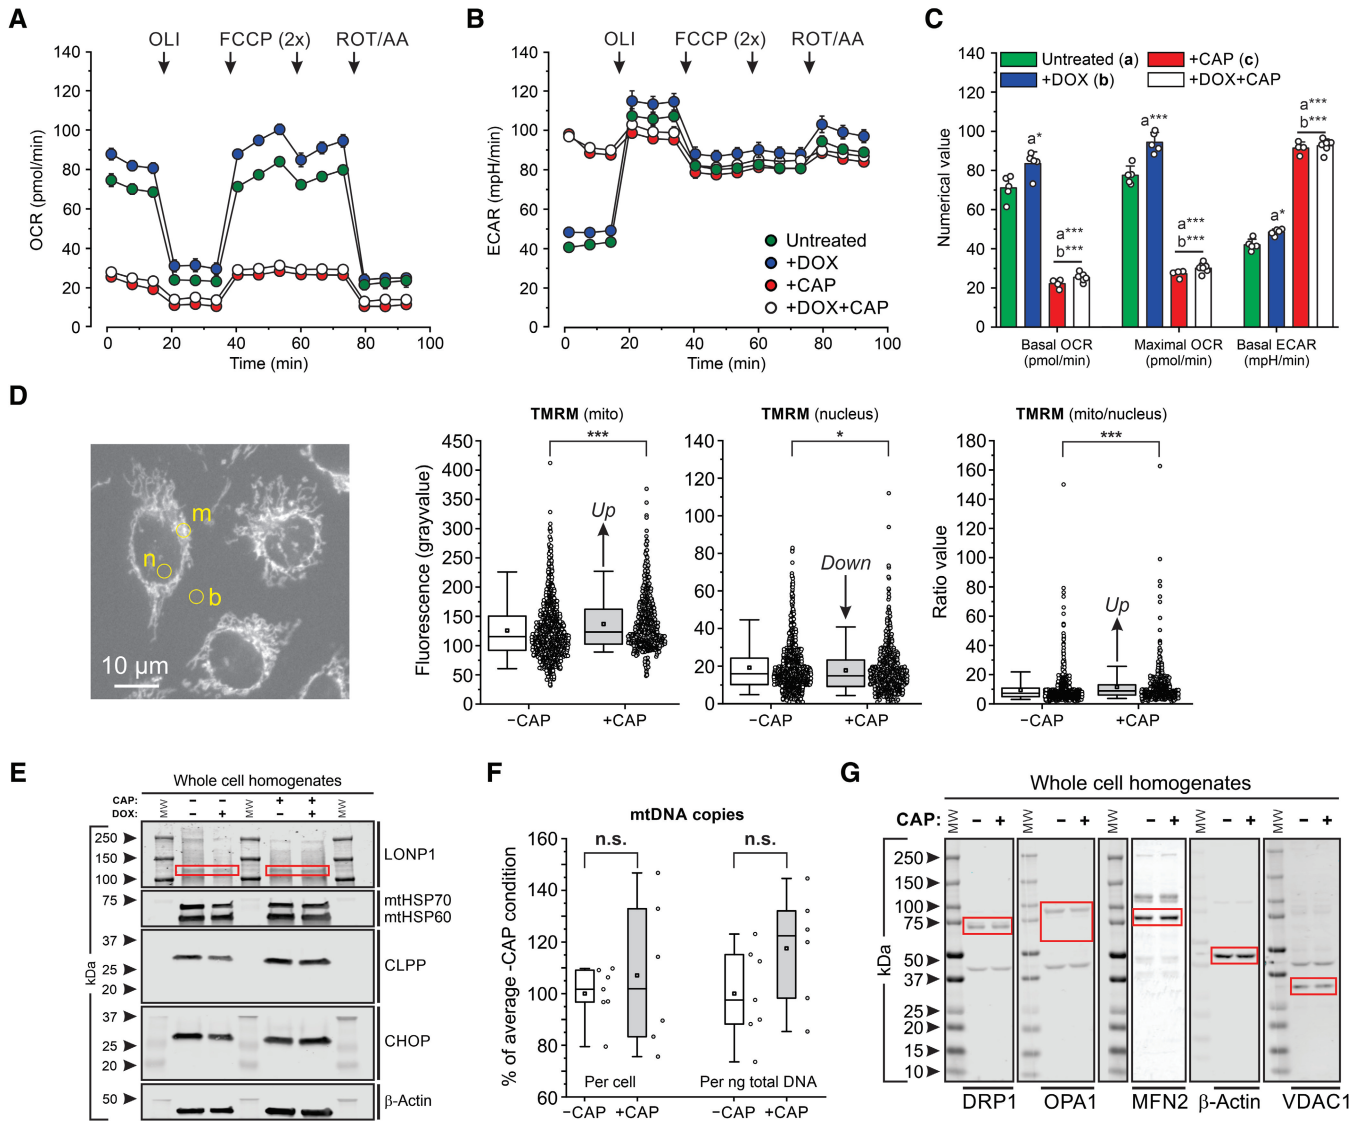

Figure EV2.

**Figure EV3. Chloramphenicol (CAP) and doxycycline (DOX) do not increase protein markers typically associated with induction of the mitochondrial unfolded protein response (UPR<sup>mt</sup>) in parental and FP-expressing cells.**

A Western blot analysis (SDS-PAGE) of whole-cell homogenates was used to assess the levels of the following proteins: LONP1, mtHSP70, mtHSP60, CLPP, and CHOP.  $\beta$ -actin was used as a cellular loading control. MW indicates molecular weight in kDa. Effect of the expression inducer DOX (1  $\mu$ g/ml, 24 h) and CAP (40  $\mu$ g/ml, 72 h), alone and in combination (i.e., 48-h CAP treatment followed by 24 h CAP + DOX treatment), on protein levels in FP-expressing HeLa cell lines (AcGFP1<sup>2</sup>, AcGFP1<sup>3</sup>, and AcGFP1<sup>4</sup>). Individual panels were contrast-optimized for visualization purposes. Original blots are presented in Appendix Fig S4.

B Quantitative analysis of protein levels in panel A and in HeLa parental cells (the open symbols reflect data for the parental cells in Appendix Fig S5B). All signals were normalized on  $\beta$ -actin and expressed as % of the condition without DOX and CAP (“-DOX-CAP”). Effects previously associated with UPR<sup>mt</sup> induction are marked: “Up” indicates proteins that are expected to be upregulated upon UPR<sup>mt</sup> induction, “Down” indicates proteins that are expected to be downregulated upon UPR<sup>mt</sup> induction.

Data information: The effects of DOX, CAP, and DOX + CAP were compared with the “-DOX-CAP” (untreated) condition (i.e., with the dotted line marked “&”) by testing whether the mean value for each protein (i.e., within each gray box in panel B) differed from 100% (using a one-sample Student’s *t*-test). Comparisons with the DOX only condition (+DOX; marked “a”) and CAP-only condition (+CAP; marked “b”) were performed using an independent two-population *t*-test (i.e., between each gray box for each protein). Not significant is marked by n.s.

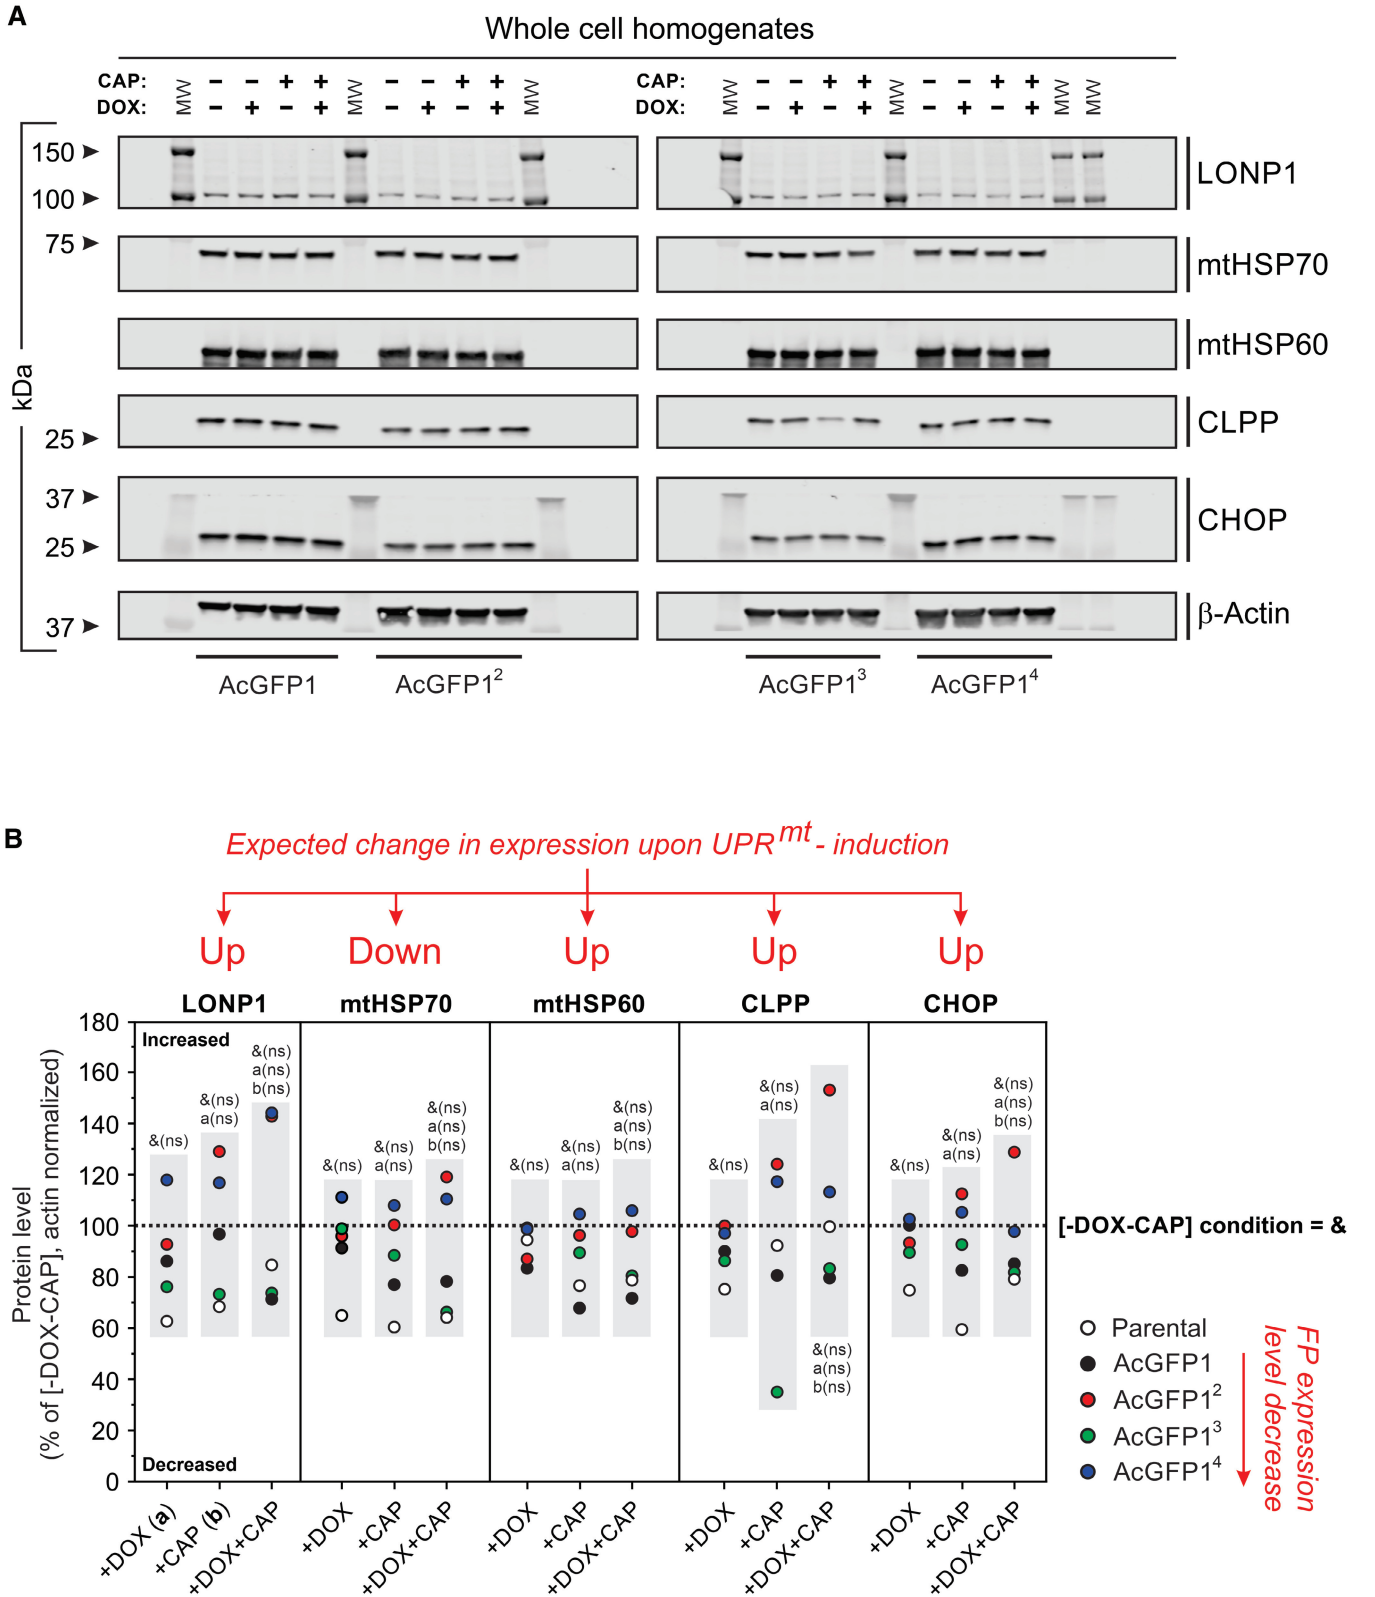

Figure EV3.
