# Supplementary material for: Stress‐dependent macromolecular crowding in the mitochondrial matrix
Source: PubMed Central journal article supplement — EMBO J. 2023 Feb 24;42(7):e108533. doi: 10.15252/embj.2021108533 (PMC10068333; doi:10.15252/embj.2021108533), 2023-02-24
Supplement: EMBJ-42-e108533-s003.pdf [file EMBJ-42-e108533-s003.pdf]

## **APPENDIX - TABLE OF CONTENTS**

### **1. Appendix Supplementary Methods [PAGE 2-9]**

- Generation of HeLa cell lines – **PAGE 2**
- Mitochondrial colocalization analysis – **PAGE 2-3**
- Flowcytometry – **PAGE 3**
- Fluorescence recovery after photobleaching experiments – **PAGE 3-4**
- SDS-PAGE, in-gel fluorescence analysis and Western blotting of mitochondrial fractions – **PAGE 4**
- SDS-PAGE and Western blotting of whole-cell lysates – **PAGE 4**
- Oxygen consumption (OCR) and extracellular acidification rate (ECAR) measurements – **PAGE 4-5**
- TMRM measurements – **PAGE 5**
- Quantification of mitochondrial DNA content – **PAGE 5**
- Electron microscopy – **PAGE 5-6**
- Simulation modelling of mitochondrial FRAP experiments – **PAGE 6-7**
- Calculation of solvent viscosity ( $\eta_{\text{solvent}}$ ) from  $D_{\text{solvent}}$  using the He-Niemeyer equation – **PAGE 7-8**
- Calculation of solvent viscosity ( $\eta_{\text{solvent}}$ ) from  $D_{\text{solvent}}$  using the Young equation – **PAGE 8**
- Calculation of solvent viscosity ( $\eta_{\text{solvent}}$ ) from  $D_{\text{solvent}}$  using the Tyn-Gusek equation – **PAGE 8**
- Calculation of solvent viscosity ( $\eta_{\text{solvent}}$ ) from  $D_{\text{solvent}}$  using the Stokes-Einstein equation – **PAGE 8-9**

### **2. Appendix Supplementary Results [PAGE 9-10]**

- Chloramphenicol but not doxycycline induces a glycolytic switch– **PAGE 9**
- Chloramphenicol increases mitochondrial TMRM fluorescence – **PAGE 9**
- Chloramphenicol and doxycycline do not increase the protein levels of mitochondrial unfolded protein response markers – **PAGE 9-10**
- Chloramphenicol does not alter mitochondrial DNA copy number and the level of key mitochondrial fission and fusion proteins – **PAGE 10**
- Predicted level of macromolecules and volume exclusion in the absence and presence of CAP – **PAGE 10**

### **3. Appendix Supplementary Figures [PAGE 11-15]**

- Appendix Figure S1: Original in-gel fluorescence scans and Western blots. – **PAGE 11**
- Appendix Figure S2: Analysis of mitochondrial fluorescence recovery after photobleaching (FRAP) experiments and quantification of mitochondrial radius ( $R_{\text{mito}}$ ) and length ( $L_{\text{mito}}$ ). – **PAGE 12**
- Appendix Figure S3: Synthetic FRAP data generated by the BD model. – **PAGE 13**
- Appendix Figure S4: Original blots for analysis of UPR<sup>mt</sup> proteins in FP-expressing cells. – **PAGE 14**
- Appendix Figure S5: Original blots for analysis of fission/fusion and UPR<sup>mt</sup> proteins in HeLa parental cells. – **PAGE 15**

### **4. Appendix Supplementary Tables [PAGE 16-24]**

- Appendix Table S1: Sequences and MW of the AcGFP1 concatemers – **PAGE 16**
- Appendix Table S2: Experimental  $D_{\text{solvent}}$  values in aqueous solution and in the cell – **PAGE 17-22**
- Appendix Table S3: Interpretation of the data sets in Appendix Table S2 – **PAGE 23**

### **5. Appendix Supplementary References [PAGE 24-27]**

## **1. Appendix Supplementary Materials and methods**

**Generation of HeLa cell lines** - AcGFP1 is an inert monomeric fluorescent protein derived from *Aequorea coerulea*, the intense illumination of which is not phototoxic (Bulina *et al.*, 2006; Bell *et al.*, 2007; Dieteren *et al.*, 2008; Dieteren *et al.*, 2011). HeLa cell lines stably expressing AcGFP1 or AcGFP<sup>2</sup> were generated using the same vector constructs as described previously for HEK293 cells (Dieteren *et al.*, 2008). To this end, cDNA of the *cox8* leader sequence (first 210 base pairs of sequence NM\_00004074) was generated by Gateway-adapted PCR procedures according to the manufacturer's instructions (Invitrogen Thermo Fisher, Carlsbad, CA, USA). A *cox8*-entry clone was generated from the resulting PCR product by recombination with pDONR201 (Invitrogen) using Gateway Clonase II Enzyme Mix (Invitrogen). An AcGFP1 destination vector was generated by subcloning the BamHI/NotI restriction fragment of pAcGFP1-N1 (Clontech, Westburg, Leusden, The Netherlands) in-frame behind Gateway Reading Frame Cassette B (Invitrogen) in pcDNA5/FRT/TO (Invitrogen). To obtain an inducible vector containing mitochondrial matrix-targeted AcGFP1, the entry vector was recombined with the AcGFP1 destination vector by using Gateway LR Clonase II Enzyme Mix (Invitrogen). In the same manner, a tandem mitochondrial AcGFP1 expression vector (AcGFP1<sup>2</sup>) was created by first generating an entry vector containing the *cox8* leader sequence linked to the N-terminus of AcGFP1 (without the stop codon) and then recombining this entry clone with the AcGFP1-destination vector. To create a *cox8-cox8*-AcGFP1 entry clone, the *cox8*- sequence of the *cox8*-AcGFP1 entry clone was replaced by a *cox8-cox8* sequence amplified from a "Pericam" vector (Palmer *et al.*, 2004) using the primers: Fwd\_5'aaatttaaGGGCCCAAATAATGATTTTATTTTGA3' and Rev\_5'ataataataACCGGTTTGAGATCTCCCTCCGGCGGCAA3' using the ApaI and AgeI restriction sites for ligation. Accuracy of the vector was confirmed by sequencing. To create a triple AcGFP1 expression vector (AcGFP1<sup>3</sup>), an AcGFP1<sup>3</sup> destination vector was generated by consecutive cloning steps. First, an AcGFP1 fragment was generated by PCR using the primers Fwd\_5'tatataACCGGTATCGATAaaattGCTAGCcatggtgagcaaggcgccgag3' and Rev\_5'tatataaccggtATGCATAacaattgGATATCcttgtagctcatcatgcc3' on pAcGFP-N1 (Clontech) as a template, and ligated into the AgeI site of the AcGFP1 destination vector, delivering an AcGFP1<sup>2</sup> destination vector. Subsequently, the *cox8-cox8*-AcGFP1 entry clone was recombined with this AcGFP1<sup>2</sup> destination vector using Gateway LR Clonase II Enzyme mix (Invitrogen), generating a *cox8-cox8*-AcGFP1<sup>3</sup> expression vector. Unfortunately, this expression vector displayed suboptimal mitochondrial expression (data not shown). As an alternative strategy, an AcGFP1 fragment was generated by PCR with primers Fwd\_5'tttttGATATCcCGCCGACCCAGCTTTCTTGT3' and Rev\_5'tttttATGCATgTCGATACCGGTGGATCATCAAC3' with *cox8-cox8*-AcGFP1<sup>3</sup> expression vector as template, and ligated into the EcoRV and NsiI sites of the AcGFP1<sup>2</sup> destination vector. This AcGFP1<sup>3</sup> destination vector was recombined with the *cox8*-entry vector and the *cox8-cox8*-AcGFP1 entry vector using Gateway LR Clonase II Enzyme mix (Invitrogen), generating the AcGFP1<sup>3</sup> and AcGFP1<sup>4</sup> expression vectors used further in this study, respectively. HeLa T-REx Flp-in cells were stably transfected using Superfect Transfection Reagent (Qiagen, Venlo, The Netherlands) according to the manufacturer's protocol and cultured for selection in the presence of 200 µg/ml hygromycin (#10687010; Invitrogen) in Dulbecco's modified Eagle's medium (DMEM; #31966; Gibco Thermo-Fisher, MD, Gaithersburg, USA) supplemented with 10% (v/v) fetal bovine serum (#10270; Gibco), 1% (v/v) penicillin/streptomycin (#15140; Gibco) and 4 µg/ml blasticin (#R21001; Gibco). The DMEM also contained 25 mM D-glucose, 3.97 mM L-Alanyl-L-Glutamine (GlutaMAX) and 1 mM pyruvate. Parental cells were cultured in the presence of 50 µg/ml zeocin (#R25001; Invitrogen) instead of hygromycin. All cell lines were tested for mycoplasma contamination and found negative.

**Mitochondrial colocalization analysis** - HeLa cells were cultured on glass-bottomed WillCo<sup>®</sup> dishes (WillCo Wells B.V., Amsterdam, The Netherlands) and induced with doxycycline (1 µg/ml; 24 h). Next, the cells were incubated with 1 µM MitoTracker Red CM-H2XRos (#M7513; Invitrogen) for 30 min in the dark (37°, 95% air, 5% CO<sub>2</sub>). Then, the cells were washed with a colourless HEPES-Tris (HT) solution

(132 mM NaCl, 4.2 mM KCl, 1 mM CaCl<sub>2</sub>, 1 mM MgCl<sub>2</sub>, 5.5 mM D-glucose and 10 mM HEPES, pH 7.4) and fluorescence microscopy images were acquired using a ZEISS LSM510 Meta confocal microscope (**Carl Zeiss B.V., Sliedrecht, The Netherlands**) using a Plan-Apochromat 63x/1.40 Oil DIC objective (**Carl Zeiss**), a zoom factor of 2 and an optical slice thickness of < 1 μm. AcGFP1 and MitoTracker Red fluorescence signals were collected following excitation at 488 nm (Argon laser; set at 2% transmission) and 543 nm (Helium/Neon laser; 43% transmission), respectively. AcGFP1 fluorescence was detected using a 488nm dichroic mirror and a 500-530 nm band pass filter. MitoTracker Red fluorescence was detected using a 543 nm dichroic mirror and a 560 nm long pass filter.

**Flowcytometry** - HeLa T-REx Flp-in cells were cultured in 24-well plates (#662160; **Cellstar, Greiner Bio-One International GmbH, Alphen aan de Rijn, The Netherlands**). Using half of the wells, expression of AcGFP1 concatemers was induced with doxycycline (1 μg/ml; 24 h). Prior to flowcytometry measurements cells were trypsinized, washed with PBS and resuspended in colourless DMEM (#A14430-01; **Gibco**). Cells were analyzed using a FACSCalibur flow cytometer (**BD Biosciences, Alschwil, Switzerland**) and data was exported to Excel using FloJo software.

**Fluorescence recovery after photobleaching experiments** - For FRAP analysis (e.g. [Lorén \*et al.\*, 2015](#)), cells were seeded in glass-bottomed WillCo® dishes (**WillCo Wells B.V., Amsterdam, The Netherlands**) and grown to ~70% confluence. As a reference, the cox8-AcGFP1-expressing cell line (“AcGFP1”) was included on each day of experiments. Measurements were performed using a ZEISS LSM510 Meta confocal microscope (**Carl Zeiss**) at 20 °C (293K) to minimize mitochondrial movement ([Koopman \*et al.\*, 2006](#); [Dieteren \*et al.\*, 2008](#); [Dieteren \*et al.\*, 2011](#)). Images were acquired at 10 Hz using a Plan-Apochromat 63x oil immersion objective (NA=1.4; **Carl Zeiss**). Pre- and post-bleach imaging was performed using 488 nm excitation light (Argon laser; set at 3% transmission), a 488 nm dichroic mirror and a 505 nm longpass filter. First the pre-bleach fluorescence level was recorded, after which AcGFP1 photobleaching was performed (Argon laser; set at 100% transmission for 100 ms) in a FRAP region of 10x10 pixels (measuring 1.4x1.4 μm). Routinely, a zoom factor of 4 was used and pinhole settings were chosen to achieve an optical thickness of < 2 μm. Only single mitochondria that were fully located within the focal plane were used for analysis (confirmed by an axial scan through the filament). Only mitochondria in which FRAP was paralleled by fluorescence loss in photobleaching (FLIP) in a part distal to the FRAP region were considered to possess a continuous mitochondrial matrix and included in the analysis (**Appendix Fig. S2A-B-C**). In our experiments the size of the FRAP region is relatively large when compared to the size of the mitochondrion. Therefore, the experimental FRAP curves (F(t)) were corrected as described previously ([Goodwin & Kenworthy, 2005](#); [Dieteren \*et al.\*, 2011](#)) using:

$$F(t) = 100 \times \frac{(F(t)_{\text{FRAPregion}} - F(t)_{\text{background}})}{(F(t)_{\text{totalmito}} - F(t)_{\text{background}})} \times \frac{(F_{i,\text{totalmito}} - F_{\text{background}})}{(F_{i,\text{FRAPregion}} - F_{\text{background}})} \quad \text{[Equation-I]}$$

Here the fluorescence intensity in the bleached mitochondrial region ( $F(t)_{\text{FRAPregion}}$ ) and for the total mitochondrion ( $F(t)_{\text{totalmito}}$ ), is background-corrected ( $F(t)_{\text{background}}$ ) at each time point. Next, the corrected fluorescence signal in the bleached region is divided by the corrected intensity of the total mitochondrion to correct for the loss of mitochondrial fluorescence during the bleach. The corrected data are normalized to the background-corrected pre-bleach intensity ( $F_{i,\text{FRAPregion}}$  and  $F_{i,\text{totalmito}}$ ) and multiplied by 100 to yield a percentage of pre-bleach fluorescence (**Appendix Fig. S2**). Applying **[Equation-I]** also corrects for photobleaching induced by normal image acquisition. Mean fluorescence recovery curves were calculated by averaging multiple FRAP recordings from single mitochondria. This averaging improved the signal-to-noise ratio, which facilitated convergence of the Levenberg-Marquardt algorithm ([Levenberg, 1944](#); [Marquardt, 1963](#)) used for fitting of the average FRAP curves with a mono-exponential equation ([Dieteren \*et al.\*, 2011](#)):

$$F(t) = y_0 + A_{\text{mono}} \left( 1 - e^{-\frac{t}{T_{\text{mono}}}} \right) \quad \text{[Equation-II]}$$

With  $T_{\text{mono}}$  representing the FRAP time constant. The mobile fraction ( $F_m$ ) was calculated from the average FRAP curves using:

$$F_m = \frac{F_{\infty} - F_0}{F_i - F_0} \quad \text{[Equation-III]}$$

With  $F_{\infty} = y_0 + A_{\text{mono}}$  being the fluorescence intensity at  $t = t_{\infty}$ .  $F_0$  equals the starting fluorescence level directly after the bleach pulse (as % of the pre-bleach value) and the pre-bleach fluorescence signal ( $F_i$ ) is set at 100% (due to application of [Equation I]).

**SDS-PAGE, in-gel fluorescence analysis and Western blotting of mitochondrial fractions** - Cells were harvested by trypsinization, washed with cold PBS, centrifuged (5 min, 1000 g, 4°C) and resuspended in 250 µL MSE buffer (225 mM mannitol, 75 mM D-sucrose and 1 mM Na-EDTA, pH 7.4) supplemented with 1x protease inhibitor cocktail (#05892791001; **Roche Diagnostics Merck**). Cells were exposed to three cycles of cold (liquid nitrogen) and heat shock (37°C) and homogenized with a micro pestle. Cell debris was pelleted by centrifugation (15 min, 600 g, 4°C). The supernatant was centrifuged at high speed in order to pellet mitochondria (15 min, 10,000 g, 4°C). The mitochondrial pellet was dissolved in 40 µL PBS containing 2% (w/v) β-lauryl maltoside and incubated on ice for 10 minutes. Protein concentrations were determined using Protein Assay Dye Reagent Concentrate (#500-0006; **Bio-Rad Laboratories, Hercules, CA, USA**). Spectrophotometric absorbance was measured at 595 nm in a Benchmark Plus plate reader (**Bio-Rad**). Mitochondrial fractions were run on a 4-15% SDS-PAGE gel. First, the gel (40 µg protein per lane) was used for “in-gel” fluorescence analysis of AcGFP1 using a ChemiDoc MP imaging system (**Bio-Rad**). Next, the same gel was used for Western blotting and immunodetection using a rabbit polyclonal antibody against EGFP (kindly provided by F.J. van Kuppeveld, Dept. of Medical Microbiology, Radboudumc, The Netherlands) and a mouse monoclonal antibody against VDAC1 (#MABN504, 1:1000; **Merck**). Anti-rabbit IRDye800 and anti-mouse IRDye680 (**Li-cor Biosciences, Lincoln, NE, USA**) antibodies were used as secondary antibodies. Blots were scanned using an Odyssey CLx scanner (**Li-cor**).

**SDS-PAGE and Western blotting of whole-cell lysates** - Cells were harvested as described in the previous section. Cell pellets were resuspended in RIPA buffer (50 mM Tris-HCl (pH 7.4), 50 mM NaCl, 1% (v/v) Triton X-100, 5 mM Na<sub>2</sub>EDTA, 10 mM Na<sub>4</sub>P<sub>2</sub>O<sub>7</sub>·10H<sub>2</sub>O, 50 mM NaF, 1x Protease Inhibitor Cocktail (#05892791001; Roche), 1 x PhosStop (#04906845001; Roche) and 100 µg/mL DNase I (#79254; Qiagen)) and incubated on ice for 30 min and vortexed every 5 min. Debris was pelleted by centrifugation (10 min, 13.000 rpm, 4°C) and the supernatant was saved to serve as whole cell lysate. Protein concentrations were determined as described in the previous section. Whole-cell lysates (20-25 µg per lane) were run on a 4-15% SDS-PAGE gel and used for Western blotting and immunodetection using the following antibodies: Rabbit-anti-mtHSP60 (#NBP2-67517; **Novus Biologicals, Centennial, CO, USA**), Mouse-anti-mtHSP70/GRP75/HSPA9B/Mortalin (#NBP1-47801; **Novus**), Mouse-anti-LONP1 (#66043-1-Ig; **Proteintech Europe, Manchester, United Kingdom**), Mouse-anti-CLPP (#WH0008192M1; **Merck/Sigma-Aldrich Chemie N.V., Zwijndrecht, The Netherlands**), Rabbit-anti-CHOP/GADD153 (#NBP2-66856; **Novus**), Mouse-anti-OPA1 (#H00004976-M01; **Abnova, Taipei, Taiwan**), Mouse-anti-DRP1 (DLP1; #611112; **BD Transduction Lab**), Rabbit-anti-MFN2 (#m6444; **Sigma-Aldrich**), Mouse-anti-Porin (Porin/VDAC1; #MABN504; 35-kDa; **Merck Millipore**) and Mouse-anti-beta-actin (#A5441; **Sigma-Aldrich**). Blots were scanned using an Odyssey CLx scanner (**Li-cor**).

**Oxygen consumption rate (OCR) and extracellular acidification rate (ECAR) measurements** - On the day of measurement, a Cell Culture Microplate (#101085-004; **Agilent, Santa Clara, CA, USA**) was coated with Cell-Tak® (#734-1081; **BD Biosciences, San Jose, CA, USA**; 22.4 µg/ml in 0.1 M NaHCO<sub>3</sub>) at 37°C (non CO<sub>2</sub>-corrected atmosphere) for at least 1 h. Next, cells were seeded at a density of 30,000

cells/well (6 replicates for each condition) in non pH-buffered Seahorse medium (DMEM containing 2 mM glutamine, 11 mM D-(+)glucose and 1 mM pyruvate; pH set to 7.4 with NaOH). Next, the plates were placed in an incubator without CO<sub>2</sub> correction for 1 h at 37°C. Using a Seahorse® XFe96 Analyzer (**Agilent**), the oxygen consumption rate (OCR) and extracellular acidification rate (ECAR) were measured for each well. Basal OCR/ECAR was quantified using three cycles (each consisting of 3 min of mixing followed by 3 min of recording). A similar approach was used to subsequently quantify the effects of 1 μM oligomycin (OLI; #75351; **Sigma**), two additions (2 μM and 1 μM) of carbonyl cyanide-p-trifluoromethoxyphenylhydrazone (FCCP; #C2920; **Sigma**) and the combined addition of 1.25 μM rotenone (ROT; #R887; **Sigma**) and 2.5 μM antimycin A (AA; #A8674; **Sigma**). Individual wells with zero OCR values and the corresponding ECAR data points were excluded from the analysis.

**TMRM measurements** - Cells were seeded at a density of 10,000/dish (FluoroDishes®; #FD35-100; **World Precision Instruments Ltd., Friedberg Germany**). Following 24 h of culturing, the DMEM medium was replaced by DMEM containing 40 μg/ml chloramphenicol (CAP; #C0378; **Sigma**). Prior to microscopy analysis, cells were incubated (in the dark; humidified atmosphere; 95% air; 5% CO<sub>2</sub>, 25 min, 37°C) with 15 nM tetramethylrhodamine methyl ester (TMRM; #T668; **Life Technologies Thermo Fisher Scientific, Waltham, MA, USA**) diluted from a DMSO-dissolved stock solution. Directly following this incubation, the cells were placed on the stage of a fully motorized inverted microscope (**Carl Zeiss**; described in detail elsewhere: [Nooteboom \*et al.\*, 2012](#)). Fluorescence images were acquired within 15 min after incubation in the continuous presence of 15 nM extracellular TMRM using an 40x/1.3 NA Plan NeoFluar objective (**Carl Zeiss**), 540 nm excitation light delivered by a monochromator (**TILL Photonics, Gräfelfing, Germany**), a 560 nm dichroic mirror (#XF2017; **Omega, Brattleboro, VT, USA**), a 656 long pass emission filter (XF3085; **Omega**) and a CoolSNAP HD camera (**Roper Scientific, Evry Cedex, France**). For each cell, mitochondrial TMRM fluorescence was manually determined in two regions of interest (ROIs) defined in a mitochondria-dense and nucleoplasmic part of the cell and corrected for background using an ROI outside of the cell (**Fig. EV2D**).

**Quantification of mitochondrial DNA content** - Total DNA was isolated using the QIAamp DNA Mini Kit (**Qiagen, Manchester, UK**), according to the manufacturer's guidelines. DNA was eluted (100 μl elution buffer), and concentration was determined by NanoDrop (Labtech International, UK). To avoid dilution bias ([Malik \*et al.\*, 2011](#)), 30 μl of template DNA at a concentration of 10 ng/ μl was fragmented by sonication for 10 min at 38 kHz in a bath sonicator (**Pulsatron 55; Kerry Ultrasonics, London, UK**). Real-time qPCR was used to quantify absolute copy number of mtDNA per cell using primer sequences targeting human mtDNA (hMito) and the human nuclear gene beta-2-microglobulin (hB2M) (see: [Thubron \*et al.\*, 2019](#) for primer sequences). Each 10 μl reaction consisted of 8 μl Master Mix (5 μl 2x Quantifast SYBR Green Master Mix (**Qiagen**), 500 nM forward and reverse primer, made up to volume with RNAase-free water) and 2 μl total DNA. Samples were loaded onto a 96-well plate in triplicate alongside a standard curve consisting of a serial dilution of 10<sup>8</sup>–10<sup>2</sup> copies of primer-specific PCR amplicons. All reactions were performed using the LightCycler 96 Real Time PCR System (**Roche Diagnostics Merck**) and adhering to the MIQE (minimum information for publication of quantitative real-time PCR experiments) guidelines ([Bustin \*et al.\*, 2009](#)). Absolute mtDNA copy number was calculated using the standard curve and is presented as a ratio of mitochondrial (hMito) to nuclear (hB2M) targets, representing cellular mtDNA content as described previously (MtN; [Malik \*et al.\*, 2011](#); [Ajaz \*et al.\*, 2015](#)).

**Electron microscopy** - This approach was adapted from our earlier study ([Koopman \*et al.\*, 2008a](#)). Cells were seeded on Corning 35 mm dishes (430166), induced with doxycycline and optionally treated with CAP as described for the TMRM measurements (see above). Cells were fixed for 1 h in 2% glutaraldehyde in 0.1 M sodium cacodylate buffer (CaCo) and post-fixed for 30 min in 1% osmium tetroxide and 1% potassium ferrocyanide in 0.1 M CaCo. After being washed in buffer, cells were dehydrated in an ascending series of aqueous ethanol and were subsequently transferred via a mixture of ethanol and Epon to pure Epon as embedding medium. Sections of 80 nm were cut parallel to the bottom of the dishes, contrasted with 2%



uranyl acetate, counterstained with lead citrate and examined in a JEOL JEM 1400 electron microscope (JEOL Europe B.V., Nieuw-Vennep, The Netherlands) operating at 80 kV. Mitochondrial length was determined with Fiji software (<https://imagej.net/Fiji>) using the Analyse/Measure option and drawing a line transecting the mitochondrion. The number of cristae was manually counted. Next, for each mitochondrion the number of cristae per  $\mu\text{m}$  was calculated by dividing the number of cristae by mitochondrial length.

**Simulation modelling of mitochondrial FRAP experiments** - Our FRAP analysis demonstrates that all AcGFP1 concatemers are highly mobile within the mitochondrial matrix in the absence of chloramphenicol (*i.e.*  $F_\infty > 91\%$ ; **Table 1**). To allow interpretation of  $T_{\text{mono}}$  in terms of a mitochondrial matrix solvent-dependent solute diffusion constant ( $D_{\text{solvent}}$ ) and calculation of mitochondrial matrix solvent viscosity ( $\eta_{\text{solvent}}$ ; see below), we developed a particle-based Brownian Dynamics (BD) simulation model (*e.g.* **Erbán, 2014; Huber & McCammon, 2019**). Fluorescence correlation spectroscopy (FCS) experiments demonstrated that EYFP in the mitochondrial matrix is not affecting its own diffusion up to a concentration of  $10 \mu\text{M}$  (**Willems *et al.*, 2009**). Therefore, in the BD model we routinely used an FP concentration ( $C_p$ ) of  $10 \mu\text{M}$  and assumed that FPs move independently. Given the fact that AcGFP1 is an inert monomeric protein (**Bulina *et al.*, 2006; Bell *et al.*, 2007**), with no known binding partners, it was further assumed that AcGFP1 does not bind to the MIM (*i.e.* individual FP molecules display reflections at the MIM). In BD simulations, the three dimensional (3D) position  $\mathbf{r}_i$  of the  $i^{\text{th}}$  particle as a function of time  $t$  is integrated over a time step  $\Delta t$  according to:

$$\mathbf{r}_i(t + \Delta t) = \mathbf{r}_i(t) + \sqrt{2D_{\text{solvent}}\Delta t}\boldsymbol{\theta}_i(t) \quad \text{[Equation-IV]}$$

where the three components to the random vector  $\boldsymbol{\theta}_i(t)$  have zero mean, unit standard deviation and are devoid of correlations (Markovian). The diffusion coefficient was varied between  $0.5$  and  $50 \mu\text{m}^2/\text{s}$  and the time step was set at  $\Delta t = 10^{-5} \mu\text{m}^2/D_{\text{solvent}}$  across all simulations. The mitochondrion was modelled as a cylinder with a radius  $R_{\text{mito}}$  and a length  $L_{\text{mito}}$ . (**Appendix Fig. S3A**). These parameters were experimentally determined (**Table 1**) by intensity profile analyses as described previously (see: **Willems *et al.*, 2009** and **Appendix Fig. S2F**). In order to account for diffusion hindrance by mitochondrial cristae (**Ölveczky *et al.*, 1998; Partikian *et al.*, 1998; Dieteren *et al.*, 2011**), we performed EM analysis of mitochondrial ultrastructure (**Fig. 5A** and **Table 1**). Based upon this analysis and information in the literature (**Appelhans *et al.*, 2011; Wilkens *et al.*, 2012; Wolf *et al.*, 2019; Segawa *et al.*, 2020; Hu *et al.*, 2020; Weissert *et al.*, 2021**) it was assumed in the model that: (1) mitochondria contained regularly arranged cristae of negligible thickness perpendicular to the longitudinal axis of the mitochondrion, (2) the orientations of the cristae alternated, with consecutive cristae blocking  $-R_{\text{mito}} \leq z \leq -R_{\text{mito}} + h$  and  $R_{\text{mito}} - h \leq z \leq R_{\text{mito}}$ , respectively, with  $h$  being the length of each crista (**Appendix Fig. S3A**). The presence of cristae increased the effective length of the “channel” that connected the two ends of the mitochondrion thereby increasing FP diffusion length (**Dieteren *et al.*, 2011**). In addition, the presence of cristae reduced the diffusive flow between consecutive mitochondrial sub-compartments. All flat and cylindrical walls were implemented using the appropriate bounce-back rules and it was verified that these rules conserved a uniform density near all surfaces. Simulations were initiated by randomly distributing FP-representing particles throughout the mitochondrial matrix volume. During the bleaching phase of the simulation (lasting  $0.1 \text{ s}$ ; identical to experiments), all particles within the FRAP region ( $S_{\text{FRAP}} = 1.4 \mu\text{m}$ ; identical to experiments) at one end of the cylinder were bleached. In the subsequent recovery simulation, the number of unbleached particles in this region was monitored to compute the FRAP signal. The generated FRAP curves were averaged over ten independent simulations (*e.g.* **Appendix Fig. S3B-C**). These average curves were fitted with the same mono-exponential equation (**[Equation-II]**) as the experimental data to extract  $T_{\text{mono}}$ . This also allowed calculation of  $F_m$  and  $F_\infty$  (as explained above). Analysis of the simulated FRAP data demonstrated that each curve ultimately converged to an  $F_\infty$  value of  $1.0$  (*i.e.*  $100\%$  fluorescence recovery; equalling  $F_m$  and  $F_\infty$  values of  $1$ ). To compute  $D_{\text{solvent}}$  from the experimental  $T_{\text{mono}}$  values,  $\text{LOG}_{10}(D_{\text{solvent}})$  was plotted as a function of  $\text{LOG}_{10}(T_{\text{mono}})$  for the simulated FRAP curves and fitted with a straight line (**Fig. 3D** and **Appendix Fig. S3D**):

$$\text{LOG10}(D_{\text{solvent}}) = A + B \cdot \text{LOG10}(T_{\text{mono}}) \quad \text{[Equation-V]}$$

This yields values for A (intercept) and B (slope), which allows calculation of  $D_{\text{solvent}}$  by inserting the experimental  $T_{\text{mono}}$  value.

**Calculation of solvent viscosity ( $\eta_{\text{solvent}}$ ) from  $D_{\text{solvent}}$  using the He-Niemeyer equation** - This equation is a modified Stokes-Einstein relationship that quantitatively links  $D_{\text{solvent}}$  and  $\eta_{\text{solvent}}$  for freely diffusing spherical and cylindrical molecules (He & Niemeyer, 2003). We have previously applied this equation in our FRAP analysis of matrix-diffusing AcGFP1 and AcGFP1<sup>2</sup> in HEK293 cells (Dieteren *et al.*, 2011):

$$D_{\text{solvent}} = \frac{6.85 \cdot 10^{-8} T}{\eta_{\text{solvent}} \sqrt{MW^{\frac{1}{3}} \cdot R_G}} \quad \text{[Equation-VI]}$$

With T = temperature (in K; 293 K = 20 °C),  $\eta_{\text{solvent}}$  = solvent viscosity (in cP; 1 cP = 10<sup>-3</sup> Pa·s), MW = solute molecular weight (in g/mol),  $D_{\text{solvent}}$  = solvent-dependent diffusion constant (in cm<sup>2</sup>/s; 1.0 cm<sup>2</sup>/s = 1.0x10<sup>8</sup> μm<sup>2</sup>/s), and  $R_G$  = radius of gyration (in Angstrom; Å; 1 Å = 1.0x10<sup>-10</sup> m). Here we used [Equation-VI] to calculate  $\eta_{\text{solvent}}$  from  $D_{\text{solvent}}$  by rewriting as follows:

$$\eta_{\text{solvent}} = \frac{6.85 \cdot 10^{-8} T}{D_{\text{solvent}} \sqrt{MW^{\frac{1}{3}} \cdot R_G}} \quad \text{[Equation-VII]}$$

For calculating  $\eta_{\text{solvent}}$ , the values of T (=293K), MW (determined using the protein sequence; Appendix Table S1) and  $D_{\text{solvent}}$  (from the BD model) are known. This means that  $R_G$  needs to be determined for each AcGFP1 concatemer. Assuming that AcGFP1 displays a (minimal) spherical conformation, its  $R_G$  value can be calculated from the hydrodynamic radius ( $R_H$ ) according to (Dashevskaya *et al.*, 2008):

$$R_G = \sqrt{\frac{3}{5}} \cdot R_H = 0.775 \cdot R_H \quad \text{[Equation-VIII]}$$

For AcGFP1,  $R_H = 20 \text{ \AA}$  (Terry *et al.*, 1995; Arrio-Dupont *et al.*, 2000; Lavalette *et al.*, 2006) so  $R_G = 15.5 \text{ \AA}$ , compatible with molecular modelling results for GFP (Dashevskaya *et al.*, 2008). Inspection of the GFP crystal structure (Yang *et al.*, 1996) predicts an AcGFP1 radius (R) and length (L) of 15Å and 40Å, respectively (Figure EV1A). Because AcGFP1<sup>2</sup>, AcGFP1<sup>3</sup> and AcGFP1<sup>4</sup> may assume a non-spherical shape in the mitochondrial matrix solvent, [Equation-VIII] cannot be applied to determine their  $R_G$  value. In principle, AcGFP1<sup>2</sup>, AcGFP1<sup>3</sup> and AcGFP1<sup>4</sup> can assume two extreme configurations: “compact” and “extended” (Figure EV1B-G). In their extended configuration, we assumed the AcGFP1 concatemer structure to be cylindrical. For a rigid cylinder, the  $R_G$  about its centroidal x-axis or y-axis is given by:

$$R_G = \frac{\sqrt{9 \cdot R^2 + 3 \cdot L^2}}{6} \quad \text{[Equation-IX]}$$

In which R is the radius and L is the length of the cylinder. In case of AcGFP1<sup>2</sup>, its two AcGFP1 molecules are connected by a 14 AA linker (Appendix Table S1). For the compact AcGFP1<sup>2</sup> configuration R = 20Å, L = 60Å and  $R_G = 20.0 \text{ \AA}$  (Table 1 and Figure EV1B). When maximally stretched out, this linker has a length of 50.4Å (Minier & Sigel, 2004). This means that for the extended AcGFP1<sup>2</sup> configuration R = 15Å, L = 130Å and  $R_G = 38 \text{ \AA}$  (Figure EV1C). Similar calculations were carried out for AcGFP1<sup>3</sup> and AcGFP1<sup>4</sup> (Table 1) yielding  $R_G$  values of 20Å (AcGFP1<sup>3</sup>-compact), 73Å (AcGFP1<sup>3</sup>-extended), 20Å (AcGFP1<sup>4</sup>-

compact) and 102Å (AcGFP1<sup>4</sup>-extended). Inserting T,  $D_{\text{solvent}}$ , MW and  $R_G$  in [Equation-VII] was used to calculate  $\eta_{\text{solvent}}$  for each AcGFP1 concatemer (**Table 1**).

**Calculation of solvent viscosity ( $\eta_{\text{solvent}}$ ) from  $D_{\text{solvent}}$  using the Young equation** - The Young equation (Young, 1980) predicts  $\eta_{\text{solvent}}$  from  $D_{\text{solvent}}$  based upon the MW of the solute:

$$D_{\text{solvent}} = 8.34 \times 10^{-8} \left( \frac{T}{\eta_{\text{solvent}} \cdot \text{MW}^{\frac{1}{3}}} \right) \quad \text{[Equation-X]}$$

equalling:

$$\eta_{\text{solvent}} = 8.34 \times 10^{-8} \left( \frac{T}{D_{\text{solvent}} \cdot \text{MW}^{\frac{1}{3}}} \right) \quad \text{[Equation-XI]}$$

With: T = temperature (in K),  $\eta_{\text{solvent}}$  = solvent viscosity (in cP), MW = solute molecular weight (in g/mol),  $D_{\text{solvent}}$  = solvent-dependent diffusion constant (in cm<sup>2</sup>/s).

**Calculation of solvent viscosity ( $\eta_{\text{solvent}}$ ) from  $D_{\text{solvent}}$  using the Tyn-Gusek equation** - This approach allows prediction of  $\eta_{\text{solvent}}$  from  $D_{\text{solvent}}$  and  $R_G$  (Tyn & Gusek, 1990):

$$D_{\text{solvent}} = 5.78 \times 10^{-8} \left( \frac{T}{\eta_{\text{solvent}} \cdot R_G} \right) \quad \text{[Equation-XII]}$$

equalling:

$$\eta_{\text{solvent}} = 5.78 \times 10^{-8} \left( \frac{T}{D_{\text{solvent}} \cdot R_G} \right) \quad \text{[Equation-XIII]}$$

With T = temperature (in K),  $\eta_{\text{solvent}}$  = solvent viscosity (in cP),  $D_{\text{solvent}}$  = solvent-dependent diffusion constant (in cm<sup>2</sup>/s),  $R_G$  = solute radius of gyration (in Å).

**Calculation of solvent viscosity ( $\eta_{\text{solvent}}$ ) from  $D_{\text{solvent}}$  using the Stokes-Einstein equation** - The Stokes-Einstein equation describes the diffusion of spherical particles through a liquid (Einstein, 1905; Sutherland, 1905; von Smoluchowski, 1906):

$$D_{\text{solvent}} = \frac{\kappa_B \cdot T}{6 \cdot \pi \cdot \eta_{\text{solvent}} \cdot R_H} \quad \text{[Equation-XIV]}$$

equalling:

$$\eta_{\text{solvent}} = \frac{\kappa_B \cdot T}{6 \cdot \pi \cdot D_{\text{solvent}} \cdot R_H} \quad \text{[Equation-XV]}$$

With T = temperature (in K),  $\eta_{\text{solvent}}$  = solvent viscosity (in Pa·s; 1 Pa·s = 10<sup>3</sup> cP),  $D_{\text{solvent}}$  = solvent-dependent diffusion constant (in m<sup>2</sup>/s; 1.0 m<sup>2</sup>/s = 1.0x10<sup>12</sup> μm<sup>2</sup>/s),  $\kappa_B$  = Boltzmann's constant (1.38065x10<sup>-23</sup> J/K),  $R_H$  = solute hydrodynamic radius (in m). For AcGFP1,  $R_H$  = 20Å was taken from the literature (Terry *et al.*, 1995; Arrio-Dupont *et al.*, 2000; Lavalette *et al.*, 2006). The other AcGFP1 concatemers in their compact and extended configurations (Figure EV1B-G) were modelled as prolate ellipsoids (Perrin, 1936). In this case their  $R_H$  is given by:



$$R_H = \frac{\sqrt{(a^2-b^2)}}{\ln\left(\frac{a+\sqrt{(a^2-b^2)}}{b}\right)} \quad \text{[Equation-XVI]}$$

With  $a$  = major semi-axis of the ellipse =  $L/2$ ;  $b$  = minor semi-axis of the ellipse =  $R$ ;  $L$  = length of major axis of the ellipsoid (in Å);  $R$  = length of minor axis of the ellipsoid (in Å).

## 2. Appendix Supplementary Results

**Chloramphenicol but not doxycycline induces a glycolytic switch** - To allow interpretation of the observed CAP effects on FP diffusion in a functional context, we first studied the oxygen consumption rate (OCR) and extracellular acidification rate (ECAR) in HeLa parental cells (Divakaruni *et al.*, 2022). The incubation protocols were identical to those used for FP-induced cells (“+DOX” condition: 1 µg/ml; 24 h) and CAP-treatment of FP-induced cells (*i.e.* “+DOX+CAP”: 40 µg/ml CAP for 48 h, followed by 40 µg/ml CAP + 1 µg/ml DOX for 24 h). As a control, we also determined the effect of CAP itself (“+CAP”: 40 µg/ml for 72 h). After recording basal OCR/ECAR values, various chemicals were added (Figure EV2A-B) to inhibit the F<sub>0</sub>F<sub>1</sub>-ATPase (oligomycin; OLI), induce mitochondrial uncoupling (FCCP) and inhibit OXPHOS complex I (rotenone; ROT) and complex III (antimycin A; AA). Basal and maximal OCR were slightly increased in the +DOX condition and greatly reduced in the +CAP and +DOX+CAP condition (Figure EV2C). Basal ECAR was slightly increased in the +DOX condition and greatly increased in the +CAP and +DOX+CAP condition (Figure EV2C). Basal/maximal OCR and basal ECAR values did not significantly differ between the +CAP and +DOX+CAP condition (Figure EV2C). Taken together, these results demonstrate that DOX treatment does not inhibit mitochondrial oxygen consumption. In contrast, CAP reduces mitochondrial respiration and increases ECAR, suggesting induction of a glycolytic switch, which was not affected by DOX.

**Chloramphenicol increases mitochondrial TMRM fluorescence** - Given the central role of the electron transport chain (ETC) in sustaining the mitochondrial membrane potential ( $\Delta\psi$ ), it was next determined whether CAP affected the accumulation of the fluorescent cation TMRM, which can be used as a semi-quantitative readout of  $\Delta\psi$  (Koopman *et al.*, 2008b). It was found that CAP treatment of HeLa parental cells increased and decreased the mitochondrial and nuclear TMRM fluorescence, respectively (Figure EV2D). This suggest that CAP treatment induces  $\Delta\psi$  hyperpolarization.

**Chloramphenicol and doxycycline do not increase the protein levels of mitochondrial unfolded protein response markers** - Evidence in the literature suggests that CAP and DOX can induce the mitochondrial unfolded protein response (UPR<sup>mt</sup>), which is classically linked to the accumulation of misfolded proteins in the mitochondrial matrix (Houtkooper *et al.*, 2013; Moullan *et al.*, 2015; Shpilka and Haynes, 2018). In this way, the observed effects on FP mobility might be due to a CAP- and/or DOX-induced accumulation of unfolded proteins in the mitochondria matrix. UPR<sup>mt</sup> activation is characterized by upregulation of nuclear genes that encode mitochondrial stress proteins (Zhao *et al.*, 2002). The latter include mitochondrial heat shock protein 60 (mtHSP60) and the mitochondrial ATP-dependent Clp protease proteolytic subunit (CLPP). MtHSP60 promotor activity is controlled by the DNA damage-inducible transcript 3 protein (CHOP/CHOP-10/DDIT3) transcription factor. However, CHOP is also involved in the endoplasmic reticulum unfolded protein response (UPR<sup>ER</sup>) and therefore not UPR<sup>mt</sup> specific (Zhao *et al.*, 2002). In addition, UPR<sup>mt</sup> activation was previously linked to increased protein levels of the mitochondrial Lon Peptidase 1 (LONP1; Xu *et al.*, 2016) and reduced function of mitochondrial heat shock protein 70 (mtHSP70/mortalin; Burbulla *et al.*, 2014). Analysis of HeLa parental cells (Figure EV2E) and FP-expressing cells (Figure EV3A) revealed no changes in the above protein levels upon treatment with DOX, CAP or DOX+CAP. For statistical analysis we reasoned that if DOX and/or CAP would affect the

level of the UPR<sup>mt</sup>-linked proteins, the effect on the expression pattern of these proteins should be similar in all five HeLa cell lines (*i.e.* parental and four FP-expressing). This analysis revealed no UPR<sup>mt</sup>-characteristic changes in the expression pattern of LONP1, mtHSP70, CLPP and CHOP (**Figure EV3B**). These results suggest that UPR<sup>mt</sup> activation is not responsible for the CAP-induced increase in  $D_{\text{solvent}}$ .

**Chloramphenicol does not alter mitochondrial DNA copy number and the level of key mitochondrial fission and fusion proteins** - Within cells, mtDNA is associated in nucleoprotein complexes (“nucleoids”) and evidence in *E. coli* demonstrated that nucleoids undergo changes in shape and compaction upon CAP treatment (**Van Helvoort *et al.*, 1996**). Mitochondrial cristae structure also appears to compartmentalize nucleoids thereby preventing their free matrix diffusion (**Nicholls & Gustafsson, 2018**). Substantial nucleoid aggregation was observed upon loss of specific isoforms of the key MIM fusion protein Optic atrophy protein 1 (OPA1), which controls cristae structure and might be involved in mtDNA to MIM attachment (**Elachouri *et al.*, 2011**). Moreover, CAP prevented stress-induced OPA1 processing during dysfunction of the mitochondrial AAA protease AFG3L2 (**Richter *et al.*, 2019**). In this way, alterations in mtDNA and/or OPA1 level/processing might affect solute diffusion in CAP-treated cells. Here we observed that CAP treatment did not affect mtDNA copy number in HeLa parental cells (**Figure EV2F**). Similarly, the level of OPA1 and two other key MOM fission/fusion proteins (DRP1, MFN2) was not affected by CAP (**Figure EV2G**). This demonstrates that the observed CAP-induced increase in  $D_{\text{solvent}}$  is not linked to alterations in the levels of mtDNA, OPA1, DRP1 or MFN2.

**Predicted level of macromolecules and volume exclusion in the absence and presence of CAP** - To obtain an semiquantitative estimate of the degree of macromolecular crowding within the mitochondrial matrix solvent of HeLa cells, we used human serum albumin (HSA) as a theoretical crowding agent. The MW of hydrated HSA equals 91.675 kDa (*i.e.*  $91.675 \times 10^3$  g/mol). Structurally, hydrated HSA is a prolate ellipsoid with semi-diameters:  $a = 8.2$  nm and  $b = 2.1$  nm. Computing the volume of this ellipsoid ( $V_{\text{ellipsoid,prolate}} = (4/3) \cdot \pi \cdot b^2 \cdot a$ ) yields a HSA molecular volume of  $151 \text{ nm}^3$  (*i.e.*  $1.51 \cdot 10^{-22}$  l). The total volume of the mitochondrial matrix ( $V_{\text{mito}}$ ) equals  $\approx 8.0 \cdot 10^{-16}$  l (**Table 1**). This means that  $\approx 5.28 \cdot 10^6$  HSA molecules will fit in the mitochondrial matrix.

- In the absence of CAP, the matrix solvent viscosity ( $\eta_{\text{solvent}}$ ) was maximally 4.57 cP (**Fig. 4C**). At 20° C this viscosity value was reached at HSA concentrations of  $\approx 198 \text{ kg/m}^3$  in distilled water (**Monkos, 2004**). This concentration equals  $198/91.675 \cdot 10^3 = 2.16 \cdot 10^{-3}$  mol and  $2.16 \cdot 10^{-3} \times 6.0221 \cdot 10^{23} (N_A) = 1.30 \cdot 10^{21}$  molecules/l. With a  $V_{\text{mito}}$  of  $8.0 \cdot 10^{-16}$  l this equals a total number of  $1.30 \cdot 10^{21} \times 8.0 \cdot 10^{-16} = 1.04 \cdot 10^6$  molecules. These molecules occupy a volume fraction of  $1.04 \cdot 10^6 / 5.28 \cdot 10^6 = 19.7\%$  of the total mitochondrial matrix volume.

In CAP-treated cells  $\eta_{\text{solvent}}$  increased to a maximal value of 37.5 cP (**Fig. 5G**), being equivalent to a HSA concentration of  $\approx 328 \text{ kg/m}^3$  (**Monkos, 2004**). These concentrations are equivalent to  $1.72 \cdot 10^6$  molecules in the mitochondrial matrix, which suggests that in the presence of CAP 32.7% of the total mitochondrial matrix volume is occupied by proteins. The HSA-occupied volume is not accessible by other molecules, a phenomenon described as the “excluded volume” effect (**Minton, 1981**). In this sense, the predicted HSA volume fractions in the absence and presence of CAP agree with those reported in *E. Coli* being between 5% and 40% of the cell volume (**Akabayov *et al.*, 2013**).

### 3. Appendix Supplementary Figures

#### A. Without chloramphenicol (-CAP)

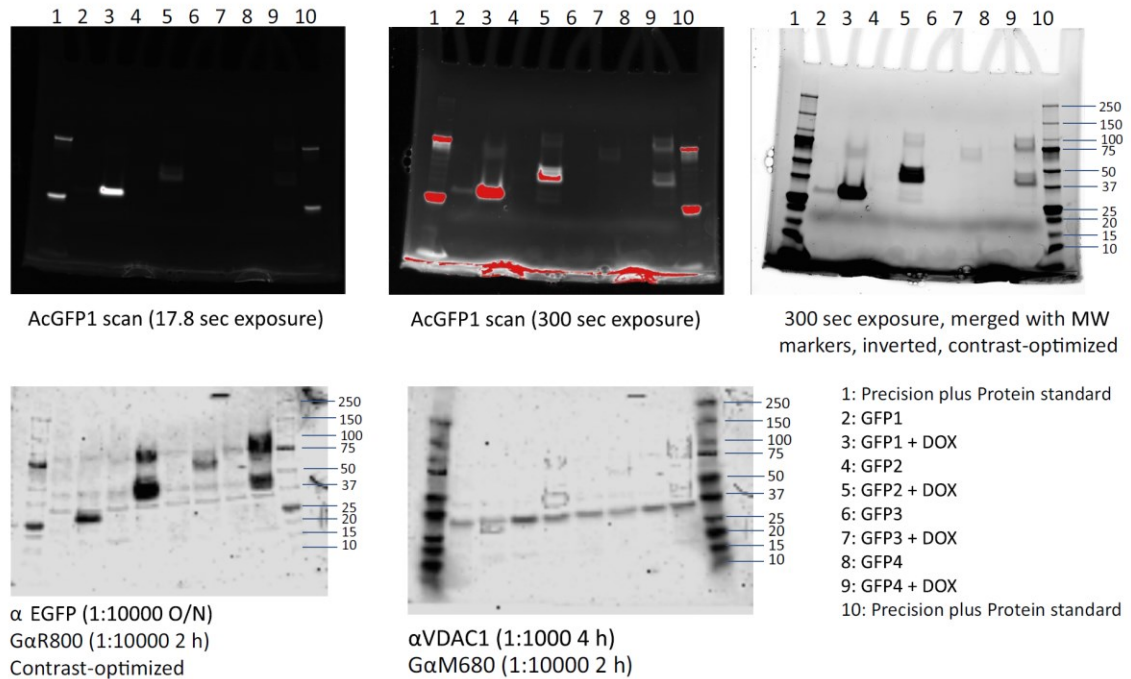

#### B. With chloramphenicol (+CAP)

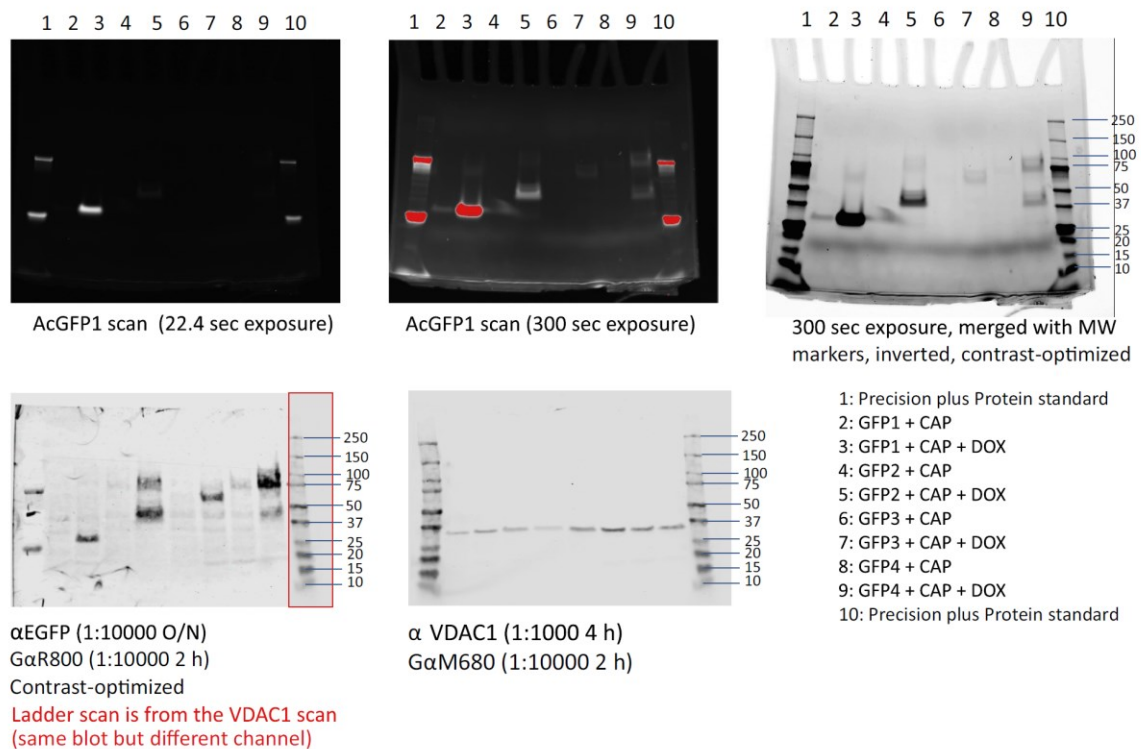

**Appendix Figure S1: Original in-gel fluorescence scans and Western blots.** The data in panel A was used to create **Fig. 2B**. The data in panel B is virtually identical to panel A, but was obtained for cells cultured in the presence of chloramphenicol (CAP).

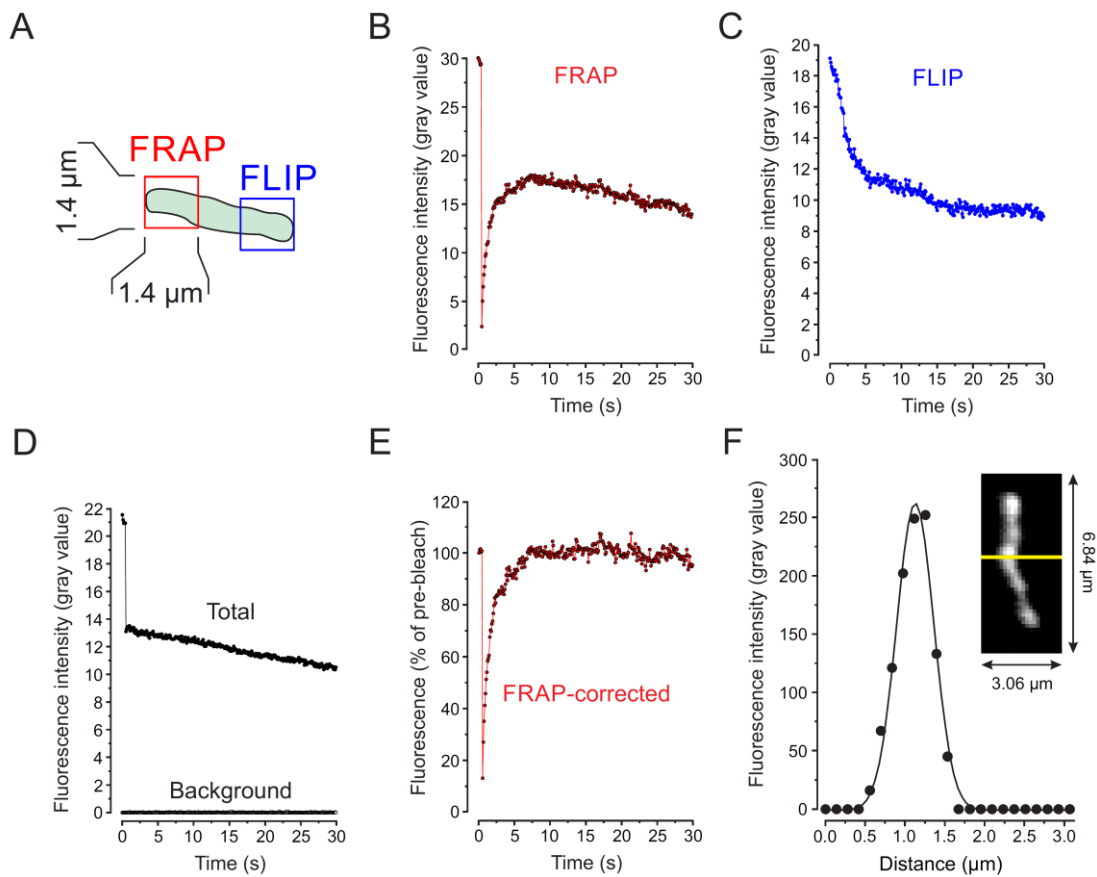

**Appendix Figure S2: Analysis of mitochondrial fluorescence recovery after photobleaching (FRAP) experiments and quantification of mitochondrial radius ( $R_{\text{mito}}$ ) and length ( $L_{\text{mito}}$ ).** In this typical example, a FRAP recording from a mitochondrion in a mitochondria-targeted AcGFP1-expressing HeLa cell is presented. (A) Geometry of the FRAP experiment. Two regions of interest (ROIs) were placed on both ends of the mitochondrion. AcGFP1 photobleaching was performed using a 1.4x1.4 μm FRAP region. Only single mitochondria that were fully located within the focal plane were used for analysis (confirmed by an axial scan). Only mitochondria in which FRAP was paralleled by fluorescence loss in photobleaching (FLIP) in a part distal to the FRAP region were considered to possess a continuous mitochondrial matrix and included in the analysis. (B) Time course of the fluorescence signal in the FRAP region. First, a pre-bleach fluorescence level was recorded, after which AcGFP1 was photobleached (fast signal drop) and fluorescence recovery (slower increase) was measured. (C) Time course of the fluorescence signal in the FLIP region. (D) Fluorescence signal in a ROI placed just outside the mitochondrion ("Background") and a rotated rectangular ROI around the complete mitochondrion ("Total"). (E) Time course of the corrected FRAP curve. In our experiments the size of the FRAP region is relatively large in comparison to the total size of the mitochondrion. Therefore, the experimental FRAP curve in panel B was corrected using the information in panel C and D using [Equation-I]. This also corrects for photobleaching during image acquisition (visible in panel D; total signal). (F) Determination of mitochondrial diameter ( $D_{\text{mito}}$ ) from confocal microscopy fluorescence images (Willems *et al.*, 2009). Mitochondrial diameter  $D_{\text{mito}}$  (equalling  $2 \cdot R_{\text{mito}}$ ) was assessed by quantifying the intensity of a 1 pixel wide profile perpendicular to the long axis of the mitochondrial filament (yellow line; image was linearly contrast stretched for visualization purposes). The width ( $w$ ) of this profile at its half-maximal height is determined by fitting a Gaussian curve:  $y = y_0 + \{A / [w \cdot \sqrt{(\pi/2)}]\} \cdot \text{EXP}\{-2 \cdot [(x - x_c)^2 / w^2]\}$ . For the given example this yielded  $w = 0.469 \mu\text{m}$  (*i.e.*  $R_{\text{mito}} = 0.248 \mu\text{m}$ ) and  $R^2 = 0.988$ . A similar strategy was used to determine mitochondrial length ( $L_{\text{mito}}$ ) by analysing the intensity profile along the length axis of the mitochondrion.

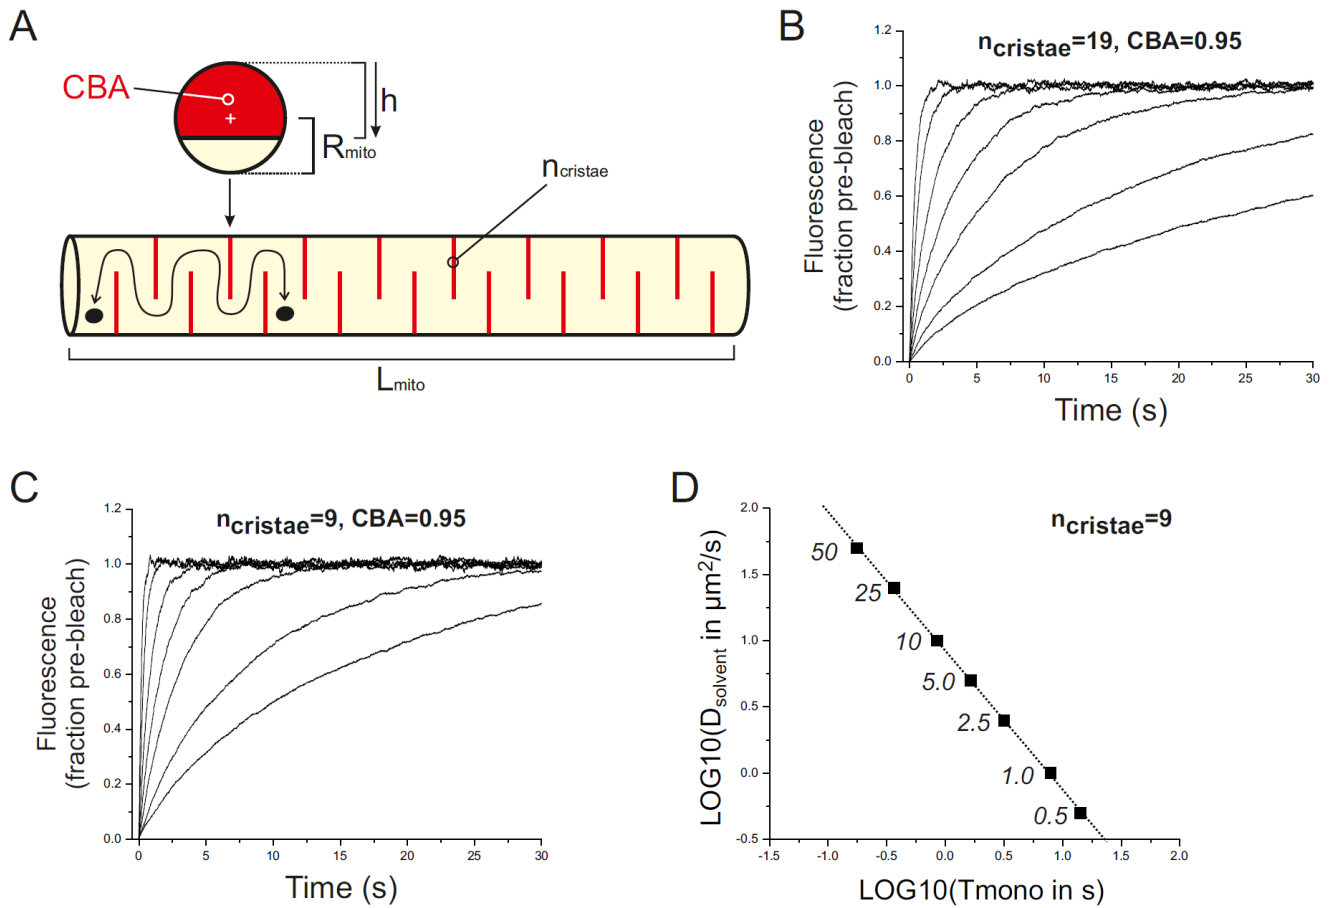

**Appendix Figure S3: Synthetic FRAP data generated by the BD model.** (A) Geometry of the BD model. See **Appendix** and **Results** for details. (B) Simulated FRAP curves for different values of the solvent-dependent diffusion constant ( $D_{\text{solvent}}$ ; see panel D for exact values in  $\mu\text{m}^2/\text{s}$ ). The number of cristae/mito ( $n_{\text{cristae}}$ ) equalled 19. The cristae-blocked area (CBA) equalled 0.95. (C) Same as panel B but now for  $n_{\text{cristae}} = 9$  and CBA=0.95. (D) Linear relationship [Equation-VI] between the FRAP recovery time constant ( $T_{\text{mono}}$ ) and the  $D_{\text{solvent}}$  value (logarithmic scale) for the data in panel C ( $R=-0.999$ ,  $p<0.0001$ ; A(intercept)= $0.923\pm 0.00569$ (SE); B(slope)=  $-1.05\pm 0.00841$  (SE)).



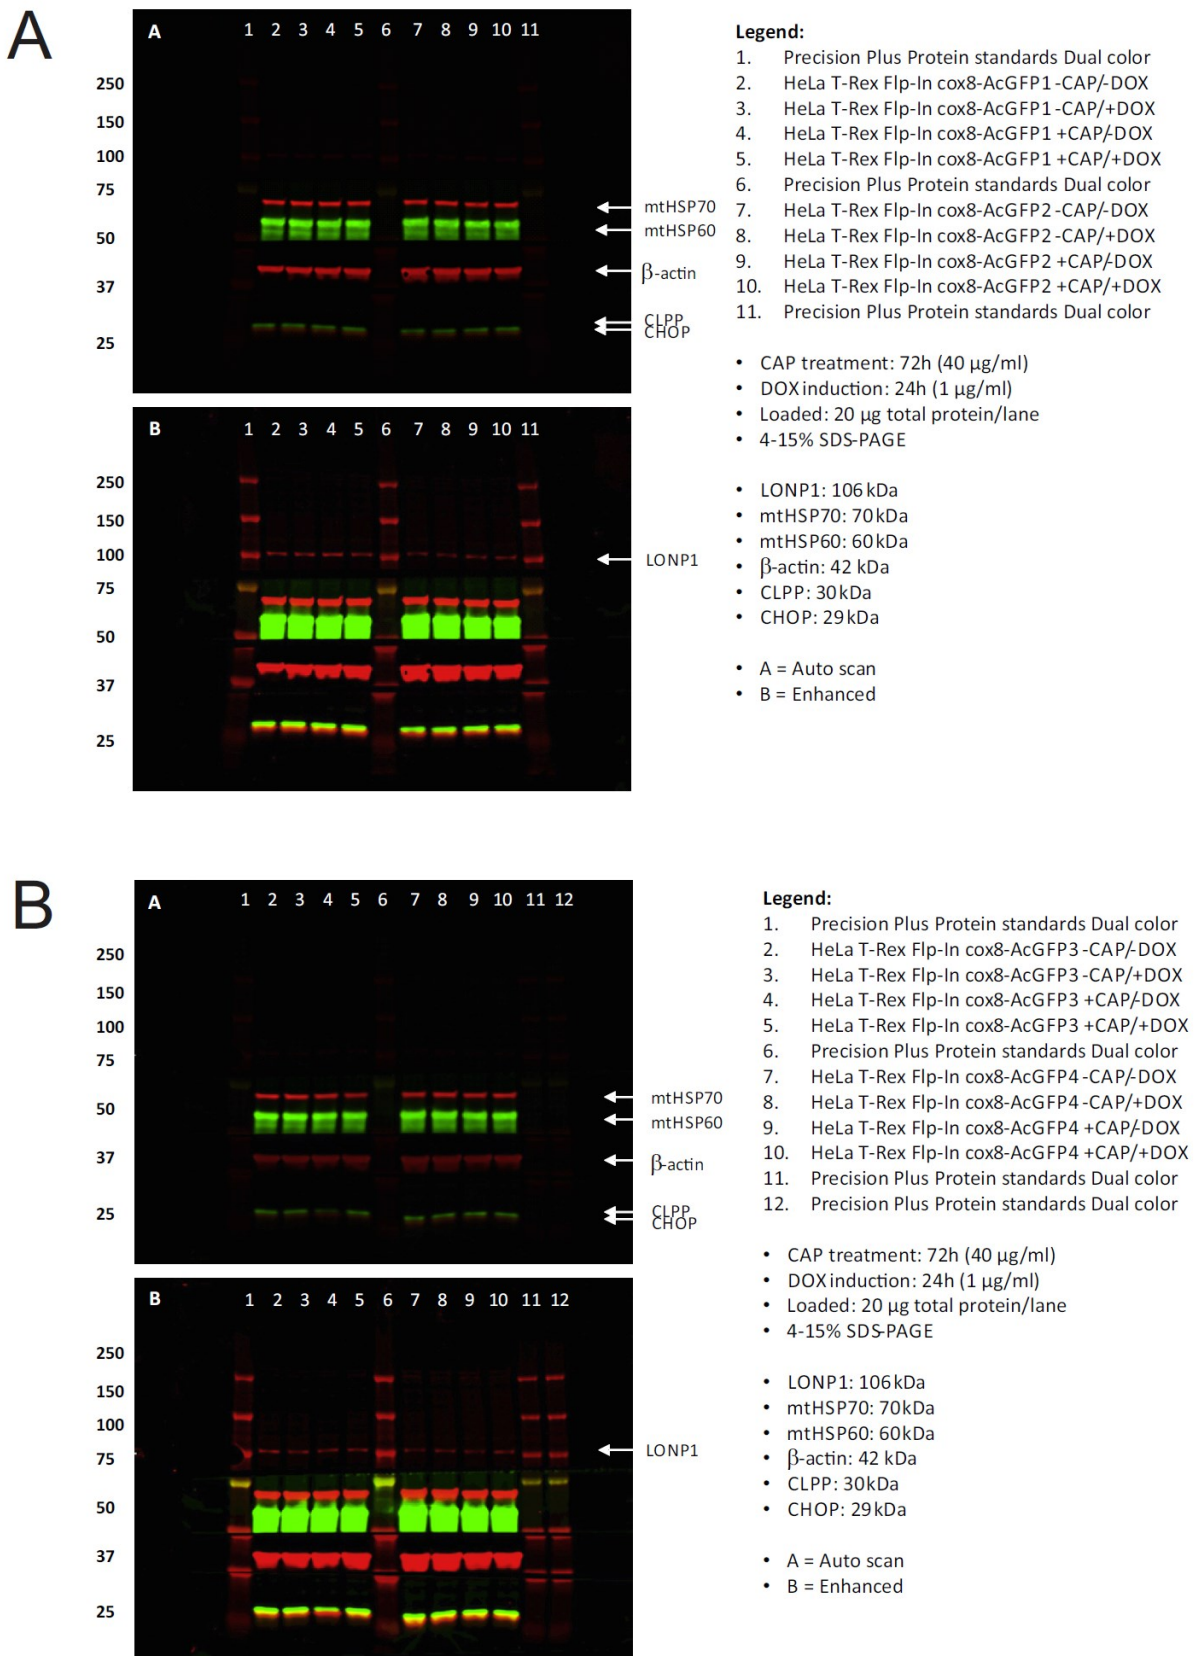

**Appendix Figure S4: Original blots for analysis of UPR<sup>mt</sup> proteins in FP-expressing cells.**

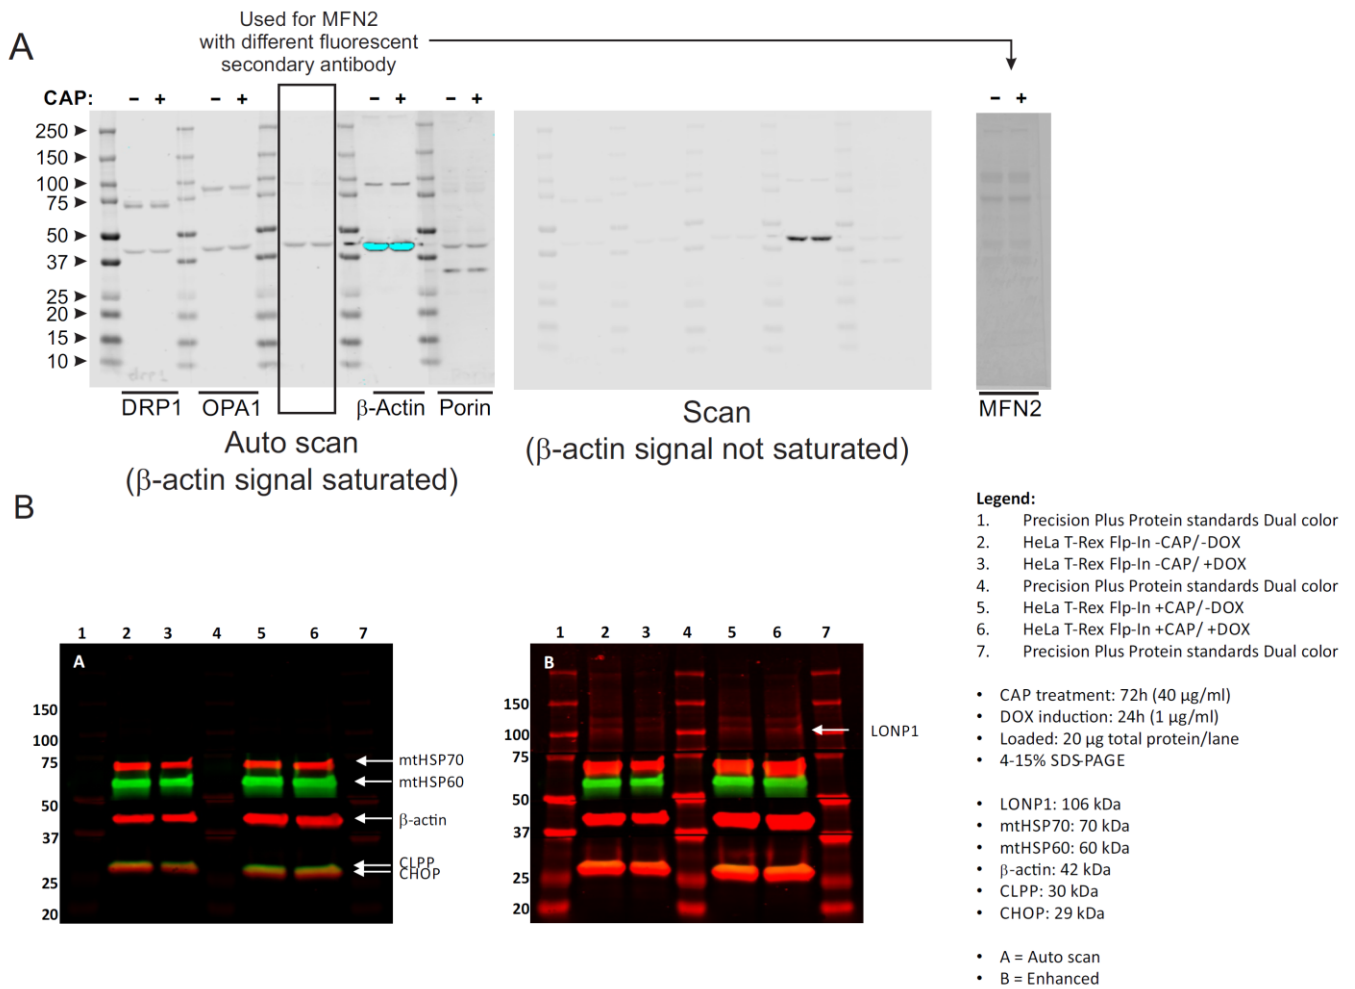

**Appendix Figure S5: Original blots for analysis of fission/fusion (panel A) and UPR<sup>mt</sup> proteins (panel B) in HeLa parental cells.**

## 4. Appendix Supplementary Tables

**Appendix Supplementary Table S1: Protein sequences, MW and dimensions of the AcGFP1 concatemers**

| Sequence                                                                                                                                                                                                                                                                                                                                                                                                                                                                                                                                                                                                                                                                                                                                                                                                                                                                                                                                                                                                                                                                                                                                                                                                                                                                                                                                                                                                                                                                                                                                                                                                                                                                                                                   | MW and dimensions                                                                                                                                                                                                                                                                                                                                                                                                                                                                                                        |
|----------------------------------------------------------------------------------------------------------------------------------------------------------------------------------------------------------------------------------------------------------------------------------------------------------------------------------------------------------------------------------------------------------------------------------------------------------------------------------------------------------------------------------------------------------------------------------------------------------------------------------------------------------------------------------------------------------------------------------------------------------------------------------------------------------------------------------------------------------------------------------------------------------------------------------------------------------------------------------------------------------------------------------------------------------------------------------------------------------------------------------------------------------------------------------------------------------------------------------------------------------------------------------------------------------------------------------------------------------------------------------------------------------------------------------------------------------------------------------------------------------------------------------------------------------------------------------------------------------------------------------------------------------------------------------------------------------------------------|--------------------------------------------------------------------------------------------------------------------------------------------------------------------------------------------------------------------------------------------------------------------------------------------------------------------------------------------------------------------------------------------------------------------------------------------------------------------------------------------------------------------------|
| <p><b>Cox8-AcGFP1</b><br/> <b>MSVLTPLLLRGLTGSARRLPVPRAK</b>IHSLPPHPAFLYKVVDDPPV<b>MVSKGAELFTGIVPIL</b><br/>                     ELNGDVNGHKFSVSGEGGDATYGKLTLLKFICTTGKLPVPWPTLVTTLSYGVCFSRYPD<br/>                     HMKQHDFFKSAMPEGYIQERTIFFEDDGNYSRAEVKFEEDTLVNRIELTGDFKEDGNI<br/>                     LGNKMEYNYNAHNVIYIMTDKAKNGIKVNFKIRHNIEDGSVQLADHYQONTPIGDGPVLL<br/>                     PDNHYLSTQSALS KDPNEKRDMHYFGFVTA AAI THGMDELYK</p>                                                                                                                                                                                                                                                                                                                                                                                                                                                                                                                                                                                                                                                                                                                                                                                                                                                                                                                                                                                                                                                                                                                                                                                                                                                                           | <p><b>MTS</b> = 2.703 kDa<br/> <b>Linker</b> = 2.241 kDa<br/> <b>AcGFP1</b> = 26.874 kDa<br/> <b>Total protein (+MTS)</b> = 31.818 kDa<br/> <b>Total protein (-MTS)</b> = 29.115 kDa</p>                                                                                                                                                                                                                                                                                                                                 |
| <p><b>Cox8-AcGFP1<sup>2</sup></b><br/> <b>MSVLTPLLLRGLTGSARRLPVPRAK</b>IHSLPPHPAFLYKVVDDPPV<b>MVSKGAELFTGIVPIL</b><br/>                     ELNGDVNGHKFSVSGEGGDATYGKLTLLKFICTTGKLPVPWPTLVTTLSYGVCFSRYPD<br/>                     HMKQHDFFKSAMPEGYIQERTIFFEDDGNYSRAEVKFEEDTLVNRIELTGDFKEDGNI<br/>                     LGNKMEYNYNAHNVIYIMTDKAKNGIKVNFKIRHNIEDGSVQLADHYQONTPIGDGPVLL<br/>                     PDNHYLSTQSALS KDPNEKRDMHYFGFVTA AAI THGMDELYK<b>HPAFLYKVVDDPPV</b><b>M</b><br/>                     VSKGAELFTGIVPILIELNGDVNGHKFSVSGEGGDATYGKLTLLKFICTTGKLPVPWPTLV<br/>                     TTLSYGVCFSRYPDHMKQHDFFKSAMPEGYIQERTIFFEDDGNYSRAEVKFEEDTLV<br/>                     NRIELTGDFKEDGNI LGNKMEYNYNAHNVIYIMTDKAKNGIKVNFKIRHNIEDGSVQLA<br/>                     DHYQONTPIGDGPVLLPDNHYLSTQSALS KDPNEKRDMHYFGFVTA AAI THGMDELYK</p>                                                                                                                                                                                                                                                                                                                                                                                                                                                                                                                                                                                                                                                                                                                                                                                                                                                                           | <p><b>MTS</b> = 2.703 kDa<br/> <b>Linker</b> = 2.241 kDa<br/> <b>AcGFP1</b> = 26.874 kDa<br/> <b>Linker</b> = 14AA = 50.4 Å = 1.597 kDa<br/> <b>AcGFP1</b> = 26.874 kDa<br/> <b>Total protein (+MTS)</b> = 60.289 kDa<br/> <b>Total protein (-MTS)</b> = 57.586 kDa</p>                                                                                                                                                                                                                                                  |
| <p><b>Cox8-AcGFP1<sup>3</sup></b><br/> <b>MSVLTPLLLRGLTGSARRLPVPRAK</b>IHSLPPHPAFLYKVVDDPPV<b>SIKLLAMVSKGAELFT</b><br/>                     GIVPILIELNGDVNGHKFSVSGEGGDATYGKLTLLKFICTTGKLPVPWPTLVTTLSYGVC<br/>                     FSRYPDHMKQHDFFKSAMPEGYIQERTIFFEDDGNYSRAEVKFEEDTLVNRIELTGDF<br/>                     KEDGNILGNKMEYNYNAHNVIYIMTDKAKNGIKVNFKIRHNIEDGSVQLADHYQONTPIG<br/>                     DGPVLLPDNHYLSTQSALS KDPNEKRDMHYFGFVTA AAI THGMDELYK<b>DIPHPAFLYK</b><br/> <b>VVDDPPV</b><b>MVSKGAELFTGIVPIL</b>IELNGDVNGHKFSVSGEGGDATYGKLTLLKFICTTGK<br/>                     LPVPWPTLVTTLSYGVCFSRYPDHMKQHDFFKSAMPEGYIQERTIFFEDDGNYSRAEV<br/>                     KFEEDTLVNRIELTGDFKEDGNI LGNKMEYNYNAHNVIYIMTDKAKNGIKVNFKIRHNIE<br/>                     DGSVQLADHYQONTPIGDGPVLLPDNHYLSTQSALS KDPNEKRDMHYFGFVTA AAI TH<br/>                     GMDELYK<b>HPAFLYKVVDDPPVSTCIPV</b><b>MVSKGAELFTGIVPIL</b>IELNGDVNGHKFSVSGE<br/>                     GEGDATYGKLTLLKFICTTGKLPVPWPTLVTTLSYGVCFSRYPDHMKQHDFFKSAMPE<br/>                     GYIQERTIFFEDDGNYSRAEVKFEEDTLVNRIELTGDFKEDGNI LGNKMEYNYNAHNVI<br/>                     YIMTDKAKNGIKVNFKIRHNIEDGSVQLADHYQONTPIGDGPVLLPDNHYLSTQSALS KDP<br/>                     NEKRDMHYFGFVTA AAI THGMDELYK</p>                                                                                                                                                                                                                                                                                                                                                                                                                                                         | <p><b>MTS</b> = 2.703 kDa<br/> <b>Linker</b> = 2.867 kDa<br/> <b>AcGFP1</b> = 26.874 kDa<br/> <b>Linker</b> = 18AA = 64.8 Å = 2.019 kDa<br/> <b>AcGFP1</b> = 26.874 kDa<br/> <b>Linker</b> = 20AA = 72.0 Å = 2.197 kDa<br/> <b>AcGFP1</b> = 26.874 kDa<br/> <b>Total protein (+MTS)</b> = 90.408 kDa<br/> <b>Total protein (-MTS)</b> = 87.705 kDa</p>                                                                                                                                                                   |
| <p><b>Cox8<sup>2</sup>-AcGFP1<sup>4</sup></b><br/> <b>MSVLTPLLLRGLTGSARRLPVPRAK</b>IHSLGDP<b>MSVLTPLLLRGLTGSARRLPVPRAK</b>IHSL<br/>                     PPEGDLKPV<b>MVSKGAELFTGIVPIL</b>IELNGDVNGHKFSVSGEGGDATYGKLTLLKFICTTG<br/>                     KLPVPWPTLVTTLSYGVCFSRYPDHMKQHDFFKSAMPEGYIQERTIFFEDDGNYSRAE<br/>                     VKFEEDTLVNRIELTGDFKEDGNI LGNKMEYNYNAHNVIYIMTDKAKNGIKVNFKIRHN<br/>                     IEDGSVQLADHYQONTPIGDGPVLLPDNHYLSTQSALS KDPNEKRDMHYFGFVTA AAI T<br/>                     HGMDLYK<b>HPAFLYKVVDDPPVSIKLLA</b><b>MVSKGAELFTGIVPIL</b>IELNGDVNGHKFSVSG<br/>                     EGGDATYGKLTLLKFICTTGKLPVPWPTLVTTLSYGVCFSRYPDHMKQHDFFKSAMPE<br/>                     GYIQERTIFFEDDGNYSRAEVKFEEDTLVNRIELTGDFKEDGNI LGNKMEYNYNAHNVI<br/>                     YIMTDKAKNGIKVNFKIRHNIEDGSVQLADHYQONTPIGDGPVLLPDNHYLSTQSALS KDP<br/>                     NEKRDMHYFGFVTA AAI THGMDELYK<b>DIPHPAFLYKVVDDPPV</b><b>MVSKGAELFTGIVP</b><br/>                     ILIELNGDVNGHKFSVSGEGGDATYGKLTLLKFICTTGKLPVPWPTLVTTLSYGVCFSRY<br/>                     PDHMKQHDFFKSAMPEGYIQERTIFFEDDGNYSRAEVKFEEDTLVNRIELTGDFKEDG<br/>                     NILGNKMEYNYNAHNVIYIMTDKAKNGIKVNFKIRHNIEDGSVQLADHYQONTPIGDGPV<br/>                     LLPDNHYLSTQSALS KDPNEKRDMHYFGFVTA AAI THGMDELYK<b>HPAFLYKVVDDPPV</b><br/> <b>STCIPV</b><b>MVSKGAELFTGIVPIL</b>IELNGDVNGHKFSVSGEGGDATYGKLTLLKFICTTGKLP<br/>                     VPWPTLVTTLSYGVCFSRYPDHMKQHDFFKSAMPEGYIQERTIFFEDDGNYSRAEVK<br/>                     FEEDTLVNRIELTGDFKEDGNI LGNKMEYNYNAHNVIYIMTDKAKNGIKVNFKIRHNIE<br/>                     DGSVQLADHYQONTPIGDGPVLLPDNHYLSTQSALS KDPNEKRDMHYFGFVTA AAI THG<br/>                     MDELYK</p> | <p><b>MTS</b> = 2.703 kDa<br/> <b>Linker</b> = 0.738 kDa<br/> <b>MTS</b> = 2.703 kDa<br/> <b>Linker</b> = 1.401 kDa<br/> <b>AcGFP1</b> = 26.874 kDa<br/> <b>Linker</b> = 20AA = 72.0 Å = 2.223 kDa<br/> <b>AcGFP1</b> = 26.874 kDa<br/> <b>Linker</b> = 18AA = 64.8 Å = 2.019 kDa<br/> <b>AcGFP1</b> = 26.874 kDa<br/> <b>Linker</b> = 20AA = 72.0 Å = 2.198 kDa<br/> <b>AcGFP1</b> = 26.874 kDa<br/> <b>Total protein (+MTS-linker-MTS)</b> = 121.481 kDa<br/> <b>Total protein (-MTS-linker-MTS)</b> = 115.337 kDa</p> |

**Remarks:** **Mitochondrial Target Sequence (MTS)**, the 25-residue Cox8 sequence (Rizzutto *et al.*, *J. Biol. Chem.*, 1989). **Linker sequences**, **Linker sequences**, **AcGFP1 sequence** (monomeric *Aequorea coerulea* Green Fluorescent Protein). The linkers highlighted in black were not considered for geometry calculations of the proteins. Molecular weight was calculated directly from the protein sequence using the pI/Mw tool ([web.expasy.org/compute\\_pi](http://web.expasy.org/compute_pi)). One (1) Dalton (Da) equals 1 g/mol.

**Appendix Supplementary Table S2: Experimental  $D_{\text{solvent}}$  values in aqueous solution and in the cell**

| Protein/molecule                                                                                                                                                           | MW (kDa) | LOG10 (MW) | $D_{\text{solvent}}$ ( $\mu\text{m}^2/\text{s}$ ) | LOG10 ( $D_{\text{solvent}}$ ) | Reference                         |
|----------------------------------------------------------------------------------------------------------------------------------------------------------------------------|----------|------------|---------------------------------------------------|--------------------------------|-----------------------------------|
| <b>GLOBULAR OR SPHERICAL CONFORMATION IN AQUEOUS SOLUTION</b>                                                                                                              |          |            |                                                   |                                |                                   |
| Fitting results of LOG(MW) vs. LOG( $D_{\text{solvent}}$ ): $Y=A+B \cdot X$ ; $R=-0.986$ ; $p<0.0001$ ; $A=2.45 \pm 0.0154(\text{SE})$ ; $B=-0.360 \pm 0.00525(\text{SE})$ |          |            |                                                   |                                |                                   |
| Insulin                                                                                                                                                                    | 12       | 1.079      | 147.0                                             | 2.167                          | Gribbon <i>et al.</i> , 1998      |
| Cytochrome- <i>c</i>                                                                                                                                                       | 13       | 1.126      | 114.0                                             | 2.057                          | Young <i>et al.</i> , 1980        |
| Ribonuclease                                                                                                                                                               | 13       | 1.102      | 131.0                                             | 2.117                          | Tyn & Gusek, 1990                 |
| Alpha-lactalbumin                                                                                                                                                          | 13       | 1.124      | 106.0                                             | 2.025                          | Tyn & Gusek, 1990                 |
| Ribonuclease                                                                                                                                                               | 14       | 1.137      | 117.0                                             | 2.068                          | Tyn & Gusek, 1990                 |
| Lysozyme                                                                                                                                                                   | 14       | 1.144      | 112.0                                             | 2.049                          | Tyn & Gusek, 1990                 |
| Myoglobin                                                                                                                                                                  | 16       | 1.204      | 113.0                                             | 2.053                          | Tyn & Gusek, 1990                 |
| Ribonuclease                                                                                                                                                               | 17       | 1.230      | 102.0                                             | 2.009                          | Tyn & Gusek, 1990                 |
| Myokinase                                                                                                                                                                  | 21       | 1.322      | 160.0                                             | 2.204                          | Arrio-Dupont <i>et al.</i> , 2000 |
| Alpha-chymotrypsin (monomer)                                                                                                                                               | 21       | 1.328      | 102.0                                             | 2.009                          | Young <i>et al.</i> , 1980        |
| Alpha-chymotrypsinogen                                                                                                                                                     | 38       | 1.580      | 79.0                                              | 1.898                          | He & Niemeyer, 2003               |
| Gamma-chymotrypsin                                                                                                                                                         | 23       | 1.366      | 95.0                                              | 1.978                          | Tyn & Gusek, 1990                 |
| Chymotrypsin A                                                                                                                                                             | 18       | 1.243      | 102.0                                             | 2.009                          | Tyn & Gusek, 1990                 |
| SBTI                                                                                                                                                                       | 22       | 1.334      | 88.0                                              | 1.944                          | Gribbon <i>et al.</i> , 1998      |
| Ribosome 4S                                                                                                                                                                | 23       | 1.365      | 75.8                                              | 1.880                          | Tyn & Gusek, 1990                 |
| Beta-casein                                                                                                                                                                | 24       | 1.382      | 60.5                                              | 1.782                          | Tyn & Gusek, 1990                 |
| Riboflavin-binding protein                                                                                                                                                 | 33       | 1.512      | 74.0                                              | 1.869                          | Tyn & Gusek, 1990                 |
| Pepsin                                                                                                                                                                     | 33       | 1.515      | 87.0                                              | 1.940                          | Tyn & Gusek, 1990                 |
| Beta-lactoglobulin                                                                                                                                                         | 35       | 1.549      | 78.0                                              | 1.892                          | Tyn & Gusek, 1990                 |
| Ovalbumin                                                                                                                                                                  | 44       | 1.643      | 77.6                                              | 1.890                          | Tyn & Gusek, 1990                 |
| Phosphoglucomutase                                                                                                                                                         | 60       | 1.778      | 63.8                                              | 1.805                          | Arrio-Dupont <i>et al.</i> , 2000 |
| Phosphoglycerate kinase                                                                                                                                                    | 47       | 1.670      | 63.8                                              | 1.805                          | Tyn & Gusek, 1990                 |
| Hemoglobin                                                                                                                                                                 | 63       | 1.799      | 69.0                                              | 1.839                          | Tyn & Gusek, 1990                 |
| Hemoglobin - earthworm                                                                                                                                                     | 3700     | 3.568      | 12.0                                              | 1.079                          | Papadopoulos <i>et al.</i> , 2000 |
| Bovine serum albumin                                                                                                                                                       | 65       | 1.816      | 61.5                                              | 1.789                          | Tyn & Gusek, 1990                 |
| Beta-enolase                                                                                                                                                               | 90       | 1.954      | 56.0                                              | 1.748                          | Arrio-Dupont <i>et al.</i> , 2000 |
| Alpha-amylase                                                                                                                                                              | 97       | 1.986      | 57.2                                              | 1.757                          | Young <i>et al.</i> , 1980        |
| Citrate synthase                                                                                                                                                           | 98       | 1.991      | 58.0                                              | 1.763                          | Durchslag & Zipper, 1997          |
| Hexokinase                                                                                                                                                                 | 99       | 1.996      | 60.0                                              | 1.778                          | Tyn & Gusek, 1990                 |
| Glyceraldehyde-3-phosphate dehydrogenase                                                                                                                                   | 141      | 2.149      | 50.0                                              | 1.699                          | Tyn & Gusek, 1990                 |

|                              |     |       |      |       |                                                  |
|------------------------------|-----|-------|------|-------|--------------------------------------------------|
| Lysine-trna ligase           | 138 | 2.140 | 43.0 | 1.633 | <a href="#">Tyn &amp; Gusek, 1990</a>            |
| Lactate dehydrogenase        | 138 | 2.141 | 51.0 | 1.708 | <a href="#">Tyn &amp; Gusek, 1990</a>            |
| Phosphofructokinase          | 142 | 2.152 | 53.0 | 1.724 | <a href="#">Tyn &amp; Gusek, 1990</a>            |
| Phosphofructokinase          | 160 | 2.204 | 42.0 | 1.623 | <a href="#">Tyn &amp; Gusek, 1990</a>            |
| IgG                          | 160 | 2.204 | 40.5 | 1.607 | <a href="#">Arrio-Dupont <i>et al.</i>, 2000</a> |
| Phosphofructokinase          | 320 | 2.505 | 32.2 | 1.508 | <a href="#">Tyn &amp; Gusek, 1990</a>            |
| Beta-lactoglobulin A         | 147 | 2.167 | 42.0 | 1.623 | <a href="#">Tyn &amp; Gusek, 1990</a>            |
| Gamma-globulin               | 153 | 2.185 | 40.0 | 1.602 | <a href="#">Tyn &amp; Gusek, 1990</a>            |
| Gamma-globulin               | 162 | 2.210 | 37.0 | 1.568 | <a href="#">Tyn &amp; Gusek, 1990</a>            |
| Glycogen-phosphorylase       | 163 | 2.212 | 42.0 | 1.623 | <a href="#">Tyn &amp; Gusek, 1990</a>            |
| Glycogen-phosphorylase       | 185 | 2.267 | 41.2 | 1.615 | <a href="#">Tyn &amp; Gusek, 1990</a>            |
| Malate synthase              | 170 | 2.230 | 45.0 | 1.653 | <a href="#">Tyn &amp; Gusek, 1990</a>            |
| Malate synthase              | 187 | 2.272 | 45.0 | 1.653 | <a href="#">Tyn &amp; Gusek, 1990</a>            |
| Methionyl-tRNA synthetase    | 173 | 2.238 | 35.0 | 1.544 | <a href="#">Tyn &amp; Gusek, 1990</a>            |
| Pyruvate kinase              | 191 | 2.281 | 42.0 | 1.623 | <a href="#">Tyn &amp; Gusek, 1990</a>            |
| Catalase                     | 225 | 2.352 | 41.0 | 1.613 | <a href="#">Tyn &amp; Gusek, 1990</a>            |
| Catalase                     | 232 | 2.365 | 41.0 | 1.613 | <a href="#">Tyn &amp; Gusek, 1990</a>            |
| Catalase                     | 248 | 2.394 | 43.0 | 1.633 | <a href="#">Papadopoulos <i>et al.</i>, 2000</a> |
| Catalase                     | 250 | 2.398 | 45.0 | 1.653 | <a href="#">Tyn &amp; Gusek, 1990</a>            |
| Porphobilinogen synthase     | 270 | 2.431 | 42.0 | 1.623 | <a href="#">Tyn &amp; Gusek, 1990</a>            |
| Porphobilinogen synthase     | 240 | 2.380 | 42.0 | 1.623 | <a href="#">Tyn &amp; Gusek, 1990</a>            |
| Glutamate dehydrogenase      | 270 | 2.431 | 35.0 | 1.544 | <a href="#">Tyn &amp; Gusek, 1990</a>            |
| Glutamate dehydrogenase      | 312 | 2.494 | 35.0 | 1.544 | <a href="#">Tyn &amp; Gusek, 1990</a>            |
| Glutamate dehydrogenase      | 343 | 2.535 | 35.0 | 1.544 | <a href="#">Tyn &amp; Gusek, 1990</a>            |
| Edestin                      | 310 | 2.491 | 39.3 | 1.594 | <a href="#">Tyn &amp; Gusek, 1990</a>            |
| Edestin                      | 324 | 2.511 | 31.7 | 1.501 | <a href="#">Tyn &amp; Gusek, 1990</a>            |
| Adenovirus Type 2 hexon      | 323 | 2.509 | 35.6 | 1.551 | <a href="#">Tyn &amp; Gusek, 1990</a>            |
| Adenovirus Type 2 hexon      | 355 | 2.550 | 33.2 | 1.521 | <a href="#">Tyn &amp; Gusek, 1990</a>            |
| Phosphofructokinase          | 330 | 2.519 | 36.0 | 1.556 | <a href="#">Tyn &amp; Gusek, 1990</a>            |
| Phosphofructokinase          | 340 | 2.531 | 32.2 | 1.508 | <a href="#">Tyn &amp; Gusek, 1990</a>            |
| DNA-dependent RNA+polymerase | 360 | 2.556 | 33.0 | 1.519 | <a href="#">Tyn &amp; Gusek, 1990</a>            |
| Glycogen phosphorylase       | 370 | 2.568 | 33.0 | 1.519 | <a href="#">Tyn &amp; Gusek, 1990</a>            |
| Cytochrome c1                | 371 | 2.569 | 33.1 | 1.520 | <a href="#">Young <i>et al.</i>, 1980</a>        |
| Ferritin                     | 450 | 2.653 | 38.0 | 1.580 | <a href="#">Papadopoulos <i>et al.</i>, 2000</a> |
| Apo ferritin                 | 441 | 2.644 | 36.1 | 1.558 | <a href="#">Tyn &amp; Gusek, 1990</a>            |
| Apo ferritin                 | 460 | 2.663 | 36.1 | 1.558 | <a href="#">Tyn &amp; Gusek, 1990</a>            |



|                                    |      |       |      |       |                                                  |
|------------------------------------|------|-------|------|-------|--------------------------------------------------|
| Apo ferritin                       | 467  | 2.669 | 36.1 | 1.558 | <a href="#">Tyn &amp; Gusek, 1990</a>            |
| Fibronectin                        | 510  | 2.708 | 22.7 | 1.356 | <a href="#">Durchslag &amp; Zipper, 1997</a>     |
| Beta-galactosidase                 | 540  | 2.732 | 30.0 | 1.477 | <a href="#">Arrio-Dupont <i>et al.</i>, 2000</a> |
| Thyroglobulin                      | 630  | 2.799 | 26.5 | 1.423 | <a href="#">Tyn &amp; Gusek, 1990</a>            |
| Thyroglobulin                      | 650  | 2.813 | 26.5 | 1.423 | <a href="#">Tyn &amp; Gusek, 1990</a>            |
| Thyroglobulin                      | 660  | 2.820 | 26.1 | 1.417 | <a href="#">Tyn &amp; Gusek, 1990</a>            |
| Ribosome S30                       | 700  | 2.845 | 29.5 | 1.470 | <a href="#">Tyn &amp; Gusek, 1990</a>            |
| Alpha-crystallin                   | 770  | 2.886 | 23.0 | 1.362 | <a href="#">Tyn &amp; Gusek, 1990</a>            |
| Alpha-crystallin                   | 840  | 2.924 | 23.0 | 1.362 | <a href="#">Tyn &amp; Gusek, 1990</a>            |
| Alpha-crystallin                   | 960  | 2.982 | 20.0 | 1.301 | <a href="#">Tyn &amp; Gusek, 1990</a>            |
| Alpha2-macroglobulin               | 820  | 2.914 | 24.1 | 1.382 | <a href="#">Tyn &amp; Gusek, 1990</a>            |
| Alpha2-macroglobulin               | 985  | 2.993 | 24.1 | 1.382 | <a href="#">Tyn &amp; Gusek, 1990</a>            |
| Haemocyanin                        | 854  | 2.931 | 26.9 | 1.430 | <a href="#">Tyn &amp; Gusek, 1990</a>            |
| Ribosome S30                       | 870  | 2.940 | 29.5 | 1.470 | <a href="#">Tyn &amp; Gusek, 1990</a>            |
| Ribosome S30                       | 900  | 2.954 | 29.5 | 1.470 | <a href="#">Tyn &amp; Gusek, 1990</a>            |
| Beta-casein                        | 1200 | 3.079 | 14.0 | 1.146 | <a href="#">Tyn &amp; Gusek, 1990</a>            |
| Ribosome S30                       | 1000 | 3.000 | 29.5 | 1.470 | <a href="#">Tyn &amp; Gusek, 1990</a>            |
| Ribosome S50                       | 1500 | 3.176 | 19.1 | 1.281 | <a href="#">Tyn &amp; Gusek, 1990</a>            |
| Ribosome S50                       | 1550 | 3.190 | 19.1 | 1.281 | <a href="#">Tyn &amp; Gusek, 1990</a>            |
| Ribosome S50                       | 1580 | 3.199 | 19.1 | 1.281 | <a href="#">Tyn &amp; Gusek, 1990</a>            |
| Ribosome S50                       | 1800 | 3.255 | 19.1 | 1.281 | <a href="#">Tyn &amp; Gusek, 1990</a>            |
| Ribosome S70                       | 3000 | 3.477 | 18.3 | 1.262 | <a href="#">Tyn &amp; Gusek, 1990</a>            |
| Fatty-acid synthase                | 2200 | 3.342 | 17.8 | 1.250 | <a href="#">Tyn &amp; Gusek, 1990</a>            |
| Fatty-acid synthase                | 2300 | 3.362 | 17.0 | 1.230 | <a href="#">Tyn &amp; Gusek, 1990</a>            |
| Pyruvate dehydrogenase             | 3780 | 3.577 | 12.0 | 1.079 | <a href="#">Tyn &amp; Gusek, 1990</a>            |
| Pyruvate dehydrogenase             | 4800 | 3.681 | 12.0 | 1.079 | <a href="#">Tyn &amp; Gusek, 1990</a>            |
| Satellite tobacco necrosis virus   | 9000 | 3.954 | 10.7 | 1.029 | <a href="#">Tyn &amp; Gusek, 1990</a>            |
| Satellite tobacco necrosis virus   | 1700 | 3.230 | 20.4 | 1.310 | <a href="#">Tyn &amp; Gusek, 1990</a>            |
| Turnip yellow mosaic virus         | 1970 | 3.294 | 20.4 | 1.310 | <a href="#">Tyn &amp; Gusek, 1990</a>            |
| Turnip yellow mosaic virus         | 3013 | 3.479 | 15.1 | 1.179 | <a href="#">Tyn &amp; Gusek, 1990</a>            |
| Turnip yellow mosaic virus         | 3100 | 3.491 | 15.1 | 1.179 | <a href="#">Tyn &amp; Gusek, 1990</a>            |
| Alfalfa mosaic virus (top)         | 3500 | 3.544 | 15.1 | 1.179 | <a href="#">Tyn &amp; Gusek, 1990</a>            |
| Bacteriophage MS2 (native protein) | 3770 | 3.576 | 15.5 | 1.190 | <a href="#">Tyn &amp; Gusek, 1990</a>            |
| Bacteriophage fr                   | 3600 | 3.556 | 16.0 | 1.204 | <a href="#">Durchslag &amp; Zipper, 1997</a>     |
| Bacteriophage virus R17            | 3620 | 3.559 | 14.0 | 1.146 | <a href="#">Tyn &amp; Gusek, 1990</a>            |
| Bacteriophage virus R17            | 3600 | 3.556 | 13.3 | 1.123 | <a href="#">Tyn &amp; Gusek, 1990</a>            |

|                                                                                                                                         |       |       |      |       |                          |
|-----------------------------------------------------------------------------------------------------------------------------------------|-------|-------|------|-------|--------------------------|
| Bacteriophage virus R17                                                                                                                 | 3700  | 3.568 | 13.3 | 1.123 | Tyn & Gusek, 1990        |
| Wild cucumber mosaic virus top a                                                                                                        | 4190  | 3.622 | 13.3 | 1.123 | Tyn & Gusek, 1990        |
| Wild cucumber mosaic virus top b                                                                                                        | 4000  | 3.602 | 12.9 | 1.111 | Tyn & Gusek, 1990        |
| Wild cucumber mosaic virus top b                                                                                                        | 4300  | 3.633 | 12.9 | 1.111 | Tyn & Gusek, 1990        |
| Bromegrass mosaic virus                                                                                                                 | 4400  | 3.643 | 12.9 | 1.111 | Tyn & Gusek, 1990        |
| Bromegrass mosaic virus                                                                                                                 | 4400  | 3.643 | 15.5 | 1.190 | Tyn & Gusek, 1990        |
| Bromegrass mosaic virus                                                                                                                 | 4700  | 3.672 | 15.5 | 1.190 | Tyn & Gusek, 1990        |
| Broad bean mottle virus                                                                                                                 | 5400  | 3.732 | 15.5 | 1.190 | Tyn & Gusek, 1990        |
| Broad bean mottle virus                                                                                                                 | 4750  | 3.677 | 14.4 | 1.158 | Tyn & Gusek, 1990        |
| Broad bean mottle virus                                                                                                                 | 4850  | 3.686 | 14.4 | 1.158 | Tyn & Gusek, 1990        |
| Broad bean mottle virus                                                                                                                 | 5000  | 3.699 | 14.4 | 1.158 | Tyn & Gusek, 1990        |
| Broad bean mottle virus                                                                                                                 | 5200  | 3.716 | 13.8 | 1.140 | Tyn & Gusek, 1990        |
| Turnip yellow mosaic virus                                                                                                              | 5600  | 3.748 | 14.4 | 1.158 | Tyn & Gusek, 1990        |
| Turnip yellow mosaic virus                                                                                                              | 4970  | 3.696 | 15.5 | 1.190 | Tyn & Gusek, 1990        |
| Turnip yellow mosaic virus                                                                                                              | 5000  | 3.699 | 15.5 | 1.190 | Tyn & Gusek, 1990        |
| Tobacco necrosis virus                                                                                                                  | 5530  | 3.743 | 15.5 | 1.190 | Tyn & Gusek, 1990        |
| Tobacco necrosis virus                                                                                                                  | 6000  | 3.778 | 15.3 | 1.185 | Tyn & Gusek, 1990        |
| Southern bean mosaic virus                                                                                                              | 7400  | 3.869 | 14.0 | 1.146 | Tyn & Gusek, 1990        |
| Southern bean mosaic virus                                                                                                              | 6600  | 3.820 | 13.9 | 1.143 | Tyn & Gusek, 1990        |
| Southern bean mosaic virus                                                                                                              | 6602  | 3.820 | 13.9 | 1.143 | Tyn & Gusek, 1990        |
| Southern bean mosaic virus                                                                                                              | 6630  | 3.822 | 13.4 | 1.127 | Durchslag & Zipper, 1997 |
| Alfalfa mosaic virus (bottom)                                                                                                           | 6690  | 3.825 | 13.9 | 1.143 | Tyn & Gusek, 1990        |
| Alfalfa mosaic virus (bottom)                                                                                                           | 6820  | 3.834 | 11.3 | 1.053 | Tyn & Gusek, 1990        |
| Alfalfa mosaic virus (bottom)                                                                                                           | 6860  | 3.836 | 11.3 | 1.053 | Tyn & Gusek, 1990        |
| Alfalfa mosaic virus (bottom)                                                                                                           | 6920  | 3.840 | 10.5 | 1.021 | Tyn & Gusek, 1990        |
| Tobacco bushy stunt virus                                                                                                               | 7400  | 3.869 | 10.5 | 1.021 | Tyn & Gusek, 1990        |
| Bacteriophage lambda (enlarged prehead)                                                                                                 | 10700 | 4.029 | 11.5 | 1.061 | Tyn & Gusek, 1990        |
| Bacteriophage lambda (processed prehead)                                                                                                | 17000 | 4.230 | 6.9  | 0.839 | Tyn & Gusek, 1990        |
| Bacteriophage lambda (empty head)                                                                                                       | 18000 | 4.255 | 7.8  | 0.892 | Tyn & Gusek, 1990        |
| Bacteriophage lambda (unprocessed head)                                                                                                 | 21000 | 4.322 | 6.4  | 0.806 | Tyn & Gusek, 1990        |
| Bacteriophage lambda (full head)                                                                                                        | 22000 | 4.342 | 7.6  | 0.881 | Tyn & Gusek, 1990        |
| Lipid-containing bacteriophage                                                                                                          | 56000 | 4.748 | 6.5  | 0.813 | Tyn & Gusek, 1990        |
| Rice dwarf virus                                                                                                                        | 45000 | 4.653 | 5.5  | 0.740 | Durchslag & Zipper, 1997 |
| <b>ELONGATED, FIBROUS STRUCTURE OR ROD-LIKE CONFORMATION IN AQUEOUS SOLUTION</b>                                                        |       |       |      |       |                          |
| Fitting results of LOG(MW) vs. LOG(D <sub>solvent</sub> ): $Y=A+B \cdot X$ ; R=-0.990; p<0.0001; A=3.06±0.0542(SE); B=-0.715±0.0173(SE) |       |       |      |       |                          |

|                             |        |       |       |        |                                   |
|-----------------------------|--------|-------|-------|--------|-----------------------------------|
| Flagellin                   | 42     | 1.620 | 54.0  | 1.732  | Tyn & Gusek, 1990                 |
| Meromyosin                  | 120    | 2.079 | 22.5  | 1.352  | Tyn & Gusek, 1990                 |
| Fibrinogen                  | 340    | 2.531 | 20.2  | 1.305  | Tyn & Gusek, 1990                 |
| Myosin                      | 493    | 2.693 | 11.6  | 1.064  | Tyn & Gusek, 1990                 |
| Myosin                      | 570    | 2.756 | 10.0  | 1.000  | Tyn & Gusek, 1990                 |
| Myosin                      | 594    | 2.774 | 8.7   | 0.940  | Tyn & Gusek, 1990                 |
| RNA of tobacco mosaic virus | 2150   | 3.332 | 7.0   | 0.843  | Tyn & Gusek, 1990                 |
| DNA                         | 4000   | 3.602 | 1.3   | 0.114  | Tyn & Gusek, 1990                 |
| DNA                         | 5000   | 3.699 | 1.3   | 0.114  | Tyn & Gusek, 1990                 |
| DNA                         | 6000   | 3.778 | 1.3   | 0.114  | Tyn & Gusek, 1990                 |
| p1868                       | 1232   | 3.091 | 7.0   | 0.845  | Prazeres, 2008                    |
| PLN1                        | 1386   | 3.142 | 6.0   | 0.778  | Prazeres, 2008                    |
| Not available               | 1525   | 3.183 | 5.6   | 0.748  | Prazeres, 2008                    |
| PK3A108                     | 1535   | 3.186 | 5.4   | 0.728  | Prazeres, 2008                    |
| pUC18                       | 1773   | 3.249 | 5.4   | 0.732  | Prazeres, 2008                    |
| pUC8                        | 1793   | 3.254 | 4.9   | 0.690  | Prazeres, 2008                    |
| pUC18-3A108                 | 1847   | 3.266 | 4.8   | 0.681  | Prazeres, 2008                    |
| pGem1a                      | 2462   | 3.391 | 4.1   | 0.614  | Prazeres, 2008                    |
| pBR322                      | 2880   | 3.459 | 3.7   | 0.568  | Prazeres, 2008                    |
| p30delta                    | 3136   | 3.496 | 3.5   | 0.545  | Prazeres, 2008                    |
| pACL29                      | 3564   | 3.552 | 3.1   | 0.491  | Prazeres, 2008                    |
| ColE1                       | 4290   | 3.632 | 2.9   | 0.461  | Prazeres, 2008                    |
| pDR1996                     | 6732   | 3.828 | 2.3   | 0.362  | Prazeres, 2008                    |
| pPIC9K<TRL5>                | 7326   | 3.865 | 1.7   | 0.217  | Prazeres, 2008                    |
| pCC1FOS™45                  | 29700  | 4.473 | 0.6   | -0.222 | Prazeres, 2008                    |
| CTD-2342K16                 | 74448  | 4.872 | 0.5   | -0.310 | Prazeres, 2008                    |
| CTD-2609C22                 | 121110 | 5.083 | 0.3   | -0.481 | Prazeres, 2008                    |
| CTD-2657L24                 | 189486 | 5.278 | 0.2   | -0.638 | Prazeres, 2008                    |
| EGFP1                       | 30     | 1.477 | 104.0 | 2.017  | Pack <i>et al.</i> , 2006         |
| EGFP1                       | 27     | 1.431 | 87.0  | 1.940  | Arrio-Dupont <i>et al.</i> , 2000 |
| EGFP2                       | 60     | 1.778 | 71.8  | 1.856  | Pack <i>et al.</i> , 2006         |
| EGFP3                       | 90     | 1.954 | 61.3  | 1.787  | Pack <i>et al.</i> , 2006         |
| EGFP4                       | 120    | 2.079 | 48.7  | 1.688  | Pack <i>et al.</i> , 2006         |
| EGFP5                       | 150    | 2.176 | 45.2  | 1.655  | Pack <i>et al.</i> , 2006         |
| EGFP1                       | 27     | 1.430 | 97.3  | 1.988  | Vámosi <i>et al.</i> , 2016       |
| EGFP2                       | 54     | 1.735 | 98.8  | 1.995  | Vámosi <i>et al.</i> , 2016       |

|                                                                                                                                          |     |       |      |       |                             |
|------------------------------------------------------------------------------------------------------------------------------------------|-----|-------|------|-------|-----------------------------|
| EGFP3                                                                                                                                    | 82  | 1.912 | 60.2 | 1.780 | Vámosi <i>et al.</i> , 2016 |
| EGFP4                                                                                                                                    | 109 | 2.038 | 54.8 | 1.739 | Vámosi <i>et al.</i> , 2016 |
| <b>ELONGATED, FIBROUS STRUCTURE OR ROD-LIKE MOLECULES IN THE NUCLEUS OF HeLa CELLS</b>                                                   |     |       |      |       |                             |
| Fitting results of LOG(MW) vs. LOG(D <sub>solvent</sub> ): $Y=A+B \cdot X$ ; R=-0.926; P=3.42E-4; A=2.72±0.214(SE); B=-0.748±0.115(SE)   |     |       |      |       |                             |
| EGFP1 - nucleus HeLa                                                                                                                     | 30  | 1.477 | 32.3 | 1.510 | Pack <i>et al.</i> , 2006   |
| EGFP2 - nucleus HeLa                                                                                                                     | 60  | 1.778 | 21.2 | 1.327 | Pack <i>et al.</i> , 2006   |
| EGFP3 - nucleus HeLa                                                                                                                     | 90  | 1.954 | 16.5 | 1.218 | Pack <i>et al.</i> , 2006   |
| EGFP4 - nucleus HeLa                                                                                                                     | 120 | 2.079 | 12.3 | 1.088 | Pack <i>et al.</i> , 2006   |
| EGFP5 - nucleus HeLa                                                                                                                     | 150 | 2.176 | 11.1 | 1.046 | Pack <i>et al.</i> , 2006   |
| EGFP1 - nucleus HEK293, HeLa, TP366, T98G                                                                                                | 27  | 1.431 | 50.6 | 1.704 | Dross <i>et al.</i> , 2009  |
| EGFP2 - nucleus HEK293, HeLa, TP366, T98G                                                                                                | 54  | 1.732 | 31.0 | 1.491 | Dross <i>et al.</i> , 2009  |
| EGFP3 - nucleus HEK293, HeLa, TP366, T98G                                                                                                | 81  | 1.908 | 23.8 | 1.377 | Dross <i>et al.</i> , 2009  |
| EGFP4 - nucleus HEK293, HeLa, TP366, T98G                                                                                                | 108 | 2.033 | 20.2 | 1.305 | Dross <i>et al.</i> , 2009  |
| <b>ELONGATED, FIBROUS STRUCTURE OR ROD-LIKE MOLECULES IN THE CYTOSOL OF HeLa CELLS</b>                                                   |     |       |      |       |                             |
| Fitting results of LOG(MW) vs. LOG(D <sub>solvent</sub> ): $Y=A+B \cdot X$ ; R=-0.984; P=0.00236; A=2.53±0.131(SE); B=-0.665±0.0688(SE)  |     |       |      |       |                             |
| EGFP1 - cytosol HeLa                                                                                                                     | 30  | 1.477 | 33.3 | 1.523 | Pack <i>et al.</i> , 2006   |
| EGFP2 - cytosol HeLa                                                                                                                     | 60  | 1.778 | 23.4 | 1.369 | Pack <i>et al.</i> , 2006   |
| EGFP3 - cytosol HeLa                                                                                                                     | 90  | 1.954 | 18.7 | 1.271 | Pack <i>et al.</i> , 2006   |
| EGFP4 - cytosol HeLa                                                                                                                     | 120 | 2.079 | 12.8 | 1.108 | Pack <i>et al.</i> , 2006   |
| EGFP5 - cytosol HeLa                                                                                                                     | 150 | 2.176 | 11.8 | 1.073 | Pack <i>et al.</i> , 2006   |
| <b>AcGFP1 CONCATEMERS IN THE MITOCHONDRIA OF HeLa CELLS</b>                                                                              |     |       |      |       |                             |
| Fitting results of LOG(MW) vs. LOG(D <sub>solvent</sub> ): $Y=A+B \cdot X$ ; R=-0.997; P=0.00268; A=2.81±0.0923(SE); B=-0.976±0.0506(SE) |     |       |      |       |                             |
| AcGFP1                                                                                                                                   | 29  | 1.465 | 23.9 | 1.378 | Current study               |
| AcGFP1 <sup>2</sup>                                                                                                                      | 58  | 1.760 | 11.8 | 1.072 | Current study               |
| AcGFP1 <sup>3</sup>                                                                                                                      | 88  | 1.943 | 8.6  | 0.934 | Current study               |
| AcGFP1 <sup>4</sup>                                                                                                                      | 115 | 2.062 | 6.0  | 0.780 | Current study               |

**Remarks:** Data in red of Pack *et al.*, 2006 were corrected as proposed by Dross *et al.*, 2009 using a diffusion constant for Rhodamine 6G of 430 μm<sup>2</sup>/s (Jameson *et al.*, 2009). Data for the Tobacco mosaic virus was not included since this virus is geometrically extreme (*i.e.* it resembles a cylinder with a length/diameter ratio of 16.7; Saxton, 2014).

### Appendix Supplementary Table S3: Interpretation of the data sets in Appendix Supplementary Table S2

| Dataset                                                                          | Environment             | Techniques | Interpretation                   | References                                                                                                                                                                                                                                                                                                                                                           |
|----------------------------------------------------------------------------------|-------------------------|------------|----------------------------------|----------------------------------------------------------------------------------------------------------------------------------------------------------------------------------------------------------------------------------------------------------------------------------------------------------------------------------------------------------------------|
| <b>Globular or spherical conformation in aqueous solution</b>                    |                         |            |                                  |                                                                                                                                                                                                                                                                                                                                                                      |
| Globular                                                                         | Aqueous solution        | Various    | Globular structure               | <a href="#">Young <i>et al.</i>, 1980</a><br><a href="#">Tyn &amp; Gusek, 1990</a><br><a href="#">Durchslag &amp; Zipper, 1997</a><br><a href="#">Gribbon <i>et al.</i>, 1998</a><br><a href="#">Arrio-Dupont <i>et al.</i>, 2000</a><br><a href="#">Papadopoulos <i>et al.</i>, 2000</a><br><a href="#">He &amp; Niemeyer, 2003</a><br><a href="#">Saxton, 2014</a> |
| Virus                                                                            | Aqueous solution        | Various    | Globular structure               | <a href="#">Tyn &amp; Gusek, 1990</a><br><a href="#">Durchslag &amp; Zipper, 1997</a><br><a href="#">Saxton, 2014</a>                                                                                                                                                                                                                                                |
| <b>Elongated, fibrous structure or rod-like conformation in aqueous solution</b> |                         |            |                                  |                                                                                                                                                                                                                                                                                                                                                                      |
| Fibrous                                                                          | Aqueous solution        | Various    | Fibrous, elongated structure     | <a href="#">Tyn &amp; Gusek, 1990</a><br><a href="#">Saxton, 2014</a>                                                                                                                                                                                                                                                                                                |
| Plasmids                                                                         | Aqueous solution        | Various    | Supercoiled, elongated structure | <a href="#">Prazeres, 2008</a>                                                                                                                                                                                                                                                                                                                                       |
| (E)GFP concatemers                                                               | Aqueous solution        | FCS        | Rod-like molecules               | <a href="#">Pack <i>et al.</i>, 2006</a><br><a href="#">Vámosi <i>et al.</i>, 2016</a>                                                                                                                                                                                                                                                                               |
| <b>Elongated, fibrous structure or rod-like molecules in the cell</b>            |                         |            |                                  |                                                                                                                                                                                                                                                                                                                                                                      |
| EGFP concatemers                                                                 | Nucleus of HeLa cells   | FCS        | Rod-like molecules               | <a href="#">Pack <i>et al.</i>, 2006</a>                                                                                                                                                                                                                                                                                                                             |
| EGFP concatemers                                                                 | Cytoplasm of HeLa cells | FCS        | Rod-like molecules               | <a href="#">Pack <i>et al.</i>, 2006</a>                                                                                                                                                                                                                                                                                                                             |
| EGFP concatemers                                                                 | Nucleus of HeLa cells   | FCS        | Rod-like molecules               | <a href="#">Dross <i>et al.</i>, 2009</a>                                                                                                                                                                                                                                                                                                                            |



## **5. Appendix Supplementary References**

1. **Ajaz S**, Czajka A, Malik A (2015) Accurate measurement of circulating mitochondrial DNA content from human blood samples using real-time quantitative PCR. *Meth Mol Biol* 1264: 117-131
2. **Akabayov B**, Akabayov SR, Lee SJ, Wagner G, Richardson CC (2013) Impact of macromolecular crowding on DNA replication. *Nat Commun* 4: 1615
3. **Appelhans T**, Richter CP, Wilkens V, Hess ST, Piehler J, Busch KB (2011) Nanoscale organisation of mitochondrial microcompartments revealed by combining tracking and localization microscopy. *Nano Lett* 12: 610-616
4. **Arrio-Dupont M**, Cribier S, Foucault G, Devaux PF, d'Albis A, (1996) Diffusion of fluorescently labeled macromolecules in cultured muscle cells. *Biophys J* 70: 2327-2332
5. **Arrio-Dupont M**, Foucault G, Vacher M, Devaux PF, Cribier S (2000) Translational diffusion of globular proteins in the cytoplasm of cultured muscle cells. *Biophys J* 78: 901-907
6. **Bell P**, Vandenberghe LH, Wu D, Johnston J, Limberis M, Wilson JM (2007) A comparative analysis of novel fluorescent proteins as reporters for gene transfer studies. *J Histochem Cytochem* 55: 931-939
7. **Blässle A**, Soh G, Braun T, Mörsdorf D, Preiss H, Jordan BM, Müller P (2018) Quantitative diffusion measurements using the open-source software PyFRAP. *Nat Commun* 9: 1582
8. **Burbulla LF**, Fitzgerald JC, Stegen K, Westermeier J, Thost AK, Kato H, Mokranjac D, Sauerwald J, Martins LM, Voitalla D, *et al.* (2014) Mitochondrial proteolytic stress induced by loss of mortalin function is rescued by Parkin and PINK1. *Cell Death Dis* 5: e1180
9. **Bulina ME**, Chudakov DM, Britanova OV, Yanushevich YG, Staroverov DB, Chepurnykh TV, Merzlyak EM, Shkrob MA, Lukyanov S, Lukyanov KA (2006) A genetically encoded photosensitizer. *Nat Biotechnol* 24: 95-99
10. **Bustin SA**, Benes V, Garson JA, Hellemans J, Huggett J, Kubista M, Mueller R, Nolan T, Pfaffl MW, Shipley GL, Vandesompele J, Wittwer CT (2009) The MIQE guidelines: minimum information for publication of quantitative real-time PCR experiments. *Clin Chem* 55: 611-622.
11. **Dashevskaya S**, Kopito RB, Friedman R, Elbaum M, Epel BL (2008) Diffusion of anionic and neutral GFP derivatives through plasmodesmata in epidermal cells of *Nicotiana benthamiana*. *Protoplasma* 234: 13-23.
12. **Dieteren CEJ**, Willems PHGM, Vogel RO, Swarts HG, Franssen J, Roepman R, Crienen G, Smeitink JAM, Nijtmans LGJ, Koopman WJH (2008) Subunits of Mitochondrial Complex I Exist as part of matrix- and membrane-associated subcomplexes in living cells. *J Biol Chem* 283: 34753-34761
13. **Dieteren CEJ**, Gielen SCAM, Nijtmans LGJ, Smeitink JAM, Swarts HG, Brock R, Willems PHGM, Koopman WJH (2011) Solute diffusion is hindered in the mitochondrial matrix. *Proc Natl Acad Sci USA* 108: 8657-8662
14. **Divakaruni AS**, Jastroch M (2022) A practical guide for the analysis, standardization and interpretation of oxygen consumption measurements. *Nat Metab* 4:978-994
15. **Dross N**, Spriet C, Zwerger M, Müller G, Waldeck W, Langowski J (2009) Mapping eGFP oligomer mobility in living cell nuclei. *PLoS ONE* 4: e5041
16. **Durchschlag H**, Zipper P (1997) Prediction of hydrodynamic parameters of biopolymers from small-angle scattering data. *J Appl Cryst* 30: 1112-1124
17. **Einstein A** (1905) Über die von der molekularkinetischen Theorie der Wärme geforderte Bewegung von in ruhenden Flüssigkeiten suspendierten Teilchen. *Annalen der Physik* 322: 549-560
18. **Elachouri G**, Vidoni S, Zanna C, Pattyn A, Boukhaddaoui H, Gaget K, Yu-Wai-Man P, Gasparre G, Sarzi E, Delettre C, *et al.* (2011) OPA1 links human mitochondrial genome maintenance to mtDNA replication and distribution. *Genome Res* 21: 12-20
19. **Erbán R** (2014) From molecular dynamics to Brownian dynamics. *Proc R Soc A* 470: 20140036
20. **Goodwin JS**, Kenworthy AK (2005) Photobleaching approaches to investigate diffusional mobility and trafficking of Ras in living cells. *Methods* 37: 154-164
21. **Gribbon P**, Hardingham TE (1998) Macromolecular diffusion of biological polymers measured by confocal fluorescence recovery after photobleaching. *Biophys J* 75: 1032-1039

22. **He L**, Niemeyer B (2003) A novel correlation for protein diffusion coefficients based on molecular weight and radius of gyration. *Biotechnol Prog* 19: 544-548
23. **Houtkooper RH**, Mouchiroud L, Ryu D, Moullan N, Katsyuba E, Knott G, Williams RW, Auwerx J (2013) Mitonuclear protein imbalance as a conserved longevity mechanism. *Nature* 497: 451-459
24. **Huber GA, McCammon JA** (2019) Brownian dynamics simulations of biological molecules. *Trends Chem* 1: 727-738
25. **Hu C**, Shu L, Huang X, Yu J, Li L, Gong L, Yang M, Wu Z, Gao Z, Zhao Y, Chen L, Song Z (2020) OPA1 and MICOS regulate mitochondrial crista dynamics and formation. *Cell Death Dis* 11: 940
26. **Jameson DM**, Ross JA, Albanesi JP (2009) Fluorescence fluctuation microscopy: ushering a new age of enlightenment for cellular dynamics. *Biophys Rev* 1: 105-118
27. **Koopman WJH**, Visch HJ, Smeitink JAM, Willems PHGM (2006) Simultaneous, quantitative measurement and automated analysis of mitochondrial morphology, mass, potential and motility in living human skin fibroblasts, *Cytometry A* 69A: 1-12
28. **Koopman WJH**, Distelmaier F, Hink MA, Verkaart S, Wijers M, Fransen J, Smeitink JAM, Willems PHGM (2008a) Inherited complex I deficiency is associated with faster protein diffusion in the matrix of moving mitochondria. *Am J Physiol Cell Physiol* 294: C1124-C1132
29. **Koopman WJH**, Distelmaier F, Esseling JJ, Smeitink JAM, Willems PHGM (2008b) Computer-assisted live cell analysis of mitochondrial membrane potential, morphology and calcium handling. *Methods* 46: 304-311
30. **Lavalette D**, Hink MA, Tourbez M, Tétreau C, Visser AJ (2006) Proteins as microviscosimeters: Brownian motion revisited. *Eur Biophys J* 35: 517-522
31. **Levenberg K** (1944) A method for the solution of certain non-linear problems in least squares. *Quarterly Appl Math* 2: 164-168.
32. **Lorén N**, Hagman J, Jonasson JK, Deschout H, Bernin D, Cella-Zanacchi F, Diaspro A, McNally JG, Ameloot M, Smisdom N, (2015) Fluorescence recovery after photobleaching in material and life sciences: putting theory into practice. *Q Rev Biophys* 48: 323-387
33. **Malik AN**, Shahni R, Rodriguez-de-Ledesma A, Laftah A, Cunningham P (2011) Mitochondrial DNA as a non-invasive biomarker: accurate quantification using real time quantitative PCR without co-amplification of pseudogenes and dilution bias. *Bioch Biophys Res Comm* 412 :1-7
34. **Marquardt DW** (1963) An algorithm for the least-squares estimation of nonlinear parameters. *SIAM J Appl Math.* 11: 431-441.
35. **Minier F**, Sigel E (2004) Techniques: Use of concatenated subunits for the study of ligand-gated ion channels. *Trends Pharmacol Sci* 25: 499-503
36. **Monkos K** (2004) On the hydrodynamics and temperature dependence of the solution conformation of human serum albumin from viscometry approach. *Biochim Biophys Acta* 1700: 27-34
37. **Minton AP** (1981) Excluded volume as a determinant of macromolecular structure and reactivity. *Biopolymers* 20: 2093-2120
38. **Moullan N**, Mouchiroud L, Wang X, Ryu D, Williams EG, Mottis A, Jovaisaite V, Frochoux MV, Quiros PM, Deplancke B, *et al.* (2015) Tetracyclines disturb mitochondrial function across eukaryotic models: a call for caution in biomedical research. *Cell Rep* 10: 1681-1691
39. **Nooteboom M**, Forkink M, Willems PHGM, Koopman WJH (2012) Live-cell quantification of mitochondrial functional parameters. Chapter 6 in: *Neuromethods* 70: Visualization techniques, from immunohistochemistry to Magnetic Resonance Imaging (Badoer, E., ed.)
40. **Nicholls TJ**, Gustafsson CM (2018) Separating and segregating the human mitochondrial genome. *Trends Biochem Sci* 43: 869-881
41. **Ölveczky BP**, Verkman AS (1998) Monte Carlo analysis of obstructed diffusion in three dimensions: application to molecular diffusion in organelles. *Biophys J* 74: 2722-2730
42. **Pack C**, Saito K, Tamura M, Kinjo M (2006) Microenvironment and effect of energy depletion in the nucleus analyzed by mobility of multiple oligomeric EGFPs. *Biophys J* 91: 3921-3936

43. **Palmer AE**, Jin C, Reed JC, Tsien RY (2004) Bcl-2-mediated alterations in endoplasmic reticulum Ca<sup>2+</sup> analyzed with an improved genetically encoded fluorescent sensor. *Proc Natl Acad Sci USA* 101: 17404-17409
44. **Papadopoulos S**, Jürgens KD, Gros G (2000) Protein diffusion in living skeletal muscle fibers: Dependence on protein size, fiber type, and contraction. *Biophys J* 79: 2084-2094
45. **Partikian A**, Olveczky B, Swaminathan R, Li Y, Verkman AS (1998) Rapid diffusion of green fluorescent protein in the mitochondrial matrix. *J Cell Biol* 140: 821-829
46. **Perrin, F.** (1936) Mouvement Brownien d'un ellipsoïde (II). Rotation libre et dépolariation des fluorescences. Translation et diffusion de molécules ellipsoïdales. *J Phys Radium* 7: 1-11
47. **Prazeres DMF** (2008) Prediction of diffusion coefficients of plasmids. *Biotechnol Bioeng* 99:1040-1044
48. **Richter U**, Ng KY, Suomi F, Marttinen P, Turunen T, Jackson C, Suomalainen A, Vihinen H, Jokitalo E, Nyman TA, *et al.* (2019) Mitochondrial stress response triggered by defects in protein synthesis quality control. *Life Sci Alliance* 2: e201800219
49. **Rizzutto F**, Nakase H, Darras B, Francke U, Fabrizi GM, Mengel T, Walsh F, Kadenbach B, DiMauro S, Schon EA (1989) A gene specifying subunit VIII of human cytochrome-*c* oxidase is localized to chromosome 11 and is expressed in both muscle and non-muscle tissues. *J Biol Chem* 264: 10595–10600
50. **Saxton MJ** (2014) Wanted: Scalable tracers for diffusion measurements. *Phys Chem B* 118: 12805-12817
51. **Segawa M**, Wolf DM, Hultgren NW, Williams DS, van der Blik AM, Schackelford DB, Liesa M, Shirihaï OS. (2020) Quantification of cristae architecture reveals time-dependent characteristics of individual mitochondria. *Life Sci Alliance* 3: e201900620
52. **Shpilka T**, Haynes CM (2018) The mitochondrial UPR: mechanisms, physiological functions and implications in ageing. *Nat Rev Mol Cell Biol* 19: 109-120
53. **Sutherland W** (1905) A dynamical theory of diffusion for non-electrolytes and the molecular mass of albumin. *Philosophical Magazine* 9: 781–785
54. **Terry BR**, Matthews EK, Haseloff J. (1995) Molecular characterisation of recombinant green fluorescent protein by fluorescence correlation microscopy. *Biochem Biophys Res Commun* 217: 21-27
55. **Thubron EB**, Rosa HS, Hodges A, Sivaprasad S, Francis PT, Pienaar IS, Malik AN (2019) Regional mitochondrial DNA and cell-type changes in post-mortem brains of non-diabetic Alzheimer's disease are not present in diabetic Alzheimer's disease. *Sci Rep* 9: 11386
56. **Tyn MT**, Gusek TD (1990) Prediction of diffusion coefficients of proteins. *Biotechnol Bioeng* 35: 327-338
57. **Van Helvoort JMLM**, Kool J, Woldringh CL (1996) Chloramphenicol causes fusion of separated nucleoids in *Escherichia coli* K-12 cells and filaments. *J Bacteriol* 178: 4289-4293
58. **Vámosi G**, Mücke N, Müller G, Krieger JW, Curth U, Langowski J, Tóth K (2014) EGFP oligomers as natural fluorescence and hydrodynamic standards. *Sci Rep* 6: 33022
59. **Von Smoluchowski M** (1906) Zur kinetischen Theorie der Brownschen Molekularbewegung und der Suspensionen. *Annalen der Physik* 326: 756–780
60. **Weissert V**, Rieger B, Morris S, Arroum T, Psathaki OE, Zobel T, Perkins G, Busch KB (2021) Inhibition of the mitochondrial ATPase function by IF1 changes the spatiotemporal organisation of ATP synthase. *Biochim Biophys Acta Bioenerg* 1862: 148322
61. **Wilkins V**, Kohl W, Busch K (2012) Restricted diffusion of OXPHOS complexes in dynamic mitochondrial delays their exchange between cristae and engenders a transitory mosaic distribution. *J Cell Sci* 126: 103-116
62. **Willems PHGM**, Swarts HG, Hink MA, Koopman WJH (2009) Chapter 16: The use of fluorescence correlation spectroscopy to probe mitochondrial mobility and intramatrix protein diffusion. *Methods Enzymol* 456: 287-302

63. **Wolf DM**, Segawa M, Kondadi AK, Anand R, Bailey ST, Reichert AS, van der Blik AM, Schackelford DB, Liesa M, Shirihai O (2019) Individual cristae within the same mitochondrion display different membrane potentials and are functionally independent. *EMBO J* 38: e101056
64. **Xu M**, Bi X, He X, Yu X, Zhao M, Zhang W (2016) Inhibition of the mitochondrial unfolded protein response by acetylcholine alleviated hypoxia/reoxygenation-induced apoptosis of endothelial cells. *Cell Cycle* 15: 1331-1343
65. **Yang F**, Moss LG, Philips Jr, GN (1996) The molecular structure of green fluorescent protein. *Nature Biotechnol* 14: 1246-1251
66. **Young ME**, Carroad PA, Bell RL (1980) Estimation of diffusion coefficients of proteins. *Biotechnol Bioeng* 22: 947-955
67. **Zhao Q**, Wang J, Levichkin IV, Stasinopoulos S, Ryan MT, Hoogenraad NJ (2002) A mitochondrial specific stress response in mammalian cells. *EMBO J* 21: 4411-4419
