# Supplementary material for: Stress‐dependent macromolecular crowding in the mitochondrial matrix
Source: PubMed Central journal article supplement — EMBO J. 2023 Feb 24;42(7):e108533. doi: 10.15252/embj.2021108533 (PMC10068333; doi:10.15252/embj.2021108533), 2023-02-24
Supplement: EMBJ-42-e108533-s005.pdf [file EMBJ-42-e108533-s005.pdf]

# Stress-dependent macromolecular crowding in the mitochondrial matrix

Elianne P. Bulthuis, Cindy E.J. Dieteren, Jesper Bergmans, Job Berkhout, Jori A. Wagenaars, Els M.A. van de Westerlo, Emina Podhumljak, Mark A. Hink, Laura F.B. Hesp, Hannah S. Rosa, Afshan N. Malik, Mariska Kea-te Lindert, Peter H.G.M. Willems, Han J.G.E. Gardeniers, Wouter K. den Otter, Merel J.W. Adjobo-Hermans and Werner J.H. Koopman  
**DOI: 10.15252/emj.2021108533**

*Corresponding authors: Werner Koopman (Werner.Koopman@radboudumc.nl) , Merel Adjobo-Hermans (Merel.Adjobo-Hermans@radboudumc.nl), Wouter den Otter (w.k.denotter@utwente.nl)*

---

## Review Timeline:

|                     |             |
|---------------------|-------------|
| Submission Date:    | 21st Apr 21 |
| Editorial Decision: | 22nd Jun 21 |
| Revision Received:  | 26th Oct 22 |
| Editorial Decision: | 27th Dec 22 |
| Revision Received:  | 10th Jan 23 |
| Accepted:           | 19th Jan 23 |

---

*Editors: Daniel Klimmeck, Elisabetta Argenzio*

## Transaction Report:

(Note: With the exception of the correction of typographical or spelling errors that could be a source of ambiguity, letters and reports are not edited. Depending on transfer agreements, referee reports obtained elsewhere may or may not be included in this compilation. Referee reports are anonymous unless the Referee chooses to sign their reports.)

Dear Dr. Koopman,

Thank you for submitting your study entitled "Viscosity and macromolecular crowding in the mitochondrial matrix: impact on protein diffusion and structure" [EMBOJ-2021-108533]. The manuscript has been assessed by three reviewers, whose reports are enclosed below.

As you will see, the referees find your study potentially interesting. However, they also raise some points that need to be addressed before they can support publication here. In particular, referee #3 expresses several methodological concerns and requests additional experiments and controls to further substantiate the main findings. Also, during cross-commenting, the referees pointed out that the absolute values for the viscosity of the matrix need to be validated in a system where the viscosity can be more directly controlled. In addition, the linear regression to calculate viscosity upon CAP treatment should be repeated using also the other two available constructs to get a more reliable/robust graph.

Given the interest in your study, I am pleased to invite submission of a manuscript revised as indicated in the reports attached herein. I should also add that it is our policy to allow only a single round of major revision. Therefore, acceptance of your manuscript will depend on the completeness of your responses in this revised version.

We generally grant three months as standard revision time. As we are aware that many laboratories cannot function at full capacity owing to the COVID-19 pandemic, we may relax this deadline. Also, we have decided to apply our 'scooping protection policy' to the time span required for you to fully revise your manuscript and address the experimental issues highlighted herein. Nevertheless, please inform us as soon as a paper with related content is published elsewhere.

\*\*\*IMPORTANT NOTE: we perform an initial quality control of all revised manuscripts before re-review. Your manuscript will FAIL this control and the handling will be DELAYED if the following APPLIES:

- 1) Always include a Data Availability section.
- 2) Please use scatter blots showing the individual datapoints when  $n=2$ . The use of statistical tests needs to be justified.

When submitting your revised manuscript, please carefully review the instructions that follow below. Failure to include requested items will delay the evaluation of your revision.\*\*\*

When submitting your revised manuscript, we will require:

1) a .docx formatted version of the manuscript text (including legends for main figures, EV figures and tables). Please make sure that the changes are highlighted to be clearly visible.

2) individual production quality figure files as .eps, .tif, .jpg (one file per figure).

Please download our Figure Preparation Guidelines (figure preparation pdf) from our Author Guidelines pages [https://www.embopress.org/pb-assets/embo-site/EMBOPress\\_Figure\\_Guidelines\\_061115-1561436025777.pdf](https://www.embopress.org/pb-assets/embo-site/EMBOPress_Figure_Guidelines_061115-1561436025777.pdf)

for more info on how to prepare your figures.

3) a .docx formatted letter INCLUDING the reviewers' reports and your detailed point-by-point responses to their comments. As part of the EMBO Press transparent editorial process, the point-by-point response is part of the Review Process File (RPF), which will be published alongside your paper.

4) a complete author checklist, which you can download from our author guidelines. Please insert information in the checklist that is also reflected in the manuscript. The completed author checklist will also be part of the RPF.

5) Please note that all corresponding authors are required to supply an ORCID ID for their name upon submission of a revised manuscript (). Please find instructions on how to link your ORCID ID to your account in our manuscript tracking system in our Author guidelines

<https://www.embopress.org/page/journal/14602075/authorguide>

6) We replaced Supplementary Information with Expanded View (EV) Figures and Tables that are collapsible/expandable online. A maximum of 5 EV Figures can be typeset. EV Figures should be cited as 'Figure EV1, Figure EV2' etc... in the text and their respective legends should be included in the main text after the legends of regular figures.

- For the figures that you do NOT wish to display as Expanded View figures, they should be bundled together with their legends in a single PDF file called \*Appendix\*, which should start with a short Table of Content. Appendix figures should be referred to in

the main text as: "Appendix Figure S1, Appendix Figure S2" etc. See detailed instructions regarding expanded view here: <https://www.embopress.org/page/journal/14602075/authorguide#expandedview>

- Additional Tables/Datasets should be labeled and referred to as Table EV1, Dataset EV1, etc. Legends have to be provided in a separate tab in case of .xls files. Alternatively, the legend can be supplied as a separate text file (README) and zipped together with the Table/Dataset file.

7) Before submitting your revision, primary datasets (and computer code, where appropriate) produced in this study need to be deposited in an appropriate public database (see < <https://www.embopress.org/page/journal/14602075/authorguide#dataavailability>

Please remember to provide a reviewer password if the datasets are not yet public.

The accession numbers and database should be listed in a formal "Data Availability" section (placed after Materials & Method). Please note that the Data Availability Section is restricted to new primary data that are part of this study.

8) We would also encourage you to include the source data for figure panels that show essential data.

Numerical data should be provided as individual .xls or .csv files (including a tab describing the data). For blots or microscopy, uncropped images should be submitted (using a zip archive if multiple images need to be supplied for one panel). Additional information on source data and instruction on how to label the files are available .

9) Our journal encourages inclusion of \*data citations in the reference list\* to directly cite datasets that were re-used and obtained from public databases. Data citations in the article text are distinct from normal bibliographical citations and should directly link to the database records from which the data can be accessed. In the main text, data citations are formatted as follows: "Data ref: Smith et al, 2001" or "Data ref: NCBI Sequence Read Archive PRJNA342805, 2017". In the Reference list, data citations must be labeled with "[DATASET]". A data reference must provide the database name, accession number/identifiers and a resolvable link to the landing page from which the data can be accessed at the end of the reference. Further instructions are available at .

For use only with Method papers:

10) We would kindly ask you to use 'Structured Methods', our new Materials and Methods format, which is mandatory for Method papers (see example: <http://msb.embopress.org/content/14/7/e8071>). The Materials and Methods section should include a Reagents and Tools Table (listing key reagents, experimental models, software and relevant equipment and including their sources and relevant identifiers) followed by a Methods and Protocols section in which methods can be described using a step-by-step protocol format with bullet points. More information is available at .

11) Regarding data quantification

The following points must be specified in each figure legend:

- the name of the statistical test used to generate error bars and P values,
- the number (n) of independent experiments (please specify technical or biological replicates) underlying each data point,
- the nature of the bars and error bars (s.d., s.e.m.)

Discussion of statistical methodology can be reported in the materials and methods section, but figure legends should contain a basic description of n, P and the test applied.

- Please also include scale bars in all microscopy images.

12) As part of the EMBO publication's Transparent Editorial Process, The EMBO Journal publishes online a Review Process File to accompany accepted manuscripts. This File will be published in conjunction with your paper and will include the referee reports, your point-by-point response and all pertinent correspondence relating to the manuscript.

You are able to opt out of this by letting the editorial office know ([contact@embojournal.org](mailto:contact@embojournal.org)). If you do opt out, the Review Process File link will point to the following statement: "No Review Process File is available with this article, as the authors have chosen not to make the review process public in this case."

I look forward to seeing a revised version of your manuscript when it is ready. Please let me know if you have questions or comments regarding the revision.

Yours sincerely,

Elisabetta Argenzio, PhD  
Editor  
The EMBO Journal

Instructions for preparing your revised manuscript:

Please make sure you upload a letter of response to the referees' comments together with the revised manuscript.

Please also check that the title and abstract of the manuscript are brief, yet explicit, even to non-specialists.

When assembling figures, please refer to our figure preparation guideline in order to ensure proper formatting and readability in print as well as on screen:

<https://bit.ly/EMBOPressFigurePreparationGuideline>

**IMPORTANT:** When you send the revision we will require

- a point-by-point response to the referees' comments, with a detailed description of the changes made (as a word file).

- a word file of the manuscript text.

- individual production quality figure files (one file per figure)

- a complete author checklist, which you can download from our author guidelines

(<https://www.embopress.org/page/journal/14602075/authorguide>).

- Expanded View files (replacing Supplementary Information)

Please see out instructions to authors

<https://www.embopress.org/page/journal/14602075/authorguide#expandedview>

Please remember: Digital image enhancement is acceptable practice, as long as it accurately represents the original data and conforms to community standards. If a figure has been subjected to significant electronic manipulation, this must be noted in the figure legend or in the 'Materials and Methods' section. The editors reserve the right to request original versions of figures and the original images that were used to assemble the figure.

Further information is available in our Guide For Authors: <https://www.embopress.org/page/journal/14602075/authorguide>

Revision to The EMBO Journal should be submitted online within 90 days, unless an extension has been requested and approved by the editor; please click on the link below to submit the revision online before 20th Sep 2021:

-----  
Referee #1:

This is a highly innovative and interesting study describing one of the first attempts to quantify viscosity and molecular mobility within the mitochondrial matrix. The study is testing various ways to calculate changes in molecular mobility based on previously developed equations. The first part of the study looks at peptides of different molecular weights that were over-expressed in the cells and were fused to GFP. The study then employs chloramphenicol as a stress inducer to test the effect on these parameters.

There are a few ways this study can be improved both in the design as well as the presentation.

1. The manuscript is very lean on the explanation of the methodologies and on using illustrations to make these perceivable by biologists. The methods of each experiment should be described in detail enough so that others could imagine what exactly is done. The addition of illustrations can be very helpful.
2. Example of images used for the calculation of the different parameters highlighting the ROIs used the equation applied should be added to each experiment.
3. The limitation of each of the methods should have been studied and identified. There is only one criteria that is mentioned which are that mitochondria had to be in sufficient distance from others so that their borders can be clearly delineated. How was the expression level and the shape of the cell or mitochondria influencing each of the parameters?
4. The method should be validated against modulations of viscosity that can be calculated, such as changes in solutes in permeabilized cells and mitochondria.
5. Authors may want to consider the use of permeabilized isolated mitochondria to validate the approach.
6. GFP tends to aggregate and form dimers and oligomers. Has this been considered?
7. Chloramphenicol affects a large set of mitochondrial functions, including biogenesis and turnover, fuel preference, respiration, pH, and membrane potential. It also affects cristae density. Therefore, its use as a perturbation of cristae density is problematic. Perhaps the authors can use a more specific way to change cristae density such as the MICOS complex.

Referee #2:

The manuscript by Elianne P. Bulthuis et al addresses the interesting and timely question whether macromolecular crowding and/or viscosity plays a role in solute diffusion within the mitochondrial matrix. Applying expression of mitochondrially-targeted AcGFP1 concatemers in HeLa cells, they experimentally and computationally analyzed mobility of the fluorescence proteins and observed a decrease of mobility as a function of MW, which is typical for macromolecular crowding. Inhibition of respiration by chloramphenicol treatment resulted in increasing viscosity of the matrix, suggesting that impairment of mitochondrial function alters matrix viscosity and the degree of macromolecular crowding, which apparently can also affect molecular protein structure.

This is a very well written manuscript, the experiments and analysis are performed at high standards and are convincing. Overall, the conclusions are well supported by the data and report a previously unexplored aspect of mitochondrial biology, which likely has profound functional consequences. There are only a few minor points that should be addressed to improve the manuscript.

- Please highlight in the text the advantage of AcGFP1 compared to other GFP forms in respect to its absence of dimerization.
- In Figure 2 A, a combination of green and red lookup tables was used, which is unfavorable for colorblind people. The authors should consider using e.g., green and magenta to avoid this problem.
- In Figure 2 B, the higher molecular weight band of AcGFP14 seems to be present at a lower molecular weight (approx. 75 kDa) in the fluorescence analysis compared to the chemiluminescence detection with the anti-GFP antibody (approx. 100 kDa). This seems to be a result of incorrect alignment in Fig. 2 B when comparing the data with uncropped blots provided in the supplementary figure. Please adjust the alignment in Fig. 2 B accordingly.
- Representative micrographs for the CLSM and EM-based analysis of mitochondrial dimensions that were used for computation of Dsolvent should be provided in a supplementary figure.
- The authors should include a discussion of the dynamic ultrastructural changes in mitochondria and particularly the compaction of the matrix as observed previously, for example in classical work by C R Hackenbrock 1966 (PMID: 5968972). Discussing how structural changes could impact protein concentrations, viscosity and protein stability could add yet another twist to the manuscript.

Referee #3:

The manuscript by Bulthuis et al. performs measurements of mitochondrial matrix viscosity based on FRAP and FLIP using fluorescent proteins of increasing molecular size targeted to mitochondria. This is a very similar study to that published by the same group some years ago (Dieteren et al., 2011a) but using a different cell type (HeLa cells instead of HEK) and more proteins (concatemers of 1 to 4 GFP molecules, instead of only 1 and 2). This manuscript also contains the novelty of performing the measurements in cells treated with chloramphenicol (CAP) to inhibit mitochondrial translation and induce mitochondrial respiratory deficiency.

The findings are potentially interesting for the field. However, the study, in its current form, raises major methodological concerns. Also, the results shown do not support the major conclusion, which is that changes in matrix viscosity would affect enzymatic functions that take place inside mitochondria.

1. The results clearly show that the matrix viscosity increases with CAP treatment. However, the matrix viscosity measurements in this study in basal conditions, between 2.68 and 3.32 cP, are slightly higher but still in the same order of magnitude that those measured in Dieteren et al., 2011a, using exactly the same methodology. However, they are about 10- to 20-fold lower than other measurements performed by three different independent methods and research groups. The authors try to justify this discrepancy in page 13, but they claim that it is possibly due to BODIPY binding to mitochondrial membranes or because of different experimental settings. However, not all of these methods were based on BODIPY probes and they all seemed to have calculated more similar values to each other, which are significantly higher than in this manuscript or this group's previous work. This is a key point of this study, and it would be convenient to try to clarify this or reconcile these findings by using alternative measurement methods and/or mathematical models.

2. As pointed out by the authors, the expression levels of the different GFP concatemers vary greatly, but it is not exactly a function of their MW as AcAGFP3 levels are lower than AcGFP4 (Figure 2B). When looking at Figure 2A, the impression is that fewer cells actually express the AcGFP3 rather than the expression per cell being lower. And this is also indicated by Figure 2C when comparing the flow cytometry plot of AcGFP3 vs AcGFP4.

3. The appearance of the degradation product in the AcGFP4 is highly concerning because, as shown in the paper, it definitely affects the measurements. The authors were able to come up with a corrected Tmono coefficient (Figures 3A) by adjusting the data from the rest of the concatemers to a linear fit. However, in the CAP treatment experiments, they only use AcGFP1 and AcGFP4, for which they calculate the corrected coefficient with a linear regression using two points (the axis origins and the data for AcGF1) (Figure S2E), which one could say that it is not exactly accurate.

4. In line with the previous point, all the measurements in the CAP treated cells were done using AcGFP1 and AcGFP4. As mentioned, the measurements with AcGFP4 are not exactly reliable because of the coexistence of a lower MW species. In addition, many conclusions are based on linear regressions using two points (Figure 5C and 6A and B).
5. The fact that the GFP concatemers are in linear conformation in normal cells and in compact form in the CAP treated cells is only based on mathematical predictions and there are no actual measurements. Again, the fact that they theoretically diverge from the linear fit in Figure 5C (right panel) is based on a line that passes through two points, when one of them is not exactly reliable.
6. The conclusion of points 4 and 5 is that the authors should consider performing the measurements in CAP treated cells using AcGFP3 and AcGFP4 in order to obtain more reliable results and more robust conclusions.
7. It is logical to think that the consequence of CAP treatment is the increase of protein content in the matrix due to the nuclear-encoded components of the OXPHOS system not being able to assemble into the membrane when the mtDNA-encoded subunits are missing. However, this was not shown experimentally in a direct way. The changes observed in matrix 'darkness' by EM show great variability (Figure 4C) and do not seem to be of a magnitude that would explain the 20-fold increases in viscosity. Also, this parameter is already different, according to the statistical significance, between AcGFP1 and AcGFP4, both CAP treated and untreated (why?). The paper cited to explain this possible phenomenon (Bisht et al. 2016) is speculative and describes a completely different phenomenon. The authors show in Figures S6 and S7 that there is no UPRmt, so this would indicate that there are no unfolded proteins inside the mitochondrial matrix. Some of the proteins they tested for in these figures are actually mitochondrial matrix proteins and they did not show any increase. Also, one has to take into account that a decrease in OXPHOS activity and of membrane potential also affects mitochondrial protein import, so this could decrease the amount of protein that are reaching the mitochondria. Therefore, the authors should demonstrate that the mitochondrial protein content actually increases with the CAP treatment by performing cellular and submitochondrial fractionation and testing for OXPHOS related nuclear-encoded proteins.
8. The conclusion that macromolecular crowding increments the viscosity in the matrix and that this affects mitochondria bioreactions has not been substantiated in this study. CAP treatment logically decreases OXPHOS function, as shown in Figure S6A, B and C, because complexes I, III, IV and V cannot be formed. However, one could think of measuring the activity of TCA cycle or beta oxidation enzymes, for example, to determine whether these potential physicochemical changes in the mitochondrial matrix really affect the processes located in there.

**REBUTTAL TO THE COMMENTS OF REFEREE 1**

We thank the referee for her/his positive and constructive comments. We have performed additional experiments (FRAP) with AcGFP1, AcGFP1<sup>2</sup>, AcGFP1<sup>3</sup> and AcGFP1<sup>4</sup> for CAP-treated cells and created a new computer model for data analysis from scratch to better reflect the cristae structure in HeLa cells (the model in the original version of the manuscript was developed for HEK293 cells). The latter has not impacted on the message of the manuscript. Moreover, we performed TMRM experiments in the context of the orthodox-condensed transition in CAP-treated cells (comment of referee 2). Textually, we added a substantial number of new references and have rewritten large parts of the manuscript (and changed figures: main, expanded view and appendix) to enhance clarity. All changes are highlighted (yellow) in the revised manuscript.

**Comment 1:** The manuscript is very lean on the explanation of the methodologies and on using illustrations to make these perceivable by biologists. The methods of each experiment should be described in detail enough so that others could imagine what exactly is done. The addition of illustrations can be very helpful.

**Reply 1:** We have extensively rewritten the main text of the manuscript, as well as the Appendix, to address this point. We now included/updated several explanatory cartoons to better explain our reasoning and experimental approach as follows: (1) Fig. 1 explains the overall strategy of the experimental approach with direct references to key figures (marked red), (2) Fig. 3C explains how we use the computer model to determine the diffusion constant from the experimental FRAP data, (3) Fig. 6A visualizes how our data can be interpreted in the context of macromolecular crowding, (4) Fig. 6B illustrates how mitochondrial macromolecular crowding fits in the broader concept of mitochondrial morphofunction and mitochondrial and cellular physiology, (5) Fig. EV1 explains the concept of “compact” and “extended” structure for the four fluorescent proteins used in this study, (6) Appendix Fig. S2A shows how the FRAP and FLIP regions were selected, (7) Appendix Fig. S2F shows how mitochondrial dimensions were calculated (for EM this is explained in the Appendix-Materials and Methods), and (8) Appendix Fig. S3A shows the structure and properties of the computer model. With respect to the latter, we developed a completely new computer model (Brownian Dynamics; BD) to be able to compute the solvent-dependent diffusion constants for the fluorescent proteins ( $D_{\text{solvent}}$ ) in HeLa mitochondria. This new BD model essentially gave the same results as the model used in the originally submitted manuscript (developed for HEK293 cells), but better reflected the cristae geometry in HeLa cells. This is explained in detail throughout the main text and in the Appendix (yellow).

**Comment 2:** Example of images used for the calculation of the different parameters highlighting the ROIs used the equation applied should be added to each experiment.

**Reply 2:** We used ROIs for analysis of the FRAP signal (these ROIs are shown in Fig. 3A and Appendix Fig. S2A), EM intensity (ROIs are shown in lower right panel of Fig. 5A) and TMRM intensity (new experimental data; ROIs depicted in Fig. EV2D (left panel)). To quantify mitochondrial diameter and length we performed a line-profile analysis (illustrated in Appendix Fig. S2F and also explained in the Appendix-Materials and Methods).

**Comment 3:** The limitation of each of the methods should have been studied and identified. There is only one criteria that is mentioned which are that mitochondria had to be in sufficient distance from others so that their borders can be clearly delineated. How was the expression level and the shape of the cell or mitochondria influencing each of the parameters?

**Reply 3:** Intense illumination of AcGFP1 is not phototoxic (info now added to the Appendix). Confocal microscopy was used for the FRAP experiments and mitochondria have a diameter  $< 1 \mu\text{m}$  in our studies (Table 1) No biasing selection was made based upon the initial fluorescence intensity of the mitochondria (signals were not saturated). As primary quality control criteria (Results section) we state that: “As a quality control measure this analysis included only individual mitochondria: (i) that were fully located within the focal plane (confirmed by an

axial scan) and, (ii) in which FRAP was paralleled by fluorescence loss in photobleaching (FLIP) in a part distal to the FRAP region (Appendix Fig. S2), indicating that these mitochondria possessed a continuous matrix.” To reduce noise, multiple FRAP experiments were averaged (Fig. 3A). This yielded similar errors on the average  $T_{\text{mono}}$  values within the -CAP and + CAP conditions (Table 1). By rewriting large parts of the manuscript, we also aimed to better indicate the potentially weak points of the used strategies. For instance, the occurrence of a breakdown product in AcGFP1<sup>4</sup>-expressing cells (e.g. Fig. 2B) and the inability to use the mathematical model for  $D_{\text{solvent}}$  quantification in CAP-treated AcGFP1<sup>2</sup>-, AcGFP1<sup>3</sup>- and AcGFP1<sup>3</sup>-expressing cells (Results section: “Chloramphenicol decreases the number of cristae, increases matrix electron density and partially immobilizes matrix-targeted FPs”)

**Comment 4:** The method should be validated against modulations of viscosity that can be calculated, such as changes in solutes in permeabilized cells and mitochondria. Authors may want to consider the use of permeabilized isolated mitochondria to validate the approach.

**Reply 4:** We fully understand this comments and discussed with several of our expert colleagues in the field on how to technically perform such experiments. However, neither we nor our colleagues were able to come up with a reliable and easy to interpret experimental strategy to address this comment. The main issue is that information is required on the impact of the permeabilization procedure on the macromolecular crowding level and viscosity of the matrix fluid. Ideally, one would like to isolate the mitochondrial matrix “fluid” (solvent) and measure diffusion of solutes in this fluid by classical means. However, doing such an analysis would require huge amounts of mitochondrial matrix fluid, which is practically unfeasible. In addition, as far as we know, there is no quantitative strategy that allows a 100% pure isolation and/or proper normalization of the amount of isolated matrix fluid. Given the relevance of this comment, we contacted Dr. Michael J. Saxton (University of California, Davis, USA), which is an expert on diffusion tracer analysis, and included experimental data from his paper (Saxton, J. Phys. Chem. B., 2014) in the revised manuscript. This allowed us to compare our mitochondrial diffusion data with the behavior of a large set of biomolecules (with different structural conformations) in aqueous solution. Additional inclusion of further experimental studies, allowed comparison of our mitochondrial diffusion data with EYFP diffusion in the cytosol and nucleus of HeLa cells. This approach is now described in detail in the Results section under “The mitochondrial matrix solvent reduces FP mobility in a manner compatible with macromolecular crowding” and in Fig. 4A-B. Using this strategy also delivered results compatible with other experimental studies (now cited in the revised manuscript). Taken together, we feel that this strategy is a good compromise between the experimentally possible and theoretical analysis. We hope that the reviewer can agree on this.

**Comment 5:** GFP tends to aggregate and form dimers and oligomers. Has this been considered?

**Reply 5:** We apologize for this omission. AcGFP1 is monomeric and to the best of our knowledge has no known binding partners. This is now stated in the Materials and Methods and Appendix.

**Comment 6:** Chloramphenicol affects a large set of mitochondrial functions, including biogenesis and turnover, fuel preference, respiration, pH, and membrane potential. It also affects cristae density. Therefore, its use as a perturbation of cristae density is problematic. Perhaps the authors can use a more specific way to change cristae density such as the MICOS complex.

**Reply 6:** This is a good point. However, the primary aim of our study was to investigate whether the mitochondrial matrix fluid exhibits macromolecular crowding. This is now more clearly stated throughout the manuscript (also the manuscript title was changed). Related to our primary aim, we provide evidence that macromolecular crowding occurs in the absence of CAP (Fig. 4AB). Based upon our previous work, we applied CAP treatment as a means to increase the amount of protein (and thereby the macromolecular crowding level) in the mitochondrial matrix. It is difficult to predict whether CAP treatment would impact on matrix fluorescent protein diffusion by the abovementioned effects. For the sake of diffusion analysis, we demonstrated functional



mitochondrial impairment (Expanded view Figure EV2A-B-C-D), but no effect on mitochondrial dimensions or volume (Table 1). We also could not demonstrate effects of CAP on UPR<sup>mt</sup>-markers, mtDNA-levels and mitochondrial fission/fusion protein levels (Expanded view Figure EV2E-F-G). In this sense, our results support the conclusion that macromolecular crowding is increased in CAP-treated cells. This is now more clearly stated and better explained in the revised manuscript. In the revised version of the manuscript we also now included new experiments for CAP-treated cells with AcGFP<sup>1</sup>, AcGFP<sup>2</sup> and AcGFP<sup>3</sup> and AcGFP<sup>4</sup> (Table 1 and Fig. 5D-E-F). The experimental FRAP data for the CAP-treated cells displayed a slower recovery and an increasing immobile fraction as a function of MW of the proteins (Fig. 5D). Although the new BD model was unable to quantitatively reproduce this experimental CAP data (*i.e.* the simulated FRAP curves displayed no immobile fraction; Appendix Fig. S3), the enhanced immobile fraction supports the conclusion that macromolecular crowding is increased. Regarding the MICOS complex, this is an interesting idea. However, it would require transient transfection to target MICOS-complex proteins. Although this is technically feasible, one would need information on whether mitochondrial internal structure is changed (*i.e.* MICOS-targeting transfection was efficient) at the level of single mitochondria. This means that for each mitochondrion for which a FRAP curve is obtained, it is necessary to have information on its internal structure (by EM). The latter is essential for generating adequate computer model-mediated prediction of  $D_{\text{solvent}}$ . We feel that, although highly interesting, such an approach falls outside the scope of the current study.

**REBUTTAL TO THE COMMENTS OF REFEREE 2**

We thank the referee for her/his positive and constructive comments. We have performed additional experiments (FRAP) with AcGFP1, AcGFP1<sup>2</sup>, AcGFP1<sup>3</sup> and AcGFP1<sup>4</sup> for CAP-treated cells and created a new computer model for data analysis from scratch to better reflect the cristae structure in HeLa cells (the model in the original version of the manuscript was developed for HEK293 cells). The latter has not impacted on the message of the manuscript. Moreover, we performed TMRM experiments in the context of the orthodox-condensed transition in CAP-treated cells (comment by this referee). Textually, we added a substantial number of new references and have rewritten large parts of the manuscript (and changed figures: main, expanded view and appendix) to enhance clarity. All changes are highlighted (yellow) in the revised manuscript.

**Comment 1:** Please highlight in the text the advantage of AcGFP1 compared to other GFP forms in respect to its absence of dimerization.

**Reply 1:** We apologize for this omission. AcGFP1 is monomeric and to the best of our knowledge has no known binding partners. This is now stated in the Materials and Methods and Appendix.

**Comment 2:** In Figure 2A, a combination of green and red lookup tables was used, which is unfavorable for colorblind people. The authors should consider using e.g., green and magenta to avoid this problem.

**Reply 2:** This error was corrected (Fig. 2A).

**Comment 3:** In Figure 2 B, the higher molecular weight band of AcGFP14 seems to be present at a lower molecular weight (approx. 75 kDa) in the fluorescence analysis compared to the chemiluminescence detection with the anti-GFP antibody (approx. 100 kDa). This seems to be a result of incorrect alignment in Fig. 2 B when comparing the data with uncropped blots provided in the supplementary figure. Please adjust the alignment in Fig. 2 B accordingly.

**Reply 3:** This is probably due to the gel-front not running perfectly horizontal (see Appendix Fig. S1). In this context, we now better discuss the apparent MW of the fluorescent proteins in the Discussion (first paragraph)

**Comment 4:** Representative micrographs for the CLSM and EM-based analysis of mitochondrial dimensions that were used for computation of Dsolvent should be provided in a supplementary figure.

**Reply 4:** This information is now included in Appendix Fig. S2A (CLSM) and in the Appendix-Materials and Methods (section: “[Electron Microscopy](#)”).

**Comment 5:** The authors should include a discussion of the dynamic ultrastructural changes in mitochondria and particularly the compaction of the matrix as observed previously, for example in classical work by CR Hackenbrock 1966 (PMID: 5968972). Discussing how structural changes could impact protein concentrations, viscosity and protein stability could add yet another twist to the manuscript.

**Reply 5:** We now included this topic in the Discussion (section: “CAP treatment does not induce mitochondrial orthodox-to-condensed transition” and in this context also performed additional TMRM experiments (Expanded Fig. EV2).

### **REBUTTAL TO THE COMMENTS OF REFEREE 3**

We thank the referee for her/his positive and constructive comments. We have performed additional experiments (FRAP) with AcGFP1, AcGFP1<sup>2</sup>, AcGFP1<sup>3</sup> and AcGFP1<sup>4</sup> for CAP-treated cells and created a new computer model for data analysis from scratch to better reflect the cristae structure in HeLa cells (the model in the original version of the manuscript was developed for HEK293 cells). The latter has not impacted on the message of the manuscript. Moreover, we performed TMRM experiments in the context of the orthodox-condensed transition in CAP-treated cells (comment of referee 2). Textually, we added a substantial number of new references and have rewritten large parts of the manuscript (and changed figures: main, expanded view and appendix) to enhance clarity. All changes are highlighted (yellow) in the revised manuscript.

**Comment 1:** The results clearly show that the matrix viscosity increases with CAP treatment. However, the matrix viscosity measurements in this study in basal conditions, between 2.68 and 3.32 cP, are slightly higher but still in the same order of magnitude that those measured in Dieteren et al., 2011a, using exactly the same methodology. However, they are about 10- to 20-fold lower than other measurements performed by three different independent methods and research groups. The authors try to justify this discrepancy in page 13, but they claim that it is possibly due to BODIPY binding to mitochondrial membranes or because of different experimental settings. However, not all of these methods were based on BODIPY probes and they all seemed to have calculated more similar values to each other, which are significantly higher than in this manuscript or this group's previous work. This is a key point of this study, and it would be convenient to try to clarify this or reconcile these findings by using alternative measurement methods and/or mathematical models.

**Reply 1:** This is a very difficult issue to resolve. To the best of our knowledge, there are not many studies presenting quantitative information regarding mitochondrial matrix solvent viscosity (*i.e.* cP values). We further observed that the published papers (including recent reviews) do not discuss the discrepancy between the novel (rotor-based) studies and the earlier studies of ourselves and the Verkman group (using FRAP and fluorescence correlation spectroscopy experiments). To address this comment, we have totally rewritten and extended this section in the Discussion (section: “Viscosity of the mitochondrial matrix solvent in the absence of CAP”). In response to Comment 4 of Referee 1, we also investigated the possibilities for alternative measurements of mitochondrial matrix fluid (see our response there). With respect to the latter, we feel that the strategy presented is a good compromise between experimental and theoretical analysis (using our new, more HeLa-tailored, FRAP model) and hope that the reviewer can agree on this.

**Comment 2:** As pointed out by the authors, the expression levels of the different GFP concatemers vary greatly, but it is not exactly a function of their MW as AcAGFP3 levels are lower than AcGFP4 (Figure 2B). When looking at Figure 2A, the impression is that fewer cells actually express the AcGFP3 rather than the expression per cell being lower. And this is also indicated by Figure 2C when comparing the flow cytometry plot of AcGFP3 vs AcGFP4.

**Reply 2:** We fully agree with this remark and now have adapted the relevant part in the Results (section: “Expression, localization and integrity of mitochondrial matrix-targeted FPs”). Given the logarithmic scale in Fig. 2C (flow cytometry), the fluorescence of most cells (red, green, blue, purple) is above the lowest value (black dots in Fig. 2C: “parental”). There is also low expression of the concatemers in the absence of DOX (black dots in Fig. 2C for AcGFP1, AcGFP1<sup>2</sup>, AcGFP1<sup>3</sup> and AcGFP1<sup>4</sup>). It is always challenging to directly link microscopy images of individual cells (Fig. 2A) to data from large cell populations (Fig. 2C). Therefore we now more carefully state in the Results that: “Fluorescence analysis by flowcytometry (Fig. 2C) correlated well with in-gel fluorescence signals (Fig. 2D). This demonstrates that all inducible FP cell lines exhibit a low fluorescence signal in their non-induced state, and strongly suggests that the cellular fluorescence intensities reflect mitochondria-specific signals. The former observation is compatible with low-level induction (“leakage”) of FP expression in the mitochondrial matrix occurring in the absence of added DOX, as observed previously in our DOX-inducible HEK293 cell models (Dieteren et al., 2011b)”.

**Comment 3:** The appearance of the degradation product in the AcGFP4 is highly concerning because, as shown in the paper, it definitely affects the measurements. The authors were able to come up with a corrected Tmono coefficient (Figures 3A) by adjusting the data from the rest of the concatemers to a linear fit. However, in the CAP treatment experiments, they only use AcGFP1 and AcGFP4, for which they calculate the corrected coefficient with a linear regression using two points (the axis origins and the data for AcGFP1) (Figure S2E), which one could say that it is not exactly accurate. In line with the previous point, all the measurements in the CAP treated cells were done using AcGFP1 and AcGFP4. As mentioned, the measurements with AcGFP4 are not exactly reliable because of the coexistence of a lower MW species. In addition, many conclusions are based on linear regressions using two points (Figure 5C and 6A and B). The fact that the GFP concatemers are in linear conformation in normal cells and in compact form in the CAP treated cells is only based on mathematical predictions and there are no actual measurements. Again, the fact that they theoretically diverge from the linear fit in Figure 5C (right panel) is based on a line that passes through two points, when one of them is not exactly reliable. The conclusion ..... is that the authors should consider performing the measurements in CAP treated cells using AcGFP3 and AcGFP4 in order to obtain more reliable results and more robust conclusions.

**Reply 3:** We fully agree with this comment and now included new experimental data for AcGFP1, AcGFP1<sup>2</sup>, AcGFP1<sup>3</sup> and AcGFP1<sup>4</sup> in CAP-treated cells in the revised manuscript (Table 1 and Fig. 5D-E-F). Although the new (HeLa-specific) mathematical FRAP model was unable to quantitatively reproduce this experimental CAP data (*i.e.* the simulated FRAP curves displayed no immobile fraction; Appendix Fig. S3), the enhanced immobile fraction supports the conclusion that macromolecular crowding is increased in CAP-treated cells. Regarding the conformation of the fluorescent concatemers, we now more robustly investigated this in the absence of CAP (Fig. 4AB and Results section: “Quantifying the viscosity of the mitochondrial matrix solvent and predicting FP structural conformation”). In the presence of CAP, the viscosity was determined using the FRAP time constant of AcGFP1, which was still compatible with the mathematical FRAP model. This is also explained in the section: “Quantifying the viscosity of the mitochondrial matrix solvent and predicting FP structural conformation”.

**Comment 4:** It is logical to think that the consequence of CAP treatment is the increase of protein content in the matrix due to the nuclear-encoded components of the OXPHOS system not being able to assemble into the membrane when the mtDNA-encoded subunits are missing. However, this was not shown experimentally in a direct way. The changes observed in matrix 'darkness' by EM show great variability (Figure 4C) and do not seem to be of a magnitude that would explain the 20-fold increases in viscosity. Also, this parameter is already different, according to the statistical significance, between AcGFP1 and AcGFP4, both CAP treated and untreated (why?). The paper cited to explain this possible phenomenon (Bisht et al. 2016) is speculative and describes a completely different phenomenon. The authors show in Figures S6 and S7 that there is no UPRmt, so this would indicate that there are no unfolded proteins inside the mitochondrial matrix. Some of the proteins they tested for in these figures are actually mitochondrial matrix proteins and they did not show any increase. Also, one has to take into account that a decrease in OXPHOS activity and of membrane potential also affects mitochondrial protein import, so this could decrease the amount of protein that are reaching the mitochondria. Therefore, the authors should demonstrate that the mitochondrial protein content actually increases with the CAP treatment by performing cellular and submitochondrial fractionation and testing for OXPHOS related nuclear-encoded proteins.

**Reply 5:** The primary aim of our study was to investigate whether the mitochondrial matrix fluid exhibits macromolecular crowding. This is now more clearly stated throughout the manuscript (also the manuscript title was changed). We provide evidence that macromolecular crowding occurs in the absence of CAP (Fig. 4AB; Results section: “The mitochondrial matrix solvent reduces FP mobility in a manner compatible with macromolecular crowding”). The darker matrix of AcGFP1 relative to AcGFP1<sup>4</sup> in the absence and presence of CAP (Fig. 5C), is compatible with the expression levels of AcGFP1 (higher) and AcGFP1<sup>4</sup> (lower) shown in Fig. 2B-C (absence of CAP) and Appendix Fig. 1A-B (absence and presence of CAP). To address Comment 4 (*i.e.* regarding macromolecular crowding in CAP-treated cells, EM data and UPRmt) we now have rewritten and more carefully phrased the appropriate sections in the Results (“Chloramphenicol decreases the number of cristae, increases matrix electron density and partially immobilizes matrix-targeted FPs”) and Discussion (“CAP treatment

slows solute diffusion and increases mitochondrial matrix viscosity”). We now also performed TMRM measurements for semi-quantitative analysis of mitochondrial deltaPSI and demonstrate a potential hyperpolarization in CAP-treated cells (Expanded view Fig. EV2D). Regarding experimental strategies to demonstrate the “increase in protein content in a more direct way” please see our reply to Comment 4 of Referee 1.

**Comment 7:** The conclusion that macromolecular crowding increments the viscosity in the matrix and that this affects mitochondria bioreactions has not been substantiated in this study. CAP treatment logically decreases OXPHOS function, as shown in Figure S6A, B and C, because complexes I, III, IV and V cannot be formed. However, one could think of measuring the activity of TCA cycle or beta oxidation enzymes, for example, to determine whether these potential physicochemical changes in the mitochondrial matrix really affect the processes located in there.

**Reply 7:** Indeed we did not directly demonstrate that macromolecular crowding and viscosity in the mitochondrial matrix alter mitochondrial reactions. However, the aim of the study was to investigate whether macromolecular crowding was occurring in the mitochondrial matrix fluid. In our view, we have provided evidence that this crowding occurs (albeit at low levels) in the absence of CAP, and (likely) in the presence of CAP. We agree with the Referee that understanding the effect of this crowding on the activity of mitochondrial enzymes is highly relevant. However, this would require an experimentally-accessible in-situ readout of this activity at the level of individual mitochondria within living cells. If at all possible, this would require a complete new experimental strategy/study, which we feel falls outside the scope of the current study. To reflect this comment, we have rewritten and more carefully phrased the last section of the Discussion (“[Summary and conclusion](#)”).

Dear Dr Koopman,

Thank you for submitting your revised manuscript (EMBOJ-2021-108553R) to The EMBO Journal. Your amended study was sent back to the three referees for their re-evaluation, and we have received comments from two of them, which I enclose below. Please note that while referee #3 was at this time not able to reassess the work, we have considered your response to this expert's critique carefully in the editorial team and found all issues to be satisfactorily addressed. As you will see, the other reviewers stated that the work has been substantially improved by the revisions and that they are now broadly in favour of publication, pending minor revision.

Thus, we are pleased to inform you that your manuscript has been accepted in principle for publication in The EMBO Journal.

Please consider referee #1's additional comments regarding the abstract wording by adjusting it to a broader audience.

We also now need you to take care of a number of minor issues related to formatting and data annotation as detailed below, which should be addressed at re-submission.

Please contact me at any time if you have additional questions related to below points.

As you might have seen on our web page, every paper at the EMBO Journal now includes a 'Synopsis', displayed on the html and freely accessible to all readers. The synopsis includes a 'model' figure as well as 2-5 one-short-sentence bullet points that summarize the article. I would appreciate if you could provide this figure and the bullet points.

Thank you for giving us the chance to consider your manuscript for The EMBO Journal. I look forward to your final revision.

Again, please contact me at any time if you need any help or have further questions.

Kind regards,

Daniel Klimmeck

Daniel Klimmeck PhD  
Senior Editor  
The EMBO Journal

\*\*\*\*\*

Formatting changes required for the revised version of the manuscript:

>> Please change the Reference List format from numbered to alphabetical only.

>> Change the title of the current 'Conflict of Interest' statement to 'Disclosure and Competing Interests Statement'.

>> Introduce a separate 'Statistical Analysis' section in the Material and Methods part, detailing the algorithms applied.

>> Author Contributions: Please remove the author contributions information from the manuscript text. Note that CRediT has replaced the traditional author contributions section as of now because it offers a systematic machine-readable author contributions format that allows for more effective research assessment. and use the free text boxes beneath each contributing author's name to add specific details on the author's contribution.

More information is available in our guide to authors.

<https://www.embopress.org/page/journal/14602075/authorguide>

>> Please move the 'Dataset availability section' to the end of the Material & Methods part.

>> Callouts: recheck and adjust order of callouts for figures 5A and 4 in the main text.

>> Appendix file: please amend the ToC on the first page with page numbers.

>> As to our journal policies, we kindly ask you to provide uncropped, unassembled source data files for the western blots shown

in Appendix Figures S4 and S5.

>> Consider additional changes and comments from our production team as indicated by the .doc file enclosed and leave changes in track mode.

In the interest of protecting the conceptual advance provided by the work, we recommend a revision within 3 months (26th Mar 2023).

-----  
Referee #1:

The revised manuscript represents a significant improvement over the original version. I only have minor points of major importance to make this future paper read by the EMBO readership. The authors need to have a biologist outside their field review the abstract and approve that it is clear and interesting. As it is now, the abstract is only clear after one reads the paper, which is not what the abstract intended. Currently, the paper is fascinating, but the abstract reads as if it was copied from the methods section and is not reflecting the excitement of the findings in the paper.

Assume that the readers have never heard about Macromolecular crowding. Most scientists did not, and all of the mitochondria scientists did not. I suggest you explain in a couple of words in the opening of the abstract what it is and why this is important.

You can remove the first sentence of the abstract as it is not informative to EMBO readers.

Referee #2:

The authors have addressed all the points we raised on the initial version in a satisfactory manner. I think this is a very interesting study that shed new lights onto previously overlooked aspects of mitochondrial biology.

The authors addressed the minor editorial issues.



Dear Dr Koopman,

Thank you for submitting the revised version of your manuscript. I have now evaluated your amended manuscript and concluded that the remaining minor concerns have been sufficiently addressed.

Thus, I am pleased to inform you that your manuscript has been accepted for publication in the EMBO Journal.

Please note that it is EMBO Journal policy for the transcript of the editorial process (containing referee reports and your response letter) to be published as an online supplement to each paper.

Also, in case you might NOT want the transparent process file published at all, you will also need to inform us via email immediately. More information is available here:

<https://www.embopress.org/page/journal/14602075/authorguide#transparentprocess>

-----  
Please note that in order to be able to start the production process, our publisher will need and contact you shortly regarding the page charge authorisation and licence to publish forms.

Authors of accepted peer-reviewed original research articles may choose to pay a fee in order for their published article to be made freely accessible to all online immediately upon publication. The EMBO Open fee is fixed at \$6,100 USD / £4,950 GBP / €5,500 EUR (+ VAT where applicable).

We offer two licenses for Open Access papers, CC-BY and CC-BY-NC-ND.

For more information on these licenses, please visit:

[http://creativecommons.org/licenses/by-nc-nd/3.0/deed.en\\_US](http://creativecommons.org/licenses/by-nc-nd/3.0/deed.en_US)

Please be reminded that under the DEAL agreement of European scientific institutions with our publisher Wiley, you could be eligible for free publication of your article in the open access format. Please contact either the administration at your institution or Wiley ([embojournal@wiley.com](mailto:embojournal@wiley.com)) to clarify further questions.

Should you be planning a Press Release on your article, please get in contact with [embojournal@wiley.com](mailto:embojournal@wiley.com) as early as possible, in order to coordinate publication and release dates.

On a different note, I would like to alert you that EMBO Press is currently developing a new format for a video-synopsis of work published with us, which essentially is a short, author-generated film explaining the core findings in hand drawings, and, as we believe, can be very useful to increase visibility of the work. This has proven to offer a nice opportunity for exposure i.p. for the first author(s) of the study. Please see the following link for representative examples and their integration into the article web page:

[https://www.embopress.org/video\\_synopses](https://www.embopress.org/video_synopses)

<https://www.embopress.org/doi/full/10.15252/embojournal.2019103932>

Please let me know, should you be interested to engage in commissioning a similar video synopsis for your work. According operation instructions are available and intuitive.

If you have any questions, please do not hesitate to call or email the Editorial Office.

Thank you for this contribution to The EMBO Journal and congratulations on a successful publication!

Please consider us again in the future for your most exciting work.

Best regards,

Daniel Klimmeck

Daniel Klimmeck, PhD  
Senior Editor  
The EMBO Journal  
EMBO  
Postfach 1022-40  
Meyerhofstrasse 1  
D-69117 Heidelberg  
contact@embojournal.org  
Submit at: <http://emboj.msubmit.net>

t

## EMBO Press Author Checklist

|                                                |
|------------------------------------------------|
| Corresponding Author Name: Werner J.H. Koopman |
| Journal Submitted to: EMBO J                   |
| Manuscript Number: EMBOJ-2021-108533           |

### USEFUL LINKS FOR COMPLETING THIS FORM

[The EMBO Journal - Author Guidelines](#)  
[EMBO Reports - Author Guidelines](#)  
[Molecular Systems Biology - Author Guidelines](#)  
[EMBO Molecular Medicine - Author Guidelines](#)

### Reporting Checklist for Life Science Articles (updated January)

This checklist is adapted from Materials Design Analysis Reporting (MDAR) Checklist for Authors. MDAR establishes a minimum set of requirements in transparent reporting in the life sciences (see Statement of Task: [10.31222/osf.io/9sm4x](https://doi.org/10.31222/osf.io/9sm4x)). Please follow the journal's guidelines in preparing your manuscript. **Please note that a copy of this checklist will be published alongside your article.**

### Abridged guidelines for figures

#### 1. Data

The data shown in figures should satisfy the following conditions:

- the data were obtained and processed according to the field's best practice and are presented to reflect the results of the experiments in an accurate and unbiased manner.
- ideally, figure panels should include only measurements that are directly comparable to each other and obtained with the same assay.
- plots include clearly labeled error bars for independent experiments and sample sizes. Unless justified, error bars should not be shown for technical replicates.
- if  $n < 5$ , the individual data points from each experiment should be plotted. Any statistical test employed should be justified.
- Source Data should be included to report the data underlying figures according to the guidelines set out in the authorship guidelines on Data

#### 2. Captions

Each figure caption should contain the following information, for each panel where they are relevant:

- a specification of the experimental system investigated (eg cell line, species name).
- the assay(s) and method(s) used to carry out the reported observations and measurements.
- an explicit mention of the biological and chemical entity(ies) that are being measured.
- an explicit mention of the biological and chemical entity(ies) that are altered/varied/perturbed in a controlled manner.
- the exact sample size (n) for each experimental group/condition, given as a number, not a range;
- a description of the sample collection allowing the reader to understand whether the samples represent technical or biological replicates (including how many animals, litters, cultures, etc.).
- a statement of how many times the experiment shown was independently replicated in the laboratory.
- definitions of statistical methods and measures:
  - common tests, such as t-test (please specify whether paired vs. unpaired), simple  $\chi^2$  tests, Wilcoxon and Mann-Whitney tests, can be unambiguously identified by name only, but more complex techniques should be described in the methods section;
  - are tests one-sided or two-sided?
  - are there adjustments for multiple comparisons?
  - exact statistical test results, e.g., P values = x but not P values < x;
  - definition of 'center values' as median or average;
  - definition of error bars as s.d. or s.e.m.

Please complete ALL of the questions below.  
Select "Not Applicable" only when the requested information is not relevant for your study.

### Materials

| Material                                                                                                                                                                                                      | Information included in the manuscript? | In which section is the information available?<br>(Reagents and Tools Table, Materials and Methods, Figures, Data Availability Section) |
|---------------------------------------------------------------------------------------------------------------------------------------------------------------------------------------------------------------|-----------------------------------------|-----------------------------------------------------------------------------------------------------------------------------------------|
| <b>Newly Created Materials</b>                                                                                                                                                                                |                                         |                                                                                                                                         |
| New materials and reagents need to be available; do any restrictions apply?                                                                                                                                   | Not Applicable                          |                                                                                                                                         |
| <b>Antibodies</b>                                                                                                                                                                                             |                                         |                                                                                                                                         |
| For <b>antibodies</b> provide the following information:<br>- Commercial antibodies: RRID (if possible) or supplier name, catalogue number and/or clone number<br>- Non-commercial: RRID or citation          | Yes                                     | Materials and Methods, Appendix, Acknowledgements                                                                                       |
| <b>DNA and RNA sequences</b>                                                                                                                                                                                  |                                         |                                                                                                                                         |
| Short novel DNA or RNA including primers, probes: provide the sequences.                                                                                                                                      | Yes                                     | Materials and Methods, Appendix                                                                                                         |
| <b>Cell materials</b>                                                                                                                                                                                         |                                         |                                                                                                                                         |
| <b>Cell lines:</b> Provide species information, strain. Provide accession number in repository OR supplier name, catalog number, clone number, and/OR RRID.                                                   | Yes                                     | Materials and Methods, Appendix                                                                                                         |
| <b>Primary cultures:</b> Provide species, strain, sex of origin, genetic modification status.                                                                                                                 | Not Applicable                          |                                                                                                                                         |
| Report if the cell lines were recently <b>authenticated</b> (e.g., by STR profiling) and tested for mycoplasma contamination.                                                                                 | Yes                                     | Materials and Methods, Appendix                                                                                                         |
| <b>Experimental animals</b>                                                                                                                                                                                   |                                         |                                                                                                                                         |
| <b>Laboratory animals or Model organisms:</b> Provide species, strain, sex, age, genetic modification status. Provide accession number in repository OR supplier name, catalog number, clone number, OR RRID. | Not Applicable                          |                                                                                                                                         |
| <b>Animal observed in or captured from the field:</b> Provide species, sex, and age where possible.                                                                                                           | Not Applicable                          |                                                                                                                                         |
| Please detail <b>housing and husbandry conditions</b> .                                                                                                                                                       | Not Applicable                          |                                                                                                                                         |
| <b>Plants and microbes</b>                                                                                                                                                                                    |                                         |                                                                                                                                         |
| <b>Plants:</b> provide species and strain, ecotype and cultivar where relevant, unique accession number if available, and source (including location for collected wild specimens).                           | Not Applicable                          |                                                                                                                                         |
| <b>Microbes:</b> provide species and strain, unique accession number if available, and source.                                                                                                                | Not Applicable                          |                                                                                                                                         |
| <b>Human research participants</b>                                                                                                                                                                            |                                         |                                                                                                                                         |
| If collected and within the bounds of privacy constraints report on age, sex and gender or ethnicity for all study participants.                                                                              | Not Applicable                          |                                                                                                                                         |
| <b>Core facilities</b>                                                                                                                                                                                        |                                         |                                                                                                                                         |
| If your work benefited from core facilities, was their service mentioned in the acknowledgments section?                                                                                                      | Yes                                     | Acknowledgements                                                                                                                        |

### Design

| <b>Study protocol</b>                                                                                                                                                                                                                                                                                                                      | <b>Information included in the manuscript?</b> | <b>In which section is the information available?</b><br>(Reagents and Tools Table, Materials and Methods, Figures, Data Availability Section) |
|--------------------------------------------------------------------------------------------------------------------------------------------------------------------------------------------------------------------------------------------------------------------------------------------------------------------------------------------|------------------------------------------------|------------------------------------------------------------------------------------------------------------------------------------------------|
| If study protocol has been <b>pre-registered</b> , provide DOI in the <b>manuscript</b> . For clinical trials, provide the trial registration number <b>OR</b> cite DOI.                                                                                                                                                                   | Not Applicable                                 |                                                                                                                                                |
| Report the <b>clinical trial registration number</b> (at ClinicalTrials.gov or equivalent), where applicable.                                                                                                                                                                                                                              | Not Applicable                                 |                                                                                                                                                |
| <b>Laboratory protocol</b>                                                                                                                                                                                                                                                                                                                 | <b>Information included in the manuscript?</b> | <b>In which section is the information available?</b><br>(Reagents and Tools Table, Materials and Methods, Figures, Data Availability Section) |
| Provide DOI OR other citation details if <b>external detailed step-by-step protocols</b> are available.                                                                                                                                                                                                                                    | Not Applicable                                 |                                                                                                                                                |
| <b>Experimental study design and statistics</b>                                                                                                                                                                                                                                                                                            | <b>Information included in the manuscript?</b> | <b>In which section is the information available?</b><br>(Reagents and Tools Table, Materials and Methods, Figures, Data Availability Section) |
| Include a statement about <b>sample size</b> estimate even if no statistical methods were used.                                                                                                                                                                                                                                            | Yes                                            | Table 1, Results, Figure legends                                                                                                               |
| Were any steps taken to minimize the effects of subjective bias when allocating animals/samples to treatment (e.g. <b>randomization procedure</b> )? If yes, have they been described?                                                                                                                                                     | Not Applicable                                 |                                                                                                                                                |
| Include a statement about <b>blinding</b> even if no blinding was done.                                                                                                                                                                                                                                                                    | Not Applicable                                 |                                                                                                                                                |
| Describe <b>inclusion/exclusion criteria</b> if samples or animals were excluded from the analysis. Were the criteria pre-established?                                                                                                                                                                                                     | Yes                                            | Results, Appendix (Quality control: regarding the selection of mitochondria to be included or excluded from the FRAP analysis)                 |
| If sample or data points were omitted from analysis, report if this was due to <b>attrition or intentional exclusion and provide justification</b> .                                                                                                                                                                                       | Yes                                            |                                                                                                                                                |
| For every figure, are <b>statistical tests</b> justified as appropriate? Do the data meet the assumptions of the tests (e.g., normal distribution)? Describe any methods used to assess it. Is there an estimate of variation within each group of data? Is the variance similar between the groups that are being statistically compared? | Yes                                            | Table 1, Results, Figure legends                                                                                                               |
| <b>Sample definition and in-laboratory replication</b>                                                                                                                                                                                                                                                                                     | <b>Information included in the manuscript?</b> | <b>In which section is the information available?</b><br>(Reagents and Tools Table, Materials and Methods, Figures, Data Availability Section) |
| In the figure legends: state number of times the experiment was <b>replicated</b> in laboratory.                                                                                                                                                                                                                                           | Yes                                            | Figure legends                                                                                                                                 |
| In the figure legends: define whether data describe <b>technical or biological replicates</b> .                                                                                                                                                                                                                                            | Yes                                            | Figure legends                                                                                                                                 |

#### Ethics

| <b>Ethics</b>                                                                                                                                                                                                                                                                                            | <b>Information included in the manuscript?</b> | <b>In which section is the information available?</b><br>(Reagents and Tools Table, Materials and Methods, Figures, Data Availability Section) |
|----------------------------------------------------------------------------------------------------------------------------------------------------------------------------------------------------------------------------------------------------------------------------------------------------------|------------------------------------------------|------------------------------------------------------------------------------------------------------------------------------------------------|
| Studies involving <b>human participants</b> : State details of <b>authority granting ethics approval</b> (IRB or equivalent committee(s), provide reference number for approval).                                                                                                                        | Not Applicable                                 |                                                                                                                                                |
| Studies involving <b>human participants</b> : Include a statement confirming that <b>informed consent</b> was obtained from all subjects and that the experiments conformed to the principles set out in the WMA Declaration of Helsinki and the Department of Health and Human Services Belmont Report. | Not Applicable                                 |                                                                                                                                                |
| Studies involving <b>human participants</b> : For publication of <b>patient photos</b> , include a statement confirming that consent to publish was obtained.                                                                                                                                            | Not Applicable                                 |                                                                                                                                                |
| Studies involving experimental <b>animals</b> : State details of <b>authority granting ethics approval</b> (IRB or equivalent committee(s), provide reference number for approval. Include a statement of compliance with ethical regulations.                                                           | Not Applicable                                 |                                                                                                                                                |
| Studies involving <b>specimen and field samples</b> : State if relevant <b>permits</b> obtained, provide details of authority approving study; if none were required, explain why.                                                                                                                       | Not Applicable                                 |                                                                                                                                                |
| <b>Dual Use Research of Concern (DURC)</b>                                                                                                                                                                                                                                                               | <b>Information included in the manuscript?</b> | <b>In which section is the information available?</b><br>(Reagents and Tools Table, Materials and Methods, Figures, Data Availability Section) |
| Could your study fall under dual use research restrictions? Please check biosecurity documents and list of <b>select agents and toxins</b> (CDC): <a href="https://www.selectagents.gov/sat/list.htm">https://www.selectagents.gov/sat/list.htm</a> .                                                    | Not Applicable                                 |                                                                                                                                                |
| If you used a select agent, is the security level of the lab appropriate and reported in the manuscript?                                                                                                                                                                                                 | Not Applicable                                 |                                                                                                                                                |
| If a study is subject to dual use research of concern regulations, is the name of the <b>authority granting approval and reference number</b> for the regulatory approval provided in the manuscript?                                                                                                    | Not Applicable                                 |                                                                                                                                                |

#### Reporting

The MDAR framework recommends adoption of discipline-specific guidelines, established and endorsed through community initiatives. Journals have their own policy about requiring specific guidelines and recommendations to complement MDAR.

| <b>Adherence to community standards</b>                                                                                                                                                                                                                                                                                              | <b>Information included in the manuscript?</b> | <b>In which section is the information available?</b><br>(Reagents and Tools Table, Materials and Methods, Figures, Data Availability Section) |
|--------------------------------------------------------------------------------------------------------------------------------------------------------------------------------------------------------------------------------------------------------------------------------------------------------------------------------------|------------------------------------------------|------------------------------------------------------------------------------------------------------------------------------------------------|
| State if relevant guidelines or checklists (e.g., ICMJE, MIBBI, ARRIVE, PRISMA) have been followed or provided.                                                                                                                                                                                                                      | Not Applicable                                 |                                                                                                                                                |
| For <b>tumor marker prognostic studies</b> , we recommend that you follow the <b>REMARK</b> reporting guidelines (see link list at top right). See author guidelines, under 'Reporting Guidelines'. Please confirm you have followed these guidelines.                                                                               | Not Applicable                                 |                                                                                                                                                |
| For <b>phase II and III randomized controlled trials</b> , please refer to the <b>CONSORT</b> flow diagram (see link list at top right) and submit the <b>CONSORT</b> checklist (see link list at top right) with your submission. See author guidelines, under 'Reporting Guidelines'. Please confirm you have submitted this list. | Not Applicable                                 |                                                                                                                                                |

#### Data Availability

| <b>Data availability</b>                                                                                                                                                                          | <b>Information included in the manuscript?</b> | <b>In which section is the information available?</b><br>(Reagents and Tools Table, Materials and Methods, Figures, Data Availability Section) |
|---------------------------------------------------------------------------------------------------------------------------------------------------------------------------------------------------|------------------------------------------------|------------------------------------------------------------------------------------------------------------------------------------------------|
| Have <b>primary datasets</b> been deposited according to the journal's guidelines (see 'Data Deposition' section) and the respective accession numbers provided in the Data Availability Section? | Not Applicable                                 |                                                                                                                                                |
| Were <b>human clinical and genomic datasets</b> deposited in a public access-controlled repository in accordance to ethical obligations to the patients and to the applicable consent agreement?  | Not Applicable                                 |                                                                                                                                                |
| Are <b>computational models</b> that are central and integral to a study available without restrictions in a machine-readable form? Were the relevant accession numbers or links provided?        | Yes                                            | Data availability section                                                                                                                      |
| If publicly available data were reused, provide the respective <b>data citations in the reference list</b> .                                                                                      | Not Applicable                                 |                                                                                                                                                |
